# Supplementary material for: Global, Regional, and National Cancer Incidence, Mortality, Years of Life Lost, Years Lived With Disability, and Disability-Adjusted Life-Years for 29 Cancer Groups, 1990 to 2017: A Systematic Analysis for the Global Burden of Disease Study
Source: PubMed Central journal article supplement (PMC6777271; doi:10.1001/jamaoncol.2019.2996), 2019-09-27
Supplement: jamaoncol-5-1749-s001.pdf [file jamaoncol-5-1749-s001.pdf]

## Supplementary Online Content

Global Burden of Disease Cancer Collaboration. Global, Regional, and National Cancer Incidence, Mortality, Years of Life Lost, Years Lived With Disability, and Disability-Adjusted Life-Years for 29 Cancer Groups, 1990 to 2017: A Systematic Analysis for the Global Burden of Disease Study. *JAMA Oncol*. Published online September 27, 2019. doi:10.1001/jamaoncol.2019.2996

**eAppendix.**

**eTables 1 through 18.**

**eFigures 1 through 16.**

This supplementary material has been provided by the authors to give readers additional information about their work.

## Supplementary Online Content

Global Burden of Disease Cancer Collaboration. Global, regional, and national cancer incidence, mortality, years of life lost, years lived with disability, and disability-adjusted life years for 29 cancer groups, 1990 to 2017: a systematic analysis for the Global Burden of Disease Study 2017.

Of note, updates to this appendix were only made if relevant, other parts remain the same as in the appendix to the GBD 2016 manuscript “Global Burden of Disease Cancer Collaboration, Fitzmaurice C, Akinyemiju TF, et al. Global, Regional, and National Cancer Incidence, Mortality, Years of Life Lost, Years Lived With Disability, and Disability-Adjusted Life-Years for 29 Cancer Groups, 1990 to 2016: A Systematic Analysis for the Global Burden of Disease Study. JAMA Oncol. June 2018. doi:10.1001/jamaoncol.2018.2706.” Certain parts of this appendix have also been published in other GBD 2017 publications.<sup>1-5</sup>

## eAppendix

|                                                                                                                                                                                  |    |
|----------------------------------------------------------------------------------------------------------------------------------------------------------------------------------|----|
| TABLES.....                                                                                                                                                                      | 3  |
| FIGURES.....                                                                                                                                                                     | 3  |
| Additional method summaries for all GBD neoplasms except for NMSC, benign and in situ neoplasms, and myelodysplastic, myeloproliferative, and other hematological neoplasms..... | 5  |
| Definition of indicator .....                                                                                                                                                    | 5  |
| Data sources.....                                                                                                                                                                | 5  |
| Cancer incidence data sources.....                                                                                                                                               | 5  |
| Mortality/incidence ratio data sources .....                                                                                                                                     | 5  |
| Cancer mortality data sources .....                                                                                                                                              | 5  |
| Bias of categories of input data .....                                                                                                                                           | 6  |
| Data analysis .....                                                                                                                                                              | 6  |
| Cancer registry data formatting.....                                                                                                                                             | 6  |
| Cause of death database formatting .....                                                                                                                                         | 9  |
| CODEm models .....                                                                                                                                                               | 9  |
| Liver cancer etiology split models.....                                                                                                                                          | 9  |
| CoDCorrect.....                                                                                                                                                                  | 11 |
| Incidence estimation.....                                                                                                                                                        | 11 |
| Prevalence and YLD estimation .....                                                                                                                                              | 11 |
| Probability of cancer .....                                                                                                                                                      | 13 |

|                                                                                                                                                                                                                                                                                                                                |    |
|--------------------------------------------------------------------------------------------------------------------------------------------------------------------------------------------------------------------------------------------------------------------------------------------------------------------------------|----|
| Additional method summaries for NMSC, benign and in situ neoplasms, and myelodysplastic, myeloproliferative, and other hematological neoplasms.....                                                                                                                                                                            | 14 |
| Non-melanoma skin cancer (squamous and basal cell carcinoma).....                                                                                                                                                                                                                                                              | 14 |
| Case definition .....                                                                                                                                                                                                                                                                                                          | 14 |
| Non-melanoma skin cancer (NMSC) is defined as basal cell carcinoma and squamous cell carcinoma. NMSC does not include other types of skin cancer (e.g., melanoma, Merkel cell carcinoma). .....                                                                                                                                | 14 |
| Input data.....                                                                                                                                                                                                                                                                                                                | 14 |
| We estimated squamous cell and basal cell skin cancer incidence by using cancer registry as well as primary literature and MarketScan data for incidence. Only cancer registries that were listed in CI5 VIII as registering squamous cell carcinoma or basal cell carcinoma, respectively, were included in the analysis..... | 14 |
| Modeling strategy .....                                                                                                                                                                                                                                                                                                        | 14 |
| Myelodysplastic, myeloproliferative, and other hematological neoplasms.....                                                                                                                                                                                                                                                    | 14 |
| Case definition .....                                                                                                                                                                                                                                                                                                          | 14 |
| Input data.....                                                                                                                                                                                                                                                                                                                | 15 |
| Modeling strategy .....                                                                                                                                                                                                                                                                                                        | 15 |
| Benign and in situ intestinal neoplasms; benign and in situ cervical and uterine neoplasms; other benign and in situ neoplasms .....                                                                                                                                                                                           | 15 |
| Case definition .....                                                                                                                                                                                                                                                                                                          | 15 |
| Input data.....                                                                                                                                                                                                                                                                                                                | 15 |
| Modeling strategy .....                                                                                                                                                                                                                                                                                                        | 15 |
| References .....                                                                                                                                                                                                                                                                                                               | 17 |
| Supplementary Tables and Figures.....                                                                                                                                                                                                                                                                                          | 21 |

## TABLES

|                                                                                                                                                          |     |
|----------------------------------------------------------------------------------------------------------------------------------------------------------|-----|
| eTable 1: GATHER guidelines checklist .....                                                                                                              | 21  |
| eTable 2: Sources for cancer incidence and mortality-to-incidence ratio data by country, year, and registry .....                                        | 23  |
| eTable 3: Number of site-years for cancer mortality data by type.....                                                                                    | 45  |
| eTable 4: List of International Classification of Diseases (ICD) codes mapped to the Global Burden of Disease cause list for cancer incidence data.....  | 53  |
| eTable 5: List of International Classification of Diseases (ICD) codes mapped to the Global Burden of Disease cause list for cancer mortality data ..... | 55  |
| eTable 6: Undefined cancer code categories (ICD-10) and respective target codes for cancer registry incidence data.....                                  | 57  |
| eTable 7: Socio-demographic Index groupings by geography, based on 2017 values .....                                                                     | 57  |
| eTable 8: Covariates selected for CODEm for each GBD cancer group and expected direction of covariate .....                                              | 62  |
| eTable 9: Comparison of GBD 2016 and GBD 2017 covariates used and level of covariates.....                                                               | 93  |
| eTable 10: Results for CODEm model testing .....                                                                                                         | 121 |
| eTable 11: Percent change before and after CoDCorrect by cancer for all ages, both sexes combined, 2017 .....                                            | 129 |
| eTable 12: Duration of four prevalence phases by cancer .....                                                                                            | 131 |
| eTable 13: Disability weights .....                                                                                                                      | 134 |
| eTable 14: Decomposition of trends in incidence globally, and by SDI quintile, both sexes, 2007 to 2017 .....                                            | 135 |
| eTable 15: Contribution of YLDs and YLLs to DALYs by cancer, global, both sexes, 2017 .....                                                              | 144 |
| eTable 16: Probability of developing cancer within selected age intervals, global, and by SDI quintile, by sex, 2007-2017 in % (odds) .....              | 145 |
| eTable 17: List of 22 level 2 causes in the GBD cause hierarchy .....                                                                                    | 164 |
| eTable 18: Global number of incidence, prevalence, YLDs, deaths, YLLs, DALYs for both sexes, 1990 and 2017 for all level 2 GBD causes.....               | 165 |

## FIGURES

|                                                                                                                                                                                             |     |
|---------------------------------------------------------------------------------------------------------------------------------------------------------------------------------------------|-----|
| eFigure 1: Flowchart GBD cancer mortality, YLL estimation .....                                                                                                                             | 178 |
| eFigure 2: Flowchart GBD cancer incidence, prevalence, YLD estimation .....                                                                                                                 | 179 |
| eFigure 3: Socio-demographic Index quintiles.....                                                                                                                                           | 180 |
| eFigure 4: Contribution of YLDs and YLLs to DALYs by cancer, global, both sexes, 2017 .....                                                                                                 | 181 |
| eFigure 5: Cancer ranking by total incidence based on global level for developing and developed regions and all countries, both sexes, 2017 .....                                           | 182 |
| eFigure 6: Cancer ranking by total mortality based on global level for developing and developed regions and all countries, both sexes, 2017 .....                                           | 200 |
| eFigure 7: Top-ranked cancers by absolute incident cases for all ages in males, 2017.....                                                                                                   | 201 |
| eFigure 8: Top-ranked cancers by absolute incident cases for all ages in females, 2017 .....                                                                                                | 202 |
| eFigure 9: Top-ranked cancers by absolute deaths for all ages in males, 2017 .....                                                                                                          | 203 |
| eFigure 10: Top-ranked cancers by absolute deaths for all ages in females, 2017 .....                                                                                                       | 204 |
| eFigure 11: Global Decomposition of Changes in Cancer Incident Cases due to Population Growth, Population Aging, and Changes in Age-specific Incidence Rates, Both Sexes, 2007 to 2017..... | 205 |

|                                                                                                                                                                                                                |     |
|----------------------------------------------------------------------------------------------------------------------------------------------------------------------------------------------------------------|-----|
| eFigure 12: High SDI quintile decomposition of changes in cancer incident cases due to population growth, population ageing, and changes in age-specific incidence rates, both sexes, 2007 to 2017....         | 206 |
| eFigure 13: High-middle SDI quintile decomposition of changes in cancer incident cases due to population growth, population ageing, and changes in age-specific incidence rates, both sexes, 2007 to 2017..... | 207 |
| eFigure 14: Middle SDI quintile decomposition of changes in cancer incident cases due to population growth, population ageing, and changes in age-specific incidence rates, both sexes, 2007 to 2017....       | 208 |
| eFigure 15: Low-middle SDI quintile decomposition of changes in cancer incident cases due to population growth, population ageing, and changes in age-specific incidence rates, both sexes, 2007 to 2017....   | 209 |
| eFigure 16: Low SDI quintile decomposition of changes in cancer incident cases due to population growth, population ageing, and changes in age-specific incidence rates, both sexes, 2007 to 2017....          | 210 |

## Additional method summaries for all GBD neoplasms except for NMSC, benign and in situ neoplasms, and myelodysplastic, myeloproliferative, and other hematological neoplasms

### Definition of indicator

The GBD cause list is organized in a hierarchy. Levels 1 and 2 represent general groupings. The broad group “neoplasms,” which includes all malignant and benign neoplasms, is at Level 2 under the Level 1 group “Non-communicable diseases.” Level 3 includes 29 cancer groups, and Level 4 includes 37 groups since in Level 4, leukemia, liver cancer, and non-melanoma skin cancer are further subdivided. In this publication, estimates for the GBD cancer groups, for both sexes, for the time from 1980 to 2017, and for the 5-year GBD age groups (0-5; 5-9; etc. until 95+) are presented for 195 countries or territories. All ICD9 codes pertaining to cancer (140-209) and ICD10 codes (C00-C96) except for Kaposi sarcoma (ICD10: C46) are included in the estimates for “malignant neoplasms,” all ICD9 and ICD10 codes pertaining to neoplasms (ICD9 140-239, ICD10 C00-D49) are included in the estimates for “neoplasms.” Of note, in the GBD Compare visualization (<https://vizhub.healthdata.org/gbd-compare/>), the Level 3 cause “other neoplasms” (ICD9 codes 210-239, ICD10 codes D00-D49), which includes the Level 4 causes “myelodysplastic, myeloproliferative, and other hematopoietic neoplasms,” “benign and in situ cervical and uterine neoplasms,” “benign and in situ intestinal neoplasms,” and “other benign and in situ neoplasms”) are not counted in the total incidence for the Level 2 “neoplasms” cause. However, they are counted for prevalence, mortality, years lived with disability (YLDs), years of life lost (YLLs), and disability-adjusted life years (DALYs). eTable 4 and eTable 5 list all ICD codes and their respective GBD cause. Countries and territories reported can be found in eTable 7.

### Data sources

#### Cancer incidence data sources

Cancer incidence was sought from individual cancer registries or aggregated databases of cancer registry data like “Cancer Incidence In Five Continents” (CI5),<sup>6-15</sup> EUREG,<sup>16</sup> or NORDCAN.<sup>17</sup> Data were excluded if they were not representative of the coverage population (e.g., hospital-based registries), if they did not cover all malignant neoplasms as defined in ICD9 (140-208) or ICD10 (C00-C96) (e.g., specialty cancer registry), if they did not include data for both sexes and all age groups, if the data were limited to years prior to 1980, or if the source did not provide details on the population covered. Preference was given to registries with national coverage over those with only local coverage, except those from countries where the GBD study provides subnational estimates. A list of the cancer registries included in our analysis and the years covered can be found in eTable 2. Additional metadata for each source are available in the online GBD citation tool, <http://ghdx.healthdata.org/gbd-2017>.

#### Mortality/incidence ratio data sources

Most cancer registries only report cancer incidence. However, if a cancer registry also reported cancer mortality, mortality data were also extracted from the source to be used in the mortality to incidence estimation. eTable 2 lists the registries used for the estimation of mortality-to-incidence ratios.

#### Cancer mortality data sources

A detailed description of the data sources and processing steps for the cause of death database can be found in the appendix to the GBD 2017 paper “Global, regional, and national age-sex-specific mortality

for 282 causes of death in 195 countries and territories, 1980–2017: a systematic analysis for the Global Burden of Disease Study 2017.”<sup>13</sup>

#### Bias of categories of input data

Bias of the input data included for the COD database is described elsewhere.<sup>13</sup> Cancer registry data can be biased in multiple ways. A high proportion of ill-defined cancer cases in the registry data requires redistribution of these cases to other cancers, which introduces a potential for bias. Changes between coding systems can lead to artificial differences in disease estimates; however, we adjust for this bias by mapping the different coding systems to the GBD causes. Underreporting of cancers that require advanced diagnostic techniques (e.g., leukemia, brain, pancreatic, and liver cancer) can be an issue in cancer registries from low-income countries. On the other hand, misclassification of metastatic sites as primary cancer can lead to overestimation of cancer sites that are common sites for metastases like brain or liver. Since many cancer registries are located in urban areas, the representativeness of the registry for the general population can also be problematic. The accuracy of mortality data reported in cancer registries usually depends on the quality of the vital registration system. If the vital registration system is incomplete or of poor quality, the mortality-to-incidence ratio can be biased to lower ratios.

#### Data analysis

Flowcharts describing the conceptual overview of the data processing are available in eFigure 1 and eFigure 2.

#### Cancer registry data formatting

Cancer registry data went through multiple processing steps before integration with the COD database. First, the original data were transformed into standardized files, which included standardization of format, categorization, and registry names (#1 in eFigure 1).

Second, some cancer registries report individual codes as well as aggregated totals (e.g., C18, C19, and C20 are reported individually, but the aggregated group of C18–C20 (colorectal cancer) is also reported in the registry data). The data processing step, “subtotal recalculation” (#2 in flowchart), verifies these totals and subtracts the values of any individual codes from the aggregates.

In the third step (#3 in the flowchart), cancer registry incidence data and cancer registry mortality data are mapped to GBD causes. A different map is used for incidence and for mortality data because of the assumption that there are no deaths for certain cancers. One example is basal cell carcinoma of the skin. In the cancer registry incidence data, basal cell carcinoma is mapped to non-melanoma skin cancer (basal cell carcinoma). However, if basal cell skin cancer is recorded in the cancer registry mortality data, the deaths are instead mapped to non-melanoma skin cancer (squamous cell carcinoma) under the assumption that they were indeed misclassified squamous cell skin cancers. Other examples are benign or in situ neoplasms. Benign or in situ neoplasms found in the cancer registry incidence dataset were simply dropped from that dataset since cancer registries do not collect non-malignant neoplasms in a standardized way. The same neoplasms reported in a cancer registry mortality dataset were mapped to the respective invasive cancer (e.g., melanoma in situ in the cancer registry incidence dataset was dropped from the dataset; melanoma in situ in the cancer registry mortality dataset was mapped to melanoma). Mapping for incidence and mortality data can be found in eTable 4 and eTable 5.

In the fourth data processing step (#4 in the flowchart), cancer registry data were standardized to the GBD age groups. Age-specific incidence rates were generated age weights from administrative claims data as specified in appendix section 2.1.5 (James SL, Abate D, Abate KH, et al. Global, regional, and national incidence, prevalence, and years lived with disability for 354 diseases and injuries for 195

countries and territories, 1990–2017: a systematic analysis for the Global Burden of Disease Study 2017. *The Lancet*. 2018;392(10159):1789-1858. doi:10.1016/S0140-6736(18)32279-7,<sup>14</sup> while age-specific mortality rates were generated from the CoD data.<sup>13</sup> Age-specific weights were then generated by applying the age-specific rates to a given registry population that required age-splitting to produce the expected number of cases/deaths for that registry by age. The expected number of cases/deaths for each sex, age, and cancer were then normalized to 1, creating final, age-specific proportions. These proportions were then applied to the total number of cases/deaths by sex and cancer to get the age-specific number of cases/deaths.

In the rare case that the cancer registry only contained data for both sexes combined, the age-specific cases/deaths were split and reassigned to separate sexes using the same weights that are used for the age-splitting process. Starting from the expected number of deaths, proportions were generated by sex for each age (e.g., if for ages 15-19 years old there are 6 expected deaths for males and 4 expected deaths for females, then 60% of the combined-sex deaths for ages 15-19 years would be assigned to males and the remaining 40% would be assigned to females).

In the fifth step (#5 in the flowchart), data for cause entries that are aggregates of GBD causes were redistributed. Examples of these aggregated causes include some registries reporting ICD10 codes C00-C14 together as, “lip, oral cavity, and pharyngeal cancer.” These groups were broken down into subcauses that could be mapped to single GBD causes. In this example, those include lip and oral cavity cancer (C00-C08), nasopharyngeal cancer (C11), cancer of other parts of the pharynx (C09-C10, C12-C13), and “Malignant neoplasm of other and ill-defined sites in the lip, oral cavity, and pharynx” (C14). To redistribute the data, weights were created using the same method employed in age-sex splitting (see step four above). For the undefined code (C14 in the example) an “average all cancer” weight was used, which was generated by adding all cases from SEER/NORDCAN/CI5 and dividing those by the combined population. Then, proportions were generated by subcause for each aggregate cause as in the sex-splitting example above (see step four). The total number of cases from the aggregated group (C00-C14) was recalculated for each subgroup and the undefined code (C14). C14 was then redistributed as an insufficiently specific code in step six. Distinct proportions were used for C46 (Kaposi sarcoma). C46 entries were redistributed as “other cancer” and HIV.

In the sixth step (#6 in the flowchart), unspecified codes (“garbage code”) were redistributed. Redistribution of cancer registry incidence and mortality data mirrored the process of the redistribution used in the cause of death database and has not changed compared to GBD 2013.<sup>19</sup>

In the seventh step (#7 in the flowchart), duplicate or redundant sources were removed from the processed cancer registry dataset. Duplicate sources were present if, for example, the cancer registry was part of the CI5 database but we also had data from the registry directly. Redundancies occurred and were removed as described in “Inclusion and Exclusion Criteria,” where more detailed data were available, or when national registry data could replace regionally representative data. From here, two parallel selection processes were run to generate input data for the MI models and to generate incidence for final mortality estimation. Higher priority was given to registry data from the most standardized source when creating the final incidence input, whereas for the MI model input, only sources that reported incidence and mortality were used.

In the eighth step (#8 in the flowchart), the processed incidence and mortality data from cancer registries were matched by cancer, age, sex, year, and location to generate MI ratios. These MI ratios were used as input for a three-step modeling approach using the general GBD ST-GPR<sup>17</sup> approach with the HAQ Index as a covariate in the linear step mixed effects model using a logit link function.<sup>20</sup>



$$\text{logit}(MI\ ratio_{c,a,s,t}) = \alpha + \beta_1 HAQI_{c,t} + \sum_a^A \beta_2 I_a + \beta_3 I_s + \epsilon_{c,a,s,t}$$

c: country, a: age group, t: time (years); s: sex

HAQI: Healthcare Access and Quality index

I: indicator variable

$\epsilon_{c,a,s,t}$ : error term

This is different compared to GBD 2016, where we used the Socio-demographic Index (SDI) as a predictor. Predictions were made without the random effects. The ST-GPR model has three main hyper-parameters that control for smoothing across time, age, and geography. The time adjustment parameter ( $\lambda$ ) was set to 0.07, which aims to borrow strength from neighboring time points (i.e., the exposure in this year is highly correlated with exposure in the previous year but less so further back in time). The age adjustment parameter  $\omega$  was set to 1, which borrows strength from data in neighboring age groups. The space adjustment parameter  $\xi$  was set to 0.02. Zeta aims to borrow strength across the hierarchy of geographical locations.<sup>18</sup> For the amplitude parameter in the Gaussian process regression we used 1 and for the scale we used a value of 15.

The data cleaning has remained the same as in GBD 2016 where we excluded data based on the SDI quintile categorization. For each cancer, MI ratios from locations in SDI quintiles 1-4 (low to high-middle SDI) were dropped if they were below the median of MI ratios from locations in SDI quintile 5 (high SDI). We also dropped MI ratios from locations in SDI quintiles 1-4 if the MI ratios were above the third quartile + 1.5 \* IQR (inter-quartile range). We dropped all MIR that were based on less than 25 cases to avoid noise due to small numbers except for mesothelioma and acute lymphoid leukemia, where we dropped MIR that were based on less than 10 cases because of lower data availability for these two cancers. We also aggregated incidence and mortality to the youngest five-year age bin where we had at least 50 data points to avoid MIR predictions in young age groups that were based on few data points. The MIR in the age-bin that was used to aggregate MIR was used to backfill the MIR for younger age groups.

Since MI ratios can be above 1, especially in older age groups and cancers with low cure rates, we used the 95<sup>th</sup> percentile of the cleaned dataset that only included MIR that were based on 50 or more cases to cap the MIR input data. This “upper cap” was used to allow MIR over 1 but to constrain the MIR to a maximum level. To run the logit model, the input data were divided by the upper caps and model predictions after ST-GPR was rescaled by multiplying them by the upper caps.

Upper caps used for GBD 2017 were the following:

| Age group | Maximum MIR |
|-----------|-------------|
| 0-4       | 0.56        |
| 5-9       | 0.71        |
| 10-14     | 0.84        |
| 15-19     | 0.86        |
| 20-24     | 0.65        |
| 25-29     | 0.59        |
| 30-34     | 0.63        |
| 35-39     | 0.73        |

|       |      |
|-------|------|
| 40-44 | 0.83 |
| 45-49 | 0.86 |
| 50-54 | 0.89 |
| 55-59 | 0.91 |
| 60-64 | 0.96 |
| 65-69 | 1.01 |
| 70-74 | 1.09 |
| 75-79 | 1.22 |
| 80-84 | 1.36 |
| 85-89 | 1.39 |
| 90-94 | 1.45 |
| 95+   | 1.87 |

To constrain the model at the lower end, we used the 5<sup>th</sup> percentile of the cancer-specific cleaned MIR input data to replace all model predictions with this lower cap.

Final MI ratios were matched with the cancer registry incidence dataset in the ninth step (#9 in the flowchart) to generate mortality estimates (Incidence \* Mortality/Incidence = Mortality) (#10 in the flowchart). The final mortality estimates were then uploaded into the COD database (#11 in the flowchart). Cancer-specific mortality modeling then followed the general CODEm process.

### Cause of death database formatting

Formatting of data sources for the cause of death database has been described in detail elsewhere (#11 in the flowchart).<sup>13</sup>

### CODEm models

Mortality estimates for each cancer were generated using CODEm (#12 in the flowchart). Methods describing the CODEm approach have been described elsewhere.<sup>2,21</sup> In brief, the CODEm modeling approach is based on the principles that all types of available data should be used even if data quality varies; that individual models but also ensemble models should be tested for their predictive validity; and that the best model or sets of models should be chosen based on the out of sample predictive validity. Models were run separately for countries with extensive and complete vital registration data and countries with less VR data to prevent an inflation in the uncertainty around the estimates in “data-rich” countries. Covariates were selected based on a possible predictive relationship between the covariate and the specific cancer mortality. Level 1 covariates have a proven strong relationship with the outcome such as etiological or biological roles. Level 2 covariates have a strong relationship but not a direct biological link. Covariates that are more distal in the causal chain or are mediated through Level 1 or 2 covariates are categorized as Level 3.<sup>21</sup> Differences in covariate selection between GBD 2016 and GBD 2017 by cause and direction of the covariate can be found in eTable 9.

### Liver cancer etiology split models

For GBD 2017, the etiologies for liver cancer were expanded to include a separate etiology of liver cancer due to non-alcoholic steatohepatitis (NASH). To find the proportion of liver cancer cases due to the five etiology groups included in GBD (1. Liver cancer due to hepatitis B, 2. Liver cancer due to hepatitis C, 3. Liver cancer due to alcohol, 4. Liver cancer due to NASH, 5. Liver cancer due to other

causes), a systematic literature search was performed in PubMed on 10/24/2016 using the following search string: (“liver neoplasms”[All Fields] OR “HCC”[All Fields] OR “liver cancer”[All Fields] OR “Carcinoma, Hepatocellular”[Mesh]) AND (“hepatitis B”[All Fields] OR “Hepatitis B”[Mesh] OR “Hepatitis B virus”[Mesh] OR “Hepatitis B Antibodies”[Mesh] OR “Hepatitis B Antigens”[Mesh]) OR (“hepatitis C”[All Fields] OR “Hepatitis C”[Mesh] OR “hepatitis C antibodies”[MESH] OR “Hepatitis C Antigens”[Mesh] OR “Hepacivirus”[Mesh]) OR (“alcohol”[All Fields] OR “Alcohol Drinking”[Mesh] OR “Alcohol-Related Disorders”[Mesh] OR “Alcoholism”[Mesh] OR “Alcohol-Induced Disorders”[Mesh]) NOT (animals[MeSH] NOT humans[MeSH]). Also, studies not found through this search but included in the meta-analysis by de Martel et al, were included.<sup>22</sup> We also included the study by Hong et al, after the authors provided us with additional data on the overlap in risk factors.<sup>23</sup>

Studies were included if the study population was representative of liver cancer population for the respective location. For each study, the proportions of liver cancer due to the five specific risk factors were calculated. Cases were considered to be due to NASH when the manuscript explicitly listed the etiology to be NASH or non-alcoholic fatty liver disease (NAFLD). Cases where the etiology was listed as “cryptogenic,” “idiopathic,” or “unknown” were included within the “other causes” category. In manuscripts where the etiology for a case was not known but major categories could not be ruled out (for example, the study tested for hepatitis B and C, but did not assess alcohol use), these cases were excluded from the numerator of the study (in other words, did not contribute a proportion to any etiology). Remaining risk factors were included under a combined “other” group (for example, hemochromatosis, autoimmune hepatitis, Wilson’s disease, etc.). If multiple risk factors were reported for an individual patient, these were apportioned proportionally to the individual risk factors. The proportion data found through the systematic literature review were used as input for five separate DisMod-MR 2.1 models to determine the proportion of liver cancers due to the five subgroups for all locations, both sexes, and all age groups (step #16 in the flowchart). A study covariate was used for publications that only assessed liver cancer in a cirrhotic population. The reference or “gold standard” that was used for crosswalking was the compilation of all studies that assessed the etiology of liver cancer in a general population. For liver cancer due to hepatitis C and hepatitis B, a prior value of 0 was set between age 0 and 0.01. For liver cancer due to alcohol, a prior value of 0 was set for ages 0 to 5 years. For liver cancer due to hepatitis C, hepatitis C (IgG) seroprevalence was used as a covariate as well as a covariate for alcohol (liters per capita), hepatitis B prevalence (HBsAg seroprevalence), and NASH/NAFLD prevalence, forcing a negative relationship between the alcohol, hepatitis B, hepatitis C, and NASH/NAFLD covariates and the outcome of liver cancer due to alcohol proportion. For liver cancer due to hepatitis B, seroprevalence of HBsAg was used as a covariate as well as a covariate for alcohol, hepatitis C IgG seroprevalence, NASH/NAFLD prevalence, and the population coverage of three-dose Hepatitis B vaccination, forcing a negative relationship between these covariates and the outcome of liver cancer due to hepatitis B proportion. For liver cancer due to alcohol, alcohol (liters per capita) was used as a covariate as well as a covariate for proportion of alcohol abstainers, hepatitis B and hepatitis C seroprevalence, and NASH/NAFLD prevalence, forcing a negative relationship between the proportion of alcohol abstainers, NASH/NAFLD, and hepatitis B and hepatitis C covariates and the outcome of liver cancer due to alcohol proportion. For liver cancer due to NASH, NASH/NAFLD prevalence was used as a covariate as well as a covariate for obesity prevalence and mean body mass index (BMI), forcing a positive relationship between these covariates and the outcome of liver cancer due to NASH proportion. All covariates used were modeled independently. To ensure consistency between cirrhosis and liver cancer estimates and to take advantage of the data for the respective other related cause (e.g., liver

cancer due to hepatitis C and the related cause cirrhosis due to hepatitis C), we generated covariates from the liver cancer proportion models that we used in the cirrhosis etiology proportion models. We then created covariates from the cirrhosis etiology proportion models and used those in the liver cancer etiology models.

Since the proportion models are run independently of each other, the final proportion models were scaled to sum to 100% within each age, sex, year, and location, by dividing each proportion by the sum of the five (step # 17). For the liver cancer subtype mortality estimates, we multiplied the parent cause “liver cancer” by the corresponding scaled proportions (step # 18). Single cause estimates were adjusted to fit into the separately modeled all-cause mortality in the process CoDCorrect.

### CoDCorrect

CODEm models estimate the individual cause-level mortality without taking into account the all-cause mortality (#13 in the flowchart). To ensure that all single causes add up to the all-cause mortality and that all child-causes add up to the parent cause, an algorithm called “CoDCorrect” is used (#14 and #15 in the flowchart). Details regarding the algorithm can be found elsewhere.<sup>13</sup>

### Incidence estimation

GBD cancer incidence estimates were generated by dividing final mortality estimates (after CoDCorrect adjustment) by the MI ratio for the specific cancer (#1 eFigure 2). To propagate uncertainty from the MI ratios and the mortality estimates to incidence, this process was done at the 1,000-draw level. It was assumed that uncertainty in the MI ratio is independent of uncertainty in the estimated age-specific death rates.

### Prevalence and YLD estimation

Prevalence is estimated as 10-year prevalence for all cancers. After transforming the final GBD cancer mortality estimates to incidence estimates (step 1 in the flowchart), incidence was combined with the relative yearly survival estimates up to 10 years (step 7 in the flowchart). For GBD 2017 we updated our methods to more directly utilize MIRs to generate these yearly cancer relative survival estimates. Previous reports suggest that the value of  $(1 - \text{MIR})$  may serve as a proxy for 5-year relative survival, with the exact correlation varying slightly by cancer type.<sup>24</sup> We used SEER\*Stat to obtain national mortality, incidence, and relative survival statistics from the nine SEER registries reporting from 1980 to 2014 (step 2), by cancer type, sex, 5-year blocks (i.e., 1980–1984, 1985–1989, etc.), and 5-year age groups (except combining 80+). For each cancer, we modeled 5-year relative survival with the SEER MIRs using Poisson regression, weighted by the number of incident cases (step 3). To reduce variability due to small samples, we only included MIRs based on at least 25 incident cases (except for the rarer cancers mesothelioma, nasopharyngeal cancer, and acute myeloid leukemia, where MIRs based on at least 10 cases were included). These models were then applied to the GBD MIR estimates to predict an estimated 5-year survival for each age/sex/year/location (winsorized to between 0 and 100% survival; step 4). To obtain yearly survival estimates up to 10 years, we compared these estimates to the SEER sex-specific all-ages relative survival statistics from 2004 (the latest year with 10-year survival available). The proportion of the predicted GBD survival estimate to the SEER survival statistic was used to scale the SEER 10-year relative survival curve for each country (step 5).

To transform relative to absolute survival (adjusting for background mortality), GBD 2017 lifetables were used (step 6 and 7 in the flowchart) to calculate lambda values:  $\lambda = (\ln(nLx_n/nLx_{n+1}))/5$ , where

$nL_x$ =person years lived between ages  $x$  and  $x+n$  (from GBD lifetable). Absolute survival was then calculated using an exponential survival function (absolute survival = relative survival \*  $e^{\lambda t}$ ).

Survivors beyond 10 years were considered cured. The survivor population prevalence was divided into two sequelae (1. diagnosis and primary therapy; 2. controlled phase). The yearly prevalence of the population that did not survive beyond 10 years was divided into the four sequelae by assigning the fixed durations for each of the diagnosis and primary therapy phase, metastatic phase, and terminal phase, and assigning the remaining prevalence to the controlled phase (step 9 in the flowchart). Duration of these four sequelae remained the same as for GBD 2016. eTable 12 lists the duration of each, along with the sources used to determine their length. YLDs were calculated by multiplying each phase with the respective disability weight (eTable 13). To generate the total YLDs for each cancer (with the exception of cancers where additional disability is added due to procedures – see next paragraph) the YLDs for each cancer sequela were added (step 13 in eFigure 2).

Additional disability was estimated for breast cancer (disability due to mastectomy), larynx cancer (disability due to laryngectomy), colon and rectum cancer (disability due to stoma), bladder cancer (disability due to incontinence), and prostatectomy (disability due to incontinence and impotence) (#10 in eFigure 2). Hospital data were used to estimate the number of cancer patients undergoing mastectomy, laryngectomy, stoma, prostatectomy, and cystectomy. These proportions remained the same as in GBD 2013, GBD 2015, and GBD 2016 and were used as input for proportion models that were run in DisMod-MR 2.1 (#9 in eFigure 2).<sup>24</sup> The procedure proportion (proportion of cancer population that undergoes procedures) from hospital data was used as input for a proportion model in DisMod-MR 2.1 in order to estimate the proportions for all locations, by age, and by sex.

Since colostomy or ileostomy procedures are done for reasons other than cancer, a literature review was done to determine the proportion of ostomies due to colorectal cancer. The “all cause” colostomy proportions were multiplied by 0.58 based on the results of the literature review showing that on average 58% of ostomies are done for colorectal cancer.<sup>27–29</sup>

The final procedure proportions were applied to the incidence cases of the respective cancers and multiplied with the proportion of the incidence population surviving for 10 years to determine the incident cases of the cancer population that underwent procedures and that survived beyond 10 years. These incident cases were used again as an input for DisMod-MR 2.1, with a remission specification of zero and an excess mortality rate prior of 0 to 0.1, as well as with increasing the age of the population and the year by 10 years to reflect prevalence after that population has survived 10 years. This approach was updated compared to GBD 2016, where we did not include an age or time shift. The results from this model are incidence and lifetime prevalent cases of persons with these cancer-related sequelae who have survived beyond 10 years.

Since disability associated with prostatectomy comes from impotence and incontinence, and not from the prostatectomy itself, 18% of the prostatectomy prevalence was assumed to have incontinence and 55% was assumed to have impotence, based on a literature review done for GBD 2013.<sup>30–37</sup> Cases were assigned disability for either impotence or incontinence, but no cases were assigned disability from both.

We assumed that for the population surviving up to 10 years, only the prevalence population being in remission experiences additional disability due to procedures (e.g., a woman suffering from metastatic

breast cancer does not experience additional disability due to a mastectomy during this phase). To estimate the prevalence of the cancer population in remission during the first 10 years after diagnosis with and without procedure-related disability, we multiplied the prevalence of the population in the remission phase with the proportion of the population undergoing a procedure. This step allowed us to estimate disability during the remission phase for both the population experiencing disability due to the remission phase alone, as well as the population experiencing disability from the remission phase and the additional procedure-related disability.

Lastly, the procedure sequelae prevalence and general sequelae prevalence were multiplied with their respective disability weights (eTable 13) to obtain the number of YLDs (steps 11, 12, 13 in the flowchart). The sum of these YLDs is the final YLD estimate associated with each cancer.

### Probability of cancer

The cumulative probability of developing cancer for certain age groups and an approximated lifetime risk for all cancer groups (age 0 to 79) as well as the odds of developing cancer for 2017 were calculated. The method use does not take into account competing risks of death. The cancer risk is approximated using the following formula<sup>38</sup>:

$$\text{Cumulative risk} = 1 - e^{-\text{cumulative rate}}$$

## Additional method summaries for NMSC, benign and in situ neoplasms, and myelodysplastic, myeloproliferative, and other hematological neoplasms

### Non-melanoma skin cancer (squamous and basal cell carcinoma)

#### Case definition

Non-melanoma skin cancer (NMSC) is defined as basal cell carcinoma and squamous cell carcinoma. NMSC does not include other types of skin cancer (e.g., melanoma, Merkel cell carcinoma).

#### Input data

We estimated squamous cell and basal cell skin cancer incidence by using cancer registry as well as primary literature and MarketScan data for incidence. Only cancer registries that were listed in CI5 VIII as registering squamous cell carcinoma or basal cell carcinoma, respectively, were included in the analysis.

#### Modeling strategy

For cancer registry data reported at the three-digit level (i.e., C44: Other and unspecified malignant neoplasm of skin), proportions from Karagas et al were used to split C44 into squamous cell carcinoma and basal cell carcinoma.<sup>39</sup> The only new data we added compared to GBD 2015 were MarketScan data. DisMod-MR 2.1 was used to model incidence and prevalence. Prevalence was calculated as function of two extreme scenarios (duration 1 versus 5 years). Country-, age-, sex-, and year-specific duration was estimated using a country-age-sex-year-specific relative access-to-care-score.

The access to care score was based on the melanoma mortality to incidence ratio:

$$\text{Access to care} = 1 - \frac{\text{Age standardized } MIR_{cys} - \text{Age standardized } MIR_{min}}{\text{Age standardized } MIR_{max} - \text{Age standardized } MIR_{min}}$$

c=country; y=year; s=sex; Age-standardized MI ratio<sub>min</sub>=lowest MIR for all countries and years; Age standardized MIR<sub>max</sub>=highest MIR for all countries and years

Remission was calculated as the inverse of the duration estimates and used as additional input for DisMod-MR 2.1.

To reflect differing degrees of disability due to squamous cell carcinoma, we used three levels of severity that were derived from MEPS (Medical Expenditure Panel Survey). Prevalence was multiplied by distinct disability weights (eTable 13) to generate YLDs.

### Myelodysplastic, myeloproliferative, and other hematological neoplasms

#### Case definition

For GBD 2017 we newly estimated the myelodysplastic, myeloproliferative, and other hematological neoplasms (MDS/MPN). While these neoplasms comprise a wide variety of diseases and outcomes, we have modeled them together as a single group for 2017.

### Input data

We estimated MDS/MPN deaths using vital registration data (as outlined above). We did not use cancer registry data for these neoplasms, as it has only been reported within cancer registries since 2001 and is recognized to be underreported.<sup>40</sup> We estimated MDS/MPN prevalence using MarketScan claims data from the United States in the years 2000, 2010, and 2012, as well as hospital and outpatient data from other health systems worldwide.

### Modeling strategy

We modeled deaths for all locations and years, by age and by sex, using CODEm. As MDS/MPN can be a precursor to leukemia, our MDS/MPN CODEm model used the same covariates as the CODEm model for acute myeloid leukemia.

We modeled the prevalence of these diseases for all locations, by age, year, and by sex using a prevalence model in DisMod-MR 2.1. Each of the MarketScan 2000, 2010, and hospital data sources were crosswalked to the 2012 MarketScan data. For DisMod model specifications, cause-specific mortality rates came from the CODEm model, remission was specified to be zero, and the excess mortality rate was set to be inversely related to the Healthcare Access and Quality index covariate.

While this broad category of hematological neoplasms is heterogeneous in its components' severity or propensity for transformation to leukemia, modeling these components separately was not feasible for 2017. This is an admitted limitation, and an area of desired future improvement as data availability improves. For GBD 2017, the generic medication disability weight was assigned for all MDS/MPN cases.

## Benign and in situ intestinal neoplasms; benign and in situ cervical and uterine neoplasms; other benign and in situ neoplasms

### Case definition

For GBD 2017 we newly estimated three categories of benign and in-situ neoplasms: intestinal neoplasms; cervical and uterine neoplasms; and other neoplasms. Benign and in situ intestinal neoplasms were defined as any diagnosed non-invasive intestinal growth. Benign and in situ cervical and uterine neoplasms were defined as any non-invasive cervical and uterine growth, except for uterine fibroids. Other benign and in situ neoplasms were defined as any non-invasive neoplasms not covered by other causes.

### Input data

To estimate the prevalence of each of these categories for all locations, by age, year, and sex, the prevalence of these neoplasms from hospital data was used as input for a prevalence model in DisMod-MR 2.1. These inputs included MarketScan claims data from the United States in the years 2000, 2010, and 2012, as well as hospital and outpatient data from other health systems worldwide. Each of these data sources were crosswalked to the 2012 MarketScan data.

### Modeling strategy

In the DisMod model, excess mortality rate was specified to be zero, and remission was allowed to vary from 0 to 1. For benign and in situ cervical and uterine neoplasms, in the DisMod model, excess mortality rate was specified to be zero, and remission was allowed to vary from 0 to 0.75. For other



benign and in situ neoplasms, in the DisMod model, excess mortality rate was specified to be zero, and remission was allowed to vary from 0 to 1.

All three of these benign and in-situ neoplasms are by definition benign, localized, and not malignant. As such, no deaths or disability were attributed to their occurrence in GBD 2017.

## References

1. Stanaway JD, Afshin A, Gakidou E, et al. Global, regional, and national comparative risk assessment of 84 behavioural, environmental and occupational, and metabolic risks or clusters of risks for 195 countries and territories, 1990–2017: a systematic analysis for the Global Burden of Disease Study 2017. *The Lancet*. 2018;392(10159):1923-1994. doi:10.1016/S0140-6736(18)32225-6
2. Roth GA, Abate D, Abate KH, et al. Global, regional, and national age-sex-specific mortality for 282 causes of death in 195 countries and territories, 1980–2017: a systematic analysis for the Global Burden of Disease Study 2017. *The Lancet*. 2018;392(10159):1736-1788. doi:10.1016/S0140-6736(18)32203-7
3. Kyu HH, Abate D, Abate KH, et al. Global, regional, and national disability-adjusted life-years (DALYs) for 359 diseases and injuries and healthy life expectancy (HALE) for 195 countries and territories, 1990–2017: a systematic analysis for the Global Burden of Disease Study 2017. *The Lancet*. 2018;392(10159):1859-1922. doi:10.1016/S0140-6736(18)32335-3
4. James SL, Abate D, Abate KH, et al. Global, regional, and national incidence, prevalence, and years lived with disability for 354 diseases and injuries for 195 countries and territories, 1990–2017: a systematic analysis for the Global Burden of Disease Study 2017. *The Lancet*. 2018;392(10159):1789-1858. doi:10.1016/S0140-6736(18)32279-7
5. Dicker D, Nguyen G, Abate D, et al. Global, regional, and national age-sex-specific mortality and life expectancy, 1950–2017: a systematic analysis for the Global Burden of Disease Study 2017. *The Lancet*. 2018;392(10159):1684-1735. doi:10.1016/S0140-6736(18)31891-9
6. Doll R, Payne P, Waterhouse J. *Cancer Incidence in Five Continents I*. Geneva: Union Internationale Contre le Cancer; 1966.
7. Doll R, Muir C, Waterhouse J. *Cancer Incidence in Five Continents II*. Geneva: Union Internationale Contre le Cancer, Geneva; 1970.
8. Waterhouse J, Muir C, Correa P, Powell J. *Cancer Incidence in Five Continents III*. Lyon: IARC; 1976.
9. Waterhouse J, Muir C, Shanmugaratnam K, Powell J. *Cancer Incidence in Five Continents IV*. Lyon: IARC; 1982.
10. Muir C, Mack T, Powell J, Whelan S. *Cancer Incidence in Five Continents V*. Lyon: IARC; 1987.
11. Parkin D, Muir C, Whelan S, Gao Y, Ferlay J, Powell J. *Cancer Incidence in Five Continents VI*. Lyon: IARC; 1992.
12. Parkin D, Whelan S, Ferlay J, Raymond L, Young J. *Cancer Incidence in Five Continents VII*. Lyon: IARC; 1997.
13. Parkin D, Whelan S, Ferlay J, Teppo L, Thomas D. *Cancer Incidence in Five Continents VIII*. Lyon: IARC; 2002.

14. Curado M, Edwards B, Shin H, et al. *Cancer Incidence in Five Continents IX*. Lyon: IARC; 2007. <http://www.iarc.fr/en/publications/pdfs-online/epi/sp160/CI5vol9-A.pdf>.
15. Forman D, Bray F, Brewster D, et al. *Cancer Incidence in Five Continents X*. <http://ci5.iarc.fr>. Published 2013.
16. Steliarova-Foucher E, O'Callaghan M, Ferlay J, Masuyer E, Forman D, Comber H, Bray F. European Cancer Observatory: Cancer Incidence, Mortality, Prevalence and Survival in Europe. International Agency for Research on Cancer. <http://eco.iarc.fr>. Accessed August 10, 2016.
17. Engholm G, Ferlay J, Christensen N, et al. NordCAN--a Nordic tool for cancer information, planning, quality control and research. *Acta Oncol*. 2010;49(5):725-736. doi:10.3109/02841861003782017
18. Abajobir AA, Abbafati C, Abbas KM, et al. Global, regional, and national age-sex specific mortality for 264 causes of death, 1980–2016: a systematic analysis for the Global Burden of Disease Study 2016. *The Lancet*. 2017;390(10100):1151-1210. doi:10.1016/S0140-6736(17)32152-9
19. GBD 2013 Mortality and Causes of Death Collaborators. Global, regional, and national age–sex specific all-cause and cause-specific mortality for 240 causes of death, 1990–2013: a systematic analysis for the Global Burden of Disease Study 2013. *The Lancet*. December 2014. doi:10.1016/S0140-6736(14)61682-2
20. Barber RM, Fullman N, Sorensen RJD, et al. Healthcare Access and Quality Index based on mortality from causes amenable to personal health care in 195 countries and territories, 1990–2015: a novel analysis from the Global Burden of Disease Study 2015. *The Lancet*. 2017;390(10091):231-266. doi:10.1016/S0140-6736(17)30818-8
21. Foreman KJ, Lozano R, Lopez AD, Murray CJ. Modeling causes of death: an integrated approach using CODEm. *Popul Health Metr*. 2012;10(1):1. doi:10.1186/1478-7954-10-1
22. de Martel C, Maucort-Boulch D, Plummer M, Franceschi S. World-wide relative contribution of hepatitis B and C viruses in hepatocellular carcinoma. *Hepatology*. 2015;62(4):1190-1200. doi:10.1002/hep.27969
23. Hong TP, Gow P, Fink M, et al. Novel population-based study finding higher than reported hepatocellular carcinoma incidence suggests an updated approach is needed. *Hepatology*. 2016;63(4):1205-1212. doi:10.1002/hep.28267
24. Asadzadeh Vostakolaei F, Karim-Kos HE, Janssen-Heijnen MLG, Visser O, Verbeek ALM, Kiemeney LALM. The validity of the mortality to incidence ratio as a proxy for site-specific cancer survival. *Eur J Public Health*. 2011;21(5):573-577. doi:10.1093/eurpub/ckq120
25. Flaxman AD, Vos T, Murray C. *An Integrative MetaRegression Framework for Descriptive Epidemiology*. University of Washington Press; 2015.
26. Fitzmaurice C, Dicker D, Pain A, et al. The Global Burden of Cancer 2013. *JAMA Oncol*. May 2015. doi:10.1001/jamaoncol.2015.0735

27. Canova C, Giorato E, Roveron G, Turrini P, Zanotti R. Validation of a stoma-specific quality of life questionnaire in a sample of patients with colostomy or ileostomy. *Colorectal Dis Off J Assoc Coloproctology G B Irel.* 2013;15(11):e692-698. doi:10.1111/codi.12324
28. Caricato M, Ausania F, Ripetti V, Bartolozzi F, Campoli G, Coppola R. Retrospective analysis of long-term defunctioning stoma complications after colorectal surgery. *Colorectal Dis Off J Assoc Coloproctology G B Irel.* 2007;9(6):559-561. doi:10.1111/j.1463-1318.2006.01187.x
29. Erwin-Toth P, Thompson SJ, Davis JS. Factors impacting the quality of life of people with an ostomy in North America: results from the Dialogue Study. *J Wound Ostomy Cont Nurs Off Publ Wound Ostomy Cont Nurses Soc WOCN.* 2012;39(4):417-422; quiz 423-424. doi:10.1097/WON.0b013e318259c441
30. Catalona WJ, Carvalhal GF, Mager DE, Smith DS. Potency, continence and complication rates in 1,870 consecutive radical retropubic prostatectomies. *J Urol.* 1999;162(2):433-438.
31. Donnellan SM, Duncan HJ, MacGregor RJ, Russell JM. Prospective assessment of incontinence after radical retropubic prostatectomy: objective and subjective analysis. *Urology.* 1997;49(2):225-230. doi:10.1016/S0090-4295(96)00451-7
32. Eastham JA, Kattan MW, Rogers E, et al. Risk factors for urinary incontinence after radical prostatectomy. *J Urol.* 1996;156(5):1707-1713.
33. Kundu SD, Roehl KA, Eggener SE, Antenor JAV, Han M, Catalona WJ. Potency, continence and complications in 3,477 consecutive radical retropubic prostatectomies. *J Urol.* 2004;172(6 Pt 1):2227-2231.
34. Potosky AL, Davis WW, Hoffman RM, et al. Five-Year Outcomes After Prostatectomy or Radiotherapy for Prostate Cancer: The Prostate Cancer Outcomes Study. *JNCI J Natl Cancer Inst.* 2004;96(18):1358-1367. doi:10.1093/jnci/djh259
35. Sacco E, Prayer-Galetti T, Pinto F, et al. Urinary incontinence after radical prostatectomy: incidence by definition, risk factors and temporal trend in a large series with a long-term follow-up. *BJU Int.* 2006;97(6):1234-1241. doi:10.1111/j.1464-410X.2006.06185.x
36. Stanford JL, Feng Z, Hamilton AS, et al. Urinary and sexual function after radical prostatectomy for clinically localized prostate cancer: the Prostate Cancer Outcomes Study. *JAMA.* 2000;283(3):354-360.
37. Walsh PC, Marschke P, Ricker D, Burnett AL. Patient-reported urinary continence and sexual function after anatomic radical prostatectomy. *Urology.* 2000;55(1):58-61.
38. Esteve J, Benhamou E, Raymond L. *Descriptive Epidemiology.* Vol VI. IARC Scientific Publications No.128. Lyon, France: IARC Publications; 1994.
39. Karagas MR, Greenberg ER, Spencer SK, Stukel TA, Mott LA. Increase in incidence rates of basal cell and squamous cell skin cancer in New Hampshire, USA. New Hampshire Skin Cancer Study Group. *Int J Cancer J Int Cancer.* 1999;81(4):555-559.

40. Cogle CR, Craig BM, Rollison DE, List AF. Incidence of the myelodysplastic syndromes using a novel claims-based algorithm: high number of uncaptured cases by cancer registries. *Blood*. 2011;117(26):7121-7125. doi:10.1182/blood-2011-02-337964
41. Neal RD, Din NU, Hamilton W, et al. Comparison of cancer diagnostic intervals before and after implementation of NICE guidelines: analysis of data from the UK General Practice Research Database. *Br J Cancer*. 2014;110(3):584-592. doi:10.1038/bjc.2013.791
42. *Surveillance, Epidemiology, and End Results (SEER) Program (Www.Seer.Cancer.Gov) SEER\*Stat Database: Incidence - SEER 18 Regs Research Data + Hurricane Katrina Impacted Louisiana Cases, Nov 2012 Sub (1973-2010 Varying) - Linked To County Attributes - Total U.S., 1969-2011 Counties, National Cancer Institute, DCCPS, Surveillance Research Program, Surveillance Systems Branch, Released April 2013, Based on the November 2012 Submission.*
43. Allgar VL, Neal RD. Delays in the diagnosis of six cancers: analysis of data from the National Survey of NHS Patients: Cancer. *Br J Cancer*. 2005;92(11):1959-1970. doi:10.1038/sj.bjc.6602587
44. Neal RD, Cannings-John R, Hood K, et al. Excision of malignant melanomas in North Wales: effect of location and surgeon on time to diagnosis and quality of excision. *Fam Pract*. 2008;25(4):221-227. doi:10.1093/fampra/cmn036
45. Nolan RC, Chan MT-L, Heenan PJ. A clinicopathologic review of lethal nonmelanoma skin cancers in Western Australia. *J Am Acad Dermatol*. 2005;52(1):101-108. doi:10.1016/j.jaad.2004.08.016
46. Kewalramani T, Nimer SD, Zelenetz AD, et al. Progressive disease following autologous transplantation in patients with chemosensitive relapsed or primary refractory Hodgkin's disease or aggressive non-Hodgkin's lymphoma. *Bone Marrow Transplant*. 2003;32(7):673-679. doi:10.1038/sj.bmt.1704214
47. Esteban D, Tovar N, Jiménez R, et al. Patients with relapsed/refractory chronic lymphocytic leukaemia may benefit from inclusion in clinical trials irrespective of the therapy received: a case-control retrospective analysis. *Blood Cancer J*. 2015;5:e356. doi:10.1038/bcj.2015.78

## Supplementary Tables and Figures

eTable 1: GATHER guidelines checklist

| <b>Objectives and Funding</b>                                                                                                                                                                                                                                                                                                                                                                | <b>Reported in the Manuscript and Appendix</b>                                                                      |
|----------------------------------------------------------------------------------------------------------------------------------------------------------------------------------------------------------------------------------------------------------------------------------------------------------------------------------------------------------------------------------------------|---------------------------------------------------------------------------------------------------------------------|
| 1. Define the indicator(s), populations (including age, sex, and geographic entities), and time period(s) for which estimates were made.                                                                                                                                                                                                                                                     | Appendix: "Definition of indicator"                                                                                 |
| 2. List the funding sources for the work.                                                                                                                                                                                                                                                                                                                                                    | See main manuscript                                                                                                 |
| <b>Data Inputs</b>                                                                                                                                                                                                                                                                                                                                                                           |                                                                                                                     |
| <b>For all data inputs from multiple sources that are synthesized as part of the study:</b>                                                                                                                                                                                                                                                                                                  |                                                                                                                     |
| 3. Describe how the data were identified and how the data were accessed.                                                                                                                                                                                                                                                                                                                     | Appendix: "Data sources"                                                                                            |
| 4. Specify the inclusion and exclusion criteria. Identify all ad-hoc exclusions.                                                                                                                                                                                                                                                                                                             | Appendix: "Data sources"                                                                                            |
| 5. Provide information about all included data sources and their main characteristics. For each data source used, report reference information or contact name/institution, population represented, data collection method, year(s) of data collection, sex and age range, diagnostic criteria or measurement method, and sample size, as relevant.                                          | <a href="http://ghdx.healthdata.org/gbd-2017">http://ghdx.healthdata.org/gbd-2017</a>                               |
| 6. Identify and describe any categories of input data that have potentially important biases (e.g., based on characteristics listed in item 5).                                                                                                                                                                                                                                              | Appendix: "Bias of categories of input data"                                                                        |
| <b>For data inputs that contribute to the analysis but were not synthesized as part of the study:</b>                                                                                                                                                                                                                                                                                        |                                                                                                                     |
| 7. Describe and give sources for any other data inputs.                                                                                                                                                                                                                                                                                                                                      | <a href="http://ghdx.healthdata.org/gbd-2017">http://ghdx.healthdata.org/gbd-2017</a>                               |
| <b>For all data inputs:</b>                                                                                                                                                                                                                                                                                                                                                                  |                                                                                                                     |
| 8. Provide all data inputs in a file format from which data can be efficiently extracted (e.g., a spreadsheet rather than a PDF), including all relevant meta-data listed in item 5. For any data inputs that cannot be shared because of ethical or legal reasons, such as third-party ownership, provide a contact name or the name of the institution that retains the right to the data. | <a href="http://ghdx.healthdata.org/gbd-2017">http://ghdx.healthdata.org/gbd-2017</a>                               |
| <b>DATA ANALYSIS</b>                                                                                                                                                                                                                                                                                                                                                                         |                                                                                                                     |
| 9. Provide a conceptual overview of the data analysis method. A diagram may be helpful.                                                                                                                                                                                                                                                                                                      | <ul style="list-style-type: none"> <li>Appendix Figure 1: Flowchart GBD cancer mortality, YLL estimation</li> </ul> |

|                                                                                                                                                                                                                                                                             |                                                                                                                                                                                                                                                            |
|-----------------------------------------------------------------------------------------------------------------------------------------------------------------------------------------------------------------------------------------------------------------------------|------------------------------------------------------------------------------------------------------------------------------------------------------------------------------------------------------------------------------------------------------------|
|                                                                                                                                                                                                                                                                             | <ul style="list-style-type: none"> <li>Appendix Figure 2: Flowchart GBD cancer incidence, prevalence, YLD estimation</li> </ul>                                                                                                                            |
| 10. Provide a detailed description of all steps of the analysis, including mathematical formulae. This description should cover, as relevant, data cleaning, data pre-processing, data adjustments and weighting of data sources, and mathematical or statistical model(s). | Appendix: "Data Analysis"                                                                                                                                                                                                                                  |
| 11. Describe how candidate models were evaluated and how the final model(s) were selected.                                                                                                                                                                                  | CODEm models <sup>3</sup> ; see Appendix Table 3: GBD 2017 covariates and level of covariates used in cause of death modeling for cancer types estimated                                                                                                   |
| 12. Provide the results of an evaluation of model performance, if done, as well as the results of any relevant sensitivity analysis.                                                                                                                                        | See SR Figure 5 on p 20 of Supplement 2 to "Global, regional, and national age-sex-specific mortality for 282 causes of death in 195 countries and territories, 1980-2017: a systematic analysis for the Global Burden of Disease Study 2017" <sup>4</sup> |
| 13. Describe methods of calculating uncertainty of the estimates. State which sources of uncertainty were, and were not, accounted for in the uncertainty analysis.                                                                                                         | Appendix: "Data Analysis"                                                                                                                                                                                                                                  |
| 14. State how analytic or statistical source code used to generate estimates can be accessed.                                                                                                                                                                               | <a href="http://ghdx.healthdata.org/gbd-2017/code">http://ghdx.healthdata.org/gbd-2017/code</a>                                                                                                                                                            |
| <b>RESULTS AND DISCUSSION</b>                                                                                                                                                                                                                                               |                                                                                                                                                                                                                                                            |
| 15. Provide published estimates in a file format from which data can be efficiently extracted.                                                                                                                                                                              | GBD 2017 estimates are available online ( <a href="http://vizhub.healthdata.org/gbd-compare">http://vizhub.healthdata.org/gbd-compare</a> and <a href="http://ghdx.healthdata.org/gbd-results-tool">http://ghdx.healthdata.org/gbd-results-tool</a> )      |
| 16. Report a quantitative measure of the uncertainty of the estimates (e.g., uncertainty intervals).                                                                                                                                                                        | See main manuscript "Results"                                                                                                                                                                                                                              |
| 17. Interpret results in light of existing evidence. If updating a previous set of estimates, describe the reasons for changes in estimates.                                                                                                                                | See main manuscript "Discussion"                                                                                                                                                                                                                           |
| 18. Discuss limitations of the estimates. Include a discussion of any modelling assumptions or data limitations that affect interpretation of the estimates.                                                                                                                | See main manuscript "Discussion"                                                                                                                                                                                                                           |

*eTable 2: Sources for cancer incidence and mortality-to-incidence ratio data by country, year, and registry*

| Location              | Registry                | Years available from registry | Years used for incidence | Years available for MI ratio | Years used for MI ratio |
|-----------------------|-------------------------|-------------------------------|--------------------------|------------------------------|-------------------------|
| Algeria               | Algiers                 | 1993-1997                     | 5                        | 1993-1997                    | 0                       |
| Algeria               | Batna                   | 2000-2012                     | 13                       | 2000-2012                    | 0                       |
| Algeria               | Oran                    | 2005-2006                     | 2                        | 2005-2006                    | 0                       |
| Algeria               | Setif                   | 1986-2011                     | 26                       | 1986-2011                    | 0                       |
| Antilles except Aruba | Antilles except Aruba   | 1973-1982                     | 10                       | 1973-1982                    | 0                       |
| Argentina             | Bahia Blanca            | 1993-2007                     | 15                       | 1993-2007                    | 0                       |
| Argentina             | Concordia               | 1990-1997                     | 8                        | 1990-1997                    | 0                       |
| Argentina             | Cordoba                 | 2003-2012                     | 9                        | 2004-2012                    | 0                       |
| Argentina             | Mendoza                 | 2003-2012                     | 10                       | 2003-2012                    | 0                       |
| Argentina             | Tierra del Fuego        | 2003-2012                     | 10                       | 2003-2012                    | 0                       |
| Australia             | Capital Territory       | 1978-2007                     | 25                       | 1983-2007                    | 0                       |
| Australia             | National Registry       | 1982-2014                     | 33                       | 1968-2014                    | 26                      |
| Australia             | New South Wales         | 1973-2012                     | 30                       | 1983-2012                    | 0                       |
| Australia             | Northern Territory      | 1993-2012                     | 15                       | 1998-2012                    | 0                       |
| Australia             | Queensland              | 1982-2012                     | 20                       | 1993-2012                    | 0                       |
| Australia             | South Australia         | 1977-2012                     | 36                       | 1977-2012                    | 0                       |
| Australia             | Tasmania                | 1978-2012                     | 35                       | 1978-2012                    | 0                       |
| Australia             | Victoria                | 1982-2012                     | 30                       | 1983-2012                    | 0                       |
| Australia             | Western Australia       | 1982-2012                     | 30                       | 1983-2012                    | 0                       |
| Austria               | National Registry       | 1983-2012                     | 30                       | 1983-2012                    | 7                       |
| Austria               | Salzburg                | NA                            |                          | 1999-2006                    | 0                       |
| Austria               | Tyrol                   | 1988-2012                     | 25                       | 1988-2012                    | 0                       |
| Austria               | Vorarlberg              | 1993-2012                     | 20                       | 1993-2012                    | 0                       |
| Bahrain               | National Registry       | 1998-2007                     | 10                       | 1998-2007                    | 0                       |
| Belarus               | National Registry       | 1983-2012                     | 30                       | 1983-2012                    | 0                       |
| Belgium               | Antwerp                 | 1998-2002                     | 5                        | 1998-2002                    | 0                       |
| Belgium               | Flanders                | 1998-2001                     | 4                        | 1998-2001                    | 0                       |
| Belgium               | Flanders except Limburg | 1997-1998                     | 2                        | 1997-1998                    | 0                       |
| Belgium               | Limburg                 | 1997-1998                     | 2                        | 1997-1998                    | 0                       |
| Belgium               | National Registry       | 2003-2012                     | 10                       | 2003-2012                    | 0                       |
| Bermuda               | Bermuda                 | 1983-1987                     | 5                        | 1983-1987                    | 0                       |
| Brazil                | Aracaju                 | 1996-2013                     | 18                       | 1996-2013                    | 0                       |
| Brazil                | Barretos                | 2008-2013                     | 6                        | 2008-2013                    | 0                       |
| Brazil                | Belem                   | 1989-2012                     | 24                       | 1989-2012                    | 0                       |
| Brazil                | Belo Horizonte          | 2000-2011                     | 12                       | 2000-2011                    | 0                       |
| Brazil                | Brasilia                | 1998-2001                     | 4                        | 1998-2001                    | 0                       |



| Location | Registry                        | Years available from registry | Years used for incidence | Years available for MI ratio | Years used for MI ratio |
|----------|---------------------------------|-------------------------------|--------------------------|------------------------------|-------------------------|
| Brazil   | Campinas                        | 1991-2005                     | 15                       | 1991-2005                    | 0                       |
| Brazil   | Campo Grande                    | 2000-2010                     | 11                       | 2000-2010                    | 0                       |
| Brazil   | Cuiaba                          | 2000-2009                     | 10                       | 2000-2009                    | 0                       |
| Brazil   | Curitiba                        | 1998-2012                     | 15                       | 1998-2012                    | 0                       |
| Brazil   | Distrito Federal                | 1999-2002                     | 4                        | 1999-2002                    | 0                       |
| Brazil   | Espirito Santo                  | 1997-2012                     | 16                       | 1997-2012                    | 0                       |
| Brazil   | Florianopolis                   | 2008-2012                     | 5                        | 2008-2012                    | 0                       |
| Brazil   | Fortaleza                       | 1978-2009                     | 32                       | 1978-2009                    | 0                       |
| Brazil   | Goiania                         | 1988-2012                     | 25                       | 1988-2012                    | 0                       |
| Brazil   | Jahu                            | 1996-2015                     | 20                       | 1996-2015                    | 0                       |
| Brazil   | Joao Pessoa                     | 1999-2012                     | 14                       | 1999-2012                    | 0                       |
| Brazil   | Manaus                          | 1999-2009                     | 11                       | 1999-2009                    | 0                       |
| Brazil   | Mato Grosso Interior            | 2001-2005                     | 5                        | 2001-2005                    | 0                       |
| Brazil   | Natal                           | 1999-2005                     | 7                        | 1999-2005                    | 0                       |
| Brazil   | Palmas                          | 2000-2012                     | 13                       | 2000-2012                    | 0                       |
| Brazil   | Pocos de Caldas                 | 2007-2011                     | 5                        | 2007-2011                    | 0                       |
| Brazil   | Porto Alegre                    | 1979-2006                     | 28                       | 1979-2006                    | 0                       |
| Brazil   | Recife                          | 1968-2012                     | 45                       | 1968-2012                    | 0                       |
| Brazil   | Roraima                         | 2003-2010                     | 8                        | 2003-2010                    | 0                       |
| Brazil   | Salvador                        | 1996-2005                     | 10                       | 1996-2005                    | 0                       |
| Brazil   | Santos                          | 2008-2009                     | 2                        | 2008-2009                    | 0                       |
| Brazil   | Sao Paulo                       | 1969-2013                     | 45                       | 1969-2013                    | 0                       |
| Brazil   | Teresina                        | 2000-2006                     | 7                        | 2000-2006                    | 0                       |
| Bulgaria | National Registry               | 1993-2012                     | 20                       | 1993-2012                    | 12                      |
| Canada   | Alberta                         | 1960-2012                     | 53                       | 1960-2012                    | 0                       |
| Canada   | British Columbia                | 1969-2012                     | 44                       | 1969-2012                    | 0                       |
| Canada   | Manitoba                        | 1958-2012                     | 55                       | 1958-2012                    | 0                       |
| Canada   | Maritime                        | 1969-1987                     | 19                       | 1969-1987                    | 0                       |
| Canada   | National Registry               | 1978-2007                     | 30                       | 1978-2007                    | 0                       |
| Canada   | New Brunswick                   | 1962-2012                     | 51                       | 1962-2012                    | 0                       |
| Canada   | Newfoundland                    | 1969-2002                     | 34                       | 1969-2002                    | 0                       |
| Canada   | Newfoundland and Labrador       | 1960-2012                     | 53                       | 1960-2012                    | 0                       |
| Canada   | Northwest Territories           | 1983-2012                     | 30                       | 1983-2012                    | 0                       |
| Canada   | Northwest Territories and Yukon | 1973-1987                     | 15                       | 1973-1987                    | 0                       |
| Canada   | Nova Scotia                     | 1978-2012                     | 35                       | 1978-2012                    | 0                       |
| Canada   | Ontario                         | 1969-2012                     | 44                       | 1969-2012                    | 0                       |
| Canada   | Prince Edward Island            | 1978-2012                     | 35                       | 1978-2012                    | 0                       |
| Canada   | Quebec                          | 1963-2007                     | 45                       | 1963-2007                    | 0                       |

| Location | Registry                    | Years available from registry | Years used for incidence | Years available for MI ratio | Years used for MI ratio |
|----------|-----------------------------|-------------------------------|--------------------------|------------------------------|-------------------------|
| Canada   | Saskatchewan                | 1960-2012                     | 53                       | 1960-2012                    | 0                       |
| Canada   | Yukon                       | 1983-2012                     | 30                       | 1983-2012                    | 0                       |
| Chile    | Antofagasta                 | 2003-2010                     | 8                        | 2003-2010                    | 0                       |
| Chile    | Bio Bio                     | 2003-2012                     | 10                       | 2003-2012                    | 0                       |
| Chile    | Los Rios                    | 2003-2007                     | 5                        | 2003-2007                    | 0                       |
| Chile    | National Registry           | 1959-1961                     | 3                        | 1959-1961                    | 0                       |
| Chile    | Valdivia                    | 1998-2012                     | 15                       | 1998-2012                    | 0                       |
| China    | Anshan                      | 1998-2012                     | 15                       | 1998-2012                    | 13                      |
| China    | Baoding                     | 2009-2011                     | 3                        | 2009-2011                    | 2                       |
| China    | Beijing                     | 1990-2012                     | 23                       | 1990-2012                    | 21                      |
| China    | Beijing Rural Areas         | 2011                          | 1                        | 2011                         | 1                       |
| China    | Beiliu                      | 2011                          | 1                        | 2011                         | 1                       |
| China    | Bengbu                      | 2011                          | 1                        | 2011                         | 1                       |
| China    | Benxi                       | 2003-2011                     | 9                        | 2003-2011                    | 8                       |
| China    | Bijiang District, Tongren   | 2011                          | 1                        | 2011                         | 1                       |
| China    | Bincheng District, Binzhou  | 2011                          | 1                        | 2011                         | 1                       |
| China    | Binghai                     | 2011                          | 1                        | 2011                         | 1                       |
| China    | Boli                        | 2011                          | 1                        | 2011                         | 1                       |
| China    | Cangwu                      | 2011                          | 1                        | 2011                         | 1                       |
| China    | Cangzhou                    | 2011                          | 1                        | 2011                         | 1                       |
| China    | Changfeng                   | 2011                          | 1                        | 2011                         | 1                       |
| China    | Changle                     | 1990-2011                     | 22                       | 1990-2011                    | 21                      |
| China    | Changle                     | 2006-2007                     | 4                        | 2004-2007                    | 0                       |
| China    | Changning                   | 2011                          | 1                        | 2011                         | 1                       |
| China    | Changzhou                   | 2011                          | 1                        | 2011                         | 1                       |
| China    | Chifeng                     | 2009-2011                     | 3                        | 2009-2011                    | 2                       |
| China    | Chuzhou District, Huai'an   | 2004-2007                     | 4                        | 2004-2007                    | 0                       |
| China    | Ci County                   | 1990-2012                     | 23                       | 1990-2012                    | 12                      |
| China    | Cili                        | 2011                          | 1                        | 2011                         | 1                       |
| China    | Cixi                        | 2011                          | 1                        | 2011                         | 1                       |
| China    | Cixian                      | 2011                          | 1                        | 2011                         | 1                       |
| China    | Daan                        | 2011                          | 1                        | 2011                         | 1                       |
| China    | Dafeng                      | 2003-2011                     | 9                        | 2003-2011                    | 8                       |
| China    | Dalian City                 | 1998-2011                     | 14                       | 1998-2011                    | 13                      |
| China    | Dancheng                    | 2011                          | 1                        | 2011                         | 1                       |
| China    | Dandong                     | 2008-2011                     | 4                        | 2008-2011                    | 3                       |
| China    | Daoli District, Harbin City | 2005-2011                     | 7                        | 2005-2011                    | 6                       |
| China    | Dawukou                     | 2011                          | 1                        | 2011                         | 1                       |
| China    | Dazhu                       | 2011                          | 1                        | 2011                         | 1                       |

| Location | Registry                                         | Years available from registry | Years used for incidence | Years available for MI ratio | Years used for MI ratio |
|----------|--------------------------------------------------|-------------------------------|--------------------------|------------------------------|-------------------------|
| China    | Decheng District, Dezhou                         | 2011                          | 1                        | 2011                         | 1                       |
| China    | Dehui                                            | 2009-2011                     | 3                        | 2009-2011                    | 2                       |
| China    | Dingan                                           | 2011                          | 1                        | 2011                         | 1                       |
| China    | Donggang                                         | 2009-2011                     | 3                        | 2009-2011                    | 2                       |
| China    | Donghai County                                   | 2004-2011                     | 8                        | 2004-2011                    | 2                       |
| China    | Dunhuang                                         | 2011                          | 1                        | 2011                         | 1                       |
| China    | Faku                                             | 2011                          | 1                        | 2011                         | 1                       |
| China    | Feicheng                                         | 1998-2011                     | 14                       | 1998-2011                    | 13                      |
| China    | Feidong                                          | 2011                          | 1                        | 2011                         | 1                       |
| China    | Feixi County                                     | 2009-2011                     | 3                        | 2009-2011                    | 2                       |
| China    | Fusui County                                     | 1990-2011                     | 22                       | 1990-2011                    | 8                       |
| China    | Fuyuan                                           | 2011                          | 1                        | 2011                         | 1                       |
| China    | Ganyu                                            | 2004-2011                     | 8                        | 2004-2011                    | 1                       |
| China    | Ganzhou District, Zhangye                        | 2011                          | 1                        | 2011                         | 1                       |
| China    | Gaomi                                            | 2011                          | 1                        | 2011                         | 1                       |
| China    | Gaotang                                          | 2011                          | 1                        | 2011                         | 1                       |
| China    | Gejiu                                            | 2004-2011                     | 8                        | 2004-2011                    | 2                       |
| China    | Gongan                                           | 2011                          | 1                        | 2011                         | 1                       |
| China    | Guangrao                                         | 2011                          | 1                        | 2011                         | 1                       |
| China    | Guangzhou City                                   | 2000-2012                     | 13                       | 2000-2012                    | 11                      |
| China    | Guannan                                          | 2011                          | 1                        | 2011                         | 1                       |
| China    | Guanyun County                                   | 2004-2012                     | 9                        | 2004-2012                    | 3                       |
| China    | Guilin                                           | 2011                          | 1                        | 2011                         | 1                       |
| China    | Guyuan                                           | 2011                          | 1                        | 2011                         | 1                       |
| China    | Hai'an County                                    | 2009-2011                     | 3                        | 2009-2011                    | 2                       |
| China    | Haimen                                           | 2003-2012                     | 10                       | 2003-2012                    | 8                       |
| China    | Hainan                                           | 2011                          | 1                        | 2011                         | 1                       |
| China    | Haining                                          | 1998-2011                     | 14                       | 1998-2011                    | 13                      |
| China    | Hangzhou City                                    | 2000-2012                     | 13                       | 2000-2012                    | 11                      |
| China    | Hanjiang District, Putian                        | 2011                          | 1                        | 2011                         | 1                       |
| China    | Hefei                                            | 2010-2012                     | 3                        | 2010-2012                    | 1                       |
| China    | Hengdong County                                  | 2009-2012                     | 4                        | 2009-2012                    | 2                       |
| China    | Hepu                                             | 2011                          | 1                        | 2011                         | 1                       |
| China    | Hetian                                           | 2011                          | 1                        | 2011                         | 1                       |
| China    | Hong Kong Special Administrative Region of China | 1974-2013                     | 40                       | 1974-2013                    | 8                       |
| China    | Hongta District, Yuxi                            | 2011                          | 1                        | 2011                         | 1                       |
| China    | Hongtong                                         | 2011                          | 1                        | 2011                         | 1                       |

| Location | Registry                      | Years available from registry | Years used for incidence | Years available for MI ratio | Years used for MI ratio |
|----------|-------------------------------|-------------------------------|--------------------------|------------------------------|-------------------------|
| China    | Hongze                        | 2011                          | 1                        | 2011                         | 1                       |
| China    | Huai'an District, Huai'an     | 1998-2009                     | 12                       | 1998-2009                    | 12                      |
| China    | Huaiyin District, Huai'an     | 2009-2012                     | 4                        | 2009-2012                    | 2                       |
| China    | Huangdao District, Qingdao    | 2011                          | 1                        | 2011                         | 1                       |
| China    | Huian                         | 2011                          | 1                        | 2011                         | 1                       |
| China    | Huichuan District, Zunyi      | 2011                          | 1                        | 2011                         | 1                       |
| China    | Huinong                       | 2011                          | 1                        | 2011                         | 1                       |
| China    | Huixian                       | 2011                          | 1                        | 2011                         | 1                       |
| China    | Huzhu                         | 2011                          | 1                        | 2011                         | 1                       |
| China    | Jiangmen                      | 2010-2012                     | 3                        | 2010-2012                    | 1                       |
| China    | Jianhu County                 | 2003-2012                     | 10                       | 2003-2012                    | 8                       |
| China    | Jianou                        | 2011                          | 1                        | 2011                         | 1                       |
| China    | Jianping                      | 2011                          | 1                        | 2011                         | 1                       |
| China    | Jiashan County                | 1990-2012                     | 23                       | 1990-2012                    | 21                      |
| China    | Jiaxing                       | 2000-2012                     | 13                       | 2000-2012                    | 11                      |
| China    | Jilin                         | 2011                          | 1                        | 2011                         | 1                       |
| China    | Jinan                         | 2011                          | 1                        | 2011                         | 1                       |
| China    | Jingan                        | 2011                          | 1                        | 2011                         | 1                       |
| China    | Jingtai County                | 2009-2011                     | 3                        | 2009-2011                    | 2                       |
| China    | Jingxian                      | 2011                          | 1                        | 2011                         | 1                       |
| China    | Jingyang                      | 2011                          | 1                        | 2011                         | 1                       |
| China    | Jinhu County                  | 2007-2011                     | 5                        | 2007-2011                    | 4                       |
| China    | Jintan District               | 2003-2011                     | 9                        | 2003-2011                    | 7                       |
| China    | Jinzhai                       | 2011                          | 1                        | 2011                         | 1                       |
| China    | Jiulongpo District, Chongqing | 2004-2011                     | 8                        | 2004-2011                    | 4                       |
| China    | Jiyuan                        | 2011                          | 1                        | 2011                         | 1                       |
| China    | Junan                         | 2011                          | 1                        | 2011                         | 1                       |
| China    | Kaihua                        | 2011                          | 1                        | 2011                         | 1                       |
| China    | Kailu                         | 2011                          | 1                        | 2011                         | 1                       |
| China    | Kaiyang                       | 2011                          | 1                        | 2011                         | 1                       |
| China    | Kangping                      | 2011                          | 1                        | 2011                         | 1                       |
| China    | Kunes County                  | 2009                          | 1                        | 2009                         | 1                       |
| China    | Lanping                       | 2011                          | 1                        | 2011                         | 1                       |
| China    | Lanzhou                       | 2011                          | 1                        | 2011                         | 1                       |
| China    | Leishan                       | 2011                          | 1                        | 2011                         | 1                       |
| China    | Leshan                        | 2011                          | 1                        | 2011                         | 1                       |
| China    | Lhasa                         | 2011                          | 1                        | 2011                         | 1                       |
| China    | Liangzhou District            | 2008-2011                     | 4                        | 2008-2011                    | 3                       |

| Location | Registry                                     | Years available from registry | Years used for incidence | Years available for MI ratio | Years used for MI ratio |
|----------|----------------------------------------------|-------------------------------|--------------------------|------------------------------|-------------------------|
| China    | Lianhu District, Xi'an                       | 2011                          | 1                        | 2011                         | 1                       |
| China    | Lianshui                                     | 2011                          | 1                        | 2011                         | 1                       |
| China    | Lianyungang                                  | 2004-2012                     | 9                        | 2004-2012                    | 4                       |
| China    | Lingbi                                       | 2011                          | 1                        | 2011                         | 1                       |
| China    | Linhe District, Bayannaer                    | 2011                          | 1                        | 2011                         | 1                       |
| China    | Linqu County                                 | 1998-2011                     | 14                       | 1998-2011                    | 13                      |
| China    | Lintan                                       | 2011                          | 1                        | 2011                         | 1                       |
| China    | Linxian                                      | 2011                          | 1                        | 2011                         | 1                       |
| China    | Linzhou                                      | 1990-2012                     | 23                       | 1990-2012                    | 21                      |
| China    | Liuzhou                                      | 2009-2012                     | 4                        | 2009-2012                    | 2                       |
| China    | Liyang                                       | 2011                          | 1                        | 2011                         | 1                       |
| China    | Longnan                                      | 2011                          | 1                        | 2011                         | 1                       |
| China    | Longquanyi District, Chengdu                 | 2011                          | 1                        | 2011                         | 1                       |
| China    | Lujiang                                      | 2011                          | 1                        | 2011                         | 1                       |
| China    | Luoshan                                      | 2011                          | 1                        | 2011                         | 1                       |
| China    | Luoyang                                      | 2011                          | 1                        | 2011                         | 1                       |
| China    | Lushan                                       | 2011                          | 1                        | 2011                         | 1                       |
| China    | Ma'anshan                                    | 2003-2012                     | 10                       | 2003-2012                    | 8                       |
| China    | Macao Special Administrative Region of China | 2003-2007                     | 5                        | 2003-2007                    | 0                       |
| China    | Macheng                                      | 2011                          | 1                        | 2011                         | 1                       |
| China    | Maiji District, Tianshui                     | 2011                          | 1                        | 2011                         | 1                       |
| China    | Mayang                                       | 2011                          | 1                        | 2011                         | 1                       |
| China    | Meixian                                      | 2011                          | 1                        | 2011                         | 1                       |
| China    | Minhe                                        | 2011                          | 1                        | 2011                         | 1                       |
| China    | Naidong                                      | 2011                          | 1                        | 2011                         | 1                       |
| China    | Nangang District, Harbin City                | 1992-2012                     | 21                       | 1992-2012                    | 14                      |
| China    | Nantong                                      | 2011                          | 1                        | 2011                         | 1                       |
| China    | Neixiang                                     | 2011                          | 1                        | 2011                         | 1                       |
| China    | Ningyang                                     | 2011                          | 1                        | 2011                         | 1                       |
| China    | Nongqishi                                    | 2011                          | 1                        | 2011                         | 1                       |
| China    | Pengzhou                                     | 2011                          | 1                        | 2011                         | 1                       |
| China    | Pingluo                                      | 2011                          | 1                        | 2011                         | 1                       |
| China    | Qianxi County                                | 2009-2011                     | 3                        | 2009-2011                    | 2                       |
| China    | Qidong County                                | 1990-2011                     | 22                       | 1990-2011                    | 21                      |
| China    | Qidong County                                | 1983-2012                     | 30                       | 1983-2012                    | 0                       |

| Location | Registry                      | Years available from registry | Years used for incidence | Years available for MI ratio | Years used for MI ratio |
|----------|-------------------------------|-------------------------------|--------------------------|------------------------------|-------------------------|
| China    | Qingdao                       | 2011                          | 1                        | 2011                         | 1                       |
| China    | Qinghe                        | 2011                          | 1                        | 2011                         | 1                       |
| China    | Qingpu                        | 2011                          | 1                        | 2011                         | 1                       |
| China    | Qingyang District, Chengdu    | 2009-2011                     | 3                        | 2009-2011                    | 2                       |
| China    | Qinhuangdao                   | 2011                          | 1                        | 2011                         | 1                       |
| China    | Qionghai                      | 2011                          | 1                        | 2011                         | 1                       |
| China    | Renhe District, Panzihua      | 2011                          | 1                        | 2011                         | 1                       |
| China    | Rushan                        | 2011                          | 1                        | 2011                         | 1                       |
| China    | Sanmenxia                     | 2011                          | 1                        | 2011                         | 1                       |
| China    | Sanya                         | 2011                          | 1                        | 2011                         | 1                       |
| China    | Shanggao                      | 2011                          | 1                        | 2011                         | 1                       |
| China    | Shanghai                      | 1975-2012                     | 38                       | 1975-2012                    | 21                      |
| China    | Shangyu                       | 2009-2011                     | 3                        | 2009-2011                    | 2                       |
| China    | Shangzhi                      | 2009-2011                     | 3                        | 2009-2011                    | 2                       |
| China    | Shangzhou District, Shangluo  | 2011                          | 1                        | 2011                         | 1                       |
| China    | Shapingba District, Chongqing | 2011                          | 1                        | 2011                         | 1                       |
| China    | Shenqiu                       | 2011                          | 1                        | 2011                         | 1                       |
| China    | Shenyang City                 | 2003-2012                     | 10                       | 2003-2012                    | 8                       |
| China    | Shenzen City                  | 2004-2011                     | 8                        | 2004-2011                    | 1                       |
| China    | Shexian County                | 2003-2012                     | 10                       | 2003-2012                    | 8                       |
| China    | Sheyang County                | 2008-2012                     | 5                        | 2008-2012                    | 3                       |
| China    | Shifeng District, Zhuzhou     | 2011                          | 1                        | 2011                         | 1                       |
| China    | Shihezi                       | 2011                          | 1                        | 2011                         | 1                       |
| China    | Shouxian                      | 2011                          | 1                        | 2011                         | 1                       |
| China    | Shouyang                      | 2011                          | 1                        | 2011                         | 1                       |
| China    | Sihui                         | 1998-2011                     | 14                       | 1998-2011                    | 13                      |
| China    | Suzhou                        | 2006-2011                     | 6                        | 2006-2011                    | 5                       |
| China    | Taixing                       | 2004-2011                     | 8                        | 2004-2011                    | 6                       |
| China    | Tengchong                     | 2011                          | 1                        | 2011                         | 1                       |
| China    | Tengzhou                      | 2011                          | 1                        | 2011                         | 1                       |
| China    | Tianchang                     | 2011                          | 1                        | 2011                         | 1                       |
| China    | Tianjin                       | 1981-2011                     | 31                       | 1981-2011                    | 16                      |
| China    | Tianjin Rural Areas           | 2011                          | 1                        | 2011                         | 1                       |
| China    | Tianshan District, Urumqi     | 2011                          | 1                        | 2011                         | 1                       |
| China    | Tong'an District, Xiamen      | 2011                          | 1                        | 2011                         | 1                       |
| China    | Tongguan                      | 2011                          | 1                        | 2011                         | 1                       |
| China    | Tonghua                       | 2011                          | 1                        | 2011                         | 1                       |

| Location | Registry                      | Years available from registry | Years used for incidence | Years available for MI ratio | Years used for MI ratio |
|----------|-------------------------------|-------------------------------|--------------------------|------------------------------|-------------------------|
| China    | Tongling                      | 2008-2012                     | 5                        | 2008-2012                    | 3                       |
| China    | Wanzhouqu District, Chongqing | 2011                          | 1                        | 2011                         | 1                       |
| China    | Wenshang County               | 2009-2011                     | 3                        | 2009-2011                    | 2                       |
| China    | Wuan                          | 2011                          | 1                        | 2011                         | 1                       |
| China    | Wufeng                        | 2011                          | 1                        | 2011                         | 1                       |
| China    | Wuhan City                    | 1990-2012                     | 23                       | 1990-2012                    | 18                      |
| China    | Wuhu                          | 2011                          | 1                        | 2011                         | 1                       |
| China    | Wuning                        | 2011                          | 1                        | 2011                         | 1                       |
| China    | Wuwei                         | 2004                          | 1                        | 2004                         | 0                       |
| China    | Wuxi                          | 2006-2012                     | 7                        | 2006-2012                    | 2                       |
| China    | Xiamen City                   | 2009-2011                     | 3                        | 2009-2011                    | 2                       |
| China    | Xiang'an District, Xiamen     | 2011                          | 1                        | 2011                         | 1                       |
| China    | Xiangfang District, Harbin    | 2011                          | 1                        | 2011                         | 1                       |
| China    | Xianju County                 | 2009-2012                     | 4                        | 2009-2012                    | 2                       |
| China    | Xilinhaote                    | 2011                          | 1                        | 2011                         | 1                       |
| China    | Xinghualing District, Taiyuan | 2011                          | 1                        | 2011                         | 1                       |
| China    | Xining                        | 2009-2011                     | 3                        | 2009-2011                    | 2                       |
| China    | Xinyuan                       | 2011                          | 1                        | 2011                         | 1                       |
| China    | Xinzhou District, Shangrao    | 2011                          | 1                        | 2011                         | 1                       |
| China    | Xiping County                 | 2009-2012                     | 4                        | 2009-2012                    | 2                       |
| China    | Xuanwei                       | 2011                          | 1                        | 2011                         | 1                       |
| China    | Xuyi County                   | 2009-2011                     | 3                        | 2009-2011                    | 2                       |
| China    | Xuzhou                        | 2011                          | 1                        | 2011                         | 1                       |
| China    | Yakeshi                       | 2011                          | 1                        | 2011                         | 1                       |
| China    | Yancheng                      | 2011                          | 1                        | 2011                         | 1                       |
| China    | Yancheng District, Luohe      | 2011                          | 1                        | 2011                         | 1                       |
| China    | Yangcheng County              | 2003-2011                     | 9                        | 2003-2011                    | 8                       |
| China    | Yangquan                      | 2009-2011                     | 3                        | 2009-2011                    | 2                       |
| China    | Yangshan                      | 2011                          | 1                        | 2011                         | 1                       |
| China    | Yangzhong                     | 1998-2011                     | 14                       | 1998-2011                    | 13                      |
| China    | Yanji                         | 2009-2011                     | 3                        | 2009-2011                    | 2                       |
| China    | Yanshi                        | 2009-2012                     | 4                        | 2009-2012                    | 2                       |
| China    | Yantai                        | 2011                          | 1                        | 2011                         | 1                       |
| China    | Yanting County                | 1998-2012                     | 15                       | 1998-2012                    | 13                      |
| China    | Yinchuan                      | 2011                          | 1                        | 2011                         | 1                       |
| China    | Yingdong District, Fuyang     | 2011                          | 1                        | 2011                         | 1                       |
| China    | Yingshan                      | 2011                          | 1                        | 2011                         | 1                       |
| China    | Yiyuan                        | 2011                          | 1                        | 2011                         | 1                       |

| Location       | Registry                    | Years available from registry | Years used for incidence | Years available for MI ratio | Years used for MI ratio |
|----------------|-----------------------------|-------------------------------|--------------------------|------------------------------|-------------------------|
| China          | Yongding                    | 2011                          | 1                        | 2011                         | 1                       |
| China          | Yongqiao District, Suzhou   | 2011                          | 1                        | 2011                         | 1                       |
| China          | Yuanhui District, Luohe     | 2011                          | 1                        | 2011                         | 1                       |
| China          | Yuanqu                      | 2011                          | 1                        | 2011                         | 1                       |
| China          | Yucheng                     | 2011                          | 1                        | 2011                         | 1                       |
| China          | Yuci District, Jinzhong     | 2011                          | 1                        | 2011                         | 1                       |
| China          | Yueyanglou                  | 2009-2012                     | 4                        | 2009-2012                    | 1                       |
| China          | Yunmeng County              | 2009-2011                     | 3                        | 2009-2011                    | 2                       |
| China          | Yuzhong District, Chongqing | 2011                          | 1                        | 2011                         | 1                       |
| China          | Yuzhou                      | 2011                          | 1                        | 2011                         | 1                       |
| China          | Zanhuang                    | 2011                          | 1                        | 2011                         | 1                       |
| China          | Zhanggong District          | 2009                          | 1                        | 2009                         | 1                       |
| China          | Zhanggong District, Ganzhou | 2011                          | 1                        | 2011                         | 1                       |
| China          | Zhangqiu                    | 2011                          | 1                        | 2011                         | 1                       |
| China          | Zhaoling District, Luohe    | 2011                          | 1                        | 2011                         | 1                       |
| China          | Zhaoyuan                    | 2011                          | 1                        | 2011                         | 1                       |
| China          | Zhongshan                   | 1998-2012                     | 15                       | 1998-2012                    | 13                      |
| China          | Zhongshan County            | 2004-2007                     | 4                        | 2004-2007                    | 0                       |
| China          | Zhongwei                    | 2011                          | 1                        | 2011                         | 1                       |
| China          | Zhongxiang                  | 2011                          | 1                        | 2011                         | 1                       |
| China          | Zhuanghe                    | 2009-2011                     | 3                        | 2009-2011                    | 2                       |
| China          | Zhuhai                      | 2010-2012                     | 3                        | 2010-2012                    | 1                       |
| China          | Ziliujing District          | 2009                          | 1                        | 2009                         | 1                       |
| China          | Ziliujing District, Zigong  | 2011                          | 1                        | 2011                         | 1                       |
| China          | Zixing                      | 2011                          | 1                        | 2011                         | 1                       |
| China          | Zoucheng                    | 2011                          | 1                        | 2011                         | 1                       |
| Colombia       | Bucaramanga                 | 2003-2012                     | 10                       | 2003-2012                    | 0                       |
| Colombia       | Cali                        | 1962-2012                     | 51                       | 1962-2012                    | 0                       |
| Colombia       | Manizales                   | 2003-2012                     | 10                       | 2003-2012                    | 0                       |
| Colombia       | National Registry           | 2003-2010                     | 8                        | 2003-2010                    | 0                       |
| Colombia       | Pasto                       | 2003-2012                     | 10                       | 2003-2012                    | 0                       |
| Costa Rica     | National Registry           | 1980-2011                     | 32                       | 1980-2013                    | 0                       |
| Croatia        | National Registry           | 1988-2012                     | 25                       | 1988-2012                    | 8                       |
| Cuba           | National Registry           | 1968-1987                     | 19                       | 1968-1986                    | 0                       |
| Cuba           | Villa Clara                 | 1995-2007                     | 13                       | 1995-2007                    | 0                       |
| Cyprus         | National Registry           | 1998-2012                     | 15                       | 1998-2012                    | 4                       |
| Czech Republic | National Registry           | 1983-2012                     | 30                       | 1983-2012                    | 5                       |
| Denmark        | National Registry           | 1953-2014                     | 62                       | 1953-2014                    | 41                      |



| Location         | Registry                    | Years available from registry | Years used for incidence | Years available for MI ratio | Years used for MI ratio |
|------------------|-----------------------------|-------------------------------|--------------------------|------------------------------|-------------------------|
| Ecuador          | Cuenca                      | 2003-2007                     | 5                        | 2003-2007                    | 0                       |
| Ecuador          | Quito                       | 1985-2012                     | 28                       | 1985-2012                    | 0                       |
| Egypt            | Aswan                       | 2008                          | 1                        | 2008                         | 0                       |
| Egypt            | Damietta                    | 2009                          | 1                        | 2009                         | 0                       |
| Egypt            | Gharbiah                    | 1999-2007                     | 9                        | 1999-2007                    | 0                       |
| Egypt            | Minia                       | 2009                          | 1                        | 2009                         | 0                       |
| Estonia          | National Registry           | 1968-2012                     | 45                       | 1968-2012                    | 5                       |
| Faroe Islands    | Faroe Islands               | 1960-2005                     | 46                       | 1960-2006                    | 0                       |
| Fiji             | National Registry           | 1998-2010                     | 13                       | 1998-2010                    | 11                      |
| Finland          | National Registry           | 1953-2014                     | 62                       | 1953-2014                    | 41                      |
| France           | Bas Rhin                    | 1975-2011                     | 37                       | 1975-2011                    | 0                       |
| France           | Calvados                    | 1978-2012                     | 35                       | 1978-2012                    | 0                       |
| France           | Calvados Digestive          | 1978-2009                     | 32                       | 1978-2009                    | 0                       |
| France           | Cote d'Or                   | 1980-2009                     | 30                       | 1980-2009                    | 0                       |
| France           | Doubs                       | 1977-2012                     | 36                       | 1977-2012                    | 0                       |
| France           | Finistere Digestive         | 1984-2009                     | 26                       | 1984-2009                    | 0                       |
| France           | Haut Rhin                   | 1988-2012                     | 25                       | 1988-2012                    | 0                       |
| France           | Herault                     | 1987-2012                     | 26                       | 1987-2012                    | 0                       |
| France           | Isere                       | 1979-2012                     | 34                       | 1979-2012                    | 0                       |
| France           | Loire Atlantique            | 1991-2012                     | 22                       | 1991-2012                    | 0                       |
| France           | Manche                      | 1994-2011                     | 18                       | 1994-2011                    | 0                       |
| France           | Nord                        | 2005-2009                     | 5                        | 2005-2009                    | 0                       |
| France           | Normandy                    | 2002-2009                     | 8                        | 2002-2009                    | 0                       |
| France           | Somme                       | 1982-2012                     | 31                       | 1982-2012                    | 0                       |
| France           | Tarn                        | 1982-2012                     | 31                       | 1982-2012                    | 0                       |
| France           | Vendee                      | 1998-2012                     | 15                       | 1998-2012                    | 0                       |
| French Polynesia | French Polynesia            | 1988-2002                     | 5                        | 1998-2002                    | 0                       |
| Germany          | Bavaria                     | 2002-2012                     | 11                       | 2002-2012                    | 0                       |
| Germany          | Berlin                      | 1998-2007                     | 10                       | 1998-2007                    | 0                       |
| Germany          | Brandenburg                 | 1998-2007                     | 10                       | 1998-2007                    | 0                       |
| Germany          | Bremen                      | 2000-2012                     | 13                       | 2000-2012                    | 0                       |
| Germany          | Eastern States (former GDR) | 1964-1989                     | 26                       | 1964-1989                    | 0                       |
| Germany          | Free State of Saxony        | 1998-2007                     | 10                       | 1998-2007                    | 0                       |
| Germany          | Hamburg                     | 1969-2012                     | 44                       | 1969-2012                    | 2                       |
| Germany          | Lower Saxony                | 2003-2012                     | 10                       | 2003-2012                    | 0                       |
| Germany          | Mecklenburg                 | 1998-2007                     | 10                       | 1998-2007                    | 0                       |

| Location  | Registry                      | Years available from registry | Years used for incidence | Years available for MI ratio | Years used for MI ratio |
|-----------|-------------------------------|-------------------------------|--------------------------|------------------------------|-------------------------|
| Germany   | Mecklenburg-West Pomerania    | 1998-2007                     | 10                       | 1998-2007                    | 0                       |
| Germany   | Munich                        | 1998-2012                     | 15                       | 1998-2012                    | 0                       |
| Germany   | National Registry             | 2000-2010                     | 11                       | 2000-2010                    | 11                      |
| Germany   | North Rhine Westphalia        | 1998-2007                     | 10                       | 1994-2007                    | 2                       |
| Germany   | Rhineland Palatinate          | 2000-2012                     | 13                       | 2000-2012                    | 0                       |
| Germany   | Saarland                      | 1968-2012                     | 45                       | 1968-2012                    | 30                      |
| Germany   | Saxony-Anhalt                 | 1998-2007                     | 10                       | 1998-2007                    | 0                       |
| Germany   | Schleswig Holstein            | 1998-2012                     | 15                       | 1998-2012                    | 2                       |
| Germany   | Thuringen                     | 1998-2007                     | 10                       | 1998-2007                    | 0                       |
| Germany   | Westphalia                    | 1998-2012                     | 15                       | 1998-2012                    | 0                       |
| Greece    | National Registry             | 1990-1991                     | 2                        | 1990-1991                    | 0                       |
| Greenland | Greenland                     | 1980-2014                     | 35                       | 1980-2014                    | 0                       |
| Grenada   | St. George's Central Hospital | 1996-2000                     | 5                        | 1996-2000                    | 0                       |
| Guinea    | Conakry                       | 1992-1995                     | 4                        | 1992-1995                    | 0                       |
| Hungary   | County Szabolcs-Szatmar       | 1962-1987                     | 26                       | 1962-1987                    | 0                       |
| Hungary   | County Vas                    | 1962-1987                     | 26                       | 1962-1987                    | 0                       |
| Hungary   | Miskolc                       | 1962-1966                     | 5                        | 1962-1966                    | 0                       |
| Hungary   | National Registry             | 2001-2011                     | 11                       | 2001-2011                    | 0                       |
| Iceland   | National Registry             | 1955-2014                     | 60                       | 1955-2014                    | 41                      |
| Iran      | Ardabil                       | 1985-2008                     | 24                       | 1985-2008                    | 0                       |
| Iran      | Golestan                      | 1996-2011                     | 16                       | 1996-2011                    | 0                       |
| Iran      | National Registry             | 2003-2007                     | 5                        | 2003-2007                    | 0                       |
| Iraq      | National Registry             | 2007-2011                     | 5                        | 2007-2011                    | 0                       |
| Ireland   | National Registry             | 1994-2012                     | 19                       | 1994-2012                    | 0                       |
| Ireland   | Southern Ireland              | 1980-1992                     | 13                       | 1980-1992                    | 0                       |
| Israel    | National Registry             | 1960-2012                     | 53                       | 1960-2012                    | 0                       |
| Italy     | Alto Adige                    | 2003-2006                     | 4                        | 2003-2006                    | 0                       |
| Italy     | Biella                        | 1995-2012                     | 18                       | 1995-2012                    | 0                       |
| Italy     | Brescia                       | 1999-2007                     | 8                        | 1999-2006                    | 0                       |
| Italy     | Catania and Messina           | 2003-2005                     | 3                        | 2003-2005                    | 0                       |
| Italy     | Catanzaro                     | 2003-2007                     | 5                        | 2003-2007                    | 0                       |
| Italy     | Como                          | 2003-2011                     | 9                        | 2003-2011                    | 0                       |
| Italy     | Ferrara                       | 1991-2011                     | 21                       | 1991-2011                    | 0                       |
| Italy     | Florence                      | 1985-2002                     | 18                       | 1985-2002                    | 0                       |
| Italy     | Florence and Prato            | 1985-2010                     | 26                       | 1985-2010                    | 0                       |
| Italy     | Friuli Venezia Giulia         | 2003-2010                     | 8                        | 2003-2010                    | 0                       |
| Italy     | Genoa                         | 1986-2007                     | 21                       | 1986-2006                    | 0                       |
| Italy     | Latina                        | 1983-2012                     | 30                       | 1983-2012                    | 0                       |

| Location | Registry          | Years available from registry | Years used for incidence | Years available for MI ratio | Years used for MI ratio |
|----------|-------------------|-------------------------------|--------------------------|------------------------------|-------------------------|
| Italy    | Lecco             | 2003-2010                     | 8                        | 2003-2010                    | 0                       |
| Italy    | Macerata          | 1991-2000                     | 10                       | 1991-2000                    | 0                       |
| Italy    | Mantua            | 2003-2010                     | 8                        | 2003-2010                    | 0                       |
| Italy    | Milan             | 1999-2012                     | 14                       | 1999-2012                    | 0                       |
| Italy    | Modena            | 1988-2012                     | 25                       | 1988-2012                    | 0                       |
| Italy    | Naples            | 1998-2012                     | 15                       | 1998-2012                    | 0                       |
| Italy    | National Registry | 2006-2009                     | 4                        | 2006-2009                    | 4                       |
| Italy    | North East Italy  | 1995-2002                     | 8                        | 1995-2002                    | 0                       |
| Italy    | Nuoro             | 2003-2012                     | 10                       | 2003-2012                    | 0                       |
| Italy    | Palermo           | 2003-2012                     | 10                       | 2003-2012                    | 0                       |
| Italy    | Parma             | 1978-2012                     | 35                       | 1978-2012                    | 0                       |
| Italy    | Ragusa            | 1978-2007                     | 27                       | 1981-2007                    | 0                       |
| Italy    | Reggio Emilia     | 1998-2012                     | 15                       | 1998-2012                    | 0                       |
| Italy    | Romanga           | 1985-2012                     | 27                       | 1986-2012                    | 0                       |
| Italy    | Salerno           | 1998-2007                     | 10                       | 1998-2007                    | 0                       |
| Italy    | Sassari           | 1993-2011                     | 19                       | 1993-2011                    | 0                       |
| Italy    | Sondrio           | 1998-2012                     | 15                       | 1998-2012                    | 0                       |
| Italy    | South Lombard     | 2003-2005                     | 3                        | 2003-2005                    | 0                       |
| Italy    | South Tyrol       | 2003-2010                     | 3                        | 2008-2010                    | 0                       |
| Italy    | Syracuse          | 1999-2012                     | 14                       | 1999-2012                    | 0                       |
| Italy    | Torino            | 1984-2007                     | 23                       | 1985-2007                    | 0                       |
| Italy    | Trapani           | 2003-2006                     | 4                        | 2003-2006                    | 0                       |
| Italy    | Trento            | 2003-2010                     | 8                        | 2003-2010                    | 0                       |
| Italy    | Trieste           | 1983-1992                     | 9                        | 1984-1992                    | 0                       |
| Italy    | Umbria            | 1994-2011                     | 18                       | 1994-2011                    | 1                       |
| Italy    | Varese            | 1976-2012                     | 37                       | 1976-2012                    | 0                       |
| Italy    | Veneto            | 1988-2010                     | 23                       | 1988-2010                    | 0                       |
| Jamaica  | National Registry | 1958-2011                     | 54                       | 1958-2011                    | 0                       |
| Japan    | Aichi             | 1998-2012                     | 15                       | 1998-2012                    | 1                       |
| Japan    | Fukui             | 1998-2012                     | 15                       | 1998-2012                    | 0                       |
| Japan    | Fukuoka           | 1974-1975                     | 2                        | 1974-1975                    | 0                       |
| Japan    | Hiroshima         | 1978-2012                     | 35                       | 1978-2012                    | 0                       |
| Japan    | Miyagi            | 1959-2010                     | 52                       | 1959-2010                    | 0                       |
| Japan    | Nagasaki          | 1973-2012                     | 40                       | 1973-2012                    | 0                       |
| Japan    | National Registry | 1975-2010                     | 36                       | 1958-2013                    | 36                      |
| Japan    | Niigata           | 2003-2012                     | 10                       | 2003-2012                    | 0                       |
| Japan    | Okayama           | 1966-1969                     | 4                        | 1966-1969                    | 0                       |
| Japan    | Osaka             | 1963-2012                     | 50                       | 1963-2012                    | 0                       |
| Japan    | Saga              | 1984-2007                     | 24                       | 1984-2007                    | 0                       |

| Location      | Registry           | Years available from registry | Years used for incidence | Years available for MI ratio | Years used for MI ratio |
|---------------|--------------------|-------------------------------|--------------------------|------------------------------|-------------------------|
| Japan         | Yamagata           | 1983-2012                     | 30                       | 1983-2012                    | 0                       |
| Jordan        | National Registry  | 2001-2008                     | 8                        | 2001-2008                    | 0                       |
| Kenya         | Nairobi            | 2000-2012                     | 13                       | 2000-2012                    | 0                       |
| Kuwait        | National Registry  | 1979-2012                     | 34                       | 1979-2012                    | 0                       |
| Kyrgyzstan    | National Registry  | 1986-1987                     | 2                        | 1986-1987                    | 0                       |
| La Martinique | La Martinique      | 1981-2012                     | 32                       | 1981-2012                    | 0                       |
| La Reunion    | La Reunion         | 1988-1994                     | 7                        | 1988-1994                    | 0                       |
| Latvia        | National Registry  | 1983-2012                     | 30                       | 1983-2012                    | 5                       |
| Lebanon       | National Registry  | 1998-2007                     | 10                       | 1998-2007                    | 0                       |
| Libya         | Benghazi           | 2003-2005                     | 3                        | 2003-2005                    | 0                       |
| Lithuania     | National Registry  | 1978-2012                     | 35                       | 1978-2012                    | 3                       |
| Malawi        | Blantyre           | 1994-2007                     | 14                       | 1994-2007                    | 0                       |
| Malaysia      | National Registry  | 2003                          | 1                        | 2003                         | 0                       |
| Malaysia      | Penang             | 1998-2010                     | 13                       | 1998-2010                    | 0                       |
| Malaysia      | Sarawak            | 1998-2002                     | 5                        | 1998-2002                    | 0                       |
| Mali          | Bamako             | 1987-1996                     | 10                       | 1987-1996                    | 0                       |
| Malta         | National Registry  | 1969-2012                     | 44                       | 1969-2012                    | 15                      |
| Mongolia      | National Registry  | 2003-2007                     | 5                        | 2003-2007                    | 0                       |
| Morocco       | Greater Casablanca | 2004                          | 1                        | 2004                         | 0                       |
| Mozambique    | Lourenco Marques   | 1956-1960                     | 5                        | 1956-1960                    | 0                       |
| Namibia       | National Registry  | 2000-2014                     | 15                       | 2000-2014                    | 0                       |
| Netherlands   | Eindhoven          | 1973-2007                     | 35                       | 1973-2007                    | 0                       |
| Netherlands   | Maastricht         | 1986-2002                     | 17                       | 1986-2002                    | 0                       |
| Netherlands   | National Registry  | 1989-2012                     | 24                       | 1989-2012                    | 0                       |
| Netherlands   | Three Provinces    | 1960-1962                     | 3                        | 1960-1962                    | 0                       |
| New Zealand   | National Registry  | 1968-2015                     | 33                       | 1983-2015                    | 6                       |
| Nigeria       | Calabar            | 2009-2013                     | 5                        | 2009-2013                    | 0                       |
| Nigeria       | Ibadan             | 1960-1969                     | 10                       | 1960-1969                    | 0                       |
| Nigeria       | Midwestern Nigeria | NA                            |                          | 2008-2009                    | 0                       |
| Norway        | National Registry  | 1953-2014                     | 62                       | 1953-2014                    | 40                      |
| Oman          | National Registry  | 1993-2013                     | 21                       | 1993-2013                    | 0                       |

| Location    | Registry                 | Years available from registry | Years used for incidence | Years available for MI ratio | Years used for MI ratio |
|-------------|--------------------------|-------------------------------|--------------------------|------------------------------|-------------------------|
| Pakistan    | South Karachi            | 1995-2002                     | 8                        | 1995-2002                    | 0                       |
| Palestine   | West Bank                | 2010-2011                     | 2                        | 2010-2011                    | 0                       |
| Panama      | National Registry        | 1988-2011                     | 24                       | 1988-2011                    | 12                      |
| Paraguay    | Asuncion Region          | 1988-1989                     | 2                        | 1988-1989                    | 0                       |
| Peru        | Lima                     | 1990-2012                     | 23                       | 1990-2012                    | 0                       |
| Peru        | Trujillo                 | 1984-2002                     | 19                       | 1984-2002                    | 1                       |
| Philippines | Manila                   | 1983-2012                     | 30                       | 1983-2012                    | 0                       |
| Philippines | Rizal                    | 1978-2012                     | 35                       | 1978-2012                    | 0                       |
| Poland      | Cieszyn                  | 1968-1977                     | 5                        | 1973-1977                    | 0                       |
| Poland      | Cieszyn and Nowy Sacz    | 1968-1972                     | 5                        | 1968-1972                    | 0                       |
| Poland      | Cracow                   | 1968-2006                     | 34                       | 1973-2006                    | 0                       |
| Poland      | Cracow City and District | 1965-1972                     | 8                        | 1965-1972                    | 0                       |
| Poland      | Four Rural Areas         | 1965-1966                     | 2                        | 1965-1966                    | 0                       |
| Poland      | Katowice                 | 1965-1977                     | 10                       | 1965-1974                    | 0                       |
| Poland      | Kielce                   | 1988-2012                     | 25                       | 1988-2012                    | 0                       |
| Poland      | Lower Silesia            | 1984-2012                     | 29                       | 1984-2012                    | 0                       |
| Poland      | National Registry        | 1999-2011                     | 13                       | 1999-2011                    | 13                      |
| Poland      | Nowy Sacz                | 1973-1986                     | 14                       | 1973-1986                    | 0                       |
| Poland      | Opole                    | 1985-1987                     | 3                        | 1985-1987                    | 0                       |
| Poland      | Rzeszow                  | 2003-2007                     | 5                        | 2003-2007                    | 0                       |
| Poland      | Warsaw                   | 1988-2002                     | 15                       | 1988-2002                    | 0                       |
| Poland      | Warsaw Rural             | 1968-1987                     | 20                       | 1968-1987                    | 0                       |
| Poland      | Warsaw Urban             | 1965-2002                     | 38                       | 1965-2002                    | 0                       |
| Portugal    | Azores                   | 1997-2011                     | 15                       | 1981-2012                    | 15                      |
| Portugal    | Centre                   | 2003-2007                     | 5                        | 2003-2007                    | 5                       |
| Portugal    | North Portugal           | 2000-2006                     | 7                        | 2000-2006                    | 7                       |
| Portugal    | Porto                    | 1998-2002                     | 5                        | 1998-2002                    | 0                       |
| Portugal    | South Portugal           | 1998-2007                     | 10                       | 1998-2007                    | 0                       |
| Portugal    | Vila Nova de Gaia        | 1983-1997                     | 15                       | 1983-1997                    | 0                       |
| Qatar       | National Registry        | 2003-2007                     | 5                        | 2003-2007                    | 0                       |
| Romania     | Banat Region             | 1967                          | 1                        | 1967                         | 0                       |
| Romania     | Cluj                     | 2007                          | 1                        | 2007                         | 1                       |
| Romania     | County Cluj              | 1974-1987                     | 14                       | 1974-1987                    | 0                       |
| Romania     | County Timis             | 1970-1972                     | 3                        | 1970-1972                    | 0                       |
| Romania     | Timisoara                | 2008                          | 1                        | 2008                         | 0                       |

| Location           | Registry            | Years available from registry | Years used for incidence | Years available for MI ratio | Years used for MI ratio |
|--------------------|---------------------|-------------------------------|--------------------------|------------------------------|-------------------------|
| Russian Federation | St Petersburg       | 1983-2007                     | 25                       | 1983-2007                    | 0                       |
| Samoa              | National Registry   | 1980-1988                     | 9                        | 1980-1988                    | 0                       |
| Saudi Arabia       | National Registry   | 1994-2012                     | 19                       | 1994-2012                    | 8                       |
| Senegal            | Dakar               | 1969-1974                     | 6                        | 1969-1974                    | 0                       |
| Serbia             | Central Serbia      | 2003-2007                     | 5                        | 2003-2007                    | 5                       |
| Serbia             | National Registry   | 1999-2002                     | 4                        | 1999-2002                    | 0                       |
| Serbia             | Vojvodina           | 1988-1997                     | 10                       | 1988-1997                    | 0                       |
| Seychelles         | National Registry   | 2009-2012                     | 4                        | 2009-2012                    | 0                       |
| Singapore          | National Registry   | 1950-2015                     | 66                       | 1950-2015                    | 0                       |
| Slovakia           | National Registry   | 1968-2010                     | 43                       | 1968-2010                    | 30                      |
| Slovenia           | National Registry   | 1956-2014                     | 59                       | 1956-2014                    | 12                      |
| South Africa       | Johannesburg, Bantu | 1953-1955                     | 3                        | 1953-1955                    | 0                       |
| South Africa       | National Registry   | 2003-2011                     | 9                        | 2003-2011                    | 0                       |
| South Africa       | PROMECC             | 1998-2007                     | 10                       | 1998-2007                    | 0                       |
| South Korea        | Busan               | 1996-2012                     | 17                       | 1996-2012                    | 0                       |
| South Korea        | Daegu               | 1997-2012                     | 16                       | 1997-2012                    | 0                       |
| South Korea        | Daejeon             | 1998-2012                     | 15                       | 1998-2012                    | 0                       |
| South Korea        | Gwangju             | 1998-2012                     | 15                       | 1998-2012                    | 0                       |
| South Korea        | Incheon             | 1998-2012                     | 15                       | 1998-2012                    | 0                       |
| South Korea        | Jeju                | 2000-2012                     | 13                       | 2000-2012                    | 0                       |
| South Korea        | Kangwha County      | 1986-1997                     | 12                       | 1986-1997                    | 0                       |
| South Korea        | National Registry   | 1999-2014                     | 16                       | 1999-2014                    | 0                       |
| South Korea        | Seoul               | 1993-2012                     | 20                       | 1993-2012                    | 0                       |
| South Korea        | Ulsan               | 1999-2012                     | 14                       | 1999-2012                    | 0                       |
| Spain              | Albacete            | 1991-2010                     | 20                       | 1991-2010                    | 6                       |
| Spain              | Asturias            | 1988-2010                     | 23                       | 1988-2010                    | 5                       |

| Location    | Registry                | Years available from registry | Years used for incidence | Years available for MI ratio | Years used for MI ratio |
|-------------|-------------------------|-------------------------------|--------------------------|------------------------------|-------------------------|
| Spain       | Balears                 | 1988-2005                     | 18                       | 1988-2005                    | 0                       |
| Spain       | Basque Country          | 1986-2012                     | 27                       | 1986-2012                    | 4                       |
| Spain       | Canary Islands          | 1993-2011                     | 19                       | 1993-2011                    | 0                       |
| Spain       | Ciudad Real             | 2004-2011                     | 8                        | 2004-2011                    | 0                       |
| Spain       | Cuenca                  | 1993-2012                     | 20                       | 1993-2012                    | 5                       |
| Spain       | Girona                  | 1980-2012                     | 33                       | 1980-2012                    | 23                      |
| Spain       | Granada                 | 1985-2012                     | 28                       | 1985-2012                    | 23                      |
| Spain       | La Rioja                | 1993-2012                     | 20                       | 1993-2012                    | 13                      |
| Spain       | Mallorca                | 1988-2011                     | 24                       | 1988-2011                    | 0                       |
| Spain       | Murcia                  | 1983-2010                     | 28                       | 1983-2010                    | 25                      |
| Spain       | Navarra                 | 1973-2010                     | 38                       | 1973-2010                    | 31                      |
| Spain       | Tarragona               | 1980-2012                     | 33                       | 1980-2012                    | 24                      |
| Spain       | Zaragoza                | 1968-2000                     | 33                       | 1968-2000                    | 0                       |
| Sri Lanka   | National Registry       | 2001-2005                     | 5                        | 2001-2005                    | 0                       |
| Sweden      | National Registry       | 1958-2014                     | 57                       | 1958-2014                    | 40                      |
| Sweden      | Stockholm               | 1990-2016                     | 27                       | 1990-2016                    | 0                       |
| Sweden      | Sweden except Stockholm | 1990-2016                     | 27                       | 1990-2016                    | 0                       |
| Switzerland | Basel                   | 1981-2007                     | 27                       | 1981-2007                    | 0                       |
| Switzerland | Geneva                  | 1970-2012                     | 43                       | 1970-2012                    | 29                      |
| Switzerland | Graubunden              | 1989-1997                     | 9                        | 1989-1997                    | 0                       |
| Switzerland | Graubunden and Glarus   | 1989-2012                     | 24                       | 1980-2012                    | 20                      |
| Switzerland | National Registry       | 1989-2013                     | 25                       | 1989-2013                    | 0                       |
| Switzerland | Neuchatel               | 1974-2012                     | 39                       | 1974-2012                    | 5                       |
| Switzerland | St Gallen - Appenzell   | 1980-2012                     | 33                       | 1980-2012                    | 29                      |
| Switzerland | Ticino                  | 1996-2012                     | 17                       | 1996-2012                    | 0                       |
| Switzerland | Valais                  | 1989-2012                     | 24                       | 1989-2012                    | 0                       |
| Switzerland | Vaud                    | 1975-2012                     | 38                       | 1975-2012                    | 5                       |
| Switzerland | Zurich                  | 1980-2012                     | 33                       | 1980-2012                    | 0                       |
| Taiwan      | National Registry       | 1980-2007                     | 28                       | 1980-2007                    | 28                      |
| Thailand    | Bangkok                 | 1995-2010                     | 16                       | 1995-2010                    | 0                       |
| Thailand    | Chiang Mai              | 1983-2012                     | 30                       | 1983-2012                    | 0                       |
| Thailand    | Chonburi                | 2001-2011                     | 11                       | 2001-2011                    | 0                       |
| Thailand    | Khon Kaen               | 1988-2012                     | 25                       | 1988-2012                    | 0                       |
| Thailand    | Lampang                 | 1993-2012                     | 20                       | 1993-2012                    | 0                       |
| Thailand    | Lop Buri                | 2001-2003                     | 3                        | 2001-2003                    | 0                       |
| Thailand    | Nakhon Phanom           | 2001-2003                     | 3                        | 2001-2003                    | 0                       |
| Thailand    | Prachuap Khiri          | 2001-2003                     | 3                        | 2001-2003                    | 0                       |
| Thailand    | Rayong                  | 2001-2003                     | 3                        | 2001-2003                    | 0                       |
| Thailand    | Songkhla                | 1993-2012                     | 20                       | 1993-2012                    | 0                       |

| Location            | Registry                | Years available from registry | Years used for incidence | Years available for MI ratio | Years used for MI ratio |
|---------------------|-------------------------|-------------------------------|--------------------------|------------------------------|-------------------------|
| Thailand            | Surat Thani             | 2001-2003                     | 3                        | 2001-2003                    | 0                       |
| Thailand            | Ubon Ratchathani        | 2001-2003                     | 3                        | 2001-2003                    | 0                       |
| Thailand            | Udon Thani              | 2001-2003                     | 3                        | 2001-2003                    | 0                       |
| The Gambia          | National Registry       | 1987-1998                     | 12                       | 1987-1998                    | 0                       |
| Trinidad and Tobago | National Registry       | 1995-2006                     | 12                       | 1995-2006                    | 0                       |
| Tunisia             | Centre Sousse           | 1998-2002                     | 5                        | 1998-2002                    | 0                       |
| Tunisia             | North Tunisia           | 2003-2005                     | 3                        | 2003-2005                    | 0                       |
| Turkey              | Ankara                  | 2002-2005                     | 4                        | 2002-2005                    | 0                       |
| Turkey              | Antalya                 | 1998-2012                     | 15                       | 1998-2012                    | 0                       |
| Turkey              | Edirne                  | 2002-2012                     | 11                       | 2002-2012                    | 0                       |
| Turkey              | Eight Provinces         | 2006-2007                     | 2                        | 2006-2007                    | 0                       |
| Turkey              | Erzurum                 | 2002-2012                     | 11                       | 2002-2012                    | 0                       |
| Turkey              | Eskisehir               | 2002-2012                     | 11                       | 2002-2012                    | 0                       |
| Turkey              | Izmir                   | 1998-2012                     | 15                       | 1998-2012                    | 0                       |
| Turkey              | Nine Provinces          | 2008-2014                     | 7                        | 2008-2014                    | 0                       |
| Turkey              | Samsun                  | 2002-2012                     | 11                       | 2002-2012                    | 0                       |
| Turkey              | Trabzon                 | 2002-2012                     | 11                       | 2002-2012                    | 0                       |
| Uganda              | Kampala                 | 1954-2013                     | 60                       | 1954-2013                    | 0                       |
| Ukraine             | National Registry       | 2003-2012                     | 10                       | 2003-2012                    | 2                       |
| United Kingdom      | Aryshire                | 1970-1972                     | 3                        | 1970-1972                    | 0                       |
| United Kingdom      | East Anglia             | 1988-1997                     | 10                       | 1988-1997                    | 0                       |
| United Kingdom      | East Midlands           | 1990-2014                     | 25                       | 1981-2014                    | 16                      |
| United Kingdom      | East Scotland           | 1973-1987                     | 15                       | 1973-1987                    | 0                       |
| United Kingdom      | East of England         | 1990-2014                     | 25                       | 1981-2014                    | 16                      |
| United Kingdom      | England                 | 1993-2016                     | 24                       | 1993-2016                    | 0                       |
| United Kingdom      | England and Wales       | 1979-1990                     | 12                       | 1979-1990                    | 0                       |
| United Kingdom      | Greater London          | 1990-2014                     | 25                       | 1981-2014                    | 16                      |
| United Kingdom      | Merseyside and Cheshire | 1959-2002                     | 44                       | 1959-2002                    | 0                       |
| United Kingdom      | National Registry       | 2008-2012                     | 5                        | 2008-2012                    | 0                       |



| Location       | Registry                       | Years available from registry | Years used for incidence | Years available for MI ratio | Years used for MI ratio |
|----------------|--------------------------------|-------------------------------|--------------------------|------------------------------|-------------------------|
| United Kingdom | North East England             | 1990-2014                     | 25                       | 1981-2014                    | 16                      |
| United Kingdom | North East Scotland            | 1973-1987                     | 15                       | 1973-1987                    | 0                       |
| United Kingdom | North Scotland                 | 1973-1987                     | 15                       | 1973-1987                    | 0                       |
| United Kingdom | North West England             | 1973-2014                     | 42                       | 1973-2014                    | 24                      |
| United Kingdom | Northern England and Yorkshire | 1998-2012                     | 15                       | 1998-2012                    | 0                       |
| United Kingdom | Oxford                         | 1963-2007                     | 45                       | 1963-2007                    | 0                       |
| United Kingdom | Scotland                       | 1963-2015                     | 53                       | 1963-2015                    | 81                      |
| United Kingdom | South East England             | 1990-2014                     | 25                       | 1981-2014                    | 16                      |
| United Kingdom | South East Scotland            | 1973-1987                     | 15                       | 1973-1987                    | 0                       |
| United Kingdom | South Thames                   | 1960-2007                     | 38                       | 1960-1997                    | 0                       |
| United Kingdom | South West England             | 1960-2014                     | 55                       | 1960-2014                    | 15                      |
| United Kingdom | Thames                         | 1998-2007                     | 5                        | 1991-2007                    | 0                       |
| United Kingdom | Trent                          | 1963-2007                     | 45                       | 1963-2007                    | 0                       |
| United Kingdom | Wales                          | 2003-2012                     | 10                       | 1981-2012                    | 2                       |
| United Kingdom | West Midlands                  | 1960-2014                     | 55                       | 1960-2014                    | 27                      |
| United Kingdom | West Scotland                  | 1975-1992                     | 18                       | 1975-1992                    | 0                       |
| United Kingdom | Yorkshire                      | 1983-2002                     | 20                       | 1983-2002                    | 0                       |
| United Kingdom | Yorkshire and the Humber       | 1990-2014                     | 25                       | 1981-2014                    | 17                      |
| United States  | Alabama                        | 1998-2012                     | 15                       | 1998-2012                    | 0                       |
| United States  | Alameda County                 | 1969-1987                     | 5                        | 1983-1987                    | 0                       |
| United States  | Alaska                         | 1992-2013                     | 22                       | 1992-2013                    | 0                       |
| United States  | Arizona                        | 1998-2012                     | 15                       | 1998-2012                    | 0                       |

| Location      | Registry                         | Years available from registry | Years used for incidence | Years available for MI ratio | Years used for MI ratio |
|---------------|----------------------------------|-------------------------------|--------------------------|------------------------------|-------------------------|
| United States | Arkansas                         | 2003-2012                     | 10                       | 2003-2012                    | 0                       |
| United States | Atlanta                          | 1973-2013                     | 41                       | 1973-2013                    | 46                      |
| United States | California                       | 1998-2012                     | 15                       | 1998-2012                    | 0                       |
| United States | California except SF, SJ-M, & LA | 2000-2013                     | 14                       | 2000-2013                    | 9                       |
| United States | Central California               | 1988-1992                     | 5                        | 1988-1992                    | 0                       |
| United States | Colorado                         | 1998-2012                     | 15                       | 1998-2012                    | 0                       |
| United States | Connecticut                      | 1960-2013                     | 54                       | 1960-2013                    | 48                      |
| United States | Delaware                         | 2003-2012                     | 10                       | 2003-2012                    | 0                       |
| United States | Detroit                          | 1969-2013                     | 41                       | 1973-2013                    | 47                      |
| United States | District of Columbia             | 1998-2002                     | 5                        | 1998-2002                    | 0                       |
| United States | El Paso                          | 1960-1970                     | 11                       | 1960-1970                    | 0                       |
| United States | Florida                          | 1998-2012                     | 15                       | 1998-2012                    | 0                       |
| United States | Georgia                          | 1998-2012                     | 15                       | 1998-2012                    | 0                       |
| United States | Greater Georgia                  | 1973-2013                     | 41                       | 1973-2013                    | 13                      |
| United States | Hawaii                           | 1960-2013                     | 54                       | 1960-2013                    | 48                      |
| United States | Idaho                            | 1998-2012                     | 15                       | 1998-2012                    | 0                       |
| United States | Illinois                         | 1998-2012                     | 15                       | 1998-2012                    | 0                       |
| United States | Indiana                          | 1998-2012                     | 15                       | 1998-2012                    | 0                       |
| United States | Iowa                             | 1969-2013                     | 41                       | 1973-2013                    | 48                      |
| United States | Kentucky                         | 1973-2013                     | 41                       | 1973-2013                    | 21                      |
| United States | Los Angeles                      | 1973-2013                     | 41                       | 1973-2013                    | 29                      |
| United States | Louisiana                        | 1973-2013                     | 41                       | 1973-2013                    | 20                      |

| Location      | Registry                      | Years available from registry | Years used for incidence | Years available for MI ratio | Years used for MI ratio |
|---------------|-------------------------------|-------------------------------|--------------------------|------------------------------|-------------------------|
| United States | Maine                         | 1998-2012                     | 15                       | 1998-2012                    | 0                       |
| United States | Maryland                      | 2008-2012                     | 5                        | 2008-2012                    | 0                       |
| United States | Massachusetts                 | 1998-2012                     | 15                       | 1998-2012                    | 0                       |
| United States | Michigan                      | 1998-2012                     | 15                       | 1998-2012                    | 0                       |
| United States | Minnesota                     | 2008-2012                     | 5                        | 2008-2012                    | 0                       |
| United States | Mississippi                   | 2003-2012                     | 10                       | 2003-2012                    | 0                       |
| United States | Missouri                      | 1998-2012                     | 15                       | 1998-2012                    | 0                       |
| United States | Montana                       | 1998-2012                     | 15                       | 1998-2012                    | 0                       |
| United States | National Registry             | 1962-2012                     | 51                       | 1962-2012                    | 0                       |
| United States | Nebraska                      | 2003-2012                     | 10                       | 2003-2012                    | 0                       |
| United States | Nevada                        | 1959-2012                     | 54                       | 1959-2012                    | 0                       |
| United States | New Hampshire                 | 2003-2012                     | 10                       | 2003-2012                    | 0                       |
| United States | New Jersey                    | 1973-2013                     | 41                       | 1973-2013                    | 21                      |
| United States | New Mexico                    | 1969-2013                     | 45                       | 1969-2013                    | 48                      |
| United States | New Orleans                   | 1974-2012                     | 30                       | 1983-2012                    | 0                       |
| United States | New York                      | 1993-2012                     | 20                       | 1993-2012                    | 0                       |
| United States | New York except New York City | 1959-1987                     | 3                        | 1959-1961                    | 0                       |
| United States | North Carolina                | 2003-2012                     | 10                       | 2003-2012                    | 0                       |
| United States | North Dakota                  | 2003-2012                     | 10                       | 2003-2012                    | 0                       |
| United States | Ohio                          | 1998-2012                     | 15                       | 1998-2012                    | 0                       |
| United States | Oklahoma                      | 1998-2012                     | 15                       | 1998-2012                    | 0                       |
| United States | Oregon                        | 1998-2012                     | 15                       | 1998-2012                    | 0                       |

| Location      | Registry                                                | Years available from registry | Years used for incidence | Years available for MI ratio | Years used for MI ratio |
|---------------|---------------------------------------------------------|-------------------------------|--------------------------|------------------------------|-------------------------|
| United States | Pennsylvania                                            | 1998-2012                     | 15                       | 1998-2012                    | 0                       |
| United States | Rhode Island                                            | 1998-2012                     | 15                       | 1998-2012                    | 0                       |
| United States | Rural Georgia                                           | 1973-2013                     | 41                       | 1973-2013                    | 24                      |
| United States | San Francisco                                           | 1969-2012                     | 40                       | 1973-2012                    | 0                       |
| United States | San Francisco, Oakland, San Mateo, and Surrounding Area | 1973-2013                     | 41                       | 1973-2013                    | 36                      |
| United States | San Jose Monterey                                       | 1973-2013                     | 41                       | 1973-2013                    | 28                      |
| United States | Seattle                                                 | 1973-2013                     | 41                       | 1973-2013                    | 47                      |
| United States | South Carolina                                          | 1998-2012                     | 15                       | 1998-2012                    | 0                       |
| United States | South Dakota                                            | 2003-2012                     | 10                       | 2003-2012                    | 0                       |
| United States | Tennessee                                               | 2003-2012                     | 10                       | 2003-2012                    | 0                       |
| United States | Texas                                                   | 1998-2012                     | 15                       | 1998-2012                    | 0                       |
| United States | Utah                                                    | 1966-2013                     | 41                       | 1973-2013                    | 47                      |
| United States | Vermont                                                 | 1998-2012                     | 15                       | 1998-2012                    | 0                       |
| United States | Virginia                                                | 2003-2012                     | 10                       | 2003-2012                    | 0                       |
| United States | Washington                                              | 1998-2012                     | 15                       | 1998-2012                    | 0                       |
| United States | West Virginia                                           | 1998-2012                     | 15                       | 1998-2012                    | 0                       |
| United States | Wisconsin                                               | 1998-2012                     | 15                       | 1998-2012                    | 0                       |
| United States | Wyoming                                                 | 2003-2012                     | 10                       | 2003-2012                    | 0                       |
| Uruguay       | Montevideo                                              | 1990-1995                     | 6                        | 1990-1995                    | 0                       |
| Uruguay       | National Registry                                       | 2002-2012                     | 11                       | 2002-2012                    | 0                       |
| Vietnam       | Hanoi                                                   | 1991-1997                     | 7                        | 1991-1997                    | 0                       |
| Vietnam       | Ho Chi Minh                                             | 1995-2012                     | 18                       | 1995-2012                    | 0                       |
| Zimbabwe      | Bulawayo                                                | 1963-1972                     | 10                       | 1963-1972                    | 0                       |
| Zimbabwe      | Harare                                                  | 1990-2006                     | 17                       | 1990-2006                    | 0                       |

| Location | Registry          | Years available from registry | Years used for incidence | Years available for MI ratio | Years used for MI ratio |
|----------|-------------------|-------------------------------|--------------------------|------------------------------|-------------------------|
| Zimbabwe | National Registry | 2005-2006                     | 2                        | 2005-2006                    | 0                       |

*eTable 3: Number of site-years for cancer mortality data by type*

| <b>Cause</b>               | <b>VR GBD 2016</b> | <b>VR GBD 2017</b> | <b>VR change GBD 2016 to GBD 2017</b> | <b>VA GBD 2016</b> | <b>VA GBD 2017</b> | <b>VA change GBD 2016 to GBD 2017</b> | <b>CR GBD 2016</b> | <b>CR GBD 2017</b> | <b>CR change GBD 2016 to GBD 2017</b> | <b>Total GBD 2016</b> | <b>Total GBD 2017</b> | <b>Total change GBD 2016 to GBD 2017</b> |
|----------------------------|--------------------|--------------------|---------------------------------------|--------------------|--------------------|---------------------------------------|--------------------|--------------------|---------------------------------------|-----------------------|-----------------------|------------------------------------------|
| All malignant neoplasms    | 540770             | 656430             | 21%                                   | 6541               | 6900               | 5%                                    | 82457              | 129641             | 57%                                   | 629768                | 792971                | 26%                                      |
| Lip and oral cavity cancer | 15962              | 19322              | 21%                                   | 585                | 638                | 9%                                    | 2758               | 4315               | 56%                                   | 19305                 | 24275                 | 26%                                      |
| Nasopharynx cancer         | 15988              | 19320              | 21%                                   |                    |                    |                                       | 2806               | 4411               | 57%                                   | 18794                 | 23731                 | 26%                                      |
| Other pharynx cancer       | 15967              | 19320              | 21%                                   | 374                | 374                | 0%                                    | 2782               | 4404               | 58%                                   | 19123                 | 24098                 | 26%                                      |
| Esophageal cancer          | 16298              | 19614              | 20%                                   | 590                | 648                | 10%                                   | 2849               | 4453               | 56%                                   | 19737                 | 24715                 | 25%                                      |
| Stomach cancer             | 16304              | 19618              | 20%                                   | 374                | 374                | 0%                                    | 2873               | 4474               | 56%                                   | 19551                 | 24466                 | 25%                                      |

| Cause                                | VR GBD 2016 | VR GBD 2017 | VR change GBD 2016 to GBD 2017 | VA GBD 2016 | VA GBD 2017 | VA change GBD 2016 to GBD 2017 | CR GBD 2016 | CR GBD 2017 | CR change GBD 2016 to GBD 2017 | Total GBD 2016 | Total GBD 2017 | Total change GBD 2016 to GBD 2017 |
|--------------------------------------|-------------|-------------|--------------------------------|-------------|-------------|--------------------------------|-------------|-------------|--------------------------------|----------------|----------------|-----------------------------------|
| All malignant neoplasms              | 540770      | 656430      | 21%                            | 6541        | 6900        | 5%                             | 82457       | 129641      | 57%                            | 629768         | 792971         | 26%                               |
| Colon and rectum cancer              | 16303       | 19618       | 20%                            | 602         | 660         | 10%                            | 2873        | 4474        | 56%                            | 19778          | 24752          | 25%                               |
| Liver cancer                         | 16028       | 19334       | 21%                            | 374         | 374         | 0%                             | 2859        | 4464        | 56%                            | 19261          | 24172          | 25%                               |
| Gallbladder and biliary tract cancer | 14972       | 18771       | 25%                            |             |             |                                | 2779        | 4400        | 58%                            | 17751          | 23171          | 31%                               |
| Pancreatic cancer                    | 15701       | 19321       | 23%                            |             |             |                                | 2862        | 4472        | 56%                            | 18563          | 23793          | 28%                               |
| Larynx cancer                        | 16280       | 19614       | 20%                            | 374         | 374         | 0%                             | 2846        | 4456        | 57%                            | 19500          | 24444          | 25%                               |

| Cause                               | VR GBD 2016 | VR GBD 2017 | VR change GBD 2016 to GBD 2017 | VA GBD 2016 | VA GBD 2017 | VA change GBD 2016 to GBD 2017 | CR GBD 2016 | CR GBD 2017 | CR change GBD 2016 to GBD 2017 | Total GBD 2016 | Total GBD 2017 | Total change GBD 2016 to GBD 2017 |
|-------------------------------------|-------------|-------------|--------------------------------|-------------|-------------|--------------------------------|-------------|-------------|--------------------------------|----------------|----------------|-----------------------------------|
| All malignant neoplasms             | 540770      | 656430      | 21%                            | 6541        | 6900        | 5%                             | 82457       | 129641      | 57%                            | 629768         | 792971         | 26%                               |
| Tracheal, bronchus, and lung cancer | 16303       | 19618       | 20%                            | 602         | 655         | 9%                             | 2853        | 4459        | 56%                            | 19758          | 24732          | 25%                               |
| Malignant skin melanoma             | 16018       | 19322       | 21%                            |             |             |                                | 2704        | 4351        | 61%                            | 18722          | 23673          | 26%                               |
| Non-melanoma skin cancer            | 15581       | 19329       | 24%                            |             |             |                                |             |             |                                | 15581          | 19329          | 24%                               |



| Cause                                              | VR GBD 2016 | VR GBD 2017 | VR change GBD 2016 to GBD 2017 | VA GBD 2016 | VA GBD 2017 | VA change GBD 2016 to GBD 2017 | CR GBD 2016 | CR GBD 2017 | CR change GBD 2016 to GBD 2017 | Total GBD 2016 | Total GBD 2017 | Total change GBD 2016 to GBD 2017 |
|----------------------------------------------------|-------------|-------------|--------------------------------|-------------|-------------|--------------------------------|-------------|-------------|--------------------------------|----------------|----------------|-----------------------------------|
| All malignant neoplasms                            | 540770      | 656430      | 21%                            | 6541        | 6900        | 5%                             | 82457       | 129641      | 57%                            | 629768         | 792971         | 26%                               |
| Non-melanoma skin cancer (squamous-cell carcinoma) | 14204       | 18772       | 32%                            |             |             |                                |             |             |                                | 14204          | 18772          | 32%                               |
| Breast cancer                                      | 16294       | 19618       | 20%                            | 618         | 678         | 10%                            | 2861        | 4458        | 56%                            | 19773          | 24754          | 25%                               |
| Cervical cancer                                    | 16295       | 19618       | 20%                            | 370         | 370         |                                | 2809        | 4378        | 56%                            | 19474          | 24366          | 25%                               |
| Uterine cancer                                     | 16280       | 19604       | 20%                            | 374         | 374         | 0%                             | 2831        | 4434        | 57%                            | 19485          | 24412          | 25%                               |
| Ovarian cancer                                     | 15710       | 19318       | 23%                            |             |             |                                | 2845        | 4455        | 57%                            | 18555          | 23773          | 28%                               |
| Prostate cancer                                    | 16247       | 19615       | 21%                            |             |             |                                | 2826        | 4455        | 58%                            | 19073          | 24070          | 26%                               |

| Cause                           | VR GBD 2016 | VR GBD 2017 | VR change GBD 2016 to GBD 2017 | VA GBD 2016 | VA GBD 2017 | VA change GBD 2016 to GBD 2017 | CR GBD 2016 | CR GBD 2017 | CR change GBD 2016 to GBD 2017 | Total GBD 2016 | Total GBD 2017 | Total change GBD 2016 to GBD 2017 |
|---------------------------------|-------------|-------------|--------------------------------|-------------|-------------|--------------------------------|-------------|-------------|--------------------------------|----------------|----------------|-----------------------------------|
| All malignant neoplasms         | 540770      | 656430      | 21%                            | 6541        | 6900        | 5%                             | 82457       | 129641      | 57%                            | 629768         | 792971         | 26%                               |
| Testicular cancer               | 14549       | 18774       | 29%                            | 130         | 160         | 23%                            | 2734        | 4425        | 62%                            | 17413          | 23359          | 34%                               |
| Kidney cancer                   | 16010       | 19318       | 21%                            |             |             |                                | 2716        | 4342        | 60%                            | 18726          | 23660          | 26%                               |
| Bladder cancer                  | 16010       | 19320       | 21%                            |             |             |                                | 2656        | 4279        | 61%                            | 18666          | 23599          | 26%                               |
| Brain and nervous system cancer | 15705       | 19321       | 23%                            | 378         | 427         | 13%                            | 2885        | 4478        | 55%                            | 18968          | 24226          | 28%                               |
| Thyroid cancer                  | 15634       | 19319       | 24%                            |             |             |                                | 2826        | 4457        | 58%                            | 18460          | 23776          | 29%                               |
| Mesothelioma                    | 7418        | 10944       | 48%                            |             |             |                                |             |             |                                | 7418           | 10944          | 48%                               |
| Hodgkin lymphoma                | 15991       | 19319       | 21%                            |             |             |                                | 2762        | 4439        | 61%                            | 18753          | 23758          | 27%                               |

| Cause                   | VR GBD 2016 | VR GBD 2017 | VR change GBD 2016 to GBD 2017 | VA GBD 2016 | VA GBD 2017 | VA change GBD 2016 to GBD 2017 | CR GBD 2016 | CR GBD 2017 | CR change GBD 2016 to GBD 2017 | Total GBD 2016 | Total GBD 2017 | Total change GBD 2016 to GBD 2017 |
|-------------------------|-------------|-------------|--------------------------------|-------------|-------------|--------------------------------|-------------|-------------|--------------------------------|----------------|----------------|-----------------------------------|
| All malignant neoplasms | 540770      | 656430      | 21%                            | 6541        | 6900        | 5%                             | 82457       | 129641      | 57%                            | 629768         | 792971         | 26%                               |
| Non-Hodgkin lymphoma    | 16011       | 19321       | 21%                            |             |             |                                | 2860        | 4468        | 56%                            | 18871          | 23789          | 26%                               |
| Multiple myeloma        | 16005       | 19318       | 21%                            |             |             |                                | 2737        | 4426        | 62%                            | 18742          | 23744          | 27%                               |
| Leukemia                | 16851       | 19617       | 16%                            | 585         | 584         | 0%                             | 2925        | 4462        | 53%                            | 20361          | 24663          | 21%                               |
| Acute lymphoid leukemia | 13930       | 16763       | 20%                            |             |             |                                | 1130        | 1672        | 48%                            | 15060          | 18435          | 22%                               |

| Cause                     | VR GBD 2016 | VR GBD 2017 | VR change GBD 2016 to GBD 2017 | VA GBD 2016 | VA GBD 2017 | VA change GBD 2016 to GBD 2017 | CR GBD 2016 | CR GBD 2017 | CR change GBD 2016 to GBD 2017 | Total GBD 2016 | Total GBD 2017 | Total change GBD 2016 to GBD 2017 |
|---------------------------|-------------|-------------|--------------------------------|-------------|-------------|--------------------------------|-------------|-------------|--------------------------------|----------------|----------------|-----------------------------------|
| All malignant neoplasms   | 540770      | 656430      | 21%                            | 6541        | 6900        | 5%                             | 82457       | 129641      | 57%                            | 629768         | 792971         | 26%                               |
| Chronic lymphoid leukemia | 13926       | 16763       | 20%                            |             |             |                                | 1104        | 1651        | 50%                            | 15030          | 18414          | 23%                               |
| Acute myeloid leukemia    | 13930       | 16763       | 20%                            |             |             |                                | 1118        | 2490        | 123%                           | 15048          | 19253          | 28%                               |
| Chronic myeloid leukemia  | 13930       | 16763       | 20%                            |             |             |                                | 1124        | 1664        | 48%                            | 15054          | 18427          | 22%                               |
| Other leukemia            | 15986       | 16765       |                                | 211         | 210         | 0%                             | 1913        | 3935        |                                | 18110          | 20910          |                                   |

| Cause                     | VR GBD 2016 | VR GBD 2017 | VR change GBD 2016 to GBD 2017 | VA GBD 2016 | VA GBD 2017 | VA change GBD 2016 to GBD 2017 | CR GBD 2016 | CR GBD 2017 | CR change GBD 2016 to GBD 2017 | Total GBD 2016 | Total GBD 2017 | Total change GBD 2016 to GBD 2017 |
|---------------------------|-------------|-------------|--------------------------------|-------------|-------------|--------------------------------|-------------|-------------|--------------------------------|----------------|----------------|-----------------------------------|
| All malignant neoplasms   | 540770      | 656430      | 21%                            | 6541        | 6900        | 5%                             | 82457       | 129641      | 57%                            | 629768         | 792971         | 26%                               |
| Other malignant neoplasms | 16149       | 19376       | 54%                            |             |             |                                | 2951        | 3140        | 21%                            | 19100          | 22516          | 18%                               |

*eTable 4: List of International Classification of Diseases (ICD) codes mapped to the Global Burden of Disease cause list for cancer incidence data*

| <b>Cause</b>                                       | <b>ICD10</b>                                                                                                                   | <b>ICD9</b>                                                                           |
|----------------------------------------------------|--------------------------------------------------------------------------------------------------------------------------------|---------------------------------------------------------------------------------------|
| Lip and oral cavity cancer                         | C00-C07, C08-C08.9, Z85.81-Z85.810                                                                                             | 140-145.9, V76.42                                                                     |
| Nasopharynx cancer                                 | C11-C11.9                                                                                                                      | 147-147.9                                                                             |
| Other pharynx cancer                               | C09-C10.9, C12-C13.9                                                                                                           | 146-146.9, 148-148.9                                                                  |
| Esophageal cancer                                  | C15-C15.9, Z85.01                                                                                                              | 150-150.9                                                                             |
| Stomach cancer                                     | C16-C16.9, Z12.0, Z85.02-Z85.028                                                                                               | 151-151.9, 209.23, V10.04                                                             |
| Colon and rectum cancer                            | C18-C19.0, C20, C21-C21.8, Z12.1-Z12.13, Z85.03-Z85.048, Z86.010                                                               | 153-154.9, 209.1-209.17, V10.05-V10.06, V76.41, V76.5-V76.52                          |
| Liver cancer                                       | C22-C22.4, C22.7-C22.9, Z85.05                                                                                                 | 155-155.9, V10.07                                                                     |
| Gallbladder and biliary tract cancer               | C23, C24-C24.9                                                                                                                 | 156-156.9                                                                             |
| Pancreatic cancer                                  | C25-C25.9, Z85.07                                                                                                              | 157-157.9                                                                             |
| Larynx cancer                                      | C32-C32.9, Z85.21                                                                                                              | 161-161.9, V10.21                                                                     |
| Tracheal, bronchus, and lung cancer                | C33, C34-C34.92, Z12.2, Z80.1-Z80.2, Z85.1-Z85.20                                                                              | 162-162.9, 209.21, V10.1-V10.20, V16.1-V16.2, V16.4-V16.40                            |
| Malignant skin melanoma                            | C43-C43.9, Z85.82-Z85.828                                                                                                      | 172-172.9                                                                             |
| Non-melanoma skin cancer                           | C44-C44.99                                                                                                                     | 173-173.99, 216-216.9, 232-232.9                                                      |
| Non-melanoma skin cancer (squamous-cell carcinoma) | C44.02, C44.12-C44.129, C44.22-C44.229, C44.32-C44.329, C44.42, C44.52-C44.529, C44.62-C44.629, C44.72-C44.729, C44.82, C44.92 | 173.02, 173.12, 173.22, 173.32, 173.42, 173.52, 173.62, 173.72, 173.82, 173.92        |
| Non-melanoma skin cancer (basal-cell carcinoma)    | C44.01, C44.11-C44.119, C44.21-C44.219, C44.31-C44.319, C44.41, C44.51-C44.519, C44.61-C44.619, C44.71-C44.719, C44.81, C44.91 | 173.01, 173.11, 173.21, 173.31, 173.41, 173.51, 173.60-173.61, 173.71, 173.81, 173.91 |
| Breast cancer                                      | C50-C50.629, C50.8-C50.929, Z12.3-Z12.39, Z80.3, Z85.3, Z86.000                                                                | 174-175.9, V10.3, V16.3                                                               |
| Cervical cancer                                    | C53-C53.9, Z12.4, Z85.41                                                                                                       | 180-180.9, V10.41, V72.32                                                             |
| Uterine cancer                                     | C54-C54.3, C54.8-C54.9, Z85.42, Z86.001                                                                                        | 182-182.9                                                                             |
| Ovarian cancer                                     | C56-C56.2, C56.9, Z80.41, Z85.43                                                                                               | 183-183.0, 183.8-183.9, V10.43, V16.41                                                |
| Prostate cancer                                    | C61-C61.9, Z12.5, Z80.42, Z85.46                                                                                               | 185-185.9, V10.46, V16.42, V76.44                                                     |

| Cause                           | ICD10                                                                                             | ICD9                                                                                                                                                                                                  |
|---------------------------------|---------------------------------------------------------------------------------------------------|-------------------------------------------------------------------------------------------------------------------------------------------------------------------------------------------------------|
| Testicular cancer               | C62-C62.92, Z80.43, Z85.47-Z85.48                                                                 | 186-186.9, V10.47-V10.48, V16.43                                                                                                                                                                      |
| Kidney cancer                   | C64-C64.2, C64.9-C65.9, Z80.51, Z85.52-Z85.54                                                     | 189-189.1, 189.5-189.6, 209.24                                                                                                                                                                        |
| Bladder cancer                  | C67-C67.9, Z12.6-Z12.79, Z80.52, Z85.51                                                           | 188-188.9, V10.51, V16.52, V76.3                                                                                                                                                                      |
| Brain and nervous system cancer | C70-C70.1, C70.9-C72.9, Z85.841-Z85.848, Z86.011                                                  | 191-191.9                                                                                                                                                                                             |
| Thyroid cancer                  | C73, Z85.850                                                                                      | 193-193.9                                                                                                                                                                                             |
| Mesothelioma                    | C45-C45.2, C45.7, C45.9                                                                           |                                                                                                                                                                                                       |
| Hodgkin lymphoma                | C81-C81.49, C81.7-C81.79, C81.9-C81.99, Z85.71-Z85.72                                             | 201-201.98, V10.72                                                                                                                                                                                    |
| Non-Hodgkin lymphoma            | C82-C85.29, C85.7-C86.6, C96-C96.9                                                                | 200-200.9, 202-202.98                                                                                                                                                                                 |
| Multiple myeloma                | C88-C90.32                                                                                        | 203-203.9                                                                                                                                                                                             |
| Leukemia                        | C91-C93.7, C93.9-C95.2, C95.7-C95.92, Z80.6, Z85.6                                                | 204-208.92, V10.59-V10.69, V16.6                                                                                                                                                                      |
| Acute lymphoid leukemia         | C91.0-C91.02                                                                                      | 204.0-204.02                                                                                                                                                                                          |
| Chronic lymphoid leukemia       | C91.1-C91.12                                                                                      | 204.1-204.12                                                                                                                                                                                          |
| Acute myeloid leukemia          | C92.0-C92.02, C92.3-C92.62, C93.0-C93.02, C94.0-C94.02, C94.2-C94.22, C94.4-C94.5                 | 205.0-205.02, 205.3-205.32, 206.0-206.02, 207.0                                                                                                                                                       |
| Chronic myeloid leukemia        | C92.1-C92.12                                                                                      | 205.1-205.12, 206.1-206.12, 207.1                                                                                                                                                                     |
| Other leukemia                  | C91.2-C91.9, C92.2, C92.7-C92.9, C93.1-C93.9, C94.1, C94.3, C94.6-C95.9                           | 204.2-204.9, 205.2, 205.8-205.9, 206.2-207, 207.2-208.9                                                                                                                                               |
| Other malignant neoplasms       | C17, C30-C31, C37, C38, C40-C41, C47-C49, C4A, C51-C52, C57-C58, C60, C63, C66, C68, C69, C74-C75 | 152-152.9, 158-158.9, 160-160.9, 163-164.9, 170-171.9, 181-181.9, 183.2-183.5, 184-184.9, 187-187.9, 189.2-189.4, 189.8-190.9, 192-192.9, 194-194.8, 209-209.03, 209.22, 209.25-209.27, 209.31-209.36 |

*eTable 5: List of International Classification of Diseases (ICD) codes mapped to the Global Burden of Disease cause list for cancer mortality data*

|                                                    |                                                |                                                          |
|----------------------------------------------------|------------------------------------------------|----------------------------------------------------------|
| Lip and oral cavity cancer                         | C00-C08.9, D10.0-D10.5, D11-D11.9              | 140-145.9, 210.0-210.6, 235.0                            |
| Nasopharynx cancer                                 | C11-C11.9, D10.6                               | 147-147.9, 210.7-210.9                                   |
| Other pharynx cancer                               | C09-C10.9, C12-C13.9, D10.7                    | 146-146.9, 148-148.9                                     |
| Esophageal cancer                                  | C15-C15.9, D00.1, D13.0                        | 150-150.9, 211.0, 230.1                                  |
| Stomach cancer                                     | C16-C16.9, D00.2, D13.1, D37.1                 | 151-151.9, 211.1, 230.2                                  |
| Colon and rectum cancer                            | C18-C21.9, D01.0-D01.3, D12-D12.9, D37.3-D37.5 | 153-154.9, 209.1, 209.5, 211.3-211.4, 230.3-230.6, 569.0 |
| Liver cancer                                       | C22-C22.9, D13.4                               | 155-155.9, 211.5                                         |
| Liver cancer due to hepatitis B                    |                                                |                                                          |
| Liver cancer due to hepatitis C                    |                                                |                                                          |
| Liver cancer due to alcohol use                    |                                                |                                                          |
| Liver cancer due to NASH                           |                                                |                                                          |
| Liver cancer due to other causes                   |                                                |                                                          |
| Gallbladder and biliary tract cancer               | C23-C24.9, D13.5                               | 156-156.9                                                |
| Pancreatic cancer                                  | C25-C25.9, D13.6-D13.7                         | 157-157.9, 211.6-211.7                                   |
| Larynx cancer                                      | C32-C32.9, D02.0, D14.1, D38.0                 | 161-161.9, 212.1, 231.0, 235.6                           |
| Tracheal, bronchus, and lung cancer                | C33-C34.9, D02.1-D02.3, D14.2-D14.3, D38.1     | 162-162.9, 212.2-212.3, 231.1-231.2, 235.7               |
| Malignant skin melanoma                            | C43-C43.9, D03-D03.9, D22-D23.9, D48.5         | 172-172.9                                                |
| Non-melanoma skin cancer                           | C44-C44.9, D04-D04.9, D49.2                    | 173-173.9, 222.4, 232-232.9, 238.2                       |
| Non-melanoma skin cancer (squamous-cell carcinoma) | C44-C44.9, D04-D04.9, D49.2                    | 173-173.9, 222.4, 232-232.9, 238.2                       |
| Breast cancer                                      | C50-C50.9, D05-D05.9, D24-D24.9, D48.6, D49.3  | 174-175.9, 217-217.8, 233.0, 238.3, 239.3, 610-610.9     |
| Cervical cancer                                    | C53-C53.9, D06-D06.9, D26.0                    | 180-180.9, 219.0, 233.1, 622.1-622.2, 622.7              |
| Uterine cancer                                     | C54-C54.9, D07.0-D07.2, D26.1-D26.9            | 182-182.9, 233.2                                         |
| Ovarian cancer                                     | C56-C56.9, D27-D27.9, D39.1                    | 183-183.0, 220-220.9, 236.2                              |



|                                 |                                                                                                                                                                                                                                                                                                                                                                             |                                                                                                                                                                                                                                                                                                                                                                                  |
|---------------------------------|-----------------------------------------------------------------------------------------------------------------------------------------------------------------------------------------------------------------------------------------------------------------------------------------------------------------------------------------------------------------------------|----------------------------------------------------------------------------------------------------------------------------------------------------------------------------------------------------------------------------------------------------------------------------------------------------------------------------------------------------------------------------------|
| Prostate cancer                 | C61-C61.9, D07.5, D29.1, D40.0                                                                                                                                                                                                                                                                                                                                              | 185-185.9, 222.2, 236.5                                                                                                                                                                                                                                                                                                                                                          |
| Testicular cancer               | C62-C62.9, D29.2-D29.8, D40.1-D40.8                                                                                                                                                                                                                                                                                                                                         | 186-186.9, 222.0, 222.3, 236.4                                                                                                                                                                                                                                                                                                                                                   |
| Kidney cancer                   | C64-C65.9, D30.0-D30.1, D41.0-D41.1                                                                                                                                                                                                                                                                                                                                         | 189.0-189.1, 189.5-189.6, 223.0-223.1                                                                                                                                                                                                                                                                                                                                            |
| Bladder cancer                  | C67-C67.9, D09.0, D30.3, D41.4-D41.8, D49.4                                                                                                                                                                                                                                                                                                                                 | 188-188.9, 223.3, 233.7, 236.7, 239.4                                                                                                                                                                                                                                                                                                                                            |
| Brain and nervous system cancer | C70-C72.9                                                                                                                                                                                                                                                                                                                                                                   | 191-192.9                                                                                                                                                                                                                                                                                                                                                                        |
| Thyroid cancer                  | C73-C73.9, D09.3, D09.8, D34-D34.9, D44.0                                                                                                                                                                                                                                                                                                                                   | 193-193.9, 226-226.9                                                                                                                                                                                                                                                                                                                                                             |
| Mesothelioma                    | C45-C45.9                                                                                                                                                                                                                                                                                                                                                                   |                                                                                                                                                                                                                                                                                                                                                                                  |
| Hodgkin lymphoma                | C81-C81.9                                                                                                                                                                                                                                                                                                                                                                   | 201-201.9                                                                                                                                                                                                                                                                                                                                                                        |
| Non-Hodgkin lymphoma            | C82-C86.6, C96-C96.9                                                                                                                                                                                                                                                                                                                                                        | 200-200.9, 202-202.9                                                                                                                                                                                                                                                                                                                                                             |
| Multiple myeloma                | C88-C90.9                                                                                                                                                                                                                                                                                                                                                                   | 203-203.9                                                                                                                                                                                                                                                                                                                                                                        |
| Leukemia                        | C91-C95.9                                                                                                                                                                                                                                                                                                                                                                   | 204-208.9                                                                                                                                                                                                                                                                                                                                                                        |
| Acute lymphoid leukemia         | C91.0                                                                                                                                                                                                                                                                                                                                                                       | 204.0                                                                                                                                                                                                                                                                                                                                                                            |
| Chronic lymphoid leukemia       | C91.1                                                                                                                                                                                                                                                                                                                                                                       | 204.1                                                                                                                                                                                                                                                                                                                                                                            |
| Acute myeloid leukemia          | C92.0, C92.3-C92.6, C93.0, C94.0, C94.2, C94.4-C94.5                                                                                                                                                                                                                                                                                                                        | 205.0, 205.3, 206.0, 207.0                                                                                                                                                                                                                                                                                                                                                       |
| Chronic myeloid leukemia        | C92.1                                                                                                                                                                                                                                                                                                                                                                       | 205.1, 206.1, 207.1                                                                                                                                                                                                                                                                                                                                                              |
| Other leukemia                  | C91, C91.2-C92, C92.2, C92.7-C93, C93.1-C94, C94.1, C94.3, C94.6-C95.9                                                                                                                                                                                                                                                                                                      | 204.2-204.9, 205.2, 205.8-205.9, 206.2-207, 207.2-208.9                                                                                                                                                                                                                                                                                                                          |
| Other malignant cancers         | C17-C17.9, C30-C31.9, C37-C38.8, C40-C41.9, C47-C4A, C51-C52.9, C57-C57.8, C58-C58.0, C60-C60.9, C63-C63.8, C66-C66.9, C68.0-C68.8, C69-C69.9, C74-C75.8, D07.4, D09.2, D13.2-D13.3, D14.0, D15-D16.9, D28.0-D28.1, D28.7, D29.0, D30.2, D30.4-D30.8, D31-D31.9, D35-D35.2, D35.5-D36, D36.1-D36.7, D37.2, D38.2-D38.5, D39.2, D39.8, D41.2-D41.3, D44.1-D44.8, D48.0-D48.4 | 152-152.9, 158-158.9, 160-160.9, 163-164.9, 170-171.9, 181-181.9, 183.2-183.8, 184.0-184.4, 184.8, 187.1-187.8, 189.2-189.4, 189.8, 190-190.9, 194-194.8, 209.0, 209.4, 211.2, 211.8, 212.0, 212.4-212.8, 213-213.9, 221.0-221.8, 222.1, 222.8, 223.2, 223.8, 224-224.9, 227-228.9, 229.0, 229.8, 230.7-230.8, 233.4-233.5, 234.0-234.8, 235.4, 235.8, 236.1, 238.0-238.1, 239.2 |

*eTable 6: Undefined cancer code categories (ICD-10) and respective target codes for cancer registry incidence data*

| <b>Unspecified site cancer codes</b>                                                  | <b>Target codes for redistribution of these unspecified site cancer</b>                                                     |
|---------------------------------------------------------------------------------------|-----------------------------------------------------------------------------------------------------------------------------|
| C14,C14.0-C14.3,C14.8                                                                 | C00-C13.99                                                                                                                  |
| C26,C26.0,C26.1,C26.8,C26.9                                                           | C15.00-C25.99                                                                                                               |
| C39,C39.0,C39.8,C39.9                                                                 | C30.00-C38.99, C45.00-C45.99                                                                                                |
| C55,C55.1,C55.9                                                                       | C53.00-C54.99                                                                                                               |
| C57.9                                                                                 | C51.00-C54.99, C56.00-C58.99                                                                                                |
| C68.9                                                                                 | C64.00-C68.89                                                                                                               |
| C63.9                                                                                 | C60.00-C63.89                                                                                                               |
| C75.9                                                                                 | C73.00-C75.89                                                                                                               |
| C76,C76.4,C76.5,C76.8,C77,C77.3-C77.5,C77.8,C77.9,C78,C79,C79.2-C79.9,C80,C80.0,C80.2 | C00-C99 (Except any unspecified site cancer codes)                                                                          |
| C76.0,C76.1,C77.0,C77.1,C78.0-C78.3                                                   | C00-C13.99,C15, C30-C34.99,C37-C38.99, C40-C42.99, C43-C50.99, C69-C73.9                                                    |
| C76.2,C76.3,C77.2,C7.5,C78.4-C78.8,C79.0,C79.1                                        | C15.00-C25.99, C45.00-C45.99, C48.00-C54.99, C56.00-C58.99, C61, C63.00-C63.89, C64.00-C68.99, C74.00-C75.89, C81.00-C88.99 |

*eTable 7: Socio-demographic Index groupings by geography, based on 2017 values*

| <b>Country Name</b> | <b>SDI Quintile</b> |
|---------------------|---------------------|
| Afghanistan         | Low SDI             |
| Albania             | Middle SDI          |
| Algeria             | Middle SDI          |
| American Samoa      | High-middle SDI     |
| Andorra             | High SDI            |
| Angola              | Low-middle SDI      |
| Antigua and Barbuda | High-middle SDI     |
| Argentina           | High-middle SDI     |
| Armenia             | High-middle SDI     |
| Australia           | High SDI            |
| Austria             | High SDI            |
| Azerbaijan          | High-middle SDI     |
| Bahrain             | High-middle SDI     |
| Bangladesh          | Low SDI             |
| Barbados            | High-middle SDI     |
| Belarus             | High-middle SDI     |
| Belgium             | High SDI            |
| Belize              | Low-middle SDI      |
| Benin               | Low SDI             |

| <b>Country Name</b>              | <b>SDI Quintile</b> |
|----------------------------------|---------------------|
| Bermuda                          | High-middle SDI     |
| Bhutan                           | Low-middle SDI      |
| Bolivia                          | Low-middle SDI      |
| Bosnia and Herzegovina           | High-middle SDI     |
| Botswana                         | Middle SDI          |
| Brazil                           | Middle SDI          |
| Brunei                           | High SDI            |
| Bulgaria                         | High-middle SDI     |
| Burkina Faso                     | Low SDI             |
| Burundi                          | Low SDI             |
| Cambodia                         | Low-middle SDI      |
| Cameroon                         | Low-middle SDI      |
| Canada                           | High SDI            |
| Cape Verde                       | Low-middle SDI      |
| Central African Republic         | Low SDI             |
| Chad                             | Low SDI             |
| Chile                            | High-middle SDI     |
| China                            | High-middle SDI     |
| Colombia                         | Middle SDI          |
| Comoros                          | Low SDI             |
| Congo                            | Low-middle SDI      |
| Costa Rica                       | Middle SDI          |
| Cote d'Ivoire                    | Low SDI             |
| Croatia                          | High SDI            |
| Cuba                             | Middle SDI          |
| Cyprus                           | High SDI            |
| Czech Republic                   | High SDI            |
| Democratic Republic of the Congo | Low SDI             |
| Denmark                          | High SDI            |
| Djibouti                         | Low-middle SDI      |
| Dominica                         | Middle SDI          |
| Dominican Republic               | Low-middle SDI      |
| Ecuador                          | Middle SDI          |
| Egypt                            | Low-middle SDI      |
| El Salvador                      | Low-middle SDI      |
| Equatorial Guinea                | Middle SDI          |
| Eritrea                          | Low SDI             |
| Estonia                          | High SDI            |
| Ethiopia                         | Low SDI             |
| Federated States of Micronesia   | Low-middle SDI      |
| Fiji                             | Middle SDI          |
| Finland                          | High SDI            |
| France                           | High SDI            |
| Gabon                            | Middle SDI          |
| Georgia                          | High-middle SDI     |

| <b>Country Name</b> | <b>SDI Quintile</b> |
|---------------------|---------------------|
| Germany             | High SDI            |
| Ghana               | Low-middle SDI      |
| Greece              | High SDI            |
| Greenland           | High-middle SDI     |
| Grenada             | Middle SDI          |
| Guam                | High-middle SDI     |
| Guatemala           | Low-middle SDI      |
| Guinea              | Low SDI             |
| Guinea-Bissau       | Low SDI             |
| Guyana              | Low-middle SDI      |
| Haiti               | Low SDI             |
| Honduras            | Low-middle SDI      |
| Hungary             | High-middle SDI     |
| Iceland             | High SDI            |
| India               | Low-middle SDI      |
| Indonesia           | Middle SDI          |
| Iran                | High-middle SDI     |
| Iraq                | Low-middle SDI      |
| Ireland             | High SDI            |
| Israel              | High-middle SDI     |
| Italy               | High SDI            |
| Jamaica             | Middle SDI          |
| Japan               | High SDI            |
| Jordan              | Middle SDI          |
| Kazakhstan          | High-middle SDI     |
| Kenya               | Low-middle SDI      |
| Kiribati            | Low SDI             |
| Kuwait              | High-middle SDI     |
| Kyrgyzstan          | Low-middle SDI      |
| Laos                | Low-middle SDI      |
| Latvia              | High SDI            |
| Lebanon             | High-middle SDI     |
| Lesotho             | Low-middle SDI      |
| Liberia             | Low SDI             |
| Libya               | High-middle SDI     |
| Lithuania           | High SDI            |
| Luxembourg          | High SDI            |
| Macedonia           | High-middle SDI     |
| Madagascar          | Low SDI             |
| Malawi              | Low SDI             |
| Malaysia            | High-middle SDI     |
| Maldives            | Middle SDI          |
| Mali                | Low SDI             |
| Malta               | High SDI            |
| Marshall Islands    | Low-middle SDI      |

| <b>Country Name</b>              | <b>SDI Quintile</b> |
|----------------------------------|---------------------|
| Mauritania                       | Low-middle SDI      |
| Mauritius                        | High-middle SDI     |
| Mexico                           | Middle SDI          |
| Moldova                          | Middle SDI          |
| Mongolia                         | Middle SDI          |
| Montenegro                       | High-middle SDI     |
| Morocco                          | Low-middle SDI      |
| Mozambique                       | Low SDI             |
| Myanmar                          | Low-middle SDI      |
| Namibia                          | Middle SDI          |
| Nepal                            | Low SDI             |
| Netherlands                      | High SDI            |
| New Zealand                      | High SDI            |
| Nicaragua                        | Low-middle SDI      |
| Niger                            | Low SDI             |
| Nigeria                          | Low-middle SDI      |
| North Korea                      | Low-middle SDI      |
| Northern Mariana Islands         | High-middle SDI     |
| Norway                           | High SDI            |
| Oman                             | High-middle SDI     |
| Pakistan                         | Low-middle SDI      |
| Palestine                        | Low-middle SDI      |
| Panama                           | Middle SDI          |
| Papua New Guinea                 | Low SDI             |
| Paraguay                         | Middle SDI          |
| Peru                             | Middle SDI          |
| Philippines                      | Middle SDI          |
| Poland                           | High SDI            |
| Portugal                         | High-middle SDI     |
| Puerto Rico                      | High-middle SDI     |
| Qatar                            | High-middle SDI     |
| Romania                          | High-middle SDI     |
| Russian Federation               | High-middle SDI     |
| Rwanda                           | Low SDI             |
| Saint Lucia                      | Middle SDI          |
| Saint Vincent and the Grenadines | Middle SDI          |
| Samoa                            | Low-middle SDI      |
| Sao Tome and Principe            | Low-middle SDI      |
| Saudi Arabia                     | High-middle SDI     |
| Senegal                          | Low SDI             |
| Serbia                           | High-middle SDI     |
| Seychelles                       | Middle SDI          |
| Sierra Leone                     | Low SDI             |
| Singapore                        | High SDI            |
| Slovakia                         | High SDI            |

| <b>Country Name</b>  | <b>SDI Quintile</b> |
|----------------------|---------------------|
| Slovenia             | High SDI            |
| Solomon Islands      | Low SDI             |
| Somalia              | Low SDI             |
| South Africa         | Middle SDI          |
| South Korea          | High SDI            |
| South Sudan          | Low SDI             |
| Spain                | High SDI            |
| Sri Lanka            | Middle SDI          |
| Sudan                | Low-middle SDI      |
| Suriname             | Middle SDI          |
| Swaziland            | Low-middle SDI      |
| Sweden               | High SDI            |
| Switzerland          | High SDI            |
| Syria                | Middle SDI          |
| Taiwan               | High SDI            |
| Tajikistan           | Low-middle SDI      |
| Tanzania             | Low SDI             |
| Thailand             | Middle SDI          |
| The Bahamas          | High-middle SDI     |
| The Gambia           | Low SDI             |
| Timor-Leste          | Low-middle SDI      |
| Togo                 | Low SDI             |
| Tonga                | Middle SDI          |
| Trinidad and Tobago  | Middle SDI          |
| Tunisia              | Middle SDI          |
| Turkey               | High-middle SDI     |
| Turkmenistan         | Middle SDI          |
| Uganda               | Low SDI             |
| Ukraine              | High-middle SDI     |
| United Arab Emirates | High-middle SDI     |
| United Kingdom       | High SDI            |
| United States        | High SDI            |
| Uruguay              | High-middle SDI     |
| Uzbekistan           | Middle SDI          |
| Vanuatu              | Low-middle SDI      |
| Venezuela            | Middle SDI          |
| Vietnam              | Middle SDI          |
| Virgin Islands, US   | High-middle SDI     |
| Yemen                | Low SDI             |
| Zambia               | Low-middle SDI      |
| Zimbabwe             | Low-middle SDI      |

eTable 8: Covariates selected for CODEm for each GBD cancer group and expected direction of covariate

| Cause                   | Sex    | Age start | Age end   | Direction | Level | Covariate                                             |
|-------------------------|--------|-----------|-----------|-----------|-------|-------------------------------------------------------|
| Acute lymphoid leukemia | Male   | 0-6 days  | 95+ years | 0         | 3     | LDI (I\$ per capita)                                  |
| Acute lymphoid leukemia | Female | 0-6 days  | 95+ years | 0         | 3     | LDI (I\$ per capita)                                  |
| Acute lymphoid leukemia | Male   | 0-6 days  | 95+ years | 0         | 3     | Socio-demographic Index                               |
| Acute lymphoid leukemia | Female | 0-6 days  | 95+ years | 0         | 3     | Socio-demographic Index                               |
| Acute lymphoid leukemia | Male   | 0-6 days  | 95+ years | -1        | 2     | Healthcare access and quality index                   |
| Acute lymphoid leukemia | Female | 0-6 days  | 95+ years | -1        | 2     | Healthcare access and quality index                   |
| Acute lymphoid leukemia | Male   | 0-6 days  | 95+ years | -1        | 3     | Education (years per capita)                          |
| Acute lymphoid leukemia | Female | 0-6 days  | 95+ years | -1        | 3     | Education (years per capita)                          |
| Acute lymphoid leukemia | Male   | 0-6 days  | 95+ years | 1         | 2     | Alcohol (liters per capita)                           |
| Acute lymphoid leukemia | Female | 0-6 days  | 95+ years | 1         | 2     | Alcohol (liters per capita)                           |
| Acute lymphoid leukemia | Male   | 0-6 days  | 95+ years | 1         | 2     | Smoking Prevalence                                    |
| Acute lymphoid leukemia | Female | 0-6 days  | 95+ years | 1         | 2     | Smoking Prevalence                                    |
| Acute lymphoid leukemia | Male   | 0-6 days  | 95+ years | 1         | 2     | Tobacco (cigarettes per capita)                       |
| Acute lymphoid leukemia | Female | 0-6 days  | 95+ years | 1         | 2     | Tobacco (cigarettes per capita)                       |
| Acute lymphoid leukemia | Male   | 0-6 days  | 95+ years | 1         | 2     | Cumulative Cigarettes (10 Years)                      |
| Acute lymphoid leukemia | Female | 0-6 days  | 95+ years | 1         | 2     | Cumulative Cigarettes (10 Years)                      |
| Acute lymphoid leukemia | Male   | 0-6 days  | 95+ years | 1         | 2     | Cumulative Cigarettes (15 Years)                      |
| Acute lymphoid leukemia | Female | 0-6 days  | 95+ years | 1         | 2     | Cumulative Cigarettes (15 Years)                      |
| Acute lymphoid leukemia | Male   | 0-6 days  | 95+ years | 1         | 2     | Cumulative Cigarettes (20 Years)                      |
| Acute lymphoid leukemia | Female | 0-6 days  | 95+ years | 1         | 2     | Cumulative Cigarettes (20 Years)                      |
| Acute lymphoid leukemia | Male   | 0-6 days  | 95+ years | 1         | 2     | Cumulative Cigarettes (5 Years)                       |
| Acute lymphoid leukemia | Female | 0-6 days  | 95+ years | 1         | 2     | Cumulative Cigarettes (5 Years)                       |
| Acute lymphoid leukemia | Male   | 0-6 days  | 95+ years | 1         | 1     | Log-transformed SEV scalar: Leukemia                  |
| Acute lymphoid leukemia | Female | 0-6 days  | 95+ years | 1         | 1     | Log-transformed SEV scalar: Leukemia                  |
| Acute lymphoid leukemia | Male   | 0-6 days  | 95+ years | 1         | 1     | Log-transformed age-standardized SEV scalar: Leukemia |
| Acute lymphoid leukemia | Female | 0-6 days  | 95+ years | 1         | 1     | Log-transformed age-standardized SEV scalar: Leukemia |
| Acute myeloid leukemia  | Male   | 0-6 days  | 95+ years | 0         | 3     | LDI (I\$ per capita)                                  |
| Acute myeloid leukemia  | Female | 0-6 days  | 95+ years | 0         | 3     | LDI (I\$ per capita)                                  |
| Acute myeloid leukemia  | Male   | 0-6 days  | 95+ years | 0         | 3     | Socio-demographic Index                               |

|                        |        |             |           |    |   |                                                       |
|------------------------|--------|-------------|-----------|----|---|-------------------------------------------------------|
| Acute myeloid leukemia | Female | 0-6 days    | 95+ years | 0  | 3 | Socio-demographic Index                               |
| Acute myeloid leukemia | Male   | 0-6 days    | 95+ years | -1 | 2 | Healthcare access and quality index                   |
| Acute myeloid leukemia | Female | 0-6 days    | 95+ years | -1 | 2 | Healthcare access and quality index                   |
| Acute myeloid leukemia | Male   | 0-6 days    | 95+ years | -1 | 3 | Education (years per capita)                          |
| Acute myeloid leukemia | Female | 0-6 days    | 95+ years | -1 | 3 | Education (years per capita)                          |
| Acute myeloid leukemia | Male   | 0-6 days    | 95+ years | 1  | 2 | Alcohol (liters per capita)                           |
| Acute myeloid leukemia | Female | 0-6 days    | 95+ years | 1  | 2 | Alcohol (liters per capita)                           |
| Acute myeloid leukemia | Male   | 0-6 days    | 95+ years | 1  | 2 | Smoking Prevalence                                    |
| Acute myeloid leukemia | Female | 0-6 days    | 95+ years | 1  | 2 | Smoking Prevalence                                    |
| Acute myeloid leukemia | Male   | 0-6 days    | 95+ years | 1  | 2 | Tobacco (cigarettes per capita)                       |
| Acute myeloid leukemia | Female | 0-6 days    | 95+ years | 1  | 2 | Tobacco (cigarettes per capita)                       |
| Acute myeloid leukemia | Male   | 0-6 days    | 95+ years | 1  | 2 | Cumulative Cigarettes (10 Years)                      |
| Acute myeloid leukemia | Female | 0-6 days    | 95+ years | 1  | 2 | Cumulative Cigarettes (10 Years)                      |
| Acute myeloid leukemia | Male   | 0-6 days    | 95+ years | 1  | 2 | Cumulative Cigarettes (15 Years)                      |
| Acute myeloid leukemia | Female | 0-6 days    | 95+ years | 1  | 2 | Cumulative Cigarettes (15 Years)                      |
| Acute myeloid leukemia | Male   | 0-6 days    | 95+ years | 1  | 2 | Cumulative Cigarettes (20 Years)                      |
| Acute myeloid leukemia | Female | 0-6 days    | 95+ years | 1  | 2 | Cumulative Cigarettes (20 Years)                      |
| Acute myeloid leukemia | Male   | 0-6 days    | 95+ years | 1  | 2 | Cumulative Cigarettes (5 Years)                       |
| Acute myeloid leukemia | Female | 0-6 days    | 95+ years | 1  | 2 | Cumulative Cigarettes (5 Years)                       |
| Acute myeloid leukemia | Male   | 0-6 days    | 95+ years | 1  | 1 | Log-transformed SEV scalar: Leukemia                  |
| Acute myeloid leukemia | Female | 0-6 days    | 95+ years | 1  | 1 | Log-transformed SEV scalar: Leukemia                  |
| Acute myeloid leukemia | Male   | 0-6 days    | 95+ years | 1  | 1 | Log-transformed age-standardized SEV scalar: Leukemia |
| Acute myeloid leukemia | Female | 0-6 days    | 95+ years | 1  | 1 | Log-transformed age-standardized SEV scalar: Leukemia |
| Bladder cancer         | Male   | 15-19 years | 95+ years | 0  | 3 | LDI (I\$ per capita)                                  |
| Bladder cancer         | Female | 15-19 years | 95+ years | 0  | 3 | LDI (I\$ per capita)                                  |
| Bladder cancer         | Male   | 15-19 years | 95+ years | 0  | 3 | Socio-demographic Index                               |
| Bladder cancer         | Female | 15-19 years | 95+ years | 0  | 3 | Socio-demographic Index                               |
| Bladder cancer         | Male   | 15-19 years | 95+ years | -1 | 2 | Healthcare access and quality index                   |
| Bladder cancer         | Female | 15-19 years | 95+ years | -1 | 2 | Healthcare access and quality index                   |
| Bladder cancer         | Male   | 15-19 years | 95+ years | -1 | 3 | Education (years per capita)                          |
| Bladder cancer         | Female | 15-19 years | 95+ years | -1 | 3 | Education (years per capita)                          |



|                                 |        |             |           |    |   |                                         |
|---------------------------------|--------|-------------|-----------|----|---|-----------------------------------------|
| Bladder cancer                  | Male   | 15-19 years | 95+ years | 1  | 2 | Alcohol (liters per capita)             |
| Bladder cancer                  | Female | 15-19 years | 95+ years | 1  | 2 | Alcohol (liters per capita)             |
| Bladder cancer                  | Male   | 15-19 years | 95+ years | 1  | 1 | Smoking Prevalence                      |
| Bladder cancer                  | Female | 15-19 years | 95+ years | 1  | 1 | Smoking Prevalence                      |
| Bladder cancer                  | Male   | 15-19 years | 95+ years | -1 | 2 | fruits adjusted (g)                     |
| Bladder cancer                  | Female | 15-19 years | 95+ years | -1 | 2 | fruits adjusted (g)                     |
| Bladder cancer                  | Male   | 15-19 years | 95+ years | -1 | 2 | vegetables adjusted (g)                 |
| Bladder cancer                  | Female | 15-19 years | 95+ years | -1 | 2 | vegetables adjusted (g)                 |
| Bladder cancer                  | Male   | 15-19 years | 95+ years | 1  | 1 | Cumulative Cigarettes (10 Years)        |
| Bladder cancer                  | Female | 15-19 years | 95+ years | 1  | 1 | Cumulative Cigarettes (10 Years)        |
| Bladder cancer                  | Male   | 15-19 years | 95+ years | 1  | 1 | Cumulative Cigarettes (15 Years)        |
| Bladder cancer                  | Female | 15-19 years | 95+ years | 1  | 1 | Cumulative Cigarettes (15 Years)        |
| Bladder cancer                  | Male   | 15-19 years | 95+ years | 1  | 1 | Cumulative Cigarettes (5 Years)         |
| Bladder cancer                  | Female | 15-19 years | 95+ years | 1  | 1 | Cumulative Cigarettes (5 Years)         |
| Bladder cancer                  | Male   | 15-19 years | 95+ years | 1  | 1 | Schistosomiasis Prevalence (proportion) |
| Bladder cancer                  | Female | 15-19 years | 95+ years | 1  | 1 | Schistosomiasis Prevalence (proportion) |
| Bladder cancer                  | Male   | 15-19 years | 95+ years | 1  | 1 | Log-transformed SEV scalar: Bladder C   |
| Bladder cancer                  | Female | 15-19 years | 95+ years | 1  | 1 | Log-transformed SEV scalar: Bladder C   |
| Brain and nervous system cancer | Male   | 0-6 days    | 95+ years | 0  | 3 | LDI (I\$ per capita)                    |
| Brain and nervous system cancer | Female | 0-6 days    | 95+ years | 0  | 3 | LDI (I\$ per capita)                    |
| Brain and nervous system cancer | Male   | 0-6 days    | 95+ years | 0  | 3 | Socio-demographic Index                 |
| Brain and nervous system cancer | Female | 0-6 days    | 95+ years | 0  | 3 | Socio-demographic Index                 |
| Brain and nervous system cancer | Male   | 0-6 days    | 95+ years | -1 | 2 | Healthcare access and quality index     |
| Brain and nervous system cancer | Female | 0-6 days    | 95+ years | -1 | 2 | Healthcare access and quality index     |
| Brain and nervous system cancer | Male   | 0-6 days    | 95+ years | -1 | 3 | Education (years per capita)            |
| Brain and nervous system cancer | Female | 0-6 days    | 95+ years | -1 | 3 | Education (years per capita)            |
| Brain and nervous system cancer | Male   | 0-6 days    | 95+ years | 1  | 1 | Alcohol (liters per capita)             |
| Brain and nervous system cancer | Female | 0-6 days    | 95+ years | 1  | 1 | Alcohol (liters per capita)             |
| Brain and nervous system cancer | Male   | 0-6 days    | 95+ years | 1  | 1 | Smoking Prevalence                      |
| Brain and nervous system cancer | Female | 0-6 days    | 95+ years | 1  | 1 | Smoking Prevalence                      |
| Brain and nervous system cancer | Male   | 0-6 days    | 95+ years | -1 | 2 | fruits adjusted (g)                     |

|                                 |        |             |           |    |   |                                      |
|---------------------------------|--------|-------------|-----------|----|---|--------------------------------------|
| Brain and nervous system cancer | Female | 0-6 days    | 95+ years | -1 | 2 | fruits adjusted (g)                  |
| Brain and nervous system cancer | Male   | 0-6 days    | 95+ years | -1 | 2 | vegetables adjusted (g)              |
| Brain and nervous system cancer | Female | 0-6 days    | 95+ years | -1 | 2 | vegetables adjusted (g)              |
| Brain and nervous system cancer | Male   | 0-6 days    | 95+ years | 1  | 1 | Cumulative Cigarettes (10 Years)     |
| Brain and nervous system cancer | Female | 0-6 days    | 95+ years | 1  | 1 | Cumulative Cigarettes (10 Years)     |
| Brain and nervous system cancer | Male   | 0-6 days    | 95+ years | 1  | 1 | Cumulative Cigarettes (15 Years)     |
| Brain and nervous system cancer | Female | 0-6 days    | 95+ years | 1  | 1 | Cumulative Cigarettes (15 Years)     |
| Brain and nervous system cancer | Male   | 0-6 days    | 95+ years | 1  | 2 | red meats adjusted (g)               |
| Brain and nervous system cancer | Female | 0-6 days    | 95+ years | 1  | 2 | red meats adjusted (g)               |
| Brain and nervous system cancer | Male   | 0-6 days    | 95+ years | 1  | 2 | Systolic Blood Pressure (mmHg)       |
| Brain and nervous system cancer | Female | 0-6 days    | 95+ years | 1  | 2 | Systolic Blood Pressure (mmHg)       |
| Brain and nervous system cancer | Male   | 0-6 days    | 95+ years | 1  | 2 | Cholesterol (total, mean per capita) |
| Brain and nervous system cancer | Female | 0-6 days    | 95+ years | 1  | 2 | Cholesterol (total, mean per capita) |
| Breast cancer                   | Male   | 15-19 years | 95+ years | 0  | 3 | LDI (I\$ per capita)                 |
| Breast cancer                   | Female | 15-19 years | 95+ years | 0  | 3 | LDI (I\$ per capita)                 |
| Breast cancer                   | Male   | 15-19 years | 95+ years | 0  | 3 | Socio-demographic Index              |
| Breast cancer                   | Female | 15-19 years | 95+ years | 0  | 3 | Socio-demographic Index              |
| Breast cancer                   | Male   | 15-19 years | 95+ years | -1 | 2 | Healthcare access and quality index  |
| Breast cancer                   | Female | 15-19 years | 95+ years | -1 | 2 | Healthcare access and quality index  |
| Breast cancer                   | Male   | 15-19 years | 95+ years | -1 | 3 | Education (years per capita)         |
| Breast cancer                   | Female | 15-19 years | 95+ years | -1 | 3 | Education (years per capita)         |
| Breast cancer                   | Male   | 15-19 years | 95+ years | 1  | 1 | Mean BMI                             |
| Breast cancer                   | Female | 15-19 years | 95+ years | 1  | 1 | Mean BMI                             |
| Breast cancer                   | Male   | 15-19 years | 95+ years | 1  | 1 | Alcohol (liters per capita)          |
| Breast cancer                   | Female | 15-19 years | 95+ years | 1  | 1 | Alcohol (liters per capita)          |
| Breast cancer                   | Male   | 15-19 years | 95+ years | 1  | 2 | Smoking Prevalence                   |
| Breast cancer                   | Female | 15-19 years | 95+ years | 1  | 2 | Smoking Prevalence                   |
| Breast cancer                   | Female | 15-19 years | 95+ years | -1 | 2 | Total Fertility Rate                 |
| Breast cancer                   | Female | 15-19 years | 95+ years | -1 | 2 | Age-Specific Fertility Rate          |
| Breast cancer                   | Male   | 15-19 years | 95+ years | -1 | 2 | fruits adjusted (g)                  |
| Breast cancer                   | Female | 15-19 years | 95+ years | -1 | 2 | fruits adjusted (g)                  |
| Breast cancer                   | Male   | 15-19 years | 95+ years | -1 | 2 | vegetables adjusted (g)              |
| Breast cancer                   | Female | 15-19 years | 95+ years | -1 | 2 | vegetables adjusted (g)              |

|                           |        |             |           |    |   |                                      |
|---------------------------|--------|-------------|-----------|----|---|--------------------------------------|
| Breast cancer             | Male   | 15-19 years | 95+ years | 1  | 2 | Cumulative Cigarettes (10 Years)     |
| Breast cancer             | Female | 15-19 years | 95+ years | 1  | 2 | Cumulative Cigarettes (10 Years)     |
| Breast cancer             | Male   | 15-19 years | 95+ years | 1  | 2 | Cumulative Cigarettes (15 Years)     |
| Breast cancer             | Female | 15-19 years | 95+ years | 1  | 2 | Cumulative Cigarettes (15 Years)     |
| Breast cancer             | Male   | 15-19 years | 95+ years | 1  | 2 | Cumulative Cigarettes (20 Years)     |
| Breast cancer             | Female | 15-19 years | 95+ years | 1  | 2 | Cumulative Cigarettes (20 Years)     |
| Breast cancer             | Male   | 15-19 years | 95+ years | 1  | 2 | Cumulative Cigarettes (5 Years)      |
| Breast cancer             | Female | 15-19 years | 95+ years | 1  | 2 | Cumulative Cigarettes (5 Years)      |
| Breast cancer             | Male   | 15-19 years | 95+ years | 1  | 1 | Log-transformed SEV scalar: Breast C |
| Breast cancer             | Female | 15-19 years | 95+ years | 1  | 1 | Log-transformed SEV scalar: Breast C |
| Cervical cancer           | Female | 15-19 years | 95+ years | 0  | 3 | LDI (I\$ per capita)                 |
| Cervical cancer           | Female | 15-19 years | 95+ years | 0  | 3 | Socio-demographic Index              |
| Cervical cancer           | Female | 15-19 years | 95+ years | -1 | 2 | Healthcare access and quality index  |
| Cervical cancer           | Female | 15-19 years | 95+ years | -1 | 3 | Education (years per capita)         |
| Cervical cancer           | Female | 15-19 years | 95+ years | 1  | 2 | Smoking Prevalence                   |
| Cervical cancer           | Female | 15-19 years | 95+ years | 1  | 2 | Total Fertility Rate                 |
| Cervical cancer           | Female | 15-19 years | 95+ years | 1  | 2 | Age-Specific Fertility Rate          |
| Cervical cancer           | Female | 15-19 years | 95+ years | -1 | 2 | fruits adjusted (g)                  |
| Cervical cancer           | Female | 15-19 years | 95+ years | -1 | 2 | vegetables adjusted (g)              |
| Cervical cancer           | Female | 15-19 years | 95+ years | 1  | 1 | Cumulative Cigarettes (10 Years)     |
| Cervical cancer           | Female | 15-19 years | 95+ years | 1  | 1 | Cumulative Cigarettes (15 Years)     |
| Cervical cancer           | Female | 15-19 years | 95+ years | 1  | 1 | Cumulative Cigarettes (5 Years)      |
| Cervical cancer           | Female | 15-19 years | 95+ years | 1  | 1 | HIV age-standardized prevalence      |
| Chronic lymphoid leukemia | Female | 15-19 years | 95+ years | 0  | 3 | LDI (I\$ per capita)                 |
| Chronic lymphoid leukemia | Male   | 15-19 years | 95+ years | 0  | 3 | LDI (I\$ per capita)                 |
| Chronic lymphoid leukemia | Female | 15-19 years | 95+ years | 0  | 3 | Socio-demographic Index              |
| Chronic lymphoid leukemia | Male   | 15-19 years | 95+ years | 0  | 3 | Socio-demographic Index              |
| Chronic lymphoid leukemia | Female | 15-19 years | 95+ years | -1 | 2 | Healthcare access and quality index  |
| Chronic lymphoid leukemia | Female | 15-19 years | 95+ years | 1  | 1 | Healthcare access and quality index  |
| Chronic lymphoid leukemia | Male   | 15-19 years | 95+ years | -1 | 2 | Healthcare access and quality index  |
| Chronic lymphoid leukemia | Female | 15-19 years | 95+ years | -1 | 3 | Education (years per capita)         |
| Chronic lymphoid leukemia | Male   | 15-19 years | 95+ years | -1 | 3 | Education (years per capita)         |
| Chronic lymphoid leukemia | Female | 15-19 years | 95+ years | 1  | 2 | Alcohol (liters per capita)          |

|                           |        |             |           |    |   |                                                       |
|---------------------------|--------|-------------|-----------|----|---|-------------------------------------------------------|
| Chronic lymphoid leukemia | Male   | 15-19 years | 95+ years | 1  | 2 | Alcohol (liters per capita)                           |
| Chronic lymphoid leukemia | Female | 15-19 years | 95+ years | 1  | 2 | Smoking Prevalence                                    |
| Chronic lymphoid leukemia | Male   | 15-19 years | 95+ years | 1  | 2 | Smoking Prevalence                                    |
| Chronic lymphoid leukemia | Female | 15-19 years | 95+ years | 1  | 2 | Tobacco (cigarettes per capita)                       |
| Chronic lymphoid leukemia | Male   | 15-19 years | 95+ years | 1  | 2 | Tobacco (cigarettes per capita)                       |
| Chronic lymphoid leukemia | Female | 15-19 years | 95+ years | 1  | 2 | Cumulative Cigarettes (10 Years)                      |
| Chronic lymphoid leukemia | Male   | 15-19 years | 95+ years | 1  | 2 | Cumulative Cigarettes (10 Years)                      |
| Chronic lymphoid leukemia | Female | 15-19 years | 95+ years | 1  | 2 | Cumulative Cigarettes (15 Years)                      |
| Chronic lymphoid leukemia | Male   | 15-19 years | 95+ years | 1  | 2 | Cumulative Cigarettes (15 Years)                      |
| Chronic lymphoid leukemia | Female | 15-19 years | 95+ years | 1  | 2 | Cumulative Cigarettes (20 Years)                      |
| Chronic lymphoid leukemia | Male   | 15-19 years | 95+ years | 1  | 2 | Cumulative Cigarettes (20 Years)                      |
| Chronic lymphoid leukemia | Female | 15-19 years | 95+ years | 1  | 2 | Cumulative Cigarettes (5 Years)                       |
| Chronic lymphoid leukemia | Male   | 15-19 years | 95+ years | 1  | 2 | Cumulative Cigarettes (5 Years)                       |
| Chronic lymphoid leukemia | Female | 15-19 years | 95+ years | 1  | 1 | Log-transformed SEV scalar: Leukemia                  |
| Chronic lymphoid leukemia | Male   | 15-19 years | 95+ years | 1  | 1 | Log-transformed SEV scalar: Leukemia                  |
| Chronic lymphoid leukemia | Female | 15-19 years | 95+ years | 1  | 1 | Log-transformed age-standardized SEV scalar: Leukemia |
| Chronic lymphoid leukemia | Male   | 15-19 years | 95+ years | 1  | 1 | Log-transformed age-standardized SEV scalar: Leukemia |
| Chronic myeloid leukemia  | Female | 28-364 days | 95+ years | 0  | 3 | LDI (I\$ per capita)                                  |
| Chronic myeloid leukemia  | Male   | 28-364 days | 95+ years | 0  | 3 | LDI (I\$ per capita)                                  |
| Chronic myeloid leukemia  | Female | 28-364 days | 95+ years | 0  | 3 | Socio-demographic Index                               |
| Chronic myeloid leukemia  | Male   | 28-364 days | 95+ years | 0  | 3 | Socio-demographic Index                               |
| Chronic myeloid leukemia  | Female | 28-364 days | 95+ years | -1 | 2 | Healthcare access and quality index                   |
| Chronic myeloid leukemia  | Male   | 28-364 days | 95+ years | -1 | 2 | Healthcare access and quality index                   |
| Chronic myeloid leukemia  | Female | 28-364 days | 95+ years | -1 | 3 | Education (years per capita)                          |
| Chronic myeloid leukemia  | Male   | 28-364 days | 95+ years | -1 | 3 | Education (years per capita)                          |
| Chronic myeloid leukemia  | Female | 28-364 days | 95+ years | 1  | 2 | Alcohol (liters per capita)                           |
| Chronic myeloid leukemia  | Male   | 28-364 days | 95+ years | 1  | 2 | Alcohol (liters per capita)                           |
| Chronic myeloid leukemia  | Female | 28-364 days | 95+ years | 1  | 2 | Smoking Prevalence                                    |
| Chronic myeloid leukemia  | Male   | 28-364 days | 95+ years | 1  | 2 | Smoking Prevalence                                    |
| Chronic myeloid leukemia  | Female | 28-364 days | 95+ years | 1  | 2 | Tobacco (cigarettes per capita)                       |
| Chronic myeloid leukemia  | Male   | 28-364 days | 95+ years | 1  | 2 | Tobacco (cigarettes per capita)                       |

|                          |        |             |           |    |   |                                                       |
|--------------------------|--------|-------------|-----------|----|---|-------------------------------------------------------|
| Chronic myeloid leukemia | Female | 28-364 days | 95+ years | 1  | 2 | Cumulative Cigarettes (10 Years)                      |
| Chronic myeloid leukemia | Male   | 28-364 days | 95+ years | 1  | 2 | Cumulative Cigarettes (10 Years)                      |
| Chronic myeloid leukemia | Female | 28-364 days | 95+ years | 1  | 2 | Cumulative Cigarettes (15 Years)                      |
| Chronic myeloid leukemia | Male   | 28-364 days | 95+ years | 1  | 2 | Cumulative Cigarettes (15 Years)                      |
| Chronic myeloid leukemia | Female | 28-364 days | 95+ years | 1  | 2 | Cumulative Cigarettes (20 Years)                      |
| Chronic myeloid leukemia | Male   | 28-364 days | 95+ years | 1  | 2 | Cumulative Cigarettes (20 Years)                      |
| Chronic myeloid leukemia | Female | 28-364 days | 95+ years | 1  | 2 | Cumulative Cigarettes (5 Years)                       |
| Chronic myeloid leukemia | Male   | 28-364 days | 95+ years | 1  | 2 | Cumulative Cigarettes (5 Years)                       |
| Chronic myeloid leukemia | Female | 28-364 days | 95+ years | 1  | 1 | Log-transformed SEV scalar: Leukemia                  |
| Chronic myeloid leukemia | Male   | 28-364 days | 95+ years | 1  | 1 | Log-transformed SEV scalar: Leukemia                  |
| Chronic myeloid leukemia | Female | 28-364 days | 95+ years | 1  | 1 | Log-transformed age-standardized SEV scalar: Leukemia |
| Chronic myeloid leukemia | Male   | 28-364 days | 95+ years | 1  | 1 | Log-transformed age-standardized SEV scalar: Leukemia |
| Colon and rectum cancer  | Male   | 15-19 years | 95+ years | 0  | 3 | LDI (I\$ per capita)                                  |
| Colon and rectum cancer  | Female | 15-19 years | 95+ years | 0  | 3 | LDI (I\$ per capita)                                  |
| Colon and rectum cancer  | Male   | 15-19 years | 95+ years | 0  | 3 | Socio-demographic Index                               |
| Colon and rectum cancer  | Female | 15-19 years | 95+ years | 0  | 3 | Socio-demographic Index                               |
| Colon and rectum cancer  | Male   | 15-19 years | 95+ years | -1 | 2 | Healthcare access and quality index                   |
| Colon and rectum cancer  | Female | 15-19 years | 95+ years | -1 | 2 | Healthcare access and quality index                   |
| Colon and rectum cancer  | Male   | 15-19 years | 95+ years | -1 | 3 | Education (years per capita)                          |
| Colon and rectum cancer  | Female | 15-19 years | 95+ years | -1 | 3 | Education (years per capita)                          |
| Colon and rectum cancer  | Male   | 15-19 years | 95+ years | 1  | 1 | Mean BMI                                              |
| Colon and rectum cancer  | Female | 15-19 years | 95+ years | 1  | 1 | Mean BMI                                              |
| Colon and rectum cancer  | Male   | 15-19 years | 95+ years | 1  | 1 | Alcohol (liters per capita)                           |
| Colon and rectum cancer  | Female | 15-19 years | 95+ years | 1  | 1 | Alcohol (liters per capita)                           |
| Colon and rectum cancer  | Male   | 15-19 years | 95+ years | 1  | 1 | Smoking Prevalence                                    |
| Colon and rectum cancer  | Female | 15-19 years | 95+ years | 1  | 1 | Smoking Prevalence                                    |
| Colon and rectum cancer  | Male   | 15-19 years | 95+ years | 1  | 1 | Tobacco (cigarettes per capita)                       |
| Colon and rectum cancer  | Female | 15-19 years | 95+ years | 1  | 1 | Tobacco (cigarettes per capita)                       |
| Colon and rectum cancer  | Male   | 15-19 years | 95+ years | -1 | 2 | fruits adjusted (g)                                   |
| Colon and rectum cancer  | Female | 15-19 years | 95+ years | -1 | 2 | fruits adjusted (g)                                   |
| Colon and rectum cancer  | Male   | 15-19 years | 95+ years | -1 | 2 | vegetables adjusted (g)                               |

|                         |        |             |           |    |   |                                                |
|-------------------------|--------|-------------|-----------|----|---|------------------------------------------------|
| Colon and rectum cancer | Female | 15-19 years | 95+ years | -1 | 2 | vegetables adjusted (g)                        |
| Colon and rectum cancer | Male   | 15-19 years | 95+ years | 1  | 2 | Cumulative Cigarettes (10 Years)               |
| Colon and rectum cancer | Female | 15-19 years | 95+ years | 1  | 2 | Cumulative Cigarettes (10 Years)               |
| Colon and rectum cancer | Male   | 15-19 years | 95+ years | 1  | 2 | Cumulative Cigarettes (15 Years)               |
| Colon and rectum cancer | Female | 15-19 years | 95+ years | 1  | 2 | Cumulative Cigarettes (15 Years)               |
| Colon and rectum cancer | Male   | 15-19 years | 95+ years | 1  | 2 | Cumulative Cigarettes (20 Years)               |
| Colon and rectum cancer | Female | 15-19 years | 95+ years | 1  | 2 | Cumulative Cigarettes (20 Years)               |
| Colon and rectum cancer | Male   | 15-19 years | 95+ years | 1  | 2 | Cumulative Cigarettes (5 Years)                |
| Colon and rectum cancer | Female | 15-19 years | 95+ years | 1  | 2 | Cumulative Cigarettes (5 Years)                |
| Colon and rectum cancer | Male   | 15-19 years | 95+ years | 1  | 1 | red meats adjusted (g)                         |
| Colon and rectum cancer | Female | 15-19 years | 95+ years | 1  | 1 | red meats adjusted (g)                         |
| Colon and rectum cancer | Male   | 15-19 years | 95+ years | 1  | 2 | Diabetes Age-Specific Prevalence (proportion)  |
| Colon and rectum cancer | Female | 15-19 years | 95+ years | 1  | 2 | Diabetes Age-Specific Prevalence (proportion)  |
| Colon and rectum cancer | Male   | 15-19 years | 95+ years | 1  | 1 | Log-transformed SEV scalar: Colorect C         |
| Colon and rectum cancer | Female | 15-19 years | 95+ years | 1  | 1 | Log-transformed SEV scalar: Colorect C         |
| Colon and rectum cancer | Male   | 15-19 years | 95+ years | -1 | 2 | milk adjusted (g)                              |
| Colon and rectum cancer | Female | 15-19 years | 95+ years | -1 | 2 | milk adjusted (g)                              |
| Colon and rectum cancer | Male   | 15-19 years | 95+ years | -1 | 2 | nuts seeds adjusted (g)                        |
| Colon and rectum cancer | Female | 15-19 years | 95+ years | -1 | 2 | nuts seeds adjusted (g)                        |
| Colon and rectum cancer | Male   | 15-19 years | 95+ years | -1 | 2 | pufa adjusted(percent)                         |
| Colon and rectum cancer | Female | 15-19 years | 95+ years | -1 | 2 | pufa adjusted(percent)                         |
| Esophageal cancer       | Male   | 15-19 years | 95+ years | 0  | 3 | LDI (I\$ per capita)                           |
| Esophageal cancer       | Female | 15-19 years | 95+ years | 0  | 3 | LDI (I\$ per capita)                           |
| Esophageal cancer       | Male   | 15-19 years | 95+ years | -1 | 2 | Sanitation (proportion with access)            |
| Esophageal cancer       | Female | 15-19 years | 95+ years | -1 | 2 | Sanitation (proportion with access)            |
| Esophageal cancer       | Male   | 15-19 years | 95+ years | -1 | 2 | Improved Water Source (proportion with access) |
| Esophageal cancer       | Female | 15-19 years | 95+ years | -1 | 2 | Improved Water Source (proportion with access) |
| Esophageal cancer       | Male   | 15-19 years | 95+ years | 0  | 3 | Socio-demographic Index                        |
| Esophageal cancer       | Female | 15-19 years | 95+ years | 0  | 3 | Socio-demographic Index                        |

|                                      |        |             |           |    |   |                                                        |
|--------------------------------------|--------|-------------|-----------|----|---|--------------------------------------------------------|
| Esophageal cancer                    | Male   | 15-19 years | 95+ years | -1 | 2 | Healthcare access and quality index                    |
| Esophageal cancer                    | Female | 15-19 years | 95+ years | -1 | 2 | Healthcare access and quality index                    |
| Esophageal cancer                    | Male   | 15-19 years | 95+ years | -1 | 3 | Education (years per capita)                           |
| Esophageal cancer                    | Female | 15-19 years | 95+ years | -1 | 3 | Education (years per capita)                           |
| Esophageal cancer                    | Male   | 15-19 years | 95+ years | 1  | 1 | Mean BMI                                               |
| Esophageal cancer                    | Female | 15-19 years | 95+ years | 1  | 1 | Mean BMI                                               |
| Esophageal cancer                    | Male   | 15-19 years | 95+ years | 1  | 2 | Indoor Air Pollution (All Cooking Fuels)               |
| Esophageal cancer                    | Female | 15-19 years | 95+ years | 1  | 2 | Indoor Air Pollution (All Cooking Fuels)               |
| Esophageal cancer                    | Male   | 15-19 years | 95+ years | 1  | 1 | Alcohol (liters per capita)                            |
| Esophageal cancer                    | Female | 15-19 years | 95+ years | 1  | 1 | Alcohol (liters per capita)                            |
| Esophageal cancer                    | Male   | 15-19 years | 95+ years | 1  | 1 | Smoking Prevalence                                     |
| Esophageal cancer                    | Female | 15-19 years | 95+ years | 1  | 1 | Smoking Prevalence                                     |
| Esophageal cancer                    | Male   | 15-19 years | 95+ years | 1  | 1 | Tobacco (cigarettes per capita)                        |
| Esophageal cancer                    | Female | 15-19 years | 95+ years | 1  | 1 | Tobacco (cigarettes per capita)                        |
| Esophageal cancer                    | Male   | 15-19 years | 95+ years | 1  | 1 | Log-transformed SEV scalar: Esophag C                  |
| Esophageal cancer                    | Female | 15-19 years | 95+ years | 1  | 1 | Log-transformed SEV scalar: Esophag C                  |
| Esophageal cancer                    | Male   | 15-19 years | 95+ years | 1  | 1 | Log-transformed age-standardized SEV scalar: Esophag C |
| Esophageal cancer                    | Female | 15-19 years | 95+ years | 1  | 1 | Log-transformed age-standardized SEV scalar: Esophag C |
| Esophageal cancer                    | Male   | 15-19 years | 95+ years | -1 | 1 | fruits adjusted (g)                                    |
| Esophageal cancer                    | Female | 15-19 years | 95+ years | -1 | 1 | fruits adjusted (g)                                    |
| Esophageal cancer                    | Male   | 15-19 years | 95+ years | -1 | 2 | vegetables adjusted (g)                                |
| Esophageal cancer                    | Female | 15-19 years | 95+ years | -1 | 2 | vegetables adjusted (g)                                |
| Gallbladder and biliary tract cancer | Male   | 15-19 years | 95+ years | 0  | 3 | LDI (I\$ per capita)                                   |
| Gallbladder and biliary tract cancer | Female | 15-19 years | 95+ years | 0  | 3 | LDI (I\$ per capita)                                   |
| Gallbladder and biliary tract cancer | Male   | 15-19 years | 95+ years | 0  | 3 | Socio-demographic Index                                |
| Gallbladder and biliary tract cancer | Female | 15-19 years | 95+ years | 0  | 3 | Socio-demographic Index                                |
| Gallbladder and biliary tract cancer | Male   | 15-19 years | 95+ years | -1 | 2 | Healthcare access and quality index                    |
| Gallbladder and biliary tract cancer | Female | 15-19 years | 95+ years | -1 | 2 | Healthcare access and quality index                    |
| Gallbladder and biliary tract cancer | Male   | 15-19 years | 95+ years | -1 | 3 | Education (years per capita)                           |
| Gallbladder and biliary tract cancer | Female | 15-19 years | 95+ years | -1 | 3 | Education (years per capita)                           |
| Gallbladder and biliary tract cancer | Male   | 15-19 years | 95+ years | 1  | 1 | Mean BMI                                               |

|                                      |        |             |           |    |   |                                                   |
|--------------------------------------|--------|-------------|-----------|----|---|---------------------------------------------------|
| Gallbladder and biliary tract cancer | Female | 15-19 years | 95+ years | 1  | 1 | Mean BMI                                          |
| Gallbladder and biliary tract cancer | Male   | 15-19 years | 95+ years | 1  | 2 | Alcohol (liters per capita)                       |
| Gallbladder and biliary tract cancer | Female | 15-19 years | 95+ years | 1  | 2 | Alcohol (liters per capita)                       |
| Gallbladder and biliary tract cancer | Male   | 15-19 years | 95+ years | 1  | 2 | Smoking Prevalence                                |
| Gallbladder and biliary tract cancer | Female | 15-19 years | 95+ years | 1  | 2 | Smoking Prevalence                                |
| Gallbladder and biliary tract cancer | Male   | 15-19 years | 95+ years | 1  | 2 | Tobacco (cigarettes per capita)                   |
| Gallbladder and biliary tract cancer | Female | 15-19 years | 95+ years | 1  | 2 | Tobacco (cigarettes per capita)                   |
| Gallbladder and biliary tract cancer | Male   | 15-19 years | 95+ years | -1 | 2 | fruits adjusted (g)                               |
| Gallbladder and biliary tract cancer | Female | 15-19 years | 95+ years | -1 | 2 | fruits adjusted (g)                               |
| Gallbladder and biliary tract cancer | Male   | 15-19 years | 95+ years | -1 | 2 | vegetables adjusted (g)                           |
| Gallbladder and biliary tract cancer | Female | 15-19 years | 95+ years | -1 | 2 | vegetables adjusted (g)                           |
| Gallbladder and biliary tract cancer | Male   | 15-19 years | 95+ years | 1  | 2 | Cumulative Cigarettes (10 Years)                  |
| Gallbladder and biliary tract cancer | Female | 15-19 years | 95+ years | 1  | 2 | Cumulative Cigarettes (10 Years)                  |
| Gallbladder and biliary tract cancer | Male   | 15-19 years | 95+ years | 1  | 2 | Cumulative Cigarettes (5 Years)                   |
| Gallbladder and biliary tract cancer | Female | 15-19 years | 95+ years | 1  | 2 | Cumulative Cigarettes (5 Years)                   |
| Gallbladder and biliary tract cancer | Male   | 15-19 years | 95+ years | 1  | 2 | Diabetes Age-Standardized Prevalence (proportion) |
| Gallbladder and biliary tract cancer | Female | 15-19 years | 95+ years | 1  | 2 | Diabetes Age-Standardized Prevalence (proportion) |
| Gallbladder and biliary tract cancer | Male   | 15-19 years | 95+ years | 1  | 1 | Log-transformed SEV scalar: Gallblad C            |
| Gallbladder and biliary tract cancer | Female | 15-19 years | 95+ years | 1  | 1 | Log-transformed SEV scalar: Gallblad C            |
| Hodgkin lymphoma                     | Male   | 0-6 days    | 95+ years | 0  | 3 | LDI (I\$ per capita)                              |
| Hodgkin lymphoma                     | Female | 0-6 days    | 95+ years | 0  | 3 | LDI (I\$ per capita)                              |
| Hodgkin lymphoma                     | Male   | 0-6 days    | 95+ years | 0  | 3 | Socio-demographic Index                           |
| Hodgkin lymphoma                     | Female | 0-6 days    | 95+ years | 0  | 3 | Socio-demographic Index                           |
| Hodgkin lymphoma                     | Male   | 0-6 days    | 95+ years | -1 | 2 | Healthcare access and quality index               |
| Hodgkin lymphoma                     | Female | 0-6 days    | 95+ years | -1 | 2 | Healthcare access and quality index               |
| Hodgkin lymphoma                     | Male   | 0-6 days    | 95+ years | -1 | 3 | Education (years per capita)                      |
| Hodgkin lymphoma                     | Female | 0-6 days    | 95+ years | -1 | 3 | Education (years per capita)                      |
| Kidney cancer                        | Male   | 0-6 days    | 95+ years | 0  | 3 | LDI (I\$ per capita)                              |
| Kidney cancer                        | Female | 0-6 days    | 95+ years | 0  | 3 | LDI (I\$ per capita)                              |
| Kidney cancer                        | Male   | 0-6 days    | 95+ years | 0  | 3 | Socio-demographic Index                           |
| Kidney cancer                        | Female | 0-6 days    | 95+ years | 0  | 3 | Socio-demographic Index                           |



|               |        |             |           |    |   |                                                   |
|---------------|--------|-------------|-----------|----|---|---------------------------------------------------|
| Kidney cancer | Male   | 0-6 days    | 95+ years | -1 | 2 | Healthcare access and quality index               |
| Kidney cancer | Female | 0-6 days    | 95+ years | -1 | 2 | Healthcare access and quality index               |
| Kidney cancer | Male   | 0-6 days    | 95+ years | -1 | 3 | Education (years per capita)                      |
| Kidney cancer | Female | 0-6 days    | 95+ years | -1 | 3 | Education (years per capita)                      |
| Kidney cancer | Male   | 0-6 days    | 95+ years | 1  | 1 | Mean BMI                                          |
| Kidney cancer | Female | 0-6 days    | 95+ years | 1  | 1 | Mean BMI                                          |
| Kidney cancer | Male   | 0-6 days    | 95+ years | 1  | 2 | Alcohol (liters per capita)                       |
| Kidney cancer | Female | 0-6 days    | 95+ years | 1  | 2 | Alcohol (liters per capita)                       |
| Kidney cancer | Male   | 0-6 days    | 95+ years | 1  | 2 | Smoking Prevalence                                |
| Kidney cancer | Female | 0-6 days    | 95+ years | 1  | 2 | Smoking Prevalence                                |
| Kidney cancer | Male   | 0-6 days    | 95+ years | 1  | 1 | Cumulative Cigarettes (10 Years)                  |
| Kidney cancer | Female | 0-6 days    | 95+ years | 1  | 1 | Cumulative Cigarettes (10 Years)                  |
| Kidney cancer | Male   | 0-6 days    | 95+ years | 1  | 1 | Cumulative Cigarettes (15 Years)                  |
| Kidney cancer | Female | 0-6 days    | 95+ years | 1  | 1 | Cumulative Cigarettes (15 Years)                  |
| Kidney cancer | Male   | 0-6 days    | 95+ years | 1  | 1 | Cumulative Cigarettes (5 Years)                   |
| Kidney cancer | Female | 0-6 days    | 95+ years | 1  | 1 | Cumulative Cigarettes (5 Years)                   |
| Kidney cancer | Male   | 0-6 days    | 95+ years | 1  | 2 | Diabetes Age-Standardized Prevalence (proportion) |
| Kidney cancer | Female | 0-6 days    | 95+ years | 1  | 2 | Diabetes Age-Standardized Prevalence (proportion) |
| Kidney cancer | Male   | 0-6 days    | 95+ years | 1  | 2 | Systolic Blood Pressure (mmHg)                    |
| Kidney cancer | Female | 0-6 days    | 95+ years | 1  | 2 | Systolic Blood Pressure (mmHg)                    |
| Kidney cancer | Male   | 0-6 days    | 95+ years | 1  | 1 | Log-transformed SEV scalar: Kidney C              |
| Kidney cancer | Female | 0-6 days    | 95+ years | 1  | 1 | Log-transformed SEV scalar: Kidney C              |
| Larynx cancer | Male   | 15-19 years | 95+ years | 0  | 3 | LDI (I\$ per capita)                              |
| Larynx cancer | Female | 15-19 years | 95+ years | 0  | 3 | LDI (I\$ per capita)                              |
| Larynx cancer | Male   | 15-19 years | 95+ years | 0  | 3 | Socio-demographic Index                           |
| Larynx cancer | Female | 15-19 years | 95+ years | 0  | 3 | Socio-demographic Index                           |
| Larynx cancer | Male   | 15-19 years | 95+ years | -1 | 2 | Healthcare access and quality index               |
| Larynx cancer | Female | 15-19 years | 95+ years | -1 | 2 | Healthcare access and quality index               |
| Larynx cancer | Male   | 15-19 years | 95+ years | -1 | 3 | Education (years per capita)                      |
| Larynx cancer | Female | 15-19 years | 95+ years | -1 | 3 | Education (years per capita)                      |

|               |        |             |           |    |   |                                                     |
|---------------|--------|-------------|-----------|----|---|-----------------------------------------------------|
| Larynx cancer | Male   | 15-19 years | 95+ years | 1  | 2 | Population Density (over 1000 ppl/sqkm, proportion) |
| Larynx cancer | Female | 15-19 years | 95+ years | 1  | 2 | Population Density (over 1000 ppl/sqkm, proportion) |
| Larynx cancer | Male   | 15-19 years | 95+ years | 1  | 1 | Alcohol (liters per capita)                         |
| Larynx cancer | Female | 15-19 years | 95+ years | 1  | 1 | Alcohol (liters per capita)                         |
| Larynx cancer | Male   | 15-19 years | 95+ years | 1  | 2 | Smoking Prevalence                                  |
| Larynx cancer | Female | 15-19 years | 95+ years | 1  | 2 | Smoking Prevalence                                  |
| Larynx cancer | Male   | 15-19 years | 95+ years | 1  | 2 | Population Density (under 150 ppl/sqkm, proportion) |
| Larynx cancer | Female | 15-19 years | 95+ years | 1  | 2 | Population Density (under 150 ppl/sqkm, proportion) |
| Larynx cancer | Male   | 15-19 years | 95+ years | 1  | 2 | Tobacco (cigarettes per capita)                     |
| Larynx cancer | Female | 15-19 years | 95+ years | 1  | 2 | Tobacco (cigarettes per capita)                     |
| Larynx cancer | Male   | 15-19 years | 95+ years | -1 | 2 | fruits adjusted (g)                                 |
| Larynx cancer | Female | 15-19 years | 95+ years | -1 | 2 | fruits adjusted (g)                                 |
| Larynx cancer | Male   | 15-19 years | 95+ years | -1 | 2 | vegetables adjusted (g)                             |
| Larynx cancer | Female | 15-19 years | 95+ years | -1 | 2 | vegetables adjusted (g)                             |
| Larynx cancer | Male   | 15-19 years | 95+ years | 1  | 2 | Cumulative Cigarettes (10 Years)                    |
| Larynx cancer | Female | 15-19 years | 95+ years | 1  | 2 | Cumulative Cigarettes (10 Years)                    |
| Larynx cancer | Male   | 15-19 years | 95+ years | 1  | 2 | Cumulative Cigarettes (15 Years)                    |
| Larynx cancer | Female | 15-19 years | 95+ years | 1  | 2 | Cumulative Cigarettes (15 Years)                    |
| Larynx cancer | Male   | 15-19 years | 95+ years | 1  | 2 | Cumulative Cigarettes (20 Years)                    |
| Larynx cancer | Female | 15-19 years | 95+ years | 1  | 2 | Cumulative Cigarettes (20 Years)                    |
| Larynx cancer | Male   | 15-19 years | 95+ years | 1  | 2 | Cumulative Cigarettes (5 Years)                     |
| Larynx cancer | Female | 15-19 years | 95+ years | 1  | 2 | Cumulative Cigarettes (5 Years)                     |
| Larynx cancer | Male   | 15-19 years | 95+ years | 1  | 1 | Log-transformed SEV scalar: Larynx C                |
| Larynx cancer | Female | 15-19 years | 95+ years | 1  | 1 | Log-transformed SEV scalar: Larynx C                |
| Leukemia      | Male   | 0-6 days    | 95+ years | 0  | 3 | LDI (I\$ per capita)                                |
| Leukemia      | Female | 0-6 days    | 95+ years | 0  | 3 | LDI (I\$ per capita)                                |
| Leukemia      | Male   | 0-6 days    | 95+ years | 0  | 3 | Socio-demographic Index                             |
| Leukemia      | Female | 0-6 days    | 95+ years | 0  | 3 | Socio-demographic Index                             |
| Leukemia      | Male   | 0-6 days    | 95+ years | -1 | 2 | Healthcare access and quality index                 |

|                            |        |             |           |    |   |                                                       |
|----------------------------|--------|-------------|-----------|----|---|-------------------------------------------------------|
| Leukemia                   | Female | 0-6 days    | 95+ years | -1 | 2 | Healthcare access and quality index                   |
| Leukemia                   | Male   | 0-6 days    | 95+ years | -1 | 3 | Education (years per capita)                          |
| Leukemia                   | Female | 0-6 days    | 95+ years | -1 | 3 | Education (years per capita)                          |
| Leukemia                   | Male   | 0-6 days    | 95+ years | 1  | 2 | Alcohol (liters per capita)                           |
| Leukemia                   | Female | 0-6 days    | 95+ years | 1  | 2 | Alcohol (liters per capita)                           |
| Leukemia                   | Male   | 0-6 days    | 95+ years | 1  | 2 | Smoking Prevalence                                    |
| Leukemia                   | Female | 0-6 days    | 95+ years | 1  | 2 | Smoking Prevalence                                    |
| Leukemia                   | Male   | 0-6 days    | 95+ years | 1  | 2 | Tobacco (cigarettes per capita)                       |
| Leukemia                   | Female | 0-6 days    | 95+ years | 1  | 2 | Tobacco (cigarettes per capita)                       |
| Leukemia                   | Male   | 0-6 days    | 95+ years | 1  | 2 | Cumulative Cigarettes (10 Years)                      |
| Leukemia                   | Female | 0-6 days    | 95+ years | 1  | 2 | Cumulative Cigarettes (10 Years)                      |
| Leukemia                   | Male   | 0-6 days    | 95+ years | 1  | 2 | Cumulative Cigarettes (15 Years)                      |
| Leukemia                   | Female | 0-6 days    | 95+ years | 1  | 2 | Cumulative Cigarettes (15 Years)                      |
| Leukemia                   | Male   | 0-6 days    | 95+ years | 1  | 2 | Cumulative Cigarettes (20 Years)                      |
| Leukemia                   | Female | 0-6 days    | 95+ years | 1  | 2 | Cumulative Cigarettes (20 Years)                      |
| Leukemia                   | Male   | 0-6 days    | 95+ years | 1  | 2 | Cumulative Cigarettes (5 Years)                       |
| Leukemia                   | Female | 0-6 days    | 95+ years | 1  | 2 | Cumulative Cigarettes (5 Years)                       |
| Leukemia                   | Male   | 0-6 days    | 95+ years | 1  | 1 | Log-transformed SEV scalar: Leukemia                  |
| Leukemia                   | Female | 0-6 days    | 95+ years | 1  | 1 | Log-transformed SEV scalar: Leukemia                  |
| Leukemia                   | Male   | 0-6 days    | 95+ years | 1  | 1 | Log-transformed age-standardized SEV scalar: Leukemia |
| Leukemia                   | Female | 0-6 days    | 95+ years | 1  | 1 | Log-transformed age-standardized SEV scalar: Leukemia |
| Lip and oral cavity cancer | Male   | 15-19 years | 95+ years | 0  | 3 | LDI (I\$ per capita)                                  |
| Lip and oral cavity cancer | Female | 15-19 years | 95+ years | 0  | 3 | LDI (I\$ per capita)                                  |
| Lip and oral cavity cancer | Male   | 15-19 years | 95+ years | 0  | 3 | Socio-demographic Index                               |
| Lip and oral cavity cancer | Female | 15-19 years | 95+ years | 0  | 3 | Socio-demographic Index                               |
| Lip and oral cavity cancer | Male   | 15-19 years | 95+ years | -1 | 2 | Healthcare access and quality index                   |
| Lip and oral cavity cancer | Female | 15-19 years | 95+ years | -1 | 2 | Healthcare access and quality index                   |
| Lip and oral cavity cancer | Male   | 15-19 years | 95+ years | -1 | 3 | Education (years per capita)                          |
| Lip and oral cavity cancer | Female | 15-19 years | 95+ years | -1 | 3 | Education (years per capita)                          |
| Lip and oral cavity cancer | Male   | 15-19 years | 95+ years | 1  | 1 | Alcohol (liters per capita)                           |
| Lip and oral cavity cancer | Female | 15-19 years | 95+ years | 1  | 1 | Alcohol (liters per capita)                           |

|                            |        |             |           |    |   |                                     |
|----------------------------|--------|-------------|-----------|----|---|-------------------------------------|
| Lip and oral cavity cancer | Male   | 15-19 years | 95+ years | 1  | 1 | Smoking Prevalence                  |
| Lip and oral cavity cancer | Female | 15-19 years | 95+ years | 1  | 1 | Smoking Prevalence                  |
| Lip and oral cavity cancer | Female | 15-19 years | 95+ years | -1 | 2 | Health System Access 2 (unitless)   |
| Lip and oral cavity cancer | Male   | 15-19 years | 95+ years | 1  | 1 | Tobacco (cigarettes per capita)     |
| Lip and oral cavity cancer | Female | 15-19 years | 95+ years | 1  | 1 | Tobacco (cigarettes per capita)     |
| Lip and oral cavity cancer | Male   | 15-19 years | 95+ years | -1 | 2 | fruits adjusted (g)                 |
| Lip and oral cavity cancer | Female | 15-19 years | 95+ years | -1 | 2 | fruits adjusted (g)                 |
| Lip and oral cavity cancer | Male   | 15-19 years | 95+ years | -1 | 1 | vegetables adjusted (g)             |
| Lip and oral cavity cancer | Female | 15-19 years | 95+ years | -1 | 1 | vegetables adjusted (g)             |
| Lip and oral cavity cancer | Male   | 15-19 years | 95+ years | 1  | 1 | Cumulative Cigarettes (10 Years)    |
| Lip and oral cavity cancer | Female | 15-19 years | 95+ years | 1  | 1 | Cumulative Cigarettes (10 Years)    |
| Lip and oral cavity cancer | Male   | 15-19 years | 95+ years | 1  | 1 | Cumulative Cigarettes (15 Years)    |
| Lip and oral cavity cancer | Female | 15-19 years | 95+ years | 1  | 1 | Cumulative Cigarettes (15 Years)    |
| Lip and oral cavity cancer | Male   | 15-19 years | 95+ years | 1  | 1 | Cumulative Cigarettes (20 Years)    |
| Lip and oral cavity cancer | Female | 15-19 years | 95+ years | 1  | 1 | Cumulative Cigarettes (20 Years)    |
| Lip and oral cavity cancer | Male   | 15-19 years | 95+ years | 1  | 1 | Cumulative Cigarettes (5 Years)     |
| Lip and oral cavity cancer | Female | 15-19 years | 95+ years | 1  | 1 | Cumulative Cigarettes (5 Years)     |
| Lip and oral cavity cancer | Male   | 15-19 years | 95+ years | 1  | 2 | red meats adjusted (g)              |
| Lip and oral cavity cancer | Female | 15-19 years | 95+ years | 1  | 2 | red meats adjusted (g)              |
| Lip and oral cavity cancer | Male   | 15-19 years | 95+ years | 1  | 1 | Log-transformed SEV scalar: Mouth C |
| Lip and oral cavity cancer | Female | 15-19 years | 95+ years | 1  | 1 | Log-transformed SEV scalar: Mouth C |
| Liver cancer               | Male   | 5-9 years   | 95+ years | 0  | 3 | LDI (I\$ per capita)                |
| Liver cancer               | Female | 5-9 years   | 95+ years | 0  | 3 | LDI (I\$ per capita)                |
| Liver cancer               | Male   | 5-9 years   | 95+ years | 0  | 3 | Socio-demographic Index             |
| Liver cancer               | Female | 5-9 years   | 95+ years | 0  | 3 | Socio-demographic Index             |
| Liver cancer               | Male   | 5-9 years   | 95+ years | -1 | 2 | Healthcare access and quality index |
| Liver cancer               | Female | 5-9 years   | 95+ years | -1 | 2 | Healthcare access and quality index |
| Liver cancer               | Male   | 5-9 years   | 95+ years | -1 | 3 | Education (years per capita)        |
| Liver cancer               | Female | 5-9 years   | 95+ years | -1 | 3 | Education (years per capita)        |
| Liver cancer               | Male   | 5-9 years   | 95+ years | 1  | 2 | Mean BMI                            |
| Liver cancer               | Female | 5-9 years   | 95+ years | 1  | 2 | Mean BMI                            |
| Liver cancer               | Male   | 5-9 years   | 95+ years | 1  | 1 | Alcohol (liters per capita)         |
| Liver cancer               | Female | 5-9 years   | 95+ years | 1  | 1 | Alcohol (liters per capita)         |

|              |        |           |           |    |   |                                                           |
|--------------|--------|-----------|-----------|----|---|-----------------------------------------------------------|
| Liver cancer | Male   | 5-9 years | 95+ years | 1  | 1 | Hepatitis B (HBsAg) Seroprevalence                        |
| Liver cancer | Female | 5-9 years | 95+ years | 1  | 1 | Hepatitis B (HBsAg) Seroprevalence                        |
| Liver cancer | Male   | 5-9 years | 95+ years | 1  | 1 | Hepatitis C (IgG) Seroprevalence                          |
| Liver cancer | Female | 5-9 years | 95+ years | 1  | 1 | Hepatitis C (IgG) Seroprevalence                          |
| Liver cancer | Male   | 5-9 years | 95+ years | -1 | 2 | Hepatitis B 3-dose coverage (proportion)                  |
| Liver cancer | Female | 5-9 years | 95+ years | -1 | 2 | Hepatitis B 3-dose coverage (proportion)                  |
| Liver cancer | Male   | 5-9 years | 95+ years | -1 | 2 | Hepatitis B 3-dose coverage (proportion), lagged 5 years  |
| Liver cancer | Female | 5-9 years | 95+ years | -1 | 2 | Hepatitis B 3-dose coverage (proportion), lagged 5 years  |
| Liver cancer | Male   | 5-9 years | 95+ years | -1 | 2 | Hepatitis B 3-dose coverage (proportion), lagged 10 years |
| Liver cancer | Female | 5-9 years | 95+ years | -1 | 2 | Hepatitis B 3-dose coverage (proportion), lagged 10 years |
| Liver cancer | Male   | 5-9 years | 95+ years | 1  | 2 | Tobacco (cigarettes per capita)                           |
| Liver cancer | Female | 5-9 years | 95+ years | 1  | 2 | Tobacco (cigarettes per capita)                           |
| Liver cancer | Male   | 5-9 years | 95+ years | 1  | 2 | Cumulative Cigarettes (10 Years)                          |
| Liver cancer | Female | 5-9 years | 95+ years | 1  | 2 | Cumulative Cigarettes (10 Years)                          |
| Liver cancer | Male   | 5-9 years | 95+ years | 1  | 2 | Cumulative Cigarettes (15 Years)                          |
| Liver cancer | Female | 5-9 years | 95+ years | 1  | 2 | Cumulative Cigarettes (15 Years)                          |
| Liver cancer | Male   | 5-9 years | 95+ years | 1  | 2 | Cumulative Cigarettes (20 Years)                          |
| Liver cancer | Female | 5-9 years | 95+ years | 1  | 2 | Cumulative Cigarettes (20 Years)                          |
| Liver cancer | Male   | 5-9 years | 95+ years | 1  | 2 | Cumulative Cigarettes (5 Years)                           |
| Liver cancer | Female | 5-9 years | 95+ years | 1  | 2 | Cumulative Cigarettes (5 Years)                           |
| Liver cancer | Male   | 5-9 years | 95+ years | 1  | 2 | Diabetes Fasting Plasma Glucose (mmol/L)                  |
| Liver cancer | Female | 5-9 years | 95+ years | 1  | 2 | Diabetes Fasting Plasma Glucose (mmol/L)                  |
| Liver cancer | Male   | 5-9 years | 95+ years | 1  | 2 | Diabetes Age-Standardized Prevalence (proportion)         |

|                         |        |             |           |    |   |                                                   |
|-------------------------|--------|-------------|-----------|----|---|---------------------------------------------------|
| Liver cancer            | Female | 5-9 years   | 95+ years | 1  | 2 | Diabetes Age-Standardized Prevalence (proportion) |
| Liver cancer            | Male   | 5-9 years   | 95+ years | 1  | 1 | Log-transformed SEV scalar: Liver C               |
| Liver cancer            | Female | 5-9 years   | 95+ years | 1  | 1 | Log-transformed SEV scalar: Liver C               |
| Liver cancer            | Male   | 5-9 years   | 95+ years | 1  | 2 | red meats adjusted (g)                            |
| Liver cancer            | Female | 5-9 years   | 95+ years | 1  | 2 | red meats adjusted (g)                            |
| Liver cancer            | Male   | 5-9 years   | 95+ years | 1  | 1 | HIV age-standardized prevalence                   |
| Liver cancer            | Female | 5-9 years   | 95+ years | 1  | 1 | HIV age-standardized prevalence                   |
| Malignant skin melanoma | Female | 15-19 years | 95+ years | 0  | 3 | LDI (I\$ per capita)                              |
| Malignant skin melanoma | Male   | 15-19 years | 95+ years | 0  | 3 | LDI (I\$ per capita)                              |
| Malignant skin melanoma | Female | 15-19 years | 95+ years | 0  | 3 | Socio-demographic Index                           |
| Malignant skin melanoma | Male   | 15-19 years | 95+ years | 0  | 3 | Socio-demographic Index                           |
| Malignant skin melanoma | Female | 15-19 years | 95+ years | -1 | 2 | Healthcare access and quality index               |
| Malignant skin melanoma | Male   | 15-19 years | 95+ years | -1 | 2 | Healthcare access and quality index               |
| Malignant skin melanoma | Female | 15-19 years | 95+ years | -1 | 3 | Education (years per capita)                      |
| Malignant skin melanoma | Male   | 15-19 years | 95+ years | -1 | 3 | Education (years per capita)                      |
| Malignant skin melanoma | Female | 15-19 years | 95+ years | 1  | 1 | Alcohol (liters per capita)                       |
| Malignant skin melanoma | Male   | 15-19 years | 95+ years | 1  | 2 | Alcohol (liters per capita)                       |
| Malignant skin melanoma | Male   | 15-19 years | 95+ years | 1  | 1 | Alcohol (liters per capita)                       |
| Malignant skin melanoma | Female | 15-19 years | 95+ years | 0  | 2 | Latitude Under 15 (proportion)                    |
| Malignant skin melanoma | Male   | 15-19 years | 95+ years | 0  | 2 | Latitude Under 15 (proportion)                    |
| Malignant skin melanoma | Female | 15-19 years | 95+ years | 0  | 2 | Latitude 15 to 30 (proportion)                    |
| Malignant skin melanoma | Male   | 15-19 years | 95+ years | 0  | 2 | Latitude 15 to 30 (proportion)                    |
| Malignant skin melanoma | Female | 15-19 years | 95+ years | -1 | 2 | Latitude 30 to 45 (proportion)                    |
| Malignant skin melanoma | Male   | 15-19 years | 95+ years | -1 | 2 | Latitude 30 to 45 (proportion)                    |
| Malignant skin melanoma | Female | 15-19 years | 95+ years | -1 | 2 | Latitude Over 45 (proportion)                     |
| Malignant skin melanoma | Male   | 15-19 years | 95+ years | -1 | 2 | Latitude Over 45 (proportion)                     |
| Malignant skin melanoma | Female | 15-19 years | 95+ years | -1 | 2 | fruits adjusted (g)                               |
| Malignant skin melanoma | Male   | 15-19 years | 95+ years | -1 | 2 | fruits adjusted (g)                               |
| Malignant skin melanoma | Female | 15-19 years | 95+ years | -1 | 2 | vegetables adjusted (g)                           |
| Malignant skin melanoma | Male   | 15-19 years | 95+ years | -1 | 2 | vegetables adjusted (g)                           |
| Mesothelioma            | Female | 15-19 years | 95+ years | 0  | 3 | LDI (I\$ per capita)                              |
| Mesothelioma            | Male   | 15-19 years | 95+ years | 0  | 3 | LDI (I\$ per capita)                              |

|                  |        |             |           |    |   |                                                        |
|------------------|--------|-------------|-----------|----|---|--------------------------------------------------------|
| Mesothelioma     | Female | 15-19 years | 95+ years | 0  | 3 | Socio-demographic Index                                |
| Mesothelioma     | Male   | 15-19 years | 95+ years | 0  | 3 | Socio-demographic Index                                |
| Mesothelioma     | Female | 15-19 years | 95+ years | -1 | 2 | Healthcare access and quality index                    |
| Mesothelioma     | Male   | 15-19 years | 95+ years | -1 | 2 | Healthcare access and quality index                    |
| Mesothelioma     | Female | 15-19 years | 95+ years | -1 | 3 | Education (years per capita)                           |
| Mesothelioma     | Male   | 15-19 years | 95+ years | -1 | 3 | Education (years per capita)                           |
| Mesothelioma     | Female | 15-19 years | 95+ years | 1  | 2 | Population Density (over 1000 ppl/sqkm, proportion)    |
| Mesothelioma     | Male   | 15-19 years | 95+ years | 1  | 2 | Population Density (over 1000 ppl/sqkm, proportion)    |
| Mesothelioma     | Female | 15-19 years | 95+ years | 1  | 1 | Indoor Air Pollution (All Cooking Fuels)               |
| Mesothelioma     | Male   | 15-19 years | 95+ years | 1  | 1 | Indoor Air Pollution (All Cooking Fuels)               |
| Mesothelioma     | Female | 15-19 years | 95+ years | 1  | 1 | Smoking Prevalence                                     |
| Mesothelioma     | Male   | 15-19 years | 95+ years | 1  | 1 | Smoking Prevalence                                     |
| Mesothelioma     | Female | 15-19 years | 95+ years | 1  | 1 | Cumulative Cigarettes (5 Years)                        |
| Mesothelioma     | Male   | 15-19 years | 95+ years | 1  | 1 | Cumulative Cigarettes (5 Years)                        |
| Mesothelioma     | Female | 15-19 years | 95+ years | 1  | 1 | Asbestos consumption (metric tons per year per capita) |
| Mesothelioma     | Male   | 15-19 years | 95+ years | 1  | 1 | Asbestos consumption (metric tons per year per capita) |
| Mesothelioma     | Female | 15-19 years | 95+ years | 1  | 1 | Asbestos production (binary)                           |
| Mesothelioma     | Male   | 15-19 years | 95+ years | 1  | 1 | Asbestos production (binary)                           |
| Mesothelioma     | Female | 15-19 years | 95+ years | 1  | 2 | Asbestos production (kg) per capita                    |
| Mesothelioma     | Male   | 15-19 years | 95+ years | 1  | 2 | Asbestos production (kg) per capita                    |
| Mesothelioma     | Female | 15-19 years | 95+ years | 1  | 2 | Gold production (binary)                               |
| Mesothelioma     | Male   | 15-19 years | 95+ years | 1  | 2 | Gold production (binary)                               |
| Mesothelioma     | Female | 15-19 years | 95+ years | 1  | 2 | Gold production (kg) per capita                        |
| Mesothelioma     | Male   | 15-19 years | 95+ years | 1  | 2 | Gold production (kg) per capita                        |
| Multiple myeloma | Male   | 15-19 years | 95+ years | 0  | 3 | LDI (I\$ per capita)                                   |
| Multiple myeloma | Female | 15-19 years | 95+ years | 0  | 3 | LDI (I\$ per capita)                                   |
| Multiple myeloma | Male   | 15-19 years | 95+ years | -1 | 2 | Sanitation (proportion with access)                    |
| Multiple myeloma | Female | 15-19 years | 95+ years | -1 | 2 | Sanitation (proportion with access)                    |

|                                                                        |        |             |           |    |   |                                                |
|------------------------------------------------------------------------|--------|-------------|-----------|----|---|------------------------------------------------|
| Multiple myeloma                                                       | Male   | 15-19 years | 95+ years | -1 | 2 | Improved Water Source (proportion with access) |
| Multiple myeloma                                                       | Female | 15-19 years | 95+ years | -1 | 2 | Improved Water Source (proportion with access) |
| Multiple myeloma                                                       | Male   | 15-19 years | 95+ years | 0  | 3 | Socio-demographic Index                        |
| Multiple myeloma                                                       | Female | 15-19 years | 95+ years | 0  | 3 | Socio-demographic Index                        |
| Multiple myeloma                                                       | Male   | 15-19 years | 95+ years | -1 | 2 | Healthcare access and quality index            |
| Multiple myeloma                                                       | Female | 15-19 years | 95+ years | -1 | 2 | Healthcare access and quality index            |
| Multiple myeloma                                                       | Male   | 15-19 years | 95+ years | -1 | 3 | Education (years per capita)                   |
| Multiple myeloma                                                       | Female | 15-19 years | 95+ years | -1 | 3 | Education (years per capita)                   |
| Multiple myeloma                                                       | Male   | 15-19 years | 95+ years | 1  | 2 | Mean BMI                                       |
| Multiple myeloma                                                       | Female | 15-19 years | 95+ years | 1  | 2 | Mean BMI                                       |
| Multiple myeloma                                                       | Male   | 15-19 years | 95+ years | 1  | 1 | Alcohol (liters per capita)                    |
| Multiple myeloma                                                       | Female | 15-19 years | 95+ years | 1  | 1 | Alcohol (liters per capita)                    |
| Multiple myeloma                                                       | Male   | 15-19 years | 95+ years | 1  | 1 | Smoking Prevalence                             |
| Multiple myeloma                                                       | Female | 15-19 years | 95+ years | 1  | 1 | Smoking Prevalence                             |
| Multiple myeloma                                                       | Male   | 15-19 years | 95+ years | 1  | 1 | Tobacco (cigarettes per capita)                |
| Multiple myeloma                                                       | Female | 15-19 years | 95+ years | 1  | 1 | Tobacco (cigarettes per capita)                |
| Multiple myeloma                                                       | Male   | 15-19 years | 95+ years | -1 | 2 | fruits adjusted (g)                            |
| Multiple myeloma                                                       | Female | 15-19 years | 95+ years | -1 | 2 | fruits adjusted (g)                            |
| Multiple myeloma                                                       | Male   | 15-19 years | 95+ years | -1 | 2 | vegetables adjusted (g)                        |
| Multiple myeloma                                                       | Female | 15-19 years | 95+ years | -1 | 2 | vegetables adjusted (g)                        |
| Multiple myeloma                                                       | Male   | 15-19 years | 95+ years | 1  | 2 | red meats adjusted (g)                         |
| Multiple myeloma                                                       | Female | 15-19 years | 95+ years | 1  | 2 | red meats adjusted (g)                         |
| Myelodysplastic, myeloproliferative, and other hematopoietic neoplasms | Male   | 0-6 days    | 95+ years | 0  | 3 | LDI (I\$ per capita)                           |
| Myelodysplastic, myeloproliferative, and other hematopoietic neoplasms | Female | 0-6 days    | 95+ years | 0  | 3 | LDI (I\$ per capita)                           |
| Myelodysplastic, myeloproliferative, and other hematopoietic neoplasms | Male   | 0-6 days    | 95+ years | 0  | 3 | Socio-demographic Index                        |
| Myelodysplastic, myeloproliferative, and other hematopoietic neoplasms | Female | 0-6 days    | 95+ years | 0  | 3 | Socio-demographic Index                        |



|                                                                        |        |          |           |    |   |                                     |
|------------------------------------------------------------------------|--------|----------|-----------|----|---|-------------------------------------|
| Myelodysplastic, myeloproliferative, and other hematopoietic neoplasms | Male   | 0-6 days | 95+ years | -1 | 2 | Healthcare access and quality index |
| Myelodysplastic, myeloproliferative, and other hematopoietic neoplasms | Female | 0-6 days | 95+ years | -1 | 2 | Healthcare access and quality index |
| Myelodysplastic, myeloproliferative, and other hematopoietic neoplasms | Male   | 0-6 days | 95+ years | -1 | 3 | Education (years per capita)        |
| Myelodysplastic, myeloproliferative, and other hematopoietic neoplasms | Female | 0-6 days | 95+ years | -1 | 3 | Education (years per capita)        |
| Myelodysplastic, myeloproliferative, and other hematopoietic neoplasms | Male   | 0-6 days | 95+ years | 1  | 2 | Alcohol (liters per capita)         |
| Myelodysplastic, myeloproliferative, and other hematopoietic neoplasms | Female | 0-6 days | 95+ years | 1  | 2 | Alcohol (liters per capita)         |
| Myelodysplastic, myeloproliferative, and other hematopoietic neoplasms | Male   | 0-6 days | 95+ years | 1  | 2 | Smoking Prevalence                  |
| Myelodysplastic, myeloproliferative, and other hematopoietic neoplasms | Female | 0-6 days | 95+ years | 1  | 2 | Smoking Prevalence                  |
| Myelodysplastic, myeloproliferative, and other hematopoietic neoplasms | Male   | 0-6 days | 95+ years | 1  | 2 | Tobacco (cigarettes per capita)     |
| Myelodysplastic, myeloproliferative, and other hematopoietic neoplasms | Female | 0-6 days | 95+ years | 1  | 2 | Tobacco (cigarettes per capita)     |
| Myelodysplastic, myeloproliferative, and other hematopoietic neoplasms | Male   | 0-6 days | 95+ years | 1  | 2 | Cumulative Cigarettes (10 Years)    |
| Myelodysplastic, myeloproliferative, and other hematopoietic neoplasms | Female | 0-6 days | 95+ years | 1  | 2 | Cumulative Cigarettes (10 Years)    |
| Myelodysplastic, myeloproliferative, and other hematopoietic neoplasms | Male   | 0-6 days | 95+ years | 1  | 2 | Cumulative Cigarettes (15 Years)    |
| Myelodysplastic, myeloproliferative, and other hematopoietic neoplasms | Female | 0-6 days | 95+ years | 1  | 2 | Cumulative Cigarettes (15 Years)    |
| Myelodysplastic, myeloproliferative, and other hematopoietic neoplasms | Male   | 0-6 days | 95+ years | 1  | 2 | Cumulative Cigarettes (20 Years)    |
| Myelodysplastic, myeloproliferative, and other hematopoietic neoplasms | Female | 0-6 days | 95+ years | 1  | 2 | Cumulative Cigarettes (20 Years)    |
| Myelodysplastic, myeloproliferative, and other hematopoietic neoplasms | Male   | 0-6 days | 95+ years | 1  | 2 | Cumulative Cigarettes (5 Years)     |

|                                                                        |        |           |           |    |   |                                                       |
|------------------------------------------------------------------------|--------|-----------|-----------|----|---|-------------------------------------------------------|
| Myelodysplastic, myeloproliferative, and other hematopoietic neoplasms | Female | 0-6 days  | 95+ years | 1  | 2 | Cumulative Cigarettes (5 Years)                       |
| Myelodysplastic, myeloproliferative, and other hematopoietic neoplasms | Male   | 0-6 days  | 95+ years | 1  | 1 | Log-transformed SEV scalar: Leukemia                  |
| Myelodysplastic, myeloproliferative, and other hematopoietic neoplasms | Female | 0-6 days  | 95+ years | 1  | 1 | Log-transformed SEV scalar: Leukemia                  |
| Myelodysplastic, myeloproliferative, and other hematopoietic neoplasms | Male   | 0-6 days  | 95+ years | 1  | 1 | Log-transformed age-standardized SEV scalar: Leukemia |
| Myelodysplastic, myeloproliferative, and other hematopoietic neoplasms | Female | 0-6 days  | 95+ years | 1  | 1 | Log-transformed age-standardized SEV scalar: Leukemia |
| Nasopharynx cancer                                                     | Male   | 5-9 years | 95+ years | 0  | 3 | LDI (I\$ per capita)                                  |
| Nasopharynx cancer                                                     | Female | 5-9 years | 95+ years | 0  | 3 | LDI (I\$ per capita)                                  |
| Nasopharynx cancer                                                     | Male   | 5-9 years | 95+ years | 0  | 3 | Socio-demographic Index                               |
| Nasopharynx cancer                                                     | Female | 5-9 years | 95+ years | 0  | 3 | Socio-demographic Index                               |
| Nasopharynx cancer                                                     | Male   | 5-9 years | 95+ years | -1 | 2 | Healthcare access and quality index                   |
| Nasopharynx cancer                                                     | Female | 5-9 years | 95+ years | -1 | 2 | Healthcare access and quality index                   |
| Nasopharynx cancer                                                     | Male   | 5-9 years | 95+ years | -1 | 3 | Education (years per capita)                          |
| Nasopharynx cancer                                                     | Female | 5-9 years | 95+ years | -1 | 3 | Education (years per capita)                          |
| Nasopharynx cancer                                                     | Male   | 5-9 years | 95+ years | 1  | 2 | Population Density (over 1000 ppl/sqkm, proportion)   |
| Nasopharynx cancer                                                     | Female | 5-9 years | 95+ years | 1  | 2 | Population Density (over 1000 ppl/sqkm, proportion)   |
| Nasopharynx cancer                                                     | Male   | 5-9 years | 95+ years | 1  | 1 | Alcohol (liters per capita)                           |
| Nasopharynx cancer                                                     | Female | 5-9 years | 95+ years | 1  | 1 | Alcohol (liters per capita)                           |
| Nasopharynx cancer                                                     | Male   | 5-9 years | 95+ years | 1  | 1 | Smoking Prevalence                                    |
| Nasopharynx cancer                                                     | Female | 5-9 years | 95+ years | 1  | 1 | Smoking Prevalence                                    |
| Nasopharynx cancer                                                     | Male   | 5-9 years | 95+ years | 1  | 2 | Population Density (under 150 ppl/sqkm, proportion)   |
| Nasopharynx cancer                                                     | Female | 5-9 years | 95+ years | 1  | 2 | Population Density (under 150 ppl/sqkm, proportion)   |
| Nasopharynx cancer                                                     | Male   | 5-9 years | 95+ years | 1  | 1 | Tobacco (cigarettes per capita)                       |
| Nasopharynx cancer                                                     | Female | 5-9 years | 95+ years | 1  | 1 | Tobacco (cigarettes per capita)                       |
| Nasopharynx cancer                                                     | Male   | 5-9 years | 95+ years | -1 | 2 | fruits adjusted (g)                                   |

|                          |        |             |           |    |   |                                      |
|--------------------------|--------|-------------|-----------|----|---|--------------------------------------|
| Nasopharynx cancer       | Female | 5-9 years   | 95+ years | -1 | 2 | fruits adjusted (g)                  |
| Nasopharynx cancer       | Male   | 5-9 years   | 95+ years | -1 | 2 | vegetables adjusted (g)              |
| Nasopharynx cancer       | Female | 5-9 years   | 95+ years | -1 | 2 | vegetables adjusted (g)              |
| Nasopharynx cancer       | Male   | 5-9 years   | 95+ years | 1  | 1 | Cumulative Cigarettes (10 Years)     |
| Nasopharynx cancer       | Female | 5-9 years   | 95+ years | 1  | 1 | Cumulative Cigarettes (10 Years)     |
| Nasopharynx cancer       | Male   | 5-9 years   | 95+ years | 1  | 1 | Cumulative Cigarettes (15 Years)     |
| Nasopharynx cancer       | Female | 5-9 years   | 95+ years | 1  | 1 | Cumulative Cigarettes (15 Years)     |
| Nasopharynx cancer       | Male   | 5-9 years   | 95+ years | 1  | 1 | Cumulative Cigarettes (20 Years)     |
| Nasopharynx cancer       | Female | 5-9 years   | 95+ years | 1  | 1 | Cumulative Cigarettes (20 Years)     |
| Nasopharynx cancer       | Male   | 5-9 years   | 95+ years | 1  | 1 | Cumulative Cigarettes (5 Years)      |
| Nasopharynx cancer       | Female | 5-9 years   | 95+ years | 1  | 1 | Cumulative Cigarettes (5 Years)      |
| Nasopharynx cancer       | Male   | 5-9 years   | 95+ years | 1  | 1 | Log-transformed SEV scalar: Nasoph C |
| Nasopharynx cancer       | Female | 5-9 years   | 95+ years | 1  | 1 | Log-transformed SEV scalar: Nasoph C |
| Non-Hodgkin lymphoma     | Male   | 0-6 days    | 95+ years | 0  | 3 | LDI (I\$ per capita)                 |
| Non-Hodgkin lymphoma     | Female | 0-6 days    | 95+ years | 0  | 3 | LDI (I\$ per capita)                 |
| Non-Hodgkin lymphoma     | Male   | 0-6 days    | 95+ years | 0  | 3 | Socio-demographic Index              |
| Non-Hodgkin lymphoma     | Female | 0-6 days    | 95+ years | 0  | 3 | Socio-demographic Index              |
| Non-Hodgkin lymphoma     | Male   | 0-6 days    | 95+ years | -1 | 2 | Healthcare access and quality index  |
| Non-Hodgkin lymphoma     | Female | 0-6 days    | 95+ years | -1 | 2 | Healthcare access and quality index  |
| Non-Hodgkin lymphoma     | Male   | 0-6 days    | 95+ years | 1  | 2 | Alcohol (liters per capita)          |
| Non-Hodgkin lymphoma     | Female | 0-6 days    | 95+ years | 1  | 2 | Alcohol (liters per capita)          |
| Non-Hodgkin lymphoma     | Male   | 0-6 days    | 95+ years | 1  | 2 | Smoking Prevalence                   |
| Non-Hodgkin lymphoma     | Female | 0-6 days    | 95+ years | 1  | 2 | Smoking Prevalence                   |
| Non-Hodgkin lymphoma     | Female | 0-6 days    | 95+ years | 0  | 3 | Total Fertility Rate                 |
| Non-Hodgkin lymphoma     | Male   | 0-6 days    | 95+ years | 1  | 2 | Cumulative Cigarettes (10 Years)     |
| Non-Hodgkin lymphoma     | Female | 0-6 days    | 95+ years | 1  | 2 | Cumulative Cigarettes (10 Years)     |
| Non-Hodgkin lymphoma     | Male   | 0-6 days    | 95+ years | 1  | 2 | Cumulative Cigarettes (15 Years)     |
| Non-Hodgkin lymphoma     | Female | 0-6 days    | 95+ years | 1  | 2 | Cumulative Cigarettes (15 Years)     |
| Non-Hodgkin lymphoma     | Male   | 0-6 days    | 95+ years | 1  | 2 | Cumulative Cigarettes (20 Years)     |
| Non-Hodgkin lymphoma     | Female | 0-6 days    | 95+ years | 1  | 2 | Cumulative Cigarettes (20 Years)     |
| Non-Hodgkin lymphoma     | Male   | 0-6 days    | 95+ years | 1  | 2 | Cumulative Cigarettes (5 Years)      |
| Non-Hodgkin lymphoma     | Female | 0-6 days    | 95+ years | 1  | 2 | Cumulative Cigarettes (5 Years)      |
| Non-melanoma skin cancer | Male   | 15-19 years | 95+ years | 0  | 3 | LDI (I\$ per capita)                 |

|                                                       |        |             |           |    |   |                                     |
|-------------------------------------------------------|--------|-------------|-----------|----|---|-------------------------------------|
| Non-melanoma skin cancer                              | Female | 15-19 years | 95+ years | 0  | 3 | LDI (I\$ per capita)                |
| Non-melanoma skin cancer                              | Male   | 15-19 years | 95+ years | 0  | 3 | Socio-demographic Index             |
| Non-melanoma skin cancer                              | Female | 15-19 years | 95+ years | 0  | 3 | Socio-demographic Index             |
| Non-melanoma skin cancer                              | Male   | 15-19 years | 95+ years | -1 | 2 | Healthcare access and quality index |
| Non-melanoma skin cancer                              | Female | 15-19 years | 95+ years | -1 | 2 | Healthcare access and quality index |
| Non-melanoma skin cancer                              | Male   | 15-19 years | 95+ years | -1 | 3 | Education (years per capita)        |
| Non-melanoma skin cancer                              | Female | 15-19 years | 95+ years | -1 | 3 | Education (years per capita)        |
| Non-melanoma skin cancer                              | Male   | 15-19 years | 95+ years | 1  | 1 | Smoking Prevalence                  |
| Non-melanoma skin cancer                              | Female | 15-19 years | 95+ years | 1  | 1 | Smoking Prevalence                  |
| Non-melanoma skin cancer                              | Male   | 15-19 years | 95+ years | 1  | 1 | Cumulative Cigarettes (10 Years)    |
| Non-melanoma skin cancer                              | Female | 15-19 years | 95+ years | 1  | 1 | Cumulative Cigarettes (10 Years)    |
| Non-melanoma skin cancer                              | Male   | 15-19 years | 95+ years | 1  | 1 | Cumulative Cigarettes (15 Years)    |
| Non-melanoma skin cancer                              | Female | 15-19 years | 95+ years | 1  | 1 | Cumulative Cigarettes (15 Years)    |
| Non-melanoma skin cancer                              | Male   | 15-19 years | 95+ years | 1  | 1 | Cumulative Cigarettes (5 Years)     |
| Non-melanoma skin cancer                              | Female | 15-19 years | 95+ years | 1  | 1 | Cumulative Cigarettes (5 Years)     |
| Non-melanoma skin cancer                              | Male   | 15-19 years | 95+ years | 0  | 2 | Average latitude                    |
| Non-melanoma skin cancer                              | Female | 15-19 years | 95+ years | 0  | 2 | Average latitude                    |
| Non-melanoma skin cancer<br>(squamous-cell carcinoma) | Male   | 28-364 days | 95+ years | 0  | 3 | LDI (I\$ per capita)                |
| Non-melanoma skin cancer<br>(squamous-cell carcinoma) | Female | 28-364 days | 95+ years | 0  | 3 | LDI (I\$ per capita)                |
| Non-melanoma skin cancer<br>(squamous-cell carcinoma) | Male   | 28-364 days | 95+ years | 0  | 3 | Socio-demographic Index             |
| Non-melanoma skin cancer<br>(squamous-cell carcinoma) | Female | 28-364 days | 95+ years | 0  | 3 | Socio-demographic Index             |
| Non-melanoma skin cancer<br>(squamous-cell carcinoma) | Male   | 28-364 days | 95+ years | -1 | 2 | Healthcare access and quality index |
| Non-melanoma skin cancer<br>(squamous-cell carcinoma) | Female | 28-364 days | 95+ years | -1 | 2 | Healthcare access and quality index |
| Non-melanoma skin cancer<br>(squamous-cell carcinoma) | Male   | 28-364 days | 95+ years | -1 | 3 | Education (years per capita)        |
| Non-melanoma skin cancer<br>(squamous-cell carcinoma) | Female | 28-364 days | 95+ years | -1 | 3 | Education (years per capita)        |

|                                                    |        |             |           |    |   |                                     |
|----------------------------------------------------|--------|-------------|-----------|----|---|-------------------------------------|
| Non-melanoma skin cancer (squamous-cell carcinoma) | Male   | 28-364 days | 95+ years | 1  | 1 | Smoking Prevalence                  |
| Non-melanoma skin cancer (squamous-cell carcinoma) | Female | 28-364 days | 95+ years | 1  | 1 | Smoking Prevalence                  |
| Non-melanoma skin cancer (squamous-cell carcinoma) | Male   | 28-364 days | 95+ years | 1  | 1 | Cumulative Cigarettes (10 Years)    |
| Non-melanoma skin cancer (squamous-cell carcinoma) | Female | 28-364 days | 95+ years | 1  | 1 | Cumulative Cigarettes (10 Years)    |
| Non-melanoma skin cancer (squamous-cell carcinoma) | Male   | 28-364 days | 95+ years | 1  | 1 | Cumulative Cigarettes (15 Years)    |
| Non-melanoma skin cancer (squamous-cell carcinoma) | Female | 28-364 days | 95+ years | 1  | 1 | Cumulative Cigarettes (15 Years)    |
| Non-melanoma skin cancer (squamous-cell carcinoma) | Male   | 28-364 days | 95+ years | 1  | 1 | Cumulative Cigarettes (5 Years)     |
| Non-melanoma skin cancer (squamous-cell carcinoma) | Female | 28-364 days | 95+ years | 1  | 1 | Cumulative Cigarettes (5 Years)     |
| Non-melanoma skin cancer (squamous-cell carcinoma) | Male   | 28-364 days | 95+ years | 0  | 2 | Average latitude                    |
| Non-melanoma skin cancer (squamous-cell carcinoma) | Female | 28-364 days | 95+ years | 0  | 2 | Average latitude                    |
| Other leukemia                                     | Male   | 0-6 days    | 95+ years | 0  | 3 | LDI (I\$ per capita)                |
| Other leukemia                                     | Female | 0-6 days    | 95+ years | 0  | 3 | LDI (I\$ per capita)                |
| Other leukemia                                     | Male   | 0-6 days    | 95+ years | 0  | 3 | Socio-demographic Index             |
| Other leukemia                                     | Female | 0-6 days    | 95+ years | 0  | 3 | Socio-demographic Index             |
| Other leukemia                                     | Male   | 0-6 days    | 95+ years | -1 | 2 | Healthcare access and quality index |
| Other leukemia                                     | Female | 0-6 days    | 95+ years | -1 | 2 | Healthcare access and quality index |
| Other leukemia                                     | Male   | 0-6 days    | 95+ years | -1 | 3 | Education (years per capita)        |
| Other leukemia                                     | Female | 0-6 days    | 95+ years | -1 | 3 | Education (years per capita)        |
| Other leukemia                                     | Male   | 0-6 days    | 95+ years | 1  | 2 | Alcohol (liters per capita)         |
| Other leukemia                                     | Female | 0-6 days    | 95+ years | 1  | 2 | Alcohol (liters per capita)         |
| Other leukemia                                     | Male   | 0-6 days    | 95+ years | 1  | 2 | Smoking Prevalence                  |
| Other leukemia                                     | Female | 0-6 days    | 95+ years | 1  | 2 | Smoking Prevalence                  |
| Other leukemia                                     | Male   | 0-6 days    | 95+ years | 1  | 2 | Tobacco (cigarettes per capita)     |

|                           |        |          |           |    |   |                                                       |
|---------------------------|--------|----------|-----------|----|---|-------------------------------------------------------|
| Other leukemia            | Female | 0-6 days | 95+ years | 1  | 2 | Tobacco (cigarettes per capita)                       |
| Other leukemia            | Male   | 0-6 days | 95+ years | 1  | 2 | Cumulative Cigarettes (10 Years)                      |
| Other leukemia            | Female | 0-6 days | 95+ years | 1  | 2 | Cumulative Cigarettes (10 Years)                      |
| Other leukemia            | Male   | 0-6 days | 95+ years | 1  | 2 | Cumulative Cigarettes (15 Years)                      |
| Other leukemia            | Female | 0-6 days | 95+ years | 1  | 2 | Cumulative Cigarettes (15 Years)                      |
| Other leukemia            | Male   | 0-6 days | 95+ years | 1  | 2 | Cumulative Cigarettes (20 Years)                      |
| Other leukemia            | Female | 0-6 days | 95+ years | 1  | 2 | Cumulative Cigarettes (20 Years)                      |
| Other leukemia            | Male   | 0-6 days | 95+ years | 1  | 2 | Cumulative Cigarettes (5 Years)                       |
| Other leukemia            | Female | 0-6 days | 95+ years | 1  | 2 | Cumulative Cigarettes (5 Years)                       |
| Other leukemia            | Male   | 0-6 days | 95+ years | 1  | 1 | Log-transformed SEV scalar: Leukemia                  |
| Other leukemia            | Female | 0-6 days | 95+ years | 1  | 1 | Log-transformed SEV scalar: Leukemia                  |
| Other leukemia            | Male   | 0-6 days | 95+ years | 1  | 1 | Log-transformed age-standardized SEV scalar: Leukemia |
| Other leukemia            | Female | 0-6 days | 95+ years | 1  | 1 | Log-transformed age-standardized SEV scalar: Leukemia |
| Other malignant neoplasms | Male   | 0-6 days | 95+ years | 0  | 3 | LDI (I\$ per capita)                                  |
| Other malignant neoplasms | Female | 0-6 days | 95+ years | 0  | 3 | LDI (I\$ per capita)                                  |
| Other malignant neoplasms | Male   | 0-6 days | 95+ years | 0  | 3 | Socio-demographic Index                               |
| Other malignant neoplasms | Female | 0-6 days | 95+ years | 0  | 3 | Socio-demographic Index                               |
| Other malignant neoplasms | Male   | 0-6 days | 95+ years | -1 | 2 | Healthcare access and quality index                   |
| Other malignant neoplasms | Female | 0-6 days | 95+ years | -1 | 2 | Healthcare access and quality index                   |
| Other malignant neoplasms | Male   | 0-6 days | 95+ years | -1 | 3 | Education (years per capita)                          |
| Other malignant neoplasms | Female | 0-6 days | 95+ years | -1 | 3 | Education (years per capita)                          |
| Other malignant neoplasms | Male   | 0-6 days | 95+ years | 1  | 1 | Smoking Prevalence                                    |
| Other malignant neoplasms | Female | 0-6 days | 95+ years | 1  | 1 | Smoking Prevalence                                    |
| Other malignant neoplasms | Male   | 0-6 days | 95+ years | 1  | 1 | Tobacco (cigarettes per capita)                       |
| Other malignant neoplasms | Female | 0-6 days | 95+ years | 1  | 1 | Tobacco (cigarettes per capita)                       |
| Other malignant neoplasms | Male   | 0-6 days | 95+ years | -1 | 2 | fruits adjusted (g)                                   |
| Other malignant neoplasms | Female | 0-6 days | 95+ years | -1 | 2 | fruits adjusted (g)                                   |
| Other malignant neoplasms | Male   | 0-6 days | 95+ years | -1 | 2 | vegetables adjusted (g)                               |
| Other malignant neoplasms | Female | 0-6 days | 95+ years | -1 | 2 | vegetables adjusted (g)                               |
| Other malignant neoplasms | Male   | 0-6 days | 95+ years | -1 | 2 | nuts seeds adjusted (g)                               |
| Other malignant neoplasms | Female | 0-6 days | 95+ years | -1 | 2 | nuts seeds adjusted (g)                               |

|                           |        |             |           |    |   |                                                     |
|---------------------------|--------|-------------|-----------|----|---|-----------------------------------------------------|
| Other malignant neoplasms | Male   | 0-6 days    | 95+ years | -1 | 2 | pufa adjusted(percent)                              |
| Other malignant neoplasms | Female | 0-6 days    | 95+ years | -1 | 2 | pufa adjusted(percent)                              |
| Other pharynx cancer      | Male   | 15-19 years | 95+ years | 0  | 3 | LDI (I\$ per capita)                                |
| Other pharynx cancer      | Female | 15-19 years | 95+ years | 0  | 3 | LDI (I\$ per capita)                                |
| Other pharynx cancer      | Male   | 15-19 years | 95+ years | 0  | 3 | Socio-demographic Index                             |
| Other pharynx cancer      | Female | 15-19 years | 95+ years | 0  | 3 | Socio-demographic Index                             |
| Other pharynx cancer      | Male   | 15-19 years | 95+ years | -1 | 2 | Healthcare access and quality index                 |
| Other pharynx cancer      | Female | 15-19 years | 95+ years | -1 | 2 | Healthcare access and quality index                 |
| Other pharynx cancer      | Male   | 15-19 years | 95+ years | -1 | 3 | Education (years per capita)                        |
| Other pharynx cancer      | Female | 15-19 years | 95+ years | -1 | 3 | Education (years per capita)                        |
| Other pharynx cancer      | Male   | 15-19 years | 95+ years | 1  | 2 | Population Density (over 1000 ppl/sqkm, proportion) |
| Other pharynx cancer      | Female | 15-19 years | 95+ years | 1  | 2 | Population Density (over 1000 ppl/sqkm, proportion) |
| Other pharynx cancer      | Male   | 15-19 years | 95+ years | 1  | 1 | Alcohol (liters per capita)                         |
| Other pharynx cancer      | Female | 15-19 years | 95+ years | 1  | 1 | Alcohol (liters per capita)                         |
| Other pharynx cancer      | Male   | 15-19 years | 95+ years | 1  | 1 | Smoking Prevalence                                  |
| Other pharynx cancer      | Female | 15-19 years | 95+ years | 1  | 1 | Smoking Prevalence                                  |
| Other pharynx cancer      | Male   | 15-19 years | 95+ years | 1  | 2 | Population Density (under 150 ppl/sqkm, proportion) |
| Other pharynx cancer      | Female | 15-19 years | 95+ years | 1  | 2 | Population Density (under 150 ppl/sqkm, proportion) |
| Other pharynx cancer      | Male   | 15-19 years | 95+ years | -1 | 2 | fruits adjusted (g)                                 |
| Other pharynx cancer      | Female | 15-19 years | 95+ years | -1 | 2 | fruits adjusted (g)                                 |
| Other pharynx cancer      | Male   | 15-19 years | 95+ years | -1 | 2 | vegetables adjusted (g)                             |
| Other pharynx cancer      | Female | 15-19 years | 95+ years | -1 | 2 | vegetables adjusted (g)                             |
| Other pharynx cancer      | Male   | 15-19 years | 95+ years | 1  | 2 | Cumulative Cigarettes (5 Years)                     |
| Other pharynx cancer      | Female | 15-19 years | 95+ years | 1  | 2 | Cumulative Cigarettes (5 Years)                     |
| Other pharynx cancer      | Male   | 15-19 years | 95+ years | 1  | 1 | Log-transformed SEV scalar: Oth Phar C              |
| Other pharynx cancer      | Female | 15-19 years | 95+ years | 1  | 1 | Log-transformed SEV scalar: Oth Phar C              |
| Ovarian cancer            | Female | 15-19 years | 95+ years | 0  | 3 | LDI (I\$ per capita)                                |

|                   |        |             |           |    |   |                                                   |
|-------------------|--------|-------------|-----------|----|---|---------------------------------------------------|
| Ovarian cancer    | Female | 15-19 years | 95+ years | 0  | 3 | Socio-demographic Index                           |
| Ovarian cancer    | Female | 15-19 years | 95+ years | -1 | 2 | Healthcare access and quality index               |
| Ovarian cancer    | Female | 15-19 years | 95+ years | -1 | 3 | Education (years per capita)                      |
| Ovarian cancer    | Female | 15-19 years | 95+ years | 1  | 2 | Mean BMI                                          |
| Ovarian cancer    | Female | 15-19 years | 95+ years | 1  | 1 | Alcohol (liters per capita)                       |
| Ovarian cancer    | Female | 15-19 years | 95+ years | 1  | 2 | Smoking Prevalence                                |
| Ovarian cancer    | Female | 15-19 years | 95+ years | 0  | 2 | Total Fertility Rate                              |
| Ovarian cancer    | Female | 15-19 years | 95+ years | 1  | 2 | energy unadjusted(kcal)                           |
| Ovarian cancer    | Female | 15-19 years | 95+ years | 1  | 1 | Tobacco (cigarettes per capita)                   |
| Ovarian cancer    | Female | 15-19 years | 95+ years | -1 | 2 | fruits adjusted (g)                               |
| Ovarian cancer    | Female | 15-19 years | 95+ years | -1 | 2 | vegetables adjusted (g)                           |
| Ovarian cancer    | Female | 15-19 years | 95+ years | 1  | 1 | Cumulative Cigarettes (10 Years)                  |
| Ovarian cancer    | Female | 15-19 years | 95+ years | 1  | 1 | Cumulative Cigarettes (15 Years)                  |
| Ovarian cancer    | Female | 15-19 years | 95+ years | 1  | 1 | Cumulative Cigarettes (20 Years)                  |
| Ovarian cancer    | Female | 15-19 years | 95+ years | 1  | 1 | Cumulative Cigarettes (5 Years)                   |
| Ovarian cancer    | Female | 15-19 years | 95+ years | 1  | 2 | Diabetes Age-Standardized Prevalence (proportion) |
| Ovarian cancer    | Female | 15-19 years | 95+ years | -1 | 1 | Contraception (Modern) Prevalence (proportion)    |
| Ovarian cancer    | Female | 15-19 years | 95+ years | 1  | 1 | Log-transformed SEV scalar: Ovary C               |
| Pancreatic cancer | Male   | 15-19 years | 95+ years | 0  | 3 | LDI (I\$ per capita)                              |
| Pancreatic cancer | Female | 15-19 years | 95+ years | 0  | 3 | LDI (I\$ per capita)                              |
| Pancreatic cancer | Male   | 15-19 years | 95+ years | 0  | 3 | Socio-demographic Index                           |
| Pancreatic cancer | Female | 15-19 years | 95+ years | 0  | 3 | Socio-demographic Index                           |
| Pancreatic cancer | Male   | 15-19 years | 95+ years | -1 | 2 | Healthcare access and quality index               |
| Pancreatic cancer | Female | 15-19 years | 95+ years | -1 | 2 | Healthcare access and quality index               |
| Pancreatic cancer | Male   | 15-19 years | 95+ years | -1 | 3 | Education (years per capita)                      |
| Pancreatic cancer | Female | 15-19 years | 95+ years | -1 | 3 | Education (years per capita)                      |
| Pancreatic cancer | Male   | 15-19 years | 95+ years | 1  | 1 | Mean BMI                                          |
| Pancreatic cancer | Female | 15-19 years | 95+ years | 1  | 1 | Mean BMI                                          |
| Pancreatic cancer | Male   | 15-19 years | 95+ years | 1  | 1 | Alcohol (liters per capita)                       |
| Pancreatic cancer | Female | 15-19 years | 95+ years | 1  | 1 | Alcohol (liters per capita)                       |
| Pancreatic cancer | Male   | 15-19 years | 95+ years | 1  | 1 | Smoking Prevalence                                |



|                   |        |             |           |    |   |                                                   |
|-------------------|--------|-------------|-----------|----|---|---------------------------------------------------|
| Pancreatic cancer | Female | 15-19 years | 95+ years | 1  | 1 | Smoking Prevalence                                |
| Pancreatic cancer | Male   | 15-19 years | 95+ years | 1  | 2 | energy unadjusted(kcal)                           |
| Pancreatic cancer | Female | 15-19 years | 95+ years | 1  | 2 | energy unadjusted(kcal)                           |
| Pancreatic cancer | Male   | 15-19 years | 95+ years | 1  | 1 | Tobacco (cigarettes per capita)                   |
| Pancreatic cancer | Female | 15-19 years | 95+ years | 1  | 1 | Tobacco (cigarettes per capita)                   |
| Pancreatic cancer | Male   | 15-19 years | 95+ years | -1 | 2 | fruits adjusted (g)                               |
| Pancreatic cancer | Female | 15-19 years | 95+ years | -1 | 2 | fruits adjusted (g)                               |
| Pancreatic cancer | Male   | 15-19 years | 95+ years | -1 | 2 | vegetables adjusted (g)                           |
| Pancreatic cancer | Female | 15-19 years | 95+ years | -1 | 2 | vegetables adjusted (g)                           |
| Pancreatic cancer | Male   | 15-19 years | 95+ years | 1  | 1 | Cumulative Cigarettes (10 Years)                  |
| Pancreatic cancer | Female | 15-19 years | 95+ years | 1  | 1 | Cumulative Cigarettes (10 Years)                  |
| Pancreatic cancer | Male   | 15-19 years | 95+ years | 1  | 1 | Cumulative Cigarettes (15 Years)                  |
| Pancreatic cancer | Female | 15-19 years | 95+ years | 1  | 1 | Cumulative Cigarettes (15 Years)                  |
| Pancreatic cancer | Male   | 15-19 years | 95+ years | 1  | 1 | Cumulative Cigarettes (20 Years)                  |
| Pancreatic cancer | Female | 15-19 years | 95+ years | 1  | 1 | Cumulative Cigarettes (20 Years)                  |
| Pancreatic cancer | Male   | 15-19 years | 95+ years | 1  | 1 | Cumulative Cigarettes (5 Years)                   |
| Pancreatic cancer | Female | 15-19 years | 95+ years | 1  | 1 | Cumulative Cigarettes (5 Years)                   |
| Pancreatic cancer | Male   | 15-19 years | 95+ years | 1  | 2 | Diabetes Age-Standardized Prevalence (proportion) |
| Pancreatic cancer | Female | 15-19 years | 95+ years | 1  | 2 | Diabetes Age-Standardized Prevalence (proportion) |
| Pancreatic cancer | Male   | 15-19 years | 95+ years | 1  | 2 | red meats adjusted (g)                            |
| Pancreatic cancer | Female | 15-19 years | 95+ years | 1  | 2 | red meats adjusted (g)                            |
| Pancreatic cancer | Male   | 15-19 years | 95+ years | 1  | 1 | Log-transformed SEV scalar: Pancreas C            |
| Pancreatic cancer | Female | 15-19 years | 95+ years | 1  | 1 | Log-transformed SEV scalar: Pancreas C            |
| Prostate cancer   | Male   | 15-19 years | 95+ years | 0  | 3 | LDI (I\$ per capita)                              |
| Prostate cancer   | Male   | 15-19 years | 95+ years | 0  | 3 | Socio-demographic Index                           |
| Prostate cancer   | Male   | 15-19 years | 95+ years | -1 | 2 | Healthcare access and quality index               |
| Prostate cancer   | Male   | 15-19 years | 95+ years | -1 | 3 | Education (years per capita)                      |
| Prostate cancer   | Male   | 15-19 years | 95+ years | 1  | 1 | Log-transformed SEV scalar: Prostate C            |
| Stomach cancer    | Female | 15-19 years | 95+ years | 0  | 3 | LDI (I\$ per capita)                              |

|                |        |             |           |    |   |                                                |
|----------------|--------|-------------|-----------|----|---|------------------------------------------------|
| Stomach cancer | Male   | 15-19 years | 95+ years | 0  | 3 | LDI (I\$ per capita)                           |
| Stomach cancer | Female | 15-19 years | 95+ years | -1 | 2 | Sanitation (proportion with access)            |
| Stomach cancer | Male   | 15-19 years | 95+ years | -1 | 2 | Sanitation (proportion with access)            |
| Stomach cancer | Female | 15-19 years | 95+ years | -1 | 2 | Improved Water Source (proportion with access) |
| Stomach cancer | Male   | 15-19 years | 95+ years | -1 | 2 | Improved Water Source (proportion with access) |
| Stomach cancer | Female | 15-19 years | 95+ years | 1  | 1 | SEV unsafe water                               |
| Stomach cancer | Male   | 15-19 years | 95+ years | 1  | 1 | SEV unsafe water                               |
| Stomach cancer | Female | 15-19 years | 95+ years | 1  | 1 | SEV unsafe sanitation                          |
| Stomach cancer | Male   | 15-19 years | 95+ years | 1  | 1 | SEV unsafe sanitation                          |
| Stomach cancer | Female | 15-19 years | 95+ years | 0  | 3 | Socio-demographic Index                        |
| Stomach cancer | Male   | 15-19 years | 95+ years | 0  | 3 | Socio-demographic Index                        |
| Stomach cancer | Female | 15-19 years | 95+ years | -1 | 2 | Healthcare access and quality index            |
| Stomach cancer | Male   | 15-19 years | 95+ years | -1 | 2 | Healthcare access and quality index            |
| Stomach cancer | Female | 15-19 years | 95+ years | -1 | 3 | Education (years per capita)                   |
| Stomach cancer | Male   | 15-19 years | 95+ years | -1 | 3 | Education (years per capita)                   |
| Stomach cancer | Female | 15-19 years | 95+ years | 1  | 2 | Mean BMI                                       |
| Stomach cancer | Male   | 15-19 years | 95+ years | 1  | 2 | Mean BMI                                       |
| Stomach cancer | Female | 15-19 years | 95+ years | 1  | 1 | Smoking Prevalence                             |
| Stomach cancer | Male   | 15-19 years | 95+ years | 1  | 1 | Smoking Prevalence                             |
| Stomach cancer | Female | 15-19 years | 95+ years | 1  | 1 | Tobacco (cigarettes per capita)                |
| Stomach cancer | Male   | 15-19 years | 95+ years | 1  | 1 | Tobacco (cigarettes per capita)                |
| Stomach cancer | Female | 15-19 years | 95+ years | -1 | 2 | fruits adjusted (g)                            |
| Stomach cancer | Male   | 15-19 years | 95+ years | -1 | 2 | fruits adjusted (g)                            |
| Stomach cancer | Female | 15-19 years | 95+ years | -1 | 2 | vegetables adjusted (g)                        |
| Stomach cancer | Male   | 15-19 years | 95+ years | -1 | 2 | vegetables adjusted (g)                        |
| Stomach cancer | Female | 15-19 years | 95+ years | 1  | 1 | Cumulative Cigarettes (10 Years)               |
| Stomach cancer | Male   | 15-19 years | 95+ years | 1  | 1 | Cumulative Cigarettes (10 Years)               |
| Stomach cancer | Female | 15-19 years | 95+ years | 1  | 1 | Cumulative Cigarettes (15 Years)               |
| Stomach cancer | Male   | 15-19 years | 95+ years | 1  | 1 | Cumulative Cigarettes (15 Years)               |
| Stomach cancer | Female | 15-19 years | 95+ years | 1  | 1 | Cumulative Cigarettes (20 Years)               |
| Stomach cancer | Male   | 15-19 years | 95+ years | 1  | 1 | Cumulative Cigarettes (20 Years)               |

|                   |        |             |           |    |   |                                                |
|-------------------|--------|-------------|-----------|----|---|------------------------------------------------|
| Stomach cancer    | Female | 15-19 years | 95+ years | 1  | 1 | Cumulative Cigarettes (5 Years)                |
| Stomach cancer    | Male   | 15-19 years | 95+ years | 1  | 1 | Cumulative Cigarettes (5 Years)                |
| Stomach cancer    | Female | 15-19 years | 95+ years | 1  | 1 | Log-transformed SEV scalar: Stomach C          |
| Stomach cancer    | Male   | 15-19 years | 95+ years | 1  | 1 | Log-transformed SEV scalar: Stomach C          |
| Stomach cancer    | Female | 15-19 years | 95+ years | 1  | 1 | Diet high in sodium                            |
| Stomach cancer    | Male   | 15-19 years | 95+ years | 1  | 1 | Diet high in sodium                            |
| Testicular cancer | Male   | 15-19 years | 95+ years | 0  | 3 | LDI (I\$ per capita)                           |
| Testicular cancer | Male   | 15-19 years | 95+ years | 0  | 3 | Socio-demographic Index                        |
| Testicular cancer | Male   | 15-19 years | 95+ years | -1 | 2 | Healthcare access and quality index            |
| Testicular cancer | Male   | 15-19 years | 95+ years | -1 | 3 | Education (years per capita)                   |
| Testicular cancer | Male   | 15-19 years | 95+ years | 1  | 2 | Smoking Prevalence                             |
| Testicular cancer | Male   | 15-19 years | 95+ years | 1  | 2 | Tobacco (cigarettes per capita)                |
| Testicular cancer | Male   | 15-19 years | 95+ years | -1 | 2 | fruits adjusted (g)                            |
| Testicular cancer | Male   | 15-19 years | 95+ years | -1 | 2 | vegetables adjusted (g)                        |
| Testicular cancer | Male   | 15-19 years | 95+ years | 1  | 2 | Cumulative Cigarettes (10 Years)               |
| Testicular cancer | Male   | 15-19 years | 95+ years | 1  | 2 | Cumulative Cigarettes (15 Years)               |
| Testicular cancer | Male   | 15-19 years | 95+ years | 1  | 2 | Cumulative Cigarettes (20 Years)               |
| Testicular cancer | Male   | 15-19 years | 95+ years | 1  | 2 | Cumulative Cigarettes (5 Years)                |
| Thyroid cancer    | Male   | 10-14 years | 95+ years | 0  | 3 | LDI (I\$ per capita)                           |
| Thyroid cancer    | Female | 10-14 years | 95+ years | 0  | 3 | LDI (I\$ per capita)                           |
| Thyroid cancer    | Male   | 10-14 years | 95+ years | -1 | 2 | Sanitation (proportion with access)            |
| Thyroid cancer    | Female | 10-14 years | 95+ years | -1 | 2 | Sanitation (proportion with access)            |
| Thyroid cancer    | Male   | 10-14 years | 95+ years | -1 | 2 | Improved Water Source (proportion with access) |
| Thyroid cancer    | Female | 10-14 years | 95+ years | -1 | 2 | Improved Water Source (proportion with access) |
| Thyroid cancer    | Male   | 10-14 years | 95+ years | 0  | 3 | Socio-demographic Index                        |
| Thyroid cancer    | Female | 10-14 years | 95+ years | 0  | 3 | Socio-demographic Index                        |
| Thyroid cancer    | Male   | 10-14 years | 95+ years | -1 | 2 | Healthcare access and quality index            |
| Thyroid cancer    | Female | 10-14 years | 95+ years | -1 | 2 | Healthcare access and quality index            |
| Thyroid cancer    | Male   | 10-14 years | 95+ years | -1 | 3 | Education (years per capita)                   |
| Thyroid cancer    | Female | 10-14 years | 95+ years | -1 | 3 | Education (years per capita)                   |
| Thyroid cancer    | Male   | 10-14 years | 95+ years | 1  | 2 | Mean BMI                                       |

|                                     |        |             |           |    |   |                                          |
|-------------------------------------|--------|-------------|-----------|----|---|------------------------------------------|
| Thyroid cancer                      | Female | 10-14 years | 95+ years | 1  | 2 | Mean BMI                                 |
| Thyroid cancer                      | Male   | 10-14 years | 95+ years | 1  | 1 | Alcohol (liters per capita)              |
| Thyroid cancer                      | Female | 10-14 years | 95+ years | 1  | 1 | Alcohol (liters per capita)              |
| Thyroid cancer                      | Male   | 10-14 years | 95+ years | 2  | 1 | Smoking Prevalence                       |
| Thyroid cancer                      | Female | 10-14 years | 95+ years | 1  | 2 | Smoking Prevalence                       |
| Thyroid cancer                      | Male   | 10-14 years | 95+ years | 1  | 2 | Smoking Prevalence                       |
| Thyroid cancer                      | Male   | 10-14 years | 95+ years | 1  | 2 | Tobacco (cigarettes per capita)          |
| Thyroid cancer                      | Female | 10-14 years | 95+ years | 1  | 2 | Tobacco (cigarettes per capita)          |
| Thyroid cancer                      | Male   | 10-14 years | 95+ years | -1 | 2 | fruits adjusted (g)                      |
| Thyroid cancer                      | Female | 10-14 years | 95+ years | -1 | 2 | fruits adjusted (g)                      |
| Thyroid cancer                      | Male   | 10-14 years | 95+ years | -1 | 2 | vegetables adjusted (g)                  |
| Thyroid cancer                      | Female | 10-14 years | 95+ years | -1 | 2 | vegetables adjusted (g)                  |
| Thyroid cancer                      | Male   | 10-14 years | 95+ years | 1  | 2 | red meats adjusted (g)                   |
| Thyroid cancer                      | Female | 10-14 years | 95+ years | 1  | 2 | red meats adjusted (g)                   |
| Thyroid cancer                      | Male   | 10-14 years | 95+ years | 1  | 1 | Log-transformed SEV scalar: Thyroid C    |
| Thyroid cancer                      | Female | 10-14 years | 95+ years | 1  | 1 | Log-transformed SEV scalar: Thyroid C    |
| Tracheal, bronchus, and lung cancer | Female | 15-19 years | 95+ years | 0  | 3 | LDI (I\$ per capita)                     |
| Tracheal, bronchus, and lung cancer | Male   | 15-19 years | 95+ years | 0  | 3 | LDI (I\$ per capita)                     |
| Tracheal, bronchus, and lung cancer | Female | 15-19 years | 95+ years | 0  | 3 | Socio-demographic Index                  |
| Tracheal, bronchus, and lung cancer | Male   | 15-19 years | 95+ years | 0  | 3 | Socio-demographic Index                  |
| Tracheal, bronchus, and lung cancer | Female | 15-19 years | 95+ years | -1 | 2 | Healthcare access and quality index      |
| Tracheal, bronchus, and lung cancer | Male   | 15-19 years | 95+ years | -1 | 2 | Healthcare access and quality index      |
| Tracheal, bronchus, and lung cancer | Female | 15-19 years | 95+ years | -1 | 3 | Education (years per capita)             |
| Tracheal, bronchus, and lung cancer | Male   | 15-19 years | 95+ years | -1 | 3 | Education (years per capita)             |
| Tracheal, bronchus, and lung cancer | Female | 15-19 years | 95+ years | 1  | 2 | Indoor Air Pollution (All Cooking Fuels) |
| Tracheal, bronchus, and lung cancer | Male   | 15-19 years | 95+ years | 1  | 2 | Indoor Air Pollution (All Cooking Fuels) |
| Tracheal, bronchus, and lung cancer | Female | 15-19 years | 95+ years | 1  | 2 | Outdoor Air Pollution (PM2.5)            |
| Tracheal, bronchus, and lung cancer | Male   | 15-19 years | 95+ years | 1  | 2 | Outdoor Air Pollution (PM2.5)            |
| Tracheal, bronchus, and lung cancer | Female | 15-19 years | 95+ years | 1  | 1 | Secondhand smoke                         |
| Tracheal, bronchus, and lung cancer | Male   | 15-19 years | 95+ years | 1  | 1 | Secondhand smoke                         |
| Tracheal, bronchus, and lung cancer | Female | 15-19 years | 95+ years | 1  | 1 | Smoking Prevalence                       |
| Tracheal, bronchus, and lung cancer | Male   | 15-19 years | 95+ years | 1  | 1 | Smoking Prevalence                       |
| Tracheal, bronchus, and lung cancer | Female | 15-19 years | 95+ years | 1  | 1 | Tobacco (cigarettes per capita)          |

|                                     |        |             |           |    |   |                                                        |
|-------------------------------------|--------|-------------|-----------|----|---|--------------------------------------------------------|
| Tracheal, bronchus, and lung cancer | Male   | 15-19 years | 95+ years | 1  | 1 | Tobacco (cigarettes per capita)                        |
| Tracheal, bronchus, and lung cancer | Female | 15-19 years | 95+ years | 1  | 1 | Cumulative Cigarettes (10 Years)                       |
| Tracheal, bronchus, and lung cancer | Male   | 15-19 years | 95+ years | 1  | 1 | Cumulative Cigarettes (10 Years)                       |
| Tracheal, bronchus, and lung cancer | Female | 15-19 years | 95+ years | 1  | 1 | Cumulative Cigarettes (15 Years)                       |
| Tracheal, bronchus, and lung cancer | Male   | 15-19 years | 95+ years | 1  | 1 | Cumulative Cigarettes (15 Years)                       |
| Tracheal, bronchus, and lung cancer | Female | 15-19 years | 95+ years | 1  | 1 | Cumulative Cigarettes (20 Years)                       |
| Tracheal, bronchus, and lung cancer | Male   | 15-19 years | 95+ years | 1  | 1 | Cumulative Cigarettes (20 Years)                       |
| Tracheal, bronchus, and lung cancer | Female | 15-19 years | 95+ years | 1  | 1 | Cumulative Cigarettes (5 Years)                        |
| Tracheal, bronchus, and lung cancer | Male   | 15-19 years | 95+ years | 1  | 1 | Cumulative Cigarettes (5 Years)                        |
| Tracheal, bronchus, and lung cancer | Female | 15-19 years | 95+ years | 1  | 1 | Log-transformed SEV scalar: Lung C                     |
| Tracheal, bronchus, and lung cancer | Male   | 15-19 years | 95+ years | 1  | 1 | Log-transformed SEV scalar: Lung C                     |
| Tracheal, bronchus, and lung cancer | Female | 15-19 years | 95+ years | 1  | 1 | Log-transformed age-standardized SEV scalar: Lung C    |
| Tracheal, bronchus, and lung cancer | Male   | 15-19 years | 95+ years | 1  | 1 | Log-transformed age-standardized SEV scalar: Lung C    |
| Tracheal, bronchus, and lung cancer | Female | 15-19 years | 95+ years | 1  | 1 | Asbestos consumption (metric tons per year per capita) |
| Tracheal, bronchus, and lung cancer | Male   | 15-19 years | 95+ years | 1  | 1 | Asbestos consumption (metric tons per year per capita) |
| Uterine cancer                      | Female | 15-19 years | 95+ years | 0  | 3 | LDI (I\$ per capita)                                   |
| Uterine cancer                      | Female | 15-19 years | 95+ years | 0  | 3 | Socio-demographic Index                                |
| Uterine cancer                      | Female | 15-19 years | 95+ years | -1 | 2 | Healthcare access and quality index                    |
| Uterine cancer                      | Female | 15-19 years | 95+ years | -1 | 3 | Education (years per capita)                           |
| Uterine cancer                      | Female | 15-19 years | 95+ years | 1  | 1 | Mean BMI                                               |
| Uterine cancer                      | Female | 15-19 years | 95+ years | 1  | 2 | Smoking Prevalence                                     |
| Uterine cancer                      | Female | 15-19 years | 95+ years | 0  | 2 | Total Fertility Rate                                   |
| Uterine cancer                      | Female | 15-19 years | 95+ years | 1  | 2 | Tobacco (cigarettes per capita)                        |
| Uterine cancer                      | Female | 15-19 years | 95+ years | -1 | 2 | fruits adjusted (g)                                    |
| Uterine cancer                      | Female | 15-19 years | 95+ years | -1 | 2 | vegetables adjusted (g)                                |
| Uterine cancer                      | Female | 15-19 years | 95+ years | 1  | 2 | Cumulative Cigarettes (10 Years)                       |
| Uterine cancer                      | Female | 15-19 years | 95+ years | 1  | 2 | Cumulative Cigarettes (5 Years)                        |
| Uterine cancer                      | Female | 15-19 years | 95+ years | 1  | 2 | Diabetes Age-Standardized Prevalence (proportion)      |

|                |        |             |           |   |   |                                      |
|----------------|--------|-------------|-----------|---|---|--------------------------------------|
| Uterine cancer | Female | 15-19 years | 95+ years | 1 | 1 | Log-transformed SEV scalar: Uterus C |
|----------------|--------|-------------|-----------|---|---|--------------------------------------|

*eTable 9: Comparison of GBD 2016 and GBD 2017 covariates used and level of covariates*

| Cause                   | Sex    | Covariate                                             | GBD 2016 |         |         | GBD 2017 |         |         |
|-------------------------|--------|-------------------------------------------------------|----------|---------|---------|----------|---------|---------|
|                         |        |                                                       | Level 1  | Level 2 | Level 3 | Level 1  | Level 2 | Level 3 |
| Acute lymphoid leukemia | Female | Alcohol (liters per capita)                           |          | X       |         |          | X       |         |
| Acute lymphoid leukemia | Male   | Alcohol (liters per capita)                           |          | X       |         |          | X       |         |
| Acute lymphoid leukemia | Female | Education (years per capita)                          |          |         | X       |          |         | X       |
| Acute lymphoid leukemia | Male   | Education (years per capita)                          |          |         | X       |          |         | X       |
| Acute lymphoid leukemia | Female | LDI (I\$ per capita)                                  |          |         | X       |          |         | X       |
| Acute lymphoid leukemia | Male   | LDI (I\$ per capita)                                  |          |         | X       |          |         | X       |
| Acute lymphoid leukemia | Female | Smoking Prevalence                                    |          | X       |         |          | X       |         |
| Acute lymphoid leukemia | Male   | Smoking Prevalence                                    |          | X       |         |          | X       |         |
| Acute lymphoid leukemia | Female | Socio-demographic Index                               |          |         | X       |          |         | X       |
| Acute lymphoid leukemia | Male   | Socio-demographic Index                               |          |         | X       |          |         | X       |
| Acute lymphoid leukemia | Female | Tobacco (cigarettes per capita)                       |          | X       |         |          | X       |         |
| Acute lymphoid leukemia | Male   | Tobacco (cigarettes per capita)                       |          | X       |         |          | X       |         |
| Acute lymphoid leukemia | Female | Cumulative Cigarettes (10 Years)                      |          | X       |         |          | X       |         |
| Acute lymphoid leukemia | Male   | Cumulative Cigarettes (10 Years)                      |          | X       |         |          | X       |         |
| Acute lymphoid leukemia | Female | Cumulative Cigarettes (15 Years)                      |          | X       |         |          | X       |         |
| Acute lymphoid leukemia | Male   | Cumulative Cigarettes (15 Years)                      |          | X       |         |          | X       |         |
| Acute lymphoid leukemia | Female | Cumulative Cigarettes (20 Years)                      |          | X       |         |          | X       |         |
| Acute lymphoid leukemia | Male   | Cumulative Cigarettes (20 Years)                      |          | X       |         |          | X       |         |
| Acute lymphoid leukemia | Female | Cumulative Cigarettes (5 Years)                       |          | X       |         |          | X       |         |
| Acute lymphoid leukemia | Male   | Cumulative Cigarettes (5 Years)                       |          | X       |         |          | X       |         |
| Acute lymphoid leukemia | Female | Log-transformed SEV scalar: Leukemia                  | X        |         |         | X        |         |         |
| Acute lymphoid leukemia | Male   | Log-transformed SEV scalar: Leukemia                  | X        |         |         | X        |         |         |
| Acute lymphoid leukemia | Female | Log-transformed age-standardized SEV scalar: Leukemia | X        |         |         | X        |         |         |
| Acute lymphoid leukemia | Male   | Log-transformed age-standardized SEV scalar: Leukemia | X        |         |         | X        |         |         |
| Acute myeloid leukemia  | Female | Alcohol (liters per capita)                           |          | X       |         |          | X       |         |

| Cause                  | Sex    | Covariate                                             | GBD 2016 |         |         | GBD 2017 |         |         |
|------------------------|--------|-------------------------------------------------------|----------|---------|---------|----------|---------|---------|
|                        |        |                                                       | Level 1  | Level 2 | Level 3 | Level 1  | Level 2 | Level 3 |
| Acute myeloid leukemia | Male   | Alcohol (liters per capita)                           |          | X       |         |          | X       |         |
| Acute myeloid leukemia | Female | Education (years per capita)                          |          |         | X       |          |         | X       |
| Acute myeloid leukemia | Male   | Education (years per capita)                          |          |         | X       |          |         | X       |
| Acute myeloid leukemia | Female | LDI (I\$ per capita)                                  |          |         | X       |          |         | X       |
| Acute myeloid leukemia | Male   | LDI (I\$ per capita)                                  |          |         | X       |          |         | X       |
| Acute myeloid leukemia | Female | Smoking Prevalence                                    |          | X       |         |          | X       |         |
| Acute myeloid leukemia | Male   | Smoking Prevalence                                    |          | X       |         |          | X       |         |
| Acute myeloid leukemia | Female | Socio-demographic Index                               |          |         | X       |          |         | X       |
| Acute myeloid leukemia | Male   | Socio-demographic Index                               |          |         | X       |          |         | X       |
| Acute myeloid leukemia | Male   | Healthcare access and quality index                   |          | X       |         |          | X       |         |
| Acute myeloid leukemia | Female | Tobacco (cigarettes per capita)                       |          | X       |         |          | X       |         |
| Acute myeloid leukemia | Male   | Tobacco (cigarettes per capita)                       |          | X       |         |          | X       |         |
| Acute myeloid leukemia | Female | Cumulative Cigarettes (10 Years)                      |          | X       |         |          | X       |         |
| Acute myeloid leukemia | Male   | Cumulative Cigarettes (10 Years)                      |          | X       |         |          | X       |         |
| Acute myeloid leukemia | Female | Cumulative Cigarettes (15 Years)                      |          | X       |         |          | X       |         |
| Acute myeloid leukemia | Male   | Cumulative Cigarettes (15 Years)                      |          | X       |         |          | X       |         |
| Acute myeloid leukemia | Female | Cumulative Cigarettes (20 Years)                      |          | X       |         |          | X       |         |
| Acute myeloid leukemia | Male   | Cumulative Cigarettes (20 Years)                      |          | X       |         |          | X       |         |
| Acute myeloid leukemia | Female | Cumulative Cigarettes (5 Years)                       |          | X       |         |          | X       |         |
| Acute myeloid leukemia | Male   | Cumulative Cigarettes (5 Years)                       |          | X       |         |          | X       |         |
| Acute myeloid leukemia | Female | Log-transformed SEV scalar: Leukemia                  | X        |         |         | X        |         |         |
| Acute myeloid leukemia | Male   | Log-transformed SEV scalar: Leukemia                  | X        |         |         | X        |         |         |
| Acute myeloid leukemia | Female | Log-transformed age-standardized SEV scalar: Leukemia | X        |         |         | X        |         |         |
| Acute myeloid leukemia | Male   | Log-transformed age-standardized SEV scalar: Leukemia | X        |         |         | X        |         |         |
| Bladder cancer         | Male   | Alcohol (liters per capita)                           |          | X       |         |          | X       |         |
| Bladder cancer         | Female | Alcohol (liters per capita)                           |          | X       |         |          | X       |         |
| Bladder cancer         | Male   | Education (years per capita)                          |          |         | X       |          |         | X       |
| Bladder cancer         | Female | Education (years per capita)                          |          |         | X       |          |         | X       |

| Cause                           | Sex    | Covariate                             | GBD 2016 |         |         | GBD 2017 |         |         |
|---------------------------------|--------|---------------------------------------|----------|---------|---------|----------|---------|---------|
|                                 |        |                                       | Level 1  | Level 2 | Level 3 | Level 1  | Level 2 | Level 3 |
| Bladder cancer                  | Male   | LDI (I\$ per capita)                  |          |         | X       |          |         | X       |
| Bladder cancer                  | Female | LDI (I\$ per capita)                  |          |         | X       |          |         | X       |
| Bladder cancer                  | Male   | Smoking Prevalence                    | X        |         |         | X        |         |         |
| Bladder cancer                  | Female | Smoking Prevalence                    | X        |         |         | X        |         |         |
| Bladder cancer                  | Male   | Socio-demographic Index               |          |         | X       |          |         | X       |
| Bladder cancer                  | Female | Socio-demographic Index               |          |         | X       |          |         | X       |
| Bladder cancer                  | Male   | Healthcare access and quality index   |          | X       |         |          | X       |         |
| Bladder cancer                  | Female | Healthcare access and quality index   |          | X       |         |          | X       |         |
| Bladder cancer                  | Male   | fruits adjusted (g)                   |          | X       |         |          | X       |         |
| Bladder cancer                  | Female | fruits adjusted (g)                   |          | X       |         |          | X       |         |
| Bladder cancer                  | Male   | vegetables adjusted (g)               |          | X       |         |          | X       |         |
| Bladder cancer                  | Female | vegetables adjusted (g)               |          | X       |         |          | X       |         |
| Bladder cancer                  | Male   | Cumulative Cigarettes (10 Years)      | X        |         |         | X        |         |         |
| Bladder cancer                  | Female | Cumulative Cigarettes (10 Years)      | X        |         |         | X        |         |         |
| Bladder cancer                  | Male   | Cumulative Cigarettes (15 Years)      | X        |         |         | X        |         |         |
| Bladder cancer                  | Female | Cumulative Cigarettes (15 Years)      | X        |         |         | X        |         |         |
| Bladder cancer                  | Male   | Cumulative Cigarettes (5 Years)       | X        |         |         | X        |         |         |
| Bladder cancer                  | Female | Cumulative Cigarettes (5 Years)       | X        |         |         | X        |         |         |
| Bladder cancer                  | Male   | Log-transformed SEV scalar: Bladder C | X        |         |         | X        |         |         |
| Bladder cancer                  | Female | Log-transformed SEV scalar: Bladder C | X        |         |         | X        |         |         |
| Brain and nervous system cancer | Female | Alcohol (liters per capita)           | X        |         |         | X        |         |         |
| Brain and nervous system cancer | Male   | Alcohol (liters per capita)           | X        |         |         | X        |         |         |
| Brain and nervous system cancer | Female | Education (years per capita)          |          |         | X       |          |         | X       |
| Brain and nervous system cancer | Male   | Education (years per capita)          |          |         | X       |          |         | X       |
| Brain and nervous system cancer | Female | LDI (I\$ per capita)                  |          |         | X       |          |         | X       |
| Brain and nervous system cancer | Male   | LDI (I\$ per capita)                  |          |         | X       |          |         | X       |
| Brain and nervous system cancer | Female | Smoking Prevalence                    | X        |         |         | X        |         |         |
| Brain and nervous system cancer | Male   | Smoking Prevalence                    | X        |         |         | X        |         |         |
| Brain and nervous system cancer | Female | Socio-demographic Index               |          |         | X       |          |         | X       |
| Brain and nervous system cancer | Male   | Socio-demographic Index               |          |         | X       |          |         | X       |



| Cause                           | Sex    | Covariate                            | GBD 2016 |         |         | GBD 2017 |         |         |
|---------------------------------|--------|--------------------------------------|----------|---------|---------|----------|---------|---------|
|                                 |        |                                      | Level 1  | Level 2 | Level 3 | Level 1  | Level 2 | Level 3 |
| Brain and nervous system cancer | Female | Healthcare access and quality index  |          | X       |         |          | X       |         |
| Brain and nervous system cancer | Male   | Healthcare access and quality index  |          | X       |         |          | X       |         |
| Brain and nervous system cancer | Female | fruits adjusted (g)                  |          | X       |         |          | X       |         |
| Brain and nervous system cancer | Male   | fruits adjusted (g)                  |          | X       |         |          | X       |         |
| Brain and nervous system cancer | Female | vegetables adjusted (g)              |          | X       |         |          | X       |         |
| Brain and nervous system cancer | Male   | vegetables adjusted (g)              |          | X       |         |          | X       |         |
| Brain and nervous system cancer | Female | Cumulative Cigarettes (10 Years)     | X        |         |         | X        |         |         |
| Brain and nervous system cancer | Male   | Cumulative Cigarettes (10 Years)     | X        |         |         | X        |         |         |
| Brain and nervous system cancer | Female | Cumulative Cigarettes (15 Years)     | X        |         |         | X        |         |         |
| Brain and nervous system cancer | Male   | Cumulative Cigarettes (15 Years)     | X        |         |         | X        |         |         |
| Brain and nervous system cancer | Female | red meats adjusted (g)               |          | X       |         |          | X       |         |
| Brain and nervous system cancer | Male   | red meats adjusted (g)               |          | X       |         |          | X       |         |
| Brain and nervous system cancer | Female | Systolic Blood Pressure (mmHg)       |          | X       |         |          | X       |         |
| Brain and nervous system cancer | Male   | Systolic Blood Pressure (mmHg)       |          | X       |         |          | X       |         |
| Brain and nervous system cancer | Female | Cholesterol (total, mean per capita) |          | X       |         |          | X       |         |
| Brain and nervous system cancer | Male   | Cholesterol (total, mean per capita) |          | X       |         |          | X       |         |
| Breast cancer                   | Male   | Alcohol (liters per capita)          | X        |         |         | X        |         |         |
| Breast cancer                   | Female | Alcohol (liters per capita)          | X        |         |         | X        |         |         |
| Breast cancer                   | Male   | Education (years per capita)         |          |         | X       |          |         | X       |
| Breast cancer                   | Female | Education (years per capita)         |          |         | X       |          |         | X       |
| Breast cancer                   | Male   | LDI (I\$ per capita)                 |          |         | X       |          |         | X       |
| Breast cancer                   | Female | LDI (I\$ per capita)                 |          |         | X       |          |         | X       |
| Breast cancer                   | Male   | Socio-demographic Index              |          |         | X       |          |         | X       |
| Breast cancer                   | Female | Socio-demographic Index              |          |         | X       |          |         | X       |
| Breast cancer                   | Male   | Healthcare access and quality index  |          | X       |         |          | X       |         |
| Breast cancer                   | Female | Healthcare access and quality index  |          | X       |         |          | X       |         |
| Breast cancer                   | Male   | Mean BMI                             | X        |         |         | X        |         |         |
| Breast cancer                   | Female | Mean BMI                             | X        |         |         | X        |         |         |
| Breast cancer                   | Female | Total Fertility Rate                 |          | X       |         |          | X       |         |
| Breast cancer                   | Female | Age-Specific Fertility Rate          |          | X       |         |          | X       |         |

| Cause                     | Sex    | Covariate                            | GBD 2016 |         |         | GBD 2017 |         |         |
|---------------------------|--------|--------------------------------------|----------|---------|---------|----------|---------|---------|
|                           |        |                                      | Level 1  | Level 2 | Level 3 | Level 1  | Level 2 | Level 3 |
| Breast cancer             | Male   | fruits adjusted (g)                  |          | X       |         |          | X       |         |
| Breast cancer             | Female | fruits adjusted (g)                  |          | X       |         |          | X       |         |
| Breast cancer             | Male   | vegetables adjusted (g)              |          | X       |         |          | X       |         |
| Breast cancer             | Female | vegetables adjusted (g)              |          | X       |         |          | X       |         |
| Breast cancer             | Male   | Cumulative Cigarettes (10 Years)     |          | X       |         |          | X       |         |
| Breast cancer             | Female | Cumulative Cigarettes (10 Years)     |          | X       |         |          | X       |         |
| Breast cancer             | Male   | Log-transformed SEV scalar: Breast C | X        |         |         | X        |         |         |
| Breast cancer             | Female | Log-transformed SEV scalar: Breast C | X        |         |         | X        |         |         |
| Cervical cancer           | Female | Education (years per capita)         |          |         | X       |          |         | X       |
| Cervical cancer           | Female | LDI (I\$ per capita)                 |          |         | X       |          |         | X       |
| Cervical cancer           | Female | Smoking Prevalence                   |          | X       |         |          | X       |         |
| Cervical cancer           | Female | Socio-demographic Index              |          |         | X       |          |         | X       |
| Cervical cancer           | Female | Healthcare access and quality index  |          | X       |         |          | X       |         |
| Cervical cancer           | Female | Total Fertility Rate                 |          | X       |         |          | X       |         |
| Cervical cancer           | Female | Age-Specific Fertility Rate          |          | X       |         |          | X       |         |
| Cervical cancer           | Female | fruits adjusted (g)                  |          | X       |         |          | X       |         |
| Cervical cancer           | Female | vegetables adjusted (g)              |          | X       |         |          | X       |         |
| Cervical cancer           | Female | Cumulative Cigarettes (10 Years)     | X        |         |         | X        |         |         |
| Cervical cancer           | Female | Cumulative Cigarettes (15 Years)     | X        |         |         | X        |         |         |
| Cervical cancer           | Female | Cumulative Cigarettes (5 Years)      | X        |         |         | X        |         |         |
| Cervical cancer           | Female | HIV age-standardized prevalence      | X        |         |         | X        |         |         |
| Chronic lymphoid leukemia | Male   | Alcohol (liters per capita)          |          | X       |         |          | X       |         |
| Chronic lymphoid leukemia | Female | Alcohol (liters per capita)          |          | X       |         |          | X       |         |
| Chronic lymphoid leukemia | Male   | Education (years per capita)         |          |         | X       |          |         | X       |
| Chronic lymphoid leukemia | Female | Education (years per capita)         |          |         | X       |          |         | X       |
| Chronic lymphoid leukemia | Male   | LDI (I\$ per capita)                 |          |         | X       |          |         | X       |
| Chronic lymphoid leukemia | Female | LDI (I\$ per capita)                 |          |         | X       |          |         | X       |
| Chronic lymphoid leukemia | Male   | Smoking Prevalence                   |          | X       |         |          | X       |         |
| Chronic lymphoid leukemia | Female | Smoking Prevalence                   |          | X       |         |          | X       |         |
| Chronic lymphoid leukemia | Male   | Socio-demographic Index              |          |         | X       |          |         | X       |

| Cause                     | Sex    | Covariate                                             | GBD 2016 |         |         | GBD 2017 |         |         |
|---------------------------|--------|-------------------------------------------------------|----------|---------|---------|----------|---------|---------|
|                           |        |                                                       | Level 1  | Level 2 | Level 3 | Level 1  | Level 2 | Level 3 |
| Chronic lymphoid leukemia | Female | Socio-demographic Index                               |          |         | X       |          |         | X       |
| Chronic lymphoid leukemia | Male   | Tobacco (cigarettes per capita)                       |          | X       |         |          | X       |         |
| Chronic lymphoid leukemia | Female | Tobacco (cigarettes per capita)                       |          | X       |         |          | X       |         |
| Chronic lymphoid leukemia | Male   | Cumulative Cigarettes (10 Years)                      |          | X       |         |          | X       |         |
| Chronic lymphoid leukemia | Female | Cumulative Cigarettes (10 Years)                      |          | X       |         |          | X       |         |
| Chronic lymphoid leukemia | Male   | Cumulative Cigarettes (15 Years)                      |          | X       |         |          | X       |         |
| Chronic lymphoid leukemia | Female | Cumulative Cigarettes (15 Years)                      |          | X       |         |          | X       |         |
| Chronic lymphoid leukemia | Male   | Cumulative Cigarettes (20 Years)                      |          | X       |         |          | X       |         |
| Chronic lymphoid leukemia | Female | Cumulative Cigarettes (20 Years)                      |          | X       |         |          | X       |         |
| Chronic lymphoid leukemia | Male   | Cumulative Cigarettes (5 Years)                       |          | X       |         |          | X       |         |
| Chronic lymphoid leukemia | Female | Cumulative Cigarettes (5 Years)                       |          | X       |         |          | X       |         |
| Chronic lymphoid leukemia | Male   | Log-transformed SEV scalar: Leukemia                  | X        |         |         | X        |         |         |
| Chronic lymphoid leukemia | Female | Log-transformed SEV scalar: Leukemia                  | X        |         |         | X        |         |         |
| Chronic lymphoid leukemia | Male   | Log-transformed age-standardized SEV scalar: Leukemia | X        |         |         | X        |         |         |
| Chronic lymphoid leukemia | Female | Log-transformed age-standardized SEV scalar: Leukemia | X        |         |         | X        |         |         |
| Chronic myeloid leukemia  | Female | Alcohol (liters per capita)                           |          | X       |         |          | X       |         |
| Chronic myeloid leukemia  | Male   | Alcohol (liters per capita)                           |          | X       |         |          | X       |         |
| Chronic myeloid leukemia  | Female | Education (years per capita)                          |          |         | X       |          |         | X       |
| Chronic myeloid leukemia  | Male   | Education (years per capita)                          |          |         | X       |          |         | X       |
| Chronic myeloid leukemia  | Female | LDI (I\$ per capita)                                  |          |         | X       |          |         | X       |
| Chronic myeloid leukemia  | Male   | LDI (I\$ per capita)                                  |          |         | X       |          |         | X       |
| Chronic myeloid leukemia  | Female | Smoking Prevalence                                    |          | X       |         |          | X       |         |
| Chronic myeloid leukemia  | Male   | Smoking Prevalence                                    |          | X       |         |          | X       |         |
| Chronic myeloid leukemia  | Female | Socio-demographic Index                               |          |         | X       |          |         | X       |
| Chronic myeloid leukemia  | Male   | Socio-demographic Index                               |          |         | X       |          |         | X       |
| Chronic myeloid leukemia  | Female | Healthcare access and quality index                   |          | X       |         |          | X       |         |
| Chronic myeloid leukemia  | Male   | Healthcare access and quality index                   |          | X       |         |          | X       |         |
| Chronic myeloid leukemia  | Female | Tobacco (cigarettes per capita)                       |          | X       |         |          | X       |         |

| Cause                    | Sex    | Covariate                                             | GBD 2016 |         |         | GBD 2017 |         |         |
|--------------------------|--------|-------------------------------------------------------|----------|---------|---------|----------|---------|---------|
|                          |        |                                                       | Level 1  | Level 2 | Level 3 | Level 1  | Level 2 | Level 3 |
| Chronic myeloid leukemia | Male   | Tobacco (cigarettes per capita)                       |          | X       |         |          | X       |         |
| Chronic myeloid leukemia | Female | Cumulative Cigarettes (10 Years)                      |          | X       |         |          | X       |         |
| Chronic myeloid leukemia | Male   | Cumulative Cigarettes (10 Years)                      |          | X       |         |          | X       |         |
| Chronic myeloid leukemia | Female | Cumulative Cigarettes (15 Years)                      |          | X       |         |          | X       |         |
| Chronic myeloid leukemia | Male   | Cumulative Cigarettes (15 Years)                      |          | X       |         |          | X       |         |
| Chronic myeloid leukemia | Female | Cumulative Cigarettes (20 Years)                      |          | X       |         |          | X       |         |
| Chronic myeloid leukemia | Male   | Cumulative Cigarettes (20 Years)                      |          | X       |         |          | X       |         |
| Chronic myeloid leukemia | Female | Cumulative Cigarettes (5 Years)                       |          | X       |         |          | X       |         |
| Chronic myeloid leukemia | Male   | Cumulative Cigarettes (5 Years)                       |          | X       |         |          | X       |         |
| Chronic myeloid leukemia | Female | Log-transformed age-standardized SEV scalar: Leukemia | X        |         |         | X        |         |         |
| Chronic myeloid leukemia | Male   | Log-transformed age-standardized SEV scalar: Leukemia | X        |         |         | X        |         |         |
| Colon and rectum cancer  | Male   | Alcohol (liters per capita)                           | X        |         |         | X        |         |         |
| Colon and rectum cancer  | Female | Alcohol (liters per capita)                           | X        |         |         | X        |         |         |
| Colon and rectum cancer  | Male   | Education (years per capita)                          |          |         | X       |          |         | X       |
| Colon and rectum cancer  | Female | Education (years per capita)                          |          |         | X       |          |         | X       |
| Colon and rectum cancer  | Male   | LDI (I\$ per capita)                                  |          |         | X       |          |         | X       |
| Colon and rectum cancer  | Female | LDI (I\$ per capita)                                  |          |         | X       |          |         | X       |
| Colon and rectum cancer  | Male   | Smoking Prevalence                                    | X        |         |         | X        |         |         |
| Colon and rectum cancer  | Female | Smoking Prevalence                                    |          | X       |         | X        |         |         |
| Colon and rectum cancer  | Male   | Socio-demographic Index                               |          |         | X       |          |         | X       |
| Colon and rectum cancer  | Female | Socio-demographic Index                               |          |         | X       |          |         | X       |
| Colon and rectum cancer  | Male   | Healthcare access and quality index                   |          | X       |         |          | X       |         |
| Colon and rectum cancer  | Female | Healthcare access and quality index                   |          | X       |         |          | X       |         |
| Colon and rectum cancer  | Male   | Mean BMI                                              | X        |         |         | X        |         |         |
| Colon and rectum cancer  | Female | Mean BMI                                              | X        |         |         | X        |         |         |
| Colon and rectum cancer  | Male   | Tobacco (cigarettes per capita)                       | X        |         |         | X        |         |         |
| Colon and rectum cancer  | Female | Tobacco (cigarettes per capita)                       |          | X       |         | X        |         |         |
| Colon and rectum cancer  | Male   | fruits adjusted (g)                                   |          | X       |         |          | X       |         |

| Cause                   | Sex    | Covariate                                | GBD 2016 |         |         | GBD 2017 |         |         |
|-------------------------|--------|------------------------------------------|----------|---------|---------|----------|---------|---------|
|                         |        |                                          | Level 1  | Level 2 | Level 3 | Level 1  | Level 2 | Level 3 |
| Colon and rectum cancer | Female | fruits adjusted (g)                      | X        |         |         |          | X       |         |
| Colon and rectum cancer | Female | fruits adjusted (g)                      |          | X       |         |          | X       |         |
| Colon and rectum cancer | Male   | vegetables adjusted (g)                  |          | X       |         |          | X       |         |
| Colon and rectum cancer | Female | vegetables adjusted (g)                  | X        |         |         |          | X       |         |
| Colon and rectum cancer | Female | vegetables adjusted (g)                  |          | X       |         |          | X       |         |
| Colon and rectum cancer | Male   | red meats adjusted (g)                   | X        |         |         | X        |         |         |
| Colon and rectum cancer | Female | red meats adjusted (g)                   | X        |         |         | X        |         |         |
| Colon and rectum cancer | Male   | Log-transformed SEV scalar: Colorect C   | X        |         |         | X        |         |         |
| Colon and rectum cancer | Female | Log-transformed SEV scalar: Colorect C   | X        |         |         | X        |         |         |
| Colon and rectum cancer | Male   | milk adjusted (g)                        |          | X       |         |          | X       |         |
| Colon and rectum cancer | Female | milk adjusted (g)                        |          | X       |         |          | X       |         |
| Colon and rectum cancer | Male   | nuts seeds adjusted (g)                  |          | X       |         |          | X       |         |
| Colon and rectum cancer | Female | nuts seeds adjusted (g)                  |          | X       |         |          | X       |         |
| Colon and rectum cancer | Male   | PUFA adjusted(percent)                   |          | X       |         |          | X       |         |
| Colon and rectum cancer | Female | PUFA adjusted(percent)                   |          | X       |         |          | X       |         |
| Esophageal cancer       | Male   | Alcohol (liters per capita)              | X        |         |         | X        |         |         |
| Esophageal cancer       | Female | Alcohol (liters per capita)              | X        |         |         | X        |         |         |
| Esophageal cancer       | Male   | Education (years per capita)             |          |         | X       |          |         | X       |
| Esophageal cancer       | Female | Education (years per capita)             |          |         | X       |          |         | X       |
| Esophageal cancer       | Male   | LDI (I\$ per capita)                     |          |         | X       |          |         | X       |
| Esophageal cancer       | Female | LDI (I\$ per capita)                     |          |         | X       |          |         | X       |
| Esophageal cancer       | Male   | Indoor Air Pollution (All Cooking Fuels) |          | X       |         |          | X       |         |
| Esophageal cancer       | Female | Indoor Air Pollution (All Cooking Fuels) |          | X       |         |          | X       |         |
| Esophageal cancer       | Male   | Smoking Prevalence                       | X        |         |         | X        |         |         |
| Esophageal cancer       | Female | Smoking Prevalence                       | X        |         |         | X        |         |         |
| Esophageal cancer       | Male   | Socio-demographic Index                  |          | X       |         |          |         | X       |
| Esophageal cancer       | Female | Socio-demographic Index                  |          |         | X       |          |         | X       |
| Esophageal cancer       | Female | Socio-demographic Index                  |          | X       |         |          |         | X       |
| Esophageal cancer       | Male   | Healthcare access and quality index      |          | X       |         |          | X       |         |
| Esophageal cancer       | Female | Healthcare access and quality index      |          | X       |         |          | X       |         |

| Cause                                | Sex    | Covariate                                              | GBD 2016 |         |         | GBD 2017 |         |         |
|--------------------------------------|--------|--------------------------------------------------------|----------|---------|---------|----------|---------|---------|
|                                      |        |                                                        | Level 1  | Level 2 | Level 3 | Level 1  | Level 2 | Level 3 |
| Esophageal cancer                    | Male   | Mean BMI                                               | X        |         |         | X        |         |         |
| Esophageal cancer                    | Female | Mean BMI                                               | X        |         |         | X        |         |         |
| Esophageal cancer                    | Male   | Sanitation (proportion with access)                    |          | X       |         |          | X       |         |
| Esophageal cancer                    | Female | Sanitation (proportion with access)                    |          | X       |         |          | X       |         |
| Esophageal cancer                    | Male   | Improved Water Source (proportion with access)         |          | X       |         |          | X       |         |
| Esophageal cancer                    | Female | Improved Water Source (proportion with access)         |          | X       |         |          | X       |         |
| Esophageal cancer                    | Male   | Tobacco (cigarettes per capita)                        | X        |         |         | X        |         |         |
| Esophageal cancer                    | Female | Tobacco (cigarettes per capita)                        | X        |         |         | X        |         |         |
| Esophageal cancer                    | Male   | Log-transformed age-standardized SEV scalar: Esophag C | X        |         |         | X        |         |         |
| Esophageal cancer                    | Female | Log-transformed age-standardized SEV scalar: Esophag C | X        |         |         | X        |         |         |
| Esophageal cancer                    | Female | fruits adjusted (g)                                    |          | X       |         | X        |         |         |
| Esophageal cancer                    | Male   | fruits adjusted (g)                                    |          | X       |         | X        |         |         |
| Esophageal cancer                    | Female | vegetables adjusted (g)                                |          | X       |         |          | X       |         |
| Esophageal cancer                    | Male   | vegetables adjusted (g)                                |          | X       |         |          | X       |         |
| Esophageal cancer                    | Male   | Log-transformed SEV scalar: Esophag C                  | X        |         |         | X        |         |         |
| Gallbladder and biliary tract cancer | Female | Alcohol (liters per capita)                            |          | X       |         |          | X       |         |
| Gallbladder and biliary tract cancer | Male   | Alcohol (liters per capita)                            |          | X       |         |          | X       |         |
| Gallbladder and biliary tract cancer | Female | Education (years per capita)                           |          |         | X       |          |         | X       |
| Gallbladder and biliary tract cancer | Male   | Education (years per capita)                           |          |         | X       |          |         | X       |
| Gallbladder and biliary tract cancer | Female | LDI (I\$ per capita)                                   |          |         | X       |          |         | X       |
| Gallbladder and biliary tract cancer | Male   | LDI (I\$ per capita)                                   |          |         | X       |          |         | X       |
| Gallbladder and biliary tract cancer | Female | Smoking Prevalence                                     |          | X       |         |          | X       |         |
| Gallbladder and biliary tract cancer | Male   | Smoking Prevalence                                     |          | X       |         |          | X       |         |
| Gallbladder and biliary tract cancer | Female | Socio-demographic Index                                |          |         | X       |          |         | X       |
| Gallbladder and biliary tract cancer | Male   | Socio-demographic Index                                |          |         | X       |          |         | X       |
| Gallbladder and biliary tract cancer | Female | Healthcare access and quality index                    |          | X       |         |          | X       |         |

| Cause                                | Sex    | Covariate                                         | GBD 2016 |         |         | GBD 2017 |         |         |
|--------------------------------------|--------|---------------------------------------------------|----------|---------|---------|----------|---------|---------|
|                                      |        |                                                   | Level 1  | Level 2 | Level 3 | Level 1  | Level 2 | Level 3 |
| Gallbladder and biliary tract cancer | Male   | Healthcare access and quality index               |          | X       |         |          | X       |         |
| Gallbladder and biliary tract cancer | Female | Mean BMI                                          | X        |         |         | X        |         |         |
| Gallbladder and biliary tract cancer | Male   | Mean BMI                                          | X        |         |         | X        |         |         |
| Gallbladder and biliary tract cancer | Female | Tobacco (cigarettes per capita)                   |          | X       |         |          | X       |         |
| Gallbladder and biliary tract cancer | Male   | Tobacco (cigarettes per capita)                   |          | X       |         |          | X       |         |
| Gallbladder and biliary tract cancer | Female | fruits adjusted (g)                               |          | X       |         |          | X       |         |
| Gallbladder and biliary tract cancer | Male   | fruits adjusted (g)                               |          | X       |         |          | X       |         |
| Gallbladder and biliary tract cancer | Female | vegetables adjusted (g)                           |          | X       |         |          | X       |         |
| Gallbladder and biliary tract cancer | Male   | vegetables adjusted (g)                           |          | X       |         |          | X       |         |
| Gallbladder and biliary tract cancer | Female | Cumulative Cigarettes (10 Years)                  |          | X       |         |          | X       |         |
| Gallbladder and biliary tract cancer | Male   | Cumulative Cigarettes (10 Years)                  |          | X       |         |          | X       |         |
| Gallbladder and biliary tract cancer | Female | Diabetes Age-Standardized Prevalence (proportion) |          | X       |         |          | X       |         |
| Gallbladder and biliary tract cancer | Male   | Diabetes Age-Standardized Prevalence (proportion) |          | X       |         |          | X       |         |
| Gallbladder and biliary tract cancer | Female | Cumulative Cigarettes (5 Years)                   |          | X       |         |          | X       |         |
| Gallbladder and biliary tract cancer | Male   | Cumulative Cigarettes (5 Years)                   |          | X       |         |          | X       |         |
| Gallbladder and biliary tract cancer | Female | Log-transformed SEV scalar: Gallblad C            | X        |         |         | X        |         |         |
| Gallbladder and biliary tract cancer | Male   | Log-transformed SEV scalar: Gallblad C            | X        |         |         | X        |         |         |
| Hodgkin lymphoma                     | Male   | Education (years per capita)                      |          |         | X       |          |         | X       |
| Hodgkin lymphoma                     | Female | Education (years per capita)                      |          |         | X       |          |         | X       |
| Hodgkin lymphoma                     | Male   | LDI (I\$ per capita)                              |          |         | X       |          |         | X       |
| Hodgkin lymphoma                     | Female | LDI (I\$ per capita)                              |          |         | X       |          |         | X       |
| Hodgkin lymphoma                     | Male   | Socio-demographic Index                           |          |         | X       |          |         | X       |
| Hodgkin lymphoma                     | Female | Socio-demographic Index                           |          |         | X       |          |         | X       |
| Hodgkin lymphoma                     | Male   | Healthcare access and quality index               |          | X       |         |          | X       |         |
| Hodgkin lymphoma                     | Female | Healthcare access and quality index               |          | X       |         |          | X       |         |
| Kidney cancer                        | Male   | Alcohol (liters per capita)                       |          | X       |         |          | X       |         |
| Kidney cancer                        | Female | Alcohol (liters per capita)                       |          | X       |         |          | X       |         |
| Kidney cancer                        | Male   | Education (years per capita)                      |          |         | X       |          |         | X       |

| Cause         | Sex    | Covariate                                         | GBD 2016 |         |         | GBD 2017 |         |         |
|---------------|--------|---------------------------------------------------|----------|---------|---------|----------|---------|---------|
|               |        |                                                   | Level 1  | Level 2 | Level 3 | Level 1  | Level 2 | Level 3 |
| Kidney cancer | Female | Education (years per capita)                      |          |         | X       |          |         | X       |
| Kidney cancer | Male   | LDI (I\$ per capita)                              |          |         | X       |          |         | X       |
| Kidney cancer | Female | LDI (I\$ per capita)                              |          |         | X       |          |         | X       |
| Kidney cancer | Male   | Smoking Prevalence                                |          | X       |         |          | X       |         |
| Kidney cancer | Female | Smoking Prevalence                                |          | X       |         |          | X       |         |
| Kidney cancer | Male   | Socio-demographic Index                           |          |         | X       |          |         | X       |
| Kidney cancer | Female | Socio-demographic Index                           |          |         | X       |          |         | X       |
| Kidney cancer | Male   | Mean BMI                                          | X        |         |         | X        |         |         |
| Kidney cancer | Female | Mean BMI                                          | X        |         |         | X        |         |         |
| Kidney cancer | Male   | Cumulative Cigarettes (10 Years)                  | X        |         |         | X        |         |         |
| Kidney cancer | Female | Cumulative Cigarettes (10 Years)                  | X        |         |         | X        |         |         |
| Kidney cancer | Male   | Cumulative Cigarettes (15 Years)                  | X        |         |         | X        |         |         |
| Kidney cancer | Female | Cumulative Cigarettes (15 Years)                  | X        |         |         | X        |         |         |
| Kidney cancer | Male   | Diabetes Age-Standardized Prevalence (proportion) |          | X       |         |          | X       |         |
| Kidney cancer | Female | Diabetes Age-Standardized Prevalence (proportion) |          | X       |         |          | X       |         |
| Kidney cancer | Male   | Cumulative Cigarettes (5 Years)                   | X        |         |         | X        |         |         |
| Kidney cancer | Female | Cumulative Cigarettes (5 Years)                   | X        |         |         | X        |         |         |
| Kidney cancer | Male   | Systolic Blood Pressure (mmHg)                    |          | X       |         |          | X       |         |
| Kidney cancer | Female | Systolic Blood Pressure (mmHg)                    |          | X       |         |          | X       |         |
| Kidney cancer | Male   | Log-transformed SEV scalar: Kidney C              | X        |         |         | X        |         |         |
| Kidney cancer | Female | Log-transformed SEV scalar: Kidney C              | X        |         |         | X        |         |         |
| Larynx cancer | Male   | Alcohol (liters per capita)                       | X        |         |         | X        |         |         |
| Larynx cancer | Female | Alcohol (liters per capita)                       | X        |         |         | X        |         |         |
| Larynx cancer | Male   | Education (years per capita)                      |          |         | X       |          |         | X       |
| Larynx cancer | Female | Education (years per capita)                      |          |         | X       |          |         | X       |
| Larynx cancer | Male   | LDI (I\$ per capita)                              |          |         | X       |          |         | X       |
| Larynx cancer | Female | LDI (I\$ per capita)                              |          |         | X       |          |         | X       |



| Cause         | Sex    | Covariate                                           | GBD 2016 |         |         | GBD 2017 |         |         |
|---------------|--------|-----------------------------------------------------|----------|---------|---------|----------|---------|---------|
|               |        |                                                     | Level 1  | Level 2 | Level 3 | Level 1  | Level 2 | Level 3 |
| Larynx cancer | Male   | Population Density (over 1000 ppl/sqkm, proportion) |          | X       |         |          | X       |         |
| Larynx cancer | Female | Population Density (over 1000 ppl/sqkm, proportion) |          | X       |         |          | X       |         |
| Larynx cancer | Male   | Smoking Prevalence                                  |          | X       |         |          | X       |         |
| Larynx cancer | Female | Smoking Prevalence                                  |          | X       |         |          | X       |         |
| Larynx cancer | Male   | Socio-demographic Index                             |          |         | X       |          |         | X       |
| Larynx cancer | Female | Socio-demographic Index                             |          |         | X       |          |         | X       |
| Larynx cancer | Male   | Healthcare access and quality index                 |          | X       |         |          | X       |         |
| Larynx cancer | Female | Healthcare access and quality index                 |          | X       |         |          | X       |         |
| Larynx cancer | Male   | Population Density (under 150 ppl/sqkm, proportion) |          | X       |         |          | X       |         |
| Larynx cancer | Female | Population Density (under 150 ppl/sqkm, proportion) |          | X       |         |          | X       |         |
| Larynx cancer | Male   | Tobacco (cigarettes per capita)                     |          | X       |         |          | X       |         |
| Larynx cancer | Female | Tobacco (cigarettes per capita)                     |          | X       |         |          | X       |         |
| Larynx cancer | Male   | fruits adjusted (g)                                 |          | X       |         |          | X       |         |
| Larynx cancer | Female | fruits adjusted (g)                                 |          | X       |         |          | X       |         |
| Larynx cancer | Male   | vegetables adjusted (g)                             |          | X       |         |          | X       |         |
| Larynx cancer | Female | vegetables adjusted (g)                             |          | X       |         |          | X       |         |
| Larynx cancer | Male   | Cumulative Cigarettes (10 Years)                    |          | X       |         |          | X       |         |
| Larynx cancer | Female | Cumulative Cigarettes (10 Years)                    |          | X       |         |          | X       |         |
| Larynx cancer | Male   | Cumulative Cigarettes (15 Years)                    |          | X       |         |          | X       |         |
| Larynx cancer | Female | Cumulative Cigarettes (15 Years)                    |          | X       |         |          | X       |         |
| Larynx cancer | Male   | Cumulative Cigarettes (20 Years)                    |          | X       |         |          | X       |         |
| Larynx cancer | Female | Cumulative Cigarettes (20 Years)                    |          | X       |         |          | X       |         |
| Larynx cancer | Male   | Cumulative Cigarettes (5 Years)                     |          | X       |         |          | X       |         |
| Larynx cancer | Female | Cumulative Cigarettes (5 Years)                     |          | X       |         |          | X       |         |
| Larynx cancer | Male   | Log-transformed SEV scalar: Larynx C                | X        |         |         | X        |         |         |
| Larynx cancer | Female | Log-transformed SEV scalar: Larynx C                | X        |         |         | X        |         |         |

| Cause                      | Sex    | Covariate                                             | GBD 2016 |         |         | GBD 2017 |         |         |
|----------------------------|--------|-------------------------------------------------------|----------|---------|---------|----------|---------|---------|
|                            |        |                                                       | Level 1  | Level 2 | Level 3 | Level 1  | Level 2 | Level 3 |
| Leukemia                   | Female | Alcohol (liters per capita)                           |          | X       |         |          | X       |         |
| Leukemia                   | Male   | Alcohol (liters per capita)                           |          | X       |         |          | X       |         |
| Leukemia                   | Female | Education (years per capita)                          |          |         | X       |          |         | X       |
| Leukemia                   | Male   | Education (years per capita)                          |          |         | X       |          |         | X       |
| Leukemia                   | Female | LDI (I\$ per capita)                                  |          |         | X       |          |         | X       |
| Leukemia                   | Male   | LDI (I\$ per capita)                                  |          |         | X       |          |         | X       |
| Leukemia                   | Female | Smoking Prevalence                                    |          | X       |         |          | X       |         |
| Leukemia                   | Male   | Smoking Prevalence                                    |          | X       |         |          | X       |         |
| Leukemia                   | Female | Socio-demographic Index                               |          |         | X       |          |         | X       |
| Leukemia                   | Male   | Socio-demographic Index                               |          |         | X       |          |         | X       |
| Leukemia                   | Female | Healthcare access and quality index                   |          | X       |         |          | X       |         |
| Leukemia                   | Female | Tobacco (cigarettes per capita)                       |          | X       |         |          | X       |         |
| Leukemia                   | Male   | Tobacco (cigarettes per capita)                       |          | X       |         |          | X       |         |
| Leukemia                   | Female | Cumulative Cigarettes (10 Years)                      |          | X       |         |          | X       |         |
| Leukemia                   | Male   | Cumulative Cigarettes (10 Years)                      |          | X       |         |          | X       |         |
| Leukemia                   | Female | Cumulative Cigarettes (15 Years)                      |          | X       |         |          | X       |         |
| Leukemia                   | Male   | Cumulative Cigarettes (15 Years)                      |          | X       |         |          | X       |         |
| Leukemia                   | Female | Cumulative Cigarettes (20 Years)                      |          | X       |         |          | X       |         |
| Leukemia                   | Male   | Cumulative Cigarettes (20 Years)                      |          | X       |         |          | X       |         |
| Leukemia                   | Female | Cumulative Cigarettes (5 Years)                       |          | X       |         |          | X       |         |
| Leukemia                   | Male   | Cumulative Cigarettes (5 Years)                       |          | X       |         |          | X       |         |
| Leukemia                   | Female | Log-transformed SEV scalar: Leukemia                  | X        |         |         | X        |         |         |
| Leukemia                   | Male   | Log-transformed SEV scalar: Leukemia                  | X        |         |         | X        |         |         |
| Leukemia                   | Female | Log-transformed age-standardized SEV scalar: Leukemia | X        |         |         | X        |         |         |
| Leukemia                   | Male   | Log-transformed age-standardized SEV scalar: Leukemia | X        |         |         | X        |         |         |
| Lip and oral cavity cancer | Male   | Alcohol (liters per capita)                           | X        |         |         | X        |         |         |
| Lip and oral cavity cancer | Female | Alcohol (liters per capita)                           | X        |         |         | X        |         |         |
| Lip and oral cavity cancer | Male   | Education (years per capita)                          |          |         | X       |          |         | X       |

| Cause                      | Sex    | Covariate                           | GBD 2016 |         |         | GBD 2017 |         |         |
|----------------------------|--------|-------------------------------------|----------|---------|---------|----------|---------|---------|
|                            |        |                                     | Level 1  | Level 2 | Level 3 | Level 1  | Level 2 | Level 3 |
| Lip and oral cavity cancer | Female | Education (years per capita)        |          |         | X       |          |         | X       |
| Lip and oral cavity cancer | Male   | LDI (I\$ per capita)                |          |         | X       |          |         | X       |
| Lip and oral cavity cancer | Female | LDI (I\$ per capita)                |          |         | X       |          |         | X       |
| Lip and oral cavity cancer | Male   | Smoking Prevalence                  | X        |         |         | X        |         |         |
| Lip and oral cavity cancer | Female | Smoking Prevalence                  | X        |         |         | X        |         |         |
| Lip and oral cavity cancer | Male   | Socio-demographic Index             |          |         | X       |          |         | X       |
| Lip and oral cavity cancer | Female | Socio-demographic Index             |          |         | X       |          |         | X       |
| Lip and oral cavity cancer | Male   | Healthcare access and quality index |          | X       |         |          | X       |         |
| Lip and oral cavity cancer | Female | Healthcare access and quality index |          | X       |         |          | X       |         |
| Lip and oral cavity cancer | Female | Health System Access 2 (unitless)   |          | X       |         |          | X       |         |
| Lip and oral cavity cancer | Male   | Tobacco (cigarettes per capita)     | X        |         |         | X        |         |         |
| Lip and oral cavity cancer | Male   | fruits adjusted (g)                 |          | X       |         |          | X       |         |
| Lip and oral cavity cancer | Male   | vegetables adjusted (g)             |          | X       |         | X        |         |         |
| Lip and oral cavity cancer | Male   | Cumulative Cigarettes (10 Years)    | X        |         |         | X        |         |         |
| Lip and oral cavity cancer | Female | Cumulative Cigarettes (10 Years)    | X        |         |         | X        |         |         |
| Lip and oral cavity cancer | Male   | Cumulative Cigarettes (15 Years)    | X        |         |         | X        |         |         |
| Lip and oral cavity cancer | Male   | Cumulative Cigarettes (20 Years)    | X        |         |         | X        |         |         |
| Lip and oral cavity cancer | Female | Cumulative Cigarettes (20 Years)    | X        |         |         | X        |         |         |
| Lip and oral cavity cancer | Male   | red meats adjusted (g)              |          | X       |         |          | X       |         |
| Lip and oral cavity cancer | Male   | Cumulative Cigarettes (5 Years)     | X        |         |         | X        |         |         |
| Lip and oral cavity cancer | Male   | Log-transformed SEV scalar: Mouth C | X        |         |         | X        |         |         |
| Liver cancer               | Male   | Alcohol (liters per capita)         | X        |         |         | X        |         |         |
| Liver cancer               | Female | Alcohol (liters per capita)         | X        |         |         | X        |         |         |
| Liver cancer               | Male   | Education (years per capita)        |          |         | X       |          |         | X       |
| Liver cancer               | Female | Education (years per capita)        |          |         | X       |          |         | X       |
| Liver cancer               | Male   | LDI (I\$ per capita)                |          |         | X       |          |         | X       |
| Liver cancer               | Female | LDI (I\$ per capita)                |          |         | X       |          |         | X       |
| Liver cancer               | Male   | Socio-demographic Index             |          |         | X       |          |         | X       |
| Liver cancer               | Female | Socio-demographic Index             |          |         | X       |          |         | X       |
| Liver cancer               | Male   | Healthcare access and quality index |          | X       |         |          | X       |         |

| Cause                   | Sex    | Covariate                                         | GBD 2016 |         |         | GBD 2017 |         |         |
|-------------------------|--------|---------------------------------------------------|----------|---------|---------|----------|---------|---------|
|                         |        |                                                   | Level 1  | Level 2 | Level 3 | Level 1  | Level 2 | Level 3 |
| Liver cancer            | Female | Healthcare access and quality index               |          | X       |         |          | X       |         |
| Liver cancer            | Male   | Mean BMI                                          |          | X       |         |          | X       |         |
| Liver cancer            | Female | Mean BMI                                          |          | X       |         |          | X       |         |
| Liver cancer            | Male   | Hepatitis B (HBsAg) Seroprevalence                | X        |         |         | X        |         |         |
| Liver cancer            | Female | Hepatitis B (HBsAg) Seroprevalence                | X        |         |         | X        |         |         |
| Liver cancer            | Male   | Hepatitis C (IgG) Seroprevalence                  | X        |         |         | X        |         |         |
| Liver cancer            | Female | Hepatitis C (IgG) Seroprevalence                  | X        |         |         | X        |         |         |
| Liver cancer            | Male   | Tobacco (cigarettes per capita)                   | X        |         |         |          | X       |         |
| Liver cancer            | Female | Tobacco (cigarettes per capita)                   | X        |         |         |          | X       |         |
| Liver cancer            | Male   | Cumulative Cigarettes (15 Years)                  | X        |         |         |          | X       |         |
| Liver cancer            | Female | Cumulative Cigarettes (15 Years)                  | X        |         |         |          | X       |         |
| Liver cancer            | Male   | Cumulative Cigarettes (20 Years)                  | X        |         |         |          | X       |         |
| Liver cancer            | Female | Cumulative Cigarettes (20 Years)                  | X        |         |         |          | X       |         |
| Liver cancer            | Male   | Diabetes Age-Standardized Prevalence (proportion) |          | X       |         |          | X       |         |
| Liver cancer            | Female | Diabetes Age-Standardized Prevalence (proportion) |          | X       |         |          | X       |         |
| Liver cancer            | Male   | Log-transformed SEV scalar: Liver C               | X        |         |         | X        |         |         |
| Liver cancer            | Female | Log-transformed SEV scalar: Liver C               | X        |         |         | X        |         |         |
| Liver cancer            | Male   | red meats adjusted (g)                            |          | X       |         |          | X       |         |
| Liver cancer            | Female | red meats adjusted (g)                            |          | X       |         |          | X       |         |
| Malignant skin melanoma | Male   | Alcohol (liters per capita)                       |          | X       |         |          | X       |         |
| Malignant skin melanoma | Male   | Alcohol (liters per capita)                       |          | X       |         | X        |         |         |
| Malignant skin melanoma | Male   | Alcohol (liters per capita)                       | X        |         |         |          | X       |         |
| Malignant skin melanoma | Male   | Alcohol (liters per capita)                       | X        |         |         | X        |         |         |
| Malignant skin melanoma | Female | Alcohol (liters per capita)                       | X        |         |         | X        |         |         |
| Malignant skin melanoma | Male   | Education (years per capita)                      |          |         | X       |          |         | X       |
| Malignant skin melanoma | Female | Education (years per capita)                      |          |         | X       |          |         | X       |
| Malignant skin melanoma | Male   | LDI (I\$ per capita)                              |          |         | X       |          |         | X       |
| Malignant skin melanoma | Female | LDI (I\$ per capita)                              |          |         | X       |          |         | X       |

| Cause                   | Sex    | Covariate                                           | GBD 2016 |         |         | GBD 2017 |         |         |
|-------------------------|--------|-----------------------------------------------------|----------|---------|---------|----------|---------|---------|
|                         |        |                                                     | Level 1  | Level 2 | Level 3 | Level 1  | Level 2 | Level 3 |
| Malignant skin melanoma | Male   | Socio-demographic Index                             |          |         | X       |          |         | X       |
| Malignant skin melanoma | Female | Socio-demographic Index                             |          |         | X       |          |         | X       |
| Malignant skin melanoma | Male   | Healthcare access and quality index                 |          | X       |         |          | X       |         |
| Malignant skin melanoma | Female | Healthcare access and quality index                 |          | X       |         |          | X       |         |
| Malignant skin melanoma | Male   | Latitude Under 15 (proportion)                      |          | X       |         |          | X       |         |
| Malignant skin melanoma | Female | Latitude Under 15 (proportion)                      |          | X       |         |          | X       |         |
| Malignant skin melanoma | Male   | Latitude 30 to 45 (proportion)                      |          | X       |         |          | X       |         |
| Malignant skin melanoma | Female | Latitude 30 to 45 (proportion)                      |          | X       |         |          | X       |         |
| Malignant skin melanoma | Male   | Latitude Over 45 (proportion)                       |          | X       |         |          | X       |         |
| Malignant skin melanoma | Female | Latitude Over 45 (proportion)                       |          | X       |         |          | X       |         |
| Malignant skin melanoma | Male   | Latitude 15 to 30 (proportion)                      |          | X       |         |          | X       |         |
| Malignant skin melanoma | Female | Latitude 15 to 30 (proportion)                      |          | X       |         |          | X       |         |
| Malignant skin melanoma | Male   | fruits adjusted (g)                                 |          | X       |         |          | X       |         |
| Malignant skin melanoma | Female | fruits adjusted (g)                                 |          | X       |         |          | X       |         |
| Malignant skin melanoma | Male   | vegetables adjusted (g)                             |          | X       |         |          | X       |         |
| Malignant skin melanoma | Female | vegetables adjusted (g)                             |          | X       |         |          | X       |         |
| Mesothelioma            | Female | Education (years per capita)                        |          |         | X       |          |         | X       |
| Mesothelioma            | Male   | Education (years per capita)                        |          |         | X       |          |         | X       |
| Mesothelioma            | Female | LDI (I\$ per capita)                                |          |         | X       |          |         | X       |
| Mesothelioma            | Male   | LDI (I\$ per capita)                                |          |         | X       |          |         | X       |
| Mesothelioma            | Female | Indoor Air Pollution (All Cooking Fuels)            | X        |         |         | X        |         |         |
| Mesothelioma            | Male   | Indoor Air Pollution (All Cooking Fuels)            | X        |         |         | X        |         |         |
| Mesothelioma            | Female | Population Density (over 1000 ppl/sqkm, proportion) |          | X       |         |          | X       |         |
| Mesothelioma            | Male   | Population Density (over 1000 ppl/sqkm, proportion) |          | X       |         |          | X       |         |
| Mesothelioma            | Female | Smoking Prevalence                                  | X        |         |         | X        |         |         |
| Mesothelioma            | Male   | Smoking Prevalence                                  | X        |         |         | X        |         |         |
| Mesothelioma            | Female | Socio-demographic Index                             |          |         | X       |          |         | X       |
| Mesothelioma            | Male   | Socio-demographic Index                             |          |         | X       |          |         | X       |

| Cause            | Sex    | Covariate                                              | GBD 2016 |         |         | GBD 2017 |         |         |
|------------------|--------|--------------------------------------------------------|----------|---------|---------|----------|---------|---------|
|                  |        |                                                        | Level 1  | Level 2 | Level 3 | Level 1  | Level 2 | Level 3 |
| Mesothelioma     | Female | Healthcare access and quality index                    |          | X       |         |          | X       |         |
| Mesothelioma     | Male   | Healthcare access and quality index                    |          | X       |         |          | X       |         |
| Mesothelioma     | Female | Cumulative Cigarettes (5 Years)                        | X        |         |         | X        |         |         |
| Mesothelioma     | Male   | Cumulative Cigarettes (5 Years)                        | X        |         |         | X        |         |         |
| Mesothelioma     | Female | Asbestos production (binary)                           | X        |         |         | X        |         |         |
| Mesothelioma     | Female | Asbestos production (kg) per capita                    |          | X       |         |          | X       |         |
| Mesothelioma     | Female | Gold production (binary)                               |          | X       |         |          | X       |         |
| Mesothelioma     | Male   | Gold production (binary)                               |          | X       |         |          | X       |         |
| Mesothelioma     | Female | Gold production (kg) per capita                        |          | X       |         |          | X       |         |
| Mesothelioma     | Male   | Gold production (kg) per capita                        |          | X       |         |          | X       |         |
| Mesothelioma     | Female | Asbestos consumption (metric tons per year per capita) | X        |         |         | X        |         |         |
| Mesothelioma     | Male   | Asbestos consumption (metric tons per year per capita) | X        |         |         | X        |         |         |
| Multiple myeloma | Male   | Alcohol (liters per capita)                            | X        |         |         | X        |         |         |
| Multiple myeloma | Female | Alcohol (liters per capita)                            | X        |         |         | X        |         |         |
| Multiple myeloma | Male   | Education (years per capita)                           |          |         | X       |          |         | X       |
| Multiple myeloma | Female | Education (years per capita)                           |          |         | X       |          |         | X       |
| Multiple myeloma | Male   | LDI (I\$ per capita)                                   |          |         | X       |          |         | X       |
| Multiple myeloma | Female | LDI (I\$ per capita)                                   |          |         | X       |          |         | X       |
| Multiple myeloma | Male   | Smoking Prevalence                                     | X        |         |         | X        |         |         |
| Multiple myeloma | Female | Smoking Prevalence                                     | X        |         |         | X        |         |         |
| Multiple myeloma | Male   | Socio-demographic Index                                |          |         | X       |          |         | X       |
| Multiple myeloma | Female | Socio-demographic Index                                |          |         | X       |          |         | X       |
| Multiple myeloma | Male   | Healthcare access and quality index                    |          | X       |         |          | X       |         |
| Multiple myeloma | Female | Healthcare access and quality index                    |          | X       |         |          | X       |         |
| Multiple myeloma | Male   | Mean BMI                                               |          | X       |         |          | X       |         |
| Multiple myeloma | Female | Mean BMI                                               |          | X       |         |          | X       |         |
| Multiple myeloma | Male   | Sanitation (proportion with access)                    |          | X       |         |          | X       |         |
| Multiple myeloma | Female | Sanitation (proportion with access)                    |          | X       |         |          | X       |         |

| Cause              | Sex    | Covariate                                           | GBD 2016 |         |         | GBD 2017 |         |         |
|--------------------|--------|-----------------------------------------------------|----------|---------|---------|----------|---------|---------|
|                    |        |                                                     | Level 1  | Level 2 | Level 3 | Level 1  | Level 2 | Level 3 |
| Multiple myeloma   | Male   | Improved Water Source (proportion with access)      |          | X       |         |          | X       |         |
| Multiple myeloma   | Female | Improved Water Source (proportion with access)      |          | X       |         |          | X       |         |
| Multiple myeloma   | Male   | Tobacco (cigarettes per capita)                     | X        |         |         | X        |         |         |
| Multiple myeloma   | Female | Tobacco (cigarettes per capita)                     | X        |         |         | X        |         |         |
| Multiple myeloma   | Male   | fruits adjusted (g)                                 |          | X       |         |          | X       |         |
| Multiple myeloma   | Female | fruits adjusted (g)                                 |          | X       |         |          | X       |         |
| Multiple myeloma   | Male   | vegetables adjusted (g)                             |          | X       |         |          | X       |         |
| Multiple myeloma   | Female | vegetables adjusted (g)                             |          | X       |         |          | X       |         |
| Multiple myeloma   | Male   | red meats adjusted (g)                              |          | X       |         |          | X       |         |
| Multiple myeloma   | Female | red meats adjusted (g)                              |          | X       |         |          | X       |         |
| Nasopharynx cancer | Female | Alcohol (liters per capita)                         | X        |         |         | X        |         |         |
| Nasopharynx cancer | Male   | Alcohol (liters per capita)                         | X        |         |         | X        |         |         |
| Nasopharynx cancer | Female | Education (years per capita)                        |          |         | X       |          |         | X       |
| Nasopharynx cancer | Male   | Education (years per capita)                        |          |         | X       |          |         | X       |
| Nasopharynx cancer | Female | LDI (I\$ per capita)                                |          |         | X       |          |         | X       |
| Nasopharynx cancer | Male   | LDI (I\$ per capita)                                |          |         | X       |          |         | X       |
| Nasopharynx cancer | Female | Population Density (over 1000 ppl/sqkm, proportion) |          | X       |         |          | X       |         |
| Nasopharynx cancer | Male   | Population Density (over 1000 ppl/sqkm, proportion) |          | X       |         |          | X       |         |
| Nasopharynx cancer | Female | Smoking Prevalence                                  | X        |         |         | X        |         |         |
| Nasopharynx cancer | Male   | Smoking Prevalence                                  | X        |         |         | X        |         |         |
| Nasopharynx cancer | Female | Socio-demographic Index                             |          |         | X       |          |         | X       |
| Nasopharynx cancer | Male   | Socio-demographic Index                             |          |         | X       |          |         | X       |
| Nasopharynx cancer | Female | Population Density (under 150 ppl/sqkm, proportion) |          | X       |         |          | X       |         |
| Nasopharynx cancer | Male   | Population Density (under 150 ppl/sqkm, proportion) |          | X       |         |          | X       |         |

| Cause                    | Sex    | Covariate                            | GBD 2016 |         |         | GBD 2017 |         |         |
|--------------------------|--------|--------------------------------------|----------|---------|---------|----------|---------|---------|
|                          |        |                                      | Level 1  | Level 2 | Level 3 | Level 1  | Level 2 | Level 3 |
| Nasopharynx cancer       | Female | Tobacco (cigarettes per capita)      | X        |         |         | X        |         |         |
| Nasopharynx cancer       | Male   | Tobacco (cigarettes per capita)      | X        |         |         | X        |         |         |
| Nasopharynx cancer       | Female | fruits adjusted (g)                  |          | X       |         |          | X       |         |
| Nasopharynx cancer       | Male   | fruits adjusted (g)                  |          | X       |         |          | X       |         |
| Nasopharynx cancer       | Female | vegetables adjusted (g)              |          | X       |         |          | X       |         |
| Nasopharynx cancer       | Male   | vegetables adjusted (g)              |          | X       |         |          | X       |         |
| Nasopharynx cancer       | Female | Cumulative Cigarettes (10 Years)     | X        |         |         | X        |         |         |
| Nasopharynx cancer       | Male   | Cumulative Cigarettes (10 Years)     | X        |         |         | X        |         |         |
| Nasopharynx cancer       | Female | Cumulative Cigarettes (15 Years)     | X        |         |         | X        |         |         |
| Nasopharynx cancer       | Male   | Cumulative Cigarettes (15 Years)     | X        |         |         | X        |         |         |
| Nasopharynx cancer       | Female | Cumulative Cigarettes (20 Years)     | X        |         |         | X        |         |         |
| Nasopharynx cancer       | Male   | Cumulative Cigarettes (20 Years)     | X        |         |         | X        |         |         |
| Nasopharynx cancer       | Female | Cumulative Cigarettes (5 Years)      | X        |         |         | X        |         |         |
| Nasopharynx cancer       | Male   | Cumulative Cigarettes (5 Years)      | X        |         |         | X        |         |         |
| Nasopharynx cancer       | Female | Log-transformed SEV scalar: Nasoph C | X        |         |         | X        |         |         |
| Nasopharynx cancer       | Male   | Log-transformed SEV scalar: Nasoph C | X        |         |         | X        |         |         |
| Non-Hodgkin lymphoma     | Male   | Alcohol (liters per capita)          |          | X       |         |          | X       |         |
| Non-Hodgkin lymphoma     | Female | Alcohol (liters per capita)          |          | X       |         |          | X       |         |
| Non-Hodgkin lymphoma     | Male   | LDI (I\$ per capita)                 |          |         | X       |          |         | X       |
| Non-Hodgkin lymphoma     | Female | LDI (I\$ per capita)                 |          |         | X       |          |         | X       |
| Non-Hodgkin lymphoma     | Male   | Smoking Prevalence                   |          | X       |         |          | X       |         |
| Non-Hodgkin lymphoma     | Female | Smoking Prevalence                   |          | X       |         |          | X       |         |
| Non-Hodgkin lymphoma     | Male   | Socio-demographic Index              |          |         | X       |          |         | X       |
| Non-Hodgkin lymphoma     | Female | Socio-demographic Index              |          |         | X       |          |         | X       |
| Non-Hodgkin lymphoma     | Male   | Healthcare access and quality index  |          | X       |         |          | X       |         |
| Non-Hodgkin lymphoma     | Female | Healthcare access and quality index  |          | X       |         |          | X       |         |
| Non-Hodgkin lymphoma     | Female | Total Fertility Rate                 |          |         | X       |          |         | X       |
| Non-Hodgkin lymphoma     | Male   | Cumulative Cigarettes (10 Years)     |          | X       |         |          | X       |         |
| Non-Hodgkin lymphoma     | Female | Cumulative Cigarettes (10 Years)     |          | X       |         |          | X       |         |
| Non-melanoma skin cancer | Male   | Education (years per capita)         |          |         | X       |          |         | X       |



| Cause                                              | Sex    | Covariate                           | GBD 2016 |         |         | GBD 2017 |         |         |
|----------------------------------------------------|--------|-------------------------------------|----------|---------|---------|----------|---------|---------|
|                                                    |        |                                     | Level 1  | Level 2 | Level 3 | Level 1  | Level 2 | Level 3 |
| Non-melanoma skin cancer                           | Female | Education (years per capita)        |          |         | X       |          |         | X       |
| Non-melanoma skin cancer                           | Male   | LDI (I\$ per capita)                |          |         | X       |          |         | X       |
| Non-melanoma skin cancer                           | Female | LDI (I\$ per capita)                |          |         | X       |          |         | X       |
| Non-melanoma skin cancer                           | Male   | Smoking Prevalence                  | X        |         |         | X        |         |         |
| Non-melanoma skin cancer                           | Female | Smoking Prevalence                  | X        |         |         | X        |         |         |
| Non-melanoma skin cancer                           | Male   | Socio-demographic Index             |          |         | X       |          |         | X       |
| Non-melanoma skin cancer                           | Female | Socio-demographic Index             |          |         | X       |          |         | X       |
| Non-melanoma skin cancer                           | Male   | Healthcare access and quality index |          | X       |         |          | X       |         |
| Non-melanoma skin cancer                           | Female | Healthcare access and quality index |          | X       |         |          | X       |         |
| Non-melanoma skin cancer                           | Male   | Cumulative Cigarettes (10 Years)    | X        |         |         | X        |         |         |
| Non-melanoma skin cancer                           | Female | Cumulative Cigarettes (10 Years)    | X        |         |         | X        |         |         |
| Non-melanoma skin cancer                           | Male   | Cumulative Cigarettes (15 Years)    | X        |         |         | X        |         |         |
| Non-melanoma skin cancer                           | Female | Cumulative Cigarettes (15 Years)    | X        |         |         | X        |         |         |
| Non-melanoma skin cancer                           | Male   | Cumulative Cigarettes (5 Years)     | X        |         |         | X        |         |         |
| Non-melanoma skin cancer                           | Female | Cumulative Cigarettes (5 Years)     | X        |         |         | X        |         |         |
| Non-melanoma skin cancer                           | Male   | Average latitude                    |          | X       |         |          | X       |         |
| Non-melanoma skin cancer                           | Female | Average latitude                    |          | X       |         |          | X       |         |
| Non-melanoma skin cancer (squamous-cell carcinoma) | Male   | Education (years per capita)        |          |         | X       |          |         | X       |
| Non-melanoma skin cancer (squamous-cell carcinoma) | Female | Education (years per capita)        |          |         | X       |          |         | X       |
| Non-melanoma skin cancer (squamous-cell carcinoma) | Male   | LDI (I\$ per capita)                |          |         | X       |          |         | X       |
| Non-melanoma skin cancer (squamous-cell carcinoma) | Female | LDI (I\$ per capita)                |          |         | X       |          |         | X       |
| Non-melanoma skin cancer (squamous-cell carcinoma) | Male   | Smoking Prevalence                  | X        |         |         | X        |         |         |
| Non-melanoma skin cancer (squamous-cell carcinoma) | Female | Smoking Prevalence                  | X        |         |         | X        |         |         |

| Cause                                              | Sex    | Covariate                           | GBD 2016 |         |         | GBD 2017 |         |         |
|----------------------------------------------------|--------|-------------------------------------|----------|---------|---------|----------|---------|---------|
|                                                    |        |                                     | Level 1  | Level 2 | Level 3 | Level 1  | Level 2 | Level 3 |
| Non-melanoma skin cancer (squamous-cell carcinoma) | Male   | Socio-demographic Index             |          |         | X       |          |         | X       |
| Non-melanoma skin cancer (squamous-cell carcinoma) | Female | Socio-demographic Index             |          |         | X       |          |         | X       |
| Non-melanoma skin cancer (squamous-cell carcinoma) | Male   | Healthcare access and quality index |          | X       |         |          | X       |         |
| Non-melanoma skin cancer (squamous-cell carcinoma) | Female | Healthcare access and quality index |          | X       |         |          | X       |         |
| Non-melanoma skin cancer (squamous-cell carcinoma) | Male   | Cumulative Cigarettes (10 Years)    | X        |         |         | X        |         |         |
| Non-melanoma skin cancer (squamous-cell carcinoma) | Female | Cumulative Cigarettes (10 Years)    | X        |         |         | X        |         |         |
| Non-melanoma skin cancer (squamous-cell carcinoma) | Male   | Cumulative Cigarettes (15 Years)    | X        |         |         | X        |         |         |
| Non-melanoma skin cancer (squamous-cell carcinoma) | Female | Cumulative Cigarettes (15 Years)    | X        |         |         | X        |         |         |
| Non-melanoma skin cancer (squamous-cell carcinoma) | Male   | Cumulative Cigarettes (5 Years)     | X        |         |         | X        |         |         |
| Non-melanoma skin cancer (squamous-cell carcinoma) | Female | Cumulative Cigarettes (5 Years)     | X        |         |         | X        |         |         |
| Non-melanoma skin cancer (squamous-cell carcinoma) | Male   | Average latitude                    |          | X       |         |          | X       |         |
| Non-melanoma skin cancer (squamous-cell carcinoma) | Female | Average latitude                    |          | X       |         |          | X       |         |
| Other leukemia                                     | Female | Alcohol (liters per capita)         |          | X       |         |          | X       |         |
| Other leukemia                                     | Male   | Alcohol (liters per capita)         |          | X       |         |          | X       |         |
| Other leukemia                                     | Female | Education (years per capita)        |          |         | X       |          |         | X       |
| Other leukemia                                     | Male   | Education (years per capita)        |          |         | X       |          |         | X       |
| Other leukemia                                     | Female | LDI (I\$ per capita)                |          |         | X       |          |         | X       |
| Other leukemia                                     | Male   | LDI (I\$ per capita)                |          |         | X       |          |         | X       |
| Other leukemia                                     | Female | Smoking Prevalence                  |          | X       |         |          | X       |         |

| Cause                | Sex    | Covariate                                           | GBD 2016 |         |         | GBD 2017 |         |         |
|----------------------|--------|-----------------------------------------------------|----------|---------|---------|----------|---------|---------|
|                      |        |                                                     | Level 1  | Level 2 | Level 3 | Level 1  | Level 2 | Level 3 |
| Other leukemia       | Male   | Smoking Prevalence                                  |          | X       |         |          | X       |         |
| Other leukemia       | Female | Socio-demographic Index                             |          |         | X       |          |         | X       |
| Other leukemia       | Male   | Socio-demographic Index                             |          |         | X       |          |         | X       |
| Other leukemia       | Female | Tobacco (cigarettes per capita)                     |          | X       |         |          | X       |         |
| Other leukemia       | Male   | Tobacco (cigarettes per capita)                     |          | X       |         |          | X       |         |
| Other leukemia       | Female | Cumulative Cigarettes (10 Years)                    |          | X       |         |          | X       |         |
| Other leukemia       | Male   | Cumulative Cigarettes (10 Years)                    |          | X       |         |          | X       |         |
| Other leukemia       | Female | Cumulative Cigarettes (15 Years)                    |          | X       |         |          | X       |         |
| Other leukemia       | Male   | Cumulative Cigarettes (15 Years)                    |          | X       |         |          | X       |         |
| Other leukemia       | Female | Cumulative Cigarettes (20 Years)                    |          | X       |         |          | X       |         |
| Other leukemia       | Male   | Cumulative Cigarettes (20 Years)                    |          | X       |         |          | X       |         |
| Other leukemia       | Female | Cumulative Cigarettes (5 Years)                     |          | X       |         |          | X       |         |
| Other leukemia       | Male   | Cumulative Cigarettes (5 Years)                     |          | X       |         |          | X       |         |
| Other leukemia       | Female | Log-transformed SEV scalar: Leukemia                | X        |         |         | X        |         |         |
| Other leukemia       | Male   | Log-transformed SEV scalar: Leukemia                | X        |         |         | X        |         |         |
| Other pharynx cancer | Male   | Alcohol (liters per capita)                         | X        |         |         | X        |         |         |
| Other pharynx cancer | Female | Alcohol (liters per capita)                         | X        |         |         | X        |         |         |
| Other pharynx cancer | Male   | Education (years per capita)                        |          |         | X       |          |         | X       |
| Other pharynx cancer | Female | Education (years per capita)                        |          |         | X       |          |         | X       |
| Other pharynx cancer | Male   | LDI (I\$ per capita)                                |          |         | X       |          |         | X       |
| Other pharynx cancer | Female | LDI (I\$ per capita)                                |          |         | X       |          |         | X       |
| Other pharynx cancer | Male   | Population Density (over 1000 ppl/sqkm, proportion) |          | X       |         |          | X       |         |
| Other pharynx cancer | Female | Population Density (over 1000 ppl/sqkm, proportion) |          | X       |         |          | X       |         |
| Other pharynx cancer | Male   | Smoking Prevalence                                  | X        |         |         | X        |         |         |
| Other pharynx cancer | Female | Smoking Prevalence                                  | X        |         |         | X        |         |         |
| Other pharynx cancer | Male   | Socio-demographic Index                             |          |         | X       |          |         | X       |
| Other pharynx cancer | Female | Socio-demographic Index                             |          |         | X       |          |         | X       |

| Cause                | Sex    | Covariate                                           | GBD 2016 |         |         | GBD 2017 |         |         |
|----------------------|--------|-----------------------------------------------------|----------|---------|---------|----------|---------|---------|
|                      |        |                                                     | Level 1  | Level 2 | Level 3 | Level 1  | Level 2 | Level 3 |
| Other pharynx cancer | Male   | Population Density (under 150 ppl/sqkm, proportion) |          | X       |         |          | X       |         |
| Other pharynx cancer | Female | Population Density (under 150 ppl/sqkm, proportion) |          | X       |         |          | X       |         |
| Other pharynx cancer | Male   | fruits adjusted (g)                                 |          | X       |         |          | X       |         |
| Other pharynx cancer | Female | fruits adjusted (g)                                 |          | X       |         |          | X       |         |
| Other pharynx cancer | Male   | vegetables adjusted (g)                             |          | X       |         |          | X       |         |
| Other pharynx cancer | Female | vegetables adjusted (g)                             |          | X       |         |          | X       |         |
| Other pharynx cancer | Male   | Cumulative Cigarettes (5 Years)                     |          | X       |         |          | X       |         |
| Other pharynx cancer | Female | Cumulative Cigarettes (5 Years)                     |          | X       |         |          | X       |         |
| Other pharynx cancer | Male   | Log-transformed SEV scalar: Oth Phar C              | X        |         |         | X        |         |         |
| Other pharynx cancer | Female | Log-transformed SEV scalar: Oth Phar C              | X        |         |         | X        |         |         |
| Ovarian cancer       | Female | Alcohol (liters per capita)                         | X        |         |         | X        |         |         |
| Ovarian cancer       | Female | Education (years per capita)                        |          |         | X       |          |         | X       |
| Ovarian cancer       | Female | LDI (I\$ per capita)                                |          |         | X       |          |         | X       |
| Ovarian cancer       | Female | Smoking Prevalence                                  |          | X       |         |          | X       |         |
| Ovarian cancer       | Female | Socio-demographic Index                             |          |         | X       |          |         | X       |
| Ovarian cancer       | Female | Healthcare access and quality index                 |          | X       |         |          | X       |         |
| Ovarian cancer       | Female | Mean BMI                                            |          | X       |         |          | X       |         |
| Ovarian cancer       | Female | Total Fertility Rate                                |          | X       |         |          | X       |         |
| Ovarian cancer       | Female | energy unadjusted(kcal)                             |          | X       |         |          | X       |         |
| Ovarian cancer       | Female | Tobacco (cigarettes per capita)                     | X        |         |         | X        |         |         |
| Ovarian cancer       | Female | fruits adjusted (g)                                 |          | X       |         |          | X       |         |
| Ovarian cancer       | Female | vegetables adjusted (g)                             |          | X       |         |          | X       |         |
| Ovarian cancer       | Female | Cumulative Cigarettes (20 Years)                    | X        |         |         | X        |         |         |
| Ovarian cancer       | Female | Diabetes Age-Standardized Prevalence (proportion)   |          | X       |         |          | X       |         |
| Ovarian cancer       | Female | Contraception (Modern) Prevalence (proportion)      | X        |         |         | X        |         |         |
| Ovarian cancer       | Female | Log-transformed SEV scalar: Ovary C                 | X        |         |         | X        |         |         |

| Cause             | Sex    | Covariate                                         | GBD 2016 |         |         | GBD 2017 |         |         |
|-------------------|--------|---------------------------------------------------|----------|---------|---------|----------|---------|---------|
|                   |        |                                                   | Level 1  | Level 2 | Level 3 | Level 1  | Level 2 | Level 3 |
| Pancreatic cancer | Male   | Alcohol (liters per capita)                       | X        |         |         | X        |         |         |
| Pancreatic cancer | Female | Alcohol (liters per capita)                       |          | X       |         | X        |         |         |
| Pancreatic cancer | Male   | Education (years per capita)                      |          |         | X       |          |         | X       |
| Pancreatic cancer | Female | Education (years per capita)                      |          |         | X       |          |         | X       |
| Pancreatic cancer | Male   | LDI (I\$ per capita)                              |          |         | X       |          |         | X       |
| Pancreatic cancer | Female | LDI (I\$ per capita)                              |          |         | X       |          |         | X       |
| Pancreatic cancer | Male   | Smoking Prevalence                                | X        |         |         | X        |         |         |
| Pancreatic cancer | Female | Smoking Prevalence                                | X        |         |         | X        |         |         |
| Pancreatic cancer | Male   | Socio-demographic Index                           |          |         | X       |          |         | X       |
| Pancreatic cancer | Female | Socio-demographic Index                           |          |         | X       |          |         | X       |
| Pancreatic cancer | Male   | Healthcare access and quality index               |          | X       |         |          | X       |         |
| Pancreatic cancer | Female | Healthcare access and quality index               |          | X       |         |          | X       |         |
| Pancreatic cancer | Male   | Mean BMI                                          | X        |         |         | X        |         |         |
| Pancreatic cancer | Female | Mean BMI                                          | X        |         |         | X        |         |         |
| Pancreatic cancer | Female | energy unadjusted(kcal)                           |          | X       |         |          | X       |         |
| Pancreatic cancer | Male   | energy unadjusted(kcal)                           |          | X       |         |          | X       |         |
| Pancreatic cancer | Male   | Tobacco (cigarettes per capita)                   | X        |         |         | X        |         |         |
| Pancreatic cancer | Female | Tobacco (cigarettes per capita)                   | X        |         |         | X        |         |         |
| Pancreatic cancer | Male   | fruits adjusted (g)                               |          | X       |         |          | X       |         |
| Pancreatic cancer | Female | fruits adjusted (g)                               |          | X       |         |          | X       |         |
| Pancreatic cancer | Male   | vegetables adjusted (g)                           |          | X       |         |          | X       |         |
| Pancreatic cancer | Female | vegetables adjusted (g)                           |          | X       |         |          | X       |         |
| Pancreatic cancer | Female | vegetables adjusted (g)                           | X        |         |         |          | X       |         |
| Pancreatic cancer | Male   | Cumulative Cigarettes (10 Years)                  | X        |         |         | X        |         |         |
| Pancreatic cancer | Female | Cumulative Cigarettes (10 Years)                  | X        |         |         | X        |         |         |
| Pancreatic cancer | Male   | Cumulative Cigarettes (20 Years)                  | X        |         |         | X        |         |         |
| Pancreatic cancer | Female | Cumulative Cigarettes (20 Years)                  | X        |         |         | X        |         |         |
| Pancreatic cancer | Male   | Diabetes Age-Standardized Prevalence (proportion) |          | X       |         |          | X       |         |

| Cause             | Sex    | Covariate                                         | GBD 2016 |         |         | GBD 2017 |         |         |
|-------------------|--------|---------------------------------------------------|----------|---------|---------|----------|---------|---------|
|                   |        |                                                   | Level 1  | Level 2 | Level 3 | Level 1  | Level 2 | Level 3 |
| Pancreatic cancer | Female | Diabetes Age-Standardized Prevalence (proportion) |          | X       |         |          | X       |         |
| Pancreatic cancer | Male   | red meats adjusted (g)                            |          | X       |         |          | X       |         |
| Pancreatic cancer | Female | red meats adjusted (g)                            |          | X       |         |          | X       |         |
| Pancreatic cancer | Male   | Cumulative Cigarettes (5 Years)                   |          | X       |         | X        |         |         |
| Pancreatic cancer | Female | Cumulative Cigarettes (5 Years)                   | X        |         |         | X        |         |         |
| Pancreatic cancer | Male   | Log-transformed SEV scalar: Pancreas C            | X        |         |         | X        |         |         |
| Pancreatic cancer | Female | Log-transformed SEV scalar: Pancreas C            | X        |         |         | X        |         |         |
| Prostate cancer   | Male   | Education (years per capita)                      |          |         | X       |          |         | X       |
| Prostate cancer   | Male   | LDI (I\$ per capita)                              |          |         | X       |          |         | X       |
| Prostate cancer   | Male   | Socio-demographic Index                           |          |         | X       |          |         | X       |
| Prostate cancer   | Male   | Healthcare access and quality index               |          | X       |         |          | X       |         |
| Prostate cancer   | Male   | Log-transformed SEV scalar: Prostate C            | X        |         |         | X        |         |         |
| Stomach cancer    | Female | Education (years per capita)                      |          |         | X       |          |         | X       |
| Stomach cancer    | Male   | LDI (I\$ per capita)                              |          |         | X       |          |         | X       |
| Stomach cancer    | Female | LDI (I\$ per capita)                              |          |         | X       |          |         | X       |
| Stomach cancer    | Male   | Smoking Prevalence                                | X        |         |         | X        |         |         |
| Stomach cancer    | Female | Smoking Prevalence                                | X        |         |         | X        |         |         |
| Stomach cancer    | Male   | Socio-demographic Index                           |          |         | X       |          |         | X       |
| Stomach cancer    | Female | Socio-demographic Index                           |          |         | X       |          |         | X       |
| Stomach cancer    | Male   | Healthcare access and quality index               |          | X       |         |          | X       |         |
| Stomach cancer    | Female | Healthcare access and quality index               |          | X       |         |          | X       |         |
| Stomach cancer    | Male   | Mean BMI                                          |          | X       |         |          | X       |         |
| Stomach cancer    | Female | Mean BMI                                          |          | X       |         |          | X       |         |
| Stomach cancer    | Male   | Sanitation (proportion with access)               |          | X       |         |          | X       |         |
| Stomach cancer    | Female | Sanitation (proportion with access)               |          | X       |         |          | X       |         |
| Stomach cancer    | Male   | Improved Water Source (proportion with access)    |          | X       |         |          | X       |         |
| Stomach cancer    | Female | Improved Water Source (proportion with access)    |          | X       |         |          | X       |         |

| Cause             | Sex    | Covariate                             | GBD 2016 |         |         | GBD 2017 |         |         |
|-------------------|--------|---------------------------------------|----------|---------|---------|----------|---------|---------|
|                   |        |                                       | Level 1  | Level 2 | Level 3 | Level 1  | Level 2 | Level 3 |
| Stomach cancer    | Male   | Tobacco (cigarettes per capita)       | X        |         |         | X        |         |         |
| Stomach cancer    | Female | Tobacco (cigarettes per capita)       | X        |         |         | X        |         |         |
| Stomach cancer    | Male   | fruits adjusted (g)                   |          | X       |         |          | X       |         |
| Stomach cancer    | Female | fruits adjusted (g)                   |          | X       |         |          | X       |         |
| Stomach cancer    | Male   | vegetables adjusted (g)               |          | X       |         |          | X       |         |
| Stomach cancer    | Female | vegetables adjusted (g)               |          | X       |         |          | X       |         |
| Stomach cancer    | Male   | Cumulative Cigarettes (10 Years)      | X        |         |         | X        |         |         |
| Stomach cancer    | Female | Cumulative Cigarettes (10 Years)      | X        |         |         | X        |         |         |
| Stomach cancer    | Male   | Cumulative Cigarettes (15 Years)      | X        |         |         | X        |         |         |
| Stomach cancer    | Male   | Log-transformed SEV scalar: Stomach C | X        |         |         | X        |         |         |
| Stomach cancer    | Female | Log-transformed SEV scalar: Stomach C | X        |         |         | X        |         |         |
| Stomach cancer    | Male   | Diet high in sodium                   | X        |         |         | X        |         |         |
| Stomach cancer    | Female | Diet high in sodium                   | X        |         |         | X        |         |         |
| Testicular cancer | Male   | Education (years per capita)          |          |         | X       |          |         | X       |
| Testicular cancer | Male   | LDI (I\$ per capita)                  |          |         | X       |          |         | X       |
| Testicular cancer | Male   | Socio-demographic Index               |          |         | X       |          |         | X       |
| Testicular cancer | Male   | Healthcare access and quality index   |          | X       |         |          | X       |         |
| Testicular cancer | Male   | Cumulative Cigarettes (10 Years)      |          | X       |         |          | X       |         |
| Testicular cancer | Male   | Cumulative Cigarettes (15 Years)      |          | X       |         |          | X       |         |
| Testicular cancer | Male   | Cumulative Cigarettes (5 Years)       |          | X       |         |          | X       |         |
| Thyroid cancer    | Female | Alcohol (liters per capita)           | X        |         |         | X        |         |         |
| Thyroid cancer    | Male   | Alcohol (liters per capita)           | X        |         |         | X        |         |         |
| Thyroid cancer    | Female | Education (years per capita)          |          |         | X       |          |         | X       |
| Thyroid cancer    | Male   | Education (years per capita)          |          |         | X       |          |         | X       |
| Thyroid cancer    | Female | LDI (I\$ per capita)                  |          |         | X       |          |         | X       |
| Thyroid cancer    | Male   | LDI (I\$ per capita)                  |          |         | X       |          |         | X       |
| Thyroid cancer    | Female | Smoking Prevalence                    |          | X       |         |          | X       |         |
| Thyroid cancer    | Male   | Smoking Prevalence                    |          | X       |         | X        |         |         |
| Thyroid cancer    | Male   | Smoking Prevalence                    |          | X       |         |          | X       |         |
| Thyroid cancer    | Male   | Smoking Prevalence                    | X        |         |         | X        |         |         |

| Cause                               | Sex    | Covariate                                      | GBD 2016 |         |         | GBD 2017 |         |         |
|-------------------------------------|--------|------------------------------------------------|----------|---------|---------|----------|---------|---------|
|                                     |        |                                                | Level 1  | Level 2 | Level 3 | Level 1  | Level 2 | Level 3 |
| Thyroid cancer                      | Male   | Smoking Prevalence                             | X        |         |         |          | X       |         |
| Thyroid cancer                      | Female | Socio-demographic Index                        |          |         | X       |          |         | X       |
| Thyroid cancer                      | Male   | Socio-demographic Index                        |          |         | X       |          |         | X       |
| Thyroid cancer                      | Female | Healthcare access and quality index            |          | X       |         |          | X       |         |
| Thyroid cancer                      | Male   | Healthcare access and quality index            |          | X       |         |          | X       |         |
| Thyroid cancer                      | Female | Mean BMI                                       |          | X       |         |          | X       |         |
| Thyroid cancer                      | Male   | Mean BMI                                       |          | X       |         |          | X       |         |
| Thyroid cancer                      | Female | Sanitation (proportion with access)            |          | X       |         |          | X       |         |
| Thyroid cancer                      | Male   | Sanitation (proportion with access)            |          | X       |         |          | X       |         |
| Thyroid cancer                      | Female | Improved Water Source (proportion with access) |          | X       |         |          | X       |         |
| Thyroid cancer                      | Male   | Improved Water Source (proportion with access) |          | X       |         |          | X       |         |
| Thyroid cancer                      | Female | Tobacco (cigarettes per capita)                |          | X       |         |          | X       |         |
| Thyroid cancer                      | Male   | Tobacco (cigarettes per capita)                |          | X       |         |          | X       |         |
| Thyroid cancer                      | Female | fruits adjusted (g)                            |          | X       |         |          | X       |         |
| Thyroid cancer                      | Male   | fruits adjusted (g)                            |          | X       |         |          | X       |         |
| Thyroid cancer                      | Female | vegetables adjusted (g)                        |          | X       |         |          | X       |         |
| Thyroid cancer                      | Male   | vegetables adjusted (g)                        |          | X       |         |          | X       |         |
| Thyroid cancer                      | Female | red meats adjusted (g)                         |          | X       |         |          | X       |         |
| Thyroid cancer                      | Male   | red meats adjusted (g)                         |          | X       |         |          | X       |         |
| Thyroid cancer                      | Female | Log-transformed SEV scalar: Thyroid C          | X        |         |         | X        |         |         |
| Thyroid cancer                      | Male   | Log-transformed SEV scalar: Thyroid C          | X        |         |         | X        |         |         |
| Tracheal, bronchus, and lung cancer | Female | Education (years per capita)                   |          |         | X       |          |         | X       |
| Tracheal, bronchus, and lung cancer | Male   | Education (years per capita)                   |          |         | X       |          |         | X       |
| Tracheal, bronchus, and lung cancer | Female | LDI (I\$ per capita)                           |          |         | X       |          |         | X       |
| Tracheal, bronchus, and lung cancer | Male   | LDI (I\$ per capita)                           |          |         | X       |          |         | X       |
| Tracheal, bronchus, and lung cancer | Female | Indoor Air Pollution (All Cooking Fuels)       |          | X       |         |          | X       |         |
| Tracheal, bronchus, and lung cancer | Male   | Indoor Air Pollution (All Cooking Fuels)       |          | X       |         |          | X       |         |
| Tracheal, bronchus, and lung cancer | Female | Outdoor Air Pollution (PM2.5)                  |          | X       |         |          | X       |         |



| Cause                               | Sex    | Covariate                                           | GBD 2016 |         |         | GBD 2017 |         |         |
|-------------------------------------|--------|-----------------------------------------------------|----------|---------|---------|----------|---------|---------|
|                                     |        |                                                     | Level 1  | Level 2 | Level 3 | Level 1  | Level 2 | Level 3 |
| Tracheal, bronchus, and lung cancer | Male   | Outdoor Air Pollution (PM2.5)                       |          | X       |         |          | X       |         |
| Tracheal, bronchus, and lung cancer | Female | Smoking Prevalence                                  | X        |         |         | X        |         |         |
| Tracheal, bronchus, and lung cancer | Male   | Smoking Prevalence                                  | X        |         |         | X        |         |         |
| Tracheal, bronchus, and lung cancer | Female | Socio-demographic Index                             |          |         | X       |          |         | X       |
| Tracheal, bronchus, and lung cancer | Male   | Socio-demographic Index                             |          |         | X       |          |         | X       |
| Tracheal, bronchus, and lung cancer | Female | Healthcare access and quality index                 |          | X       |         |          | X       |         |
| Tracheal, bronchus, and lung cancer | Male   | Healthcare access and quality index                 |          | X       |         |          | X       |         |
| Tracheal, bronchus, and lung cancer | Female | Tobacco (cigarettes per capita)                     | X        |         |         | X        |         |         |
| Tracheal, bronchus, and lung cancer | Male   | Tobacco (cigarettes per capita)                     | X        |         |         | X        |         |         |
| Tracheal, bronchus, and lung cancer | Female | Cumulative Cigarettes (10 Years)                    | X        |         |         | X        |         |         |
| Tracheal, bronchus, and lung cancer | Male   | Cumulative Cigarettes (10 Years)                    | X        |         |         | X        |         |         |
| Tracheal, bronchus, and lung cancer | Female | Cumulative Cigarettes (15 Years)                    | X        |         |         | X        |         |         |
| Tracheal, bronchus, and lung cancer | Male   | Cumulative Cigarettes (15 Years)                    | X        |         |         | X        |         |         |
| Tracheal, bronchus, and lung cancer | Female | Cumulative Cigarettes (20 Years)                    | X        |         |         | X        |         |         |
| Tracheal, bronchus, and lung cancer | Male   | Cumulative Cigarettes (20 Years)                    | X        |         |         | X        |         |         |
| Tracheal, bronchus, and lung cancer | Female | Cumulative Cigarettes (5 Years)                     | X        |         |         | X        |         |         |
| Tracheal, bronchus, and lung cancer | Male   | Cumulative Cigarettes (5 Years)                     | X        |         |         | X        |         |         |
| Tracheal, bronchus, and lung cancer | Female | Log-transformed SEV scalar: Lung C                  | X        |         |         | X        |         |         |
| Tracheal, bronchus, and lung cancer | Male   | Log-transformed SEV scalar: Lung C                  | X        |         |         | X        |         |         |
| Tracheal, bronchus, and lung cancer | Female | Log-transformed age-standardized SEV scalar: Lung C | X        |         |         | X        |         |         |
| Tracheal, bronchus, and lung cancer | Male   | Log-transformed age-standardized SEV scalar: Lung C | X        |         |         | X        |         |         |
| Uterine cancer                      | Female | Education (years per capita)                        |          |         | X       |          |         | X       |
| Uterine cancer                      | Female | LDI (I\$ per capita)                                |          |         | X       |          |         | X       |
| Uterine cancer                      | Female | Smoking Prevalence                                  |          | X       |         |          | X       |         |
| Uterine cancer                      | Female | Socio-demographic Index                             |          |         | X       |          |         | X       |
| Uterine cancer                      | Female | Healthcare access and quality index                 |          | X       |         |          | X       |         |
| Uterine cancer                      | Female | Mean BMI                                            | X        |         |         | X        |         |         |
| Uterine cancer                      | Female | Total Fertility Rate                                |          | X       |         |          | X       |         |

| Cause          | Sex    | Covariate                                         | GBD 2016 |         |         | GBD 2017 |         |         |
|----------------|--------|---------------------------------------------------|----------|---------|---------|----------|---------|---------|
|                |        |                                                   | Level 1  | Level 2 | Level 3 | Level 1  | Level 2 | Level 3 |
| Uterine cancer | Female | Tobacco (cigarettes per capita)                   |          | X       |         |          | X       |         |
| Uterine cancer | Female | fruits adjusted (g)                               |          | X       |         |          | X       |         |
| Uterine cancer | Female | vegetables adjusted (g)                           |          | X       |         |          | X       |         |
| Uterine cancer | Female | Cumulative Cigarettes (10 Years)                  |          | X       |         |          | X       |         |
| Uterine cancer | Female | Diabetes Age-Standardized Prevalence (proportion) |          | X       |         |          | X       |         |
| Uterine cancer | Female | Cumulative Cigarettes (5 Years)                   |          | X       |         |          | X       |         |
| Uterine cancer | Female | Log-transformed SEV scalar: Uterus C              | X        |         |         | X        |         |         |

*eTable 10: Results for CODEm model testing*

| Cause                         | Sex    | Age start   | Age end   | RMSE in  | RMSE out | Trend in | Trend out | Coverage in | Coverage out |
|-------------------------------|--------|-------------|-----------|----------|----------|----------|-----------|-------------|--------------|
| Esophageal cancer [Global]    | Male   | 15-19 years | 95+ years | 0.271316 | 0.427854 | 0.205445 | 0.199855  | 0.997669    | 0.981185     |
| Esophageal cancer [Global]    | Female | 15-19 years | 95+ years | 0.302361 | 0.493874 | 0.2317   | 0.224894  | 0.995681    | 0.980883     |
| Esophageal cancer [Data Rich] | Male   | 15-19 years | 95+ years | 0.239895 | 0.300276 | 0.187005 | 0.203166  | 0.998625    | 0.997254     |
| Esophageal cancer [Data Rich] | Female | 15-19 years | 95+ years | 0.262599 | 0.334148 | 0.207727 | 0.236855  | 0.996943    | 0.996228     |
| Stomach cancer [Global]       | Female | 15-19 years | 95+ years | 0.197066 | 0.311293 | 0.153993 | 0.158753  | 0.999106    | 0.986096     |
| Stomach cancer [Data Rich]    | Female | 15-19 years | 95+ years | 0.171356 | 0.213965 | 0.13582  | 0.148335  | 0.99938     | 0.998545     |
| Stomach cancer [Global]       | Male   | 15-19 years | 95+ years | 0.203033 | 0.305319 | 0.158061 | 0.159925  | 0.99871     | 0.985866     |
| Stomach cancer [Data Rich]    | Male   | 15-19 years | 95+ years | 0.179392 | 0.221151 | 0.141635 | 0.151978  | 0.998922    | 0.997836     |
| Liver cancer [Global]         | Male   | 5-9 years   | 95+ years | 0.267389 | 0.412643 | 0.209002 | 0.20667   | 0.998935    | 0.990285     |

| Cause                                           | Sex    | Age start   | Age end   | RMSE in  | RMSE out | Trend in | Trend out | Coverage in | Coverage out |
|-------------------------------------------------|--------|-------------|-----------|----------|----------|----------|-----------|-------------|--------------|
| Liver cancer [Data Rich]                        | Male   | 5-9 years   | 95+ years | 0.229806 | 0.299408 | 0.188299 | 0.214908  | 0.999276    | 0.998608     |
| Liver cancer [Global]                           | Female | 5-9 years   | 95+ years | 0.272486 | 0.405092 | 0.210121 | 0.213135  | 0.998713    | 0.99157      |
| Liver cancer [Data Rich]                        | Female | 5-9 years   | 95+ years | 0.231145 | 0.303877 | 0.189712 | 0.213305  | 0.999019    | 0.998295     |
| Larynx cancer [Global]                          | Male   | 15-19 years | 95+ years | 0.25327  | 0.37169  | 0.204343 | 0.206604  | 0.997733    | 0.990714     |
| Larynx cancer [Global]                          | Female | 15-19 years | 95+ years | 0.332425 | 0.529369 | 0.272032 | 0.272355  | 0.982841    | 0.977421     |
| Larynx cancer [Data Rich]                       | Male   | 15-19 years | 95+ years | 0.213815 | 0.260863 | 0.172458 | 0.181282  | 0.99722     | 0.99693      |
| Larynx cancer [Data Rich]                       | Female | 15-19 years | 95+ years | 0.290319 | 0.365907 | 0.245204 | 0.279464  | 0.979378    | 0.980174     |
| Tracheal, bronchus, and lung cancer [Data Rich] | Female | 15-19 years | 95+ years | 0.241549 | 0.305833 | 0.19181  | 0.212529  | 0.997935    | 0.995941     |
| Tracheal, bronchus, and lung cancer [Global]    | Male   | 15-19 years | 95+ years | 0.241892 | 0.362338 | 0.188073 | 0.183458  | 0.998705    | 0.981847     |
| Tracheal, bronchus, and lung cancer [Global]    | Female | 15-19 years | 95+ years | 0.266197 | 0.399225 | 0.20529  | 0.205262  | 0.997793    | 0.983526     |
| Tracheal, bronchus, and lung cancer [Data Rich] | Male   | 15-19 years | 95+ years | 0.208587 | 0.259273 | 0.166474 | 0.182672  | 0.998632    | 0.997141     |
| Breast cancer [Global]                          | Male   | 15-19 years | 95+ years | 0.422337 | 0.589378 | 0.323647 | 0.321288  | 0.979596    | 0.972194     |
| Breast cancer [Global]                          | Female | 15-19 years | 95+ years | 0.216748 | 0.310419 | 0.165176 | 0.166307  | 0.997027    | 0.98881      |
| Breast cancer [Data Rich]                       | Male   | 15-19 years | 95+ years | 0.34414  | 0.423914 | 0.292649 | 0.322339  | 0.980114    | 0.978151     |
| Breast cancer [Data Rich]                       | Female | 15-19 years | 95+ years | 0.195491 | 0.240038 | 0.155341 | 0.166431  | 0.997292    | 0.99507      |
| Cervical cancer [Global]                        | Female | 15-19 years | 95+ years | 0.245094 | 0.352516 | 0.19563  | 0.192966  | 0.998476    | 0.989165     |

| Cause                                  | Sex    | Age start   | Age end   | RMSE in  | RMSE out | Trend in | Trend out | Coverage in | Coverage out |
|----------------------------------------|--------|-------------|-----------|----------|----------|----------|-----------|-------------|--------------|
| Cervical cancer [Data Rich]            | Female | 15-19 years | 95+ years | 0.241724 | 0.29846  | 0.186658 | 0.217324  | 0.9987      | 0.997897     |
| Uterine cancer [Global]                | Female | 15-19 years | 95+ years | 0.391178 | 0.503325 | 0.32267  | 0.320455  | 0.993716    | 0.985594     |
| Uterine cancer [Data Rich]             | Female | 15-19 years | 95+ years | 0.347638 | 0.432616 | 0.293526 | 0.339577  | 0.992896    | 0.990392     |
| Prostate cancer [Global]               | Male   | 15-19 years | 95+ years | 0.261885 | 0.334721 | 0.194583 | 0.189884  | 0.994471    | 0.989097     |
| Prostate cancer [Data Rich]            | Male   | 15-19 years | 95+ years | 0.253196 | 0.306624 | 0.200772 | 0.221651  | 0.99481     | 0.992986     |
| Colon and rectum cancer [Global]       | Male   | 15-19 years | 95+ years | 0.215815 | 0.307782 | 0.168321 | 0.166479  | 0.999167    | 0.991478     |
| Colon and rectum cancer [Global]       | Female | 15-19 years | 95+ years | 0.207768 | 0.285991 | 0.162728 | 0.161992  | 0.9991      | 0.993835     |
| Colon and rectum cancer [Data Rich]    | Male   | 15-19 years | 95+ years | 0.186963 | 0.231209 | 0.148635 | 0.162856  | 0.999058    | 0.998396     |
| Colon and rectum cancer [Data Rich]    | Female | 15-19 years | 95+ years | 0.185287 | 0.229259 | 0.149807 | 0.168456  | 0.998848    | 0.997696     |
| Lip and oral cavity cancer [Global]    | Male   | 15-19 years | 95+ years | 0.243983 | 0.329562 | 0.195246 | 0.192919  | 0.999138    | 0.995276     |
| Lip and oral cavity cancer [Global]    | Female | 15-19 years | 95+ years | 0.229471 | 0.321962 | 0.17436  | 0.177688  | 0.999838    | 0.998323     |
| Lip and oral cavity cancer [Data Rich] | Male   | 15-19 years | 95+ years | 0.222917 | 0.264831 | 0.184055 | 0.187256  | 0.999655    | 0.999148     |
| Lip and oral cavity cancer [Data Rich] | Female | 15-19 years | 95+ years | 0.200638 | 0.243518 | 0.163584 | 0.175329  | 0.999962    | 0.99985      |
| Nasopharynx cancer [Global]            | Male   | 5-9 years   | 95+ years | 0.294744 | 0.434429 | 0.245704 | 0.244664  | 0.99937     | 0.988833     |
| Nasopharynx cancer [Global]            | Female | 5-9 years   | 95+ years | 0.310529 | 0.513749 | 0.251792 | 0.255842  | 0.994865    | 0.985828     |
| Nasopharynx cancer [Data Rich]         | Male   | 5-9 years   | 95+ years | 0.273312 | 0.334949 | 0.23703  | 0.256489  | 0.999498    | 0.999131     |

| Cause                                            | Sex    | Age start   | Age end   | RMSE in  | RMSE out | Trend in | Trend out | Coverage in | Coverage out |
|--------------------------------------------------|--------|-------------|-----------|----------|----------|----------|-----------|-------------|--------------|
| Nasopharynx cancer [Data Rich]                   | Female | 5-9 years   | 95+ years | 0.275621 | 0.349798 | 0.236947 | 0.275996  | 0.995706    | 0.995532     |
| Other pharynx cancer [Global]                    | Male   | 15-19 years | 95+ years | 0.272454 | 0.418083 | 0.21142  | 0.208013  | 0.997829    | 0.991554     |
| Other pharynx cancer [Global]                    | Female | 15-19 years | 95+ years | 0.27185  | 0.384483 | 0.216709 | 0.210653  | 0.997378    | 0.994978     |
| Other pharynx cancer [Data Rich]                 | Male   | 15-19 years | 95+ years | 0.224387 | 0.285489 | 0.184834 | 0.189465  | 0.997791    | 0.997215     |
| Other pharynx cancer [Data Rich]                 | Female | 15-19 years | 95+ years | 0.241625 | 0.303076 | 0.201824 | 0.223991  | 0.997068    | 0.996908     |
| Gallbladder and biliary tract cancer [Global]    | Male   | 15-19 years | 95+ years | 0.254268 | 0.366804 | 0.193857 | 0.196686  | 0.999086    | 0.994061     |
| Gallbladder and biliary tract cancer [Data Rich] | Male   | 15-19 years | 95+ years | 0.208396 | 0.261747 | 0.17115  | 0.183115  | 0.998903    | 0.998238     |
| Gallbladder and biliary tract cancer [Data Rich] | Female | 15-19 years | 95+ years | 0.208549 | 0.266142 | 0.165342 | 0.175829  | 0.997261    | 0.996325     |
| Gallbladder and biliary tract cancer [Global]    | Female | 15-19 years | 95+ years | 0.260782 | 0.384139 | 0.19097  | 0.194698  | 0.997558    | 0.989035     |
| Pancreatic cancer [Global]                       | Male   | 15-19 years | 95+ years | 0.230022 | 0.325349 | 0.17727  | 0.181061  | 0.998899    | 0.996541     |
| Pancreatic cancer [Global]                       | Female | 15-19 years | 95+ years | 0.226263 | 0.329164 | 0.173318 | 0.180608  | 0.99891     | 0.995753     |
| Pancreatic cancer [Data Rich]                    | Male   | 15-19 years | 95+ years | 0.199472 | 0.251215 | 0.159138 | 0.170106  | 0.99881     | 0.998039     |
| Pancreatic cancer [Data Rich]                    | Female | 15-19 years | 95+ years | 0.205278 | 0.263711 | 0.163246 | 0.180398  | 0.998614    | 0.997617     |
| Malignant skin melanoma [Global]                 | Female | 15-19 years | 95+ years | 0.317541 | 0.425864 | 0.237954 | 0.233187  | 0.997069    | 0.992775     |
| Malignant skin melanoma [Data Rich]              | Male   | 15-19 years | 95+ years | 0.302786 | 0.362217 | 0.238219 | 0.244798  | 0.997655    | 0.996336     |
| Malignant skin melanoma [Data Rich]              | Female | 15-19 years | 95+ years | 0.308657 | 0.349784 | 0.225476 | 0.22533   | 0.997276    | 0.996477     |

| Cause                                | Sex    | Age start   | Age end   | RMSE in  | RMSE out | Trend in | Trend out | Coverage in | Coverage out |
|--------------------------------------|--------|-------------|-----------|----------|----------|----------|-----------|-------------|--------------|
| Malignant skin melanoma [Global]     | Male   | 15-19 years | 95+ years | 0.324862 | 0.470987 | 0.247424 | 0.248056  | 0.997433    | 0.99238      |
| Non-melanoma skin cancer [Global]    | Male   | 15-19 years | 95+ years | 0.195688 | 0.319609 | 0.137537 | 0.140799  | 0.999637    | 0.996403     |
| Non-melanoma skin cancer [Global]    | Female | 15-19 years | 95+ years | 0.287998 | 0.483215 | 0.206044 | 0.206916  | 0.995877    | 0.987457     |
| Non-melanoma skin cancer [Data Rich] | Male   | 15-19 years | 95+ years | 0.158274 | 0.251075 | 0.119607 | 0.140712  | 0.99992     | 0.999745     |
| Non-melanoma skin cancer [Data Rich] | Female | 15-19 years | 95+ years | 0.208859 | 0.29464  | 0.163968 | 0.184091  | 0.998381    | 0.998243     |
| Ovarian cancer [Global]              | Female | 15-19 years | 95+ years | 0.269338 | 0.379484 | 0.210419 | 0.21246   | 0.997991    | 0.992838     |
| Ovarian cancer [Data Rich]           | Female | 15-19 years | 95+ years | 0.249656 | 0.314928 | 0.2025   | 0.223452  | 0.997926    | 0.996589     |
| Testicular cancer [Global]           | Male   | 15-19 years | 95+ years | 0.525353 | 0.75263  | 0.41868  | 0.413082  | 0.99175     | 0.979829     |
| Testicular cancer [Data Rich]        | Male   | 15-19 years | 95+ years | 0.44447  | 0.585815 | 0.380785 | 0.409933  | 0.994954    | 0.993704     |
| Kidney cancer [Global]               | Male   | 0-6 days    | 95+ years | 0.289998 | 0.386281 | 0.22212  | 0.224688  | 0.998628    | 0.995196     |
| Kidney cancer [Global]               | Female | 0-6 days    | 95+ years | 0.315211 | 0.440159 | 0.250794 | 0.258895  | 0.9992      | 0.995614     |
| Kidney cancer [Data Rich]            | Male   | 0-6 days    | 95+ years | 0.255827 | 0.338846 | 0.204055 | 0.215843  | 0.998978    | 0.99814      |
| Kidney cancer [Data Rich]            | Female | 0-6 days    | 95+ years | 0.285315 | 0.393522 | 0.233569 | 0.272496  | 0.999415    | 0.998674     |
| Bladder cancer [Global]              | Male   | 15-19 years | 95+ years | 0.287397 | 0.365265 | 0.230569 | 0.228823  | 0.998278    | 0.994441     |
| Bladder cancer [Data Rich]           | Male   | 15-19 years | 95+ years | 0.264631 | 0.315756 | 0.216242 | 0.237309  | 0.998019    | 0.996354     |
| Bladder cancer [Global]              | Female | 15-19 years | 95+ years | 0.279008 | 0.378    | 0.223774 | 0.223645  | 0.998263    | 0.996579     |

| Cause                                       | Sex    | Age start   | Age end   | RMSE in  | RMSE out | Trend in | Trend out | Coverage in | Coverage out |
|---------------------------------------------|--------|-------------|-----------|----------|----------|----------|-----------|-------------|--------------|
| Bladder cancer [Data Rich]                  | Female | 15-19 years | 95+ years | 0.252722 | 0.308163 | 0.208564 | 0.23335   | 0.997751    | 0.997004     |
| Brain and nervous system cancer [Global]    | Male   | 0-6 days    | 95+ years | 0.287997 | 0.40759  | 0.207832 | 0.210594  | 0.999286    | 0.995762     |
| Brain and nervous system cancer [Global]    | Female | 0-6 days    | 95+ years | 0.295571 | 0.441965 | 0.210233 | 0.213385  | 0.99934     | 0.994437     |
| Brain and nervous system cancer [Data Rich] | Female | 0-6 days    | 95+ years | 0.25376  | 0.34089  | 0.198323 | 0.221916  | 0.99925     | 0.998585     |
| Brain and nervous system cancer [Data Rich] | Male   | 0-6 days    | 95+ years | 0.251652 | 0.330656 | 0.195936 | 0.221749  | 0.999177    | 0.99846      |
| Thyroid cancer [Global]                     | Male   | 10-14 years | 95+ years | 0.32668  | 0.411793 | 0.258283 | 0.256036  | 0.999003    | 0.997237     |
| Thyroid cancer [Global]                     | Female | 10-14 years | 95+ years | 0.393795 | 0.469805 | 0.309749 | 0.297907  | 0.99732     | 0.99322      |
| Thyroid cancer [Data Rich]                  | Male   | 10-14 years | 95+ years | 0.29961  | 0.343919 | 0.24192  | 0.242875  | 0.999315    | 0.998819     |
| Thyroid cancer [Data Rich]                  | Female | 10-14 years | 95+ years | 0.373407 | 0.409581 | 0.306816 | 0.270715  | 0.996954    | 0.995009     |
| Mesothelioma [Global]                       | Female | 15-19 years | 95+ years | 0.282864 | 0.467146 | 0.215374 | 0.224718  | 0.998947    | 0.992185     |
| Mesothelioma [Data Rich]                    | Female | 15-19 years | 95+ years | 0.237996 | 0.351665 | 0.1964   | 0.259248  | 0.999361    | 0.997967     |
| Mesothelioma [Global]                       | Male   | 15-19 years | 95+ years | 0.426748 | 0.606294 | 0.328862 | 0.344277  | 0.991646    | 0.984781     |
| Mesothelioma [Data Rich]                    | Male   | 15-19 years | 95+ years | 0.363144 | 0.488407 | 0.307957 | 0.383513  | 0.993075    | 0.991967     |
| Hodgkin lymphoma [Global]                   | Male   | 0-6 days    | 95+ years | 0.415824 | 0.517674 | 0.315878 | 0.307721  | 0.998828    | 0.995846     |
| Hodgkin lymphoma [Data Rich]                | Male   | 0-6 days    | 95+ years | 0.329028 | 0.412763 | 0.268298 | 0.28595   | 0.999218    | 0.998668     |
| Hodgkin lymphoma [Global]                   | Female | 0-6 days    | 95+ years | 0.569227 | 0.727116 | 0.389178 | 0.38162   | 0.985625    | 0.98131      |

| Cause                                 | Sex    | Age start   | Age end   | RMSE in  | RMSE out | Trend in | Trend out | Coverage in | Coverage out |
|---------------------------------------|--------|-------------|-----------|----------|----------|----------|-----------|-------------|--------------|
| Hodgkin lymphoma [Data Rich]          | Female | 0-6 days    | 95+ years | 0.424797 | 0.609332 | 0.331318 | 0.327455  | 0.981233    | 0.977821     |
| Non-Hodgkin lymphoma [Global]         | Male   | 0-6 days    | 95+ years | 0.305999 | 0.412638 | 0.247129 | 0.243252  | 0.999259    | 0.995427     |
| Non-Hodgkin lymphoma [Global]         | Female | 0-6 days    | 95+ years | 0.316899 | 0.423081 | 0.256181 | 0.250749  | 0.998991    | 0.994631     |
| Non-Hodgkin lymphoma [Data Rich]      | Male   | 0-6 days    | 95+ years | 0.279909 | 0.349591 | 0.233112 | 0.240689  | 0.999379    | 0.998026     |
| Non-Hodgkin lymphoma [Data Rich]      | Female | 0-6 days    | 95+ years | 0.28747  | 0.361956 | 0.242374 | 0.256737  | 0.99904     | 0.996828     |
| Multiple myeloma [Global]             | Male   | 15-19 years | 95+ years | 0.364477 | 0.445523 | 0.286465 | 0.275877  | 0.997234    | 0.992632     |
| Multiple myeloma [Global]             | Female | 15-19 years | 95+ years | 0.339401 | 0.424347 | 0.268622 | 0.260954  | 0.997969    | 0.995751     |
| Multiple myeloma [Data Rich]          | Male   | 15-19 years | 95+ years | 0.308363 | 0.37482  | 0.250986 | 0.260853  | 0.998218    | 0.99702      |
| Multiple myeloma [Data Rich]          | Female | 15-19 years | 95+ years | 0.285548 | 0.352248 | 0.235543 | 0.245693  | 0.997842    | 0.996106     |
| Leukemia [Global]                     | Male   | 0-6 days    | 95+ years | 0.306475 | 0.377643 | 0.280105 | 0.285654  | 0.998208    | 0.995148     |
| Leukemia [Global]                     | Female | 0-6 days    | 95+ years | 0.288726 | 0.351885 | 0.24126  | 0.236533  | 0.999433    | 0.996253     |
| Leukemia [Data Rich]                  | Male   | 0-6 days    | 95+ years | 0.236805 | 0.294968 | 0.198659 | 0.229014  | 0.999188    | 0.998035     |
| Leukemia [Data Rich]                  | Female | 0-6 days    | 95+ years | 0.234065 | 0.284538 | 0.199422 | 0.225589  | 0.999161    | 0.997809     |
| Other malignant neoplasms [Global]    | Male   | 0-6 days    | 95+ years | 0.272826 | 0.358933 | 0.225949 | 0.232273  | 0.997717    | 0.995307     |
| Other malignant neoplasms [Global]    | Female | 0-6 days    | 95+ years | 0.267153 | 0.34739  | 0.219567 | 0.224348  | 0.998184    | 0.995562     |
| Other malignant neoplasms [Data Rich] | Male   | 0-6 days    | 95+ years | 0.256434 | 0.30301  | 0.218515 | 0.223732  | 0.997282    | 0.995095     |



| Cause                                                                              | Sex    | Age start | Age end   | RMSE in  | RMSE out | Trend in | Trend out | Coverage in | Coverage out |
|------------------------------------------------------------------------------------|--------|-----------|-----------|----------|----------|----------|-----------|-------------|--------------|
| Other malignant neoplasms [Data Rich]                                              | Female | 0-6 days  | 95+ years | 0.258453 | 0.303888 | 0.214106 | 0.22064   | 0.997583    | 0.995989     |
| Myelodysplastic, myeloproliferative, and other hematopoietic neoplasms [Data Rich] | Male   | 0-6 days  | 95+ years | 0.320492 | 0.399563 | 0.183437 | 0.216861  | 0.997662    | 0.997192     |
| Myelodysplastic, myeloproliferative, and other hematopoietic neoplasms [Global]    | Male   | 0-6 days  | 95+ years | 0.393172 | 0.598192 | 0.224264 | 0.220657  | 0.994678    | 0.983857     |
| Myelodysplastic, myeloproliferative, and other hematopoietic neoplasms [Data Rich] | Female | 0-6 days  | 95+ years | 0.234272 | 0.38783  | 0.166407 | 0.21485   | 0.997248    | 0.997123     |
| Myelodysplastic, myeloproliferative, and other hematopoietic neoplasms [Global]    | Female | 0-6 days  | 95+ years | 0.350205 | 0.569814 | 0.216349 | 0.228908  | 0.994822    | 0.987224     |

*eTable 11: Percent change before and after CoDCorrect by cancer for all ages, both sexes combined, 2017*

| <b>Cause</b>                         | <b>CoDCorrect level</b> | <b>Percent change</b>     |
|--------------------------------------|-------------------------|---------------------------|
| Neoplasms                            | 2                       | 2.07<br>-1.93 to 6.19     |
| Esophageal cancer                    | 3                       | 1.48<br>-3.85 to 6.95     |
| Stomach cancer                       | 3                       | 0.42<br>-3.27 to 4.17     |
| Liver cancer                         | 3                       | -0.42<br>-9.0 to 6.49     |
| Liver cancer due to hepatitis B      | 4                       | -17.92<br>-31.35 to -1.43 |
| Liver cancer due to hepatitis C      | 4                       | -13.12<br>-23.78 to -2.2  |
| Liver cancer due to alcohol use      | 4                       | -18.81<br>-33.09 to -1.12 |
| Liver cancer due to other causes     | 4                       | 43.8<br>22.91 to 70.2     |
| Larynx cancer                        | 3                       | 6.57<br>1.28 to 12.12     |
| Tracheal, bronchus, and lung cancer  | 3                       | -4.08<br>-8.66 to -0.0    |
| Breast cancer                        | 3                       | 3.82<br>-2.11 to 11.11    |
| Cervical cancer                      | 3                       | 5.27<br>-6.92 to 18.94    |
| Uterine cancer                       | 3                       | -2.97<br>-10.19 to 4.61   |
| Prostate cancer                      | 3                       | -0.21<br>-19.14 to 37.36  |
| Colon and rectum cancer              | 3                       | 1.93<br>-2.01 to 5.7      |
| Lip and oral cavity cancer           | 3                       | -5.9<br>-12.23 to 0.97    |
| Nasopharynx cancer                   | 3                       | 1.39<br>-6.45 to 9.27     |
| Other pharynx cancer                 | 3                       | 13.97<br>2.17 to 27.95    |
| Gallbladder and biliary tract cancer | 3                       | -9.98<br>-25.56 to 5.56   |
| Pancreatic cancer                    | 3                       | 1.33<br>-2.49 to 5.23     |
| Malignant skin melanoma              | 3                       | 8.25<br>-14.1 to 29.36    |
| Non-melanoma skin cancer             | 3                       | -0.71<br>-5.86 to 5.52    |

|                                                                        |   |                            |
|------------------------------------------------------------------------|---|----------------------------|
| Ovarian cancer                                                         | 3 | -2.6<br>-8.48 to 5.49      |
| Testicular cancer                                                      | 3 | -53.85<br>-64.01 to -35.82 |
| Kidney cancer                                                          | 3 | 7.11<br>1.24 to 15.21      |
| Bladder cancer                                                         | 3 | 6.99<br>1.58 to 14.65      |
| Brain and nervous system cancer                                        | 3 | -6.48<br>-16.09 to 17.93   |
| Thyroid cancer                                                         | 3 | 12.81<br>5.56 to 28.28     |
| Mesothelioma                                                           | 3 | 6.88<br>-1.22 to 15.53     |
| Hodgkin lymphoma                                                       | 3 | 27.42<br>11.82 to 60.49    |
| Non-Hodgkin lymphoma                                                   | 3 | -1.97<br>-6.73 to 10.11    |
| Multiple myeloma                                                       | 3 | -3.8<br>-14.7 to 12.64     |
| Leukemia                                                               | 3 | 0.82<br>-10.01 to 11.6     |
| Other malignant cancers                                                | 3 | 89.59<br>69.04 to 106.25   |
| Myelodysplastic, myeloproliferative, and other hematopoietic neoplasms | 4 | -100.0<br>-100.0 to -100.0 |

eTable 12: Duration of four prevalence phases by cancer

|                                    | Diagnosis/<br>Treatment<br>(months) | Remission                                                                        | Disseminated/metastatic<br>(months)                               | Note                                                              | Terminal<br>(months) |
|------------------------------------|-------------------------------------|----------------------------------------------------------------------------------|-------------------------------------------------------------------|-------------------------------------------------------------------|----------------------|
| Esophageal cancer                  | 5 <sup>41</sup>                     | Calculated based on<br>remainder of time after<br>attributing other<br>sequelae. | 4.6 <sup>42</sup>                                                 | SEER Summary Stage 1997 (Distant<br>site/node involved) 1995-2000 | 1 months             |
| Stomach cancer                     | 5.2 <sup>41</sup>                   |                                                                                  | 3.88 <sup>42</sup>                                                | SEER Summary Stage 1997 (Distant<br>site/node involved) 1995-2000 |                      |
| Liver cancer                       | 4                                   |                                                                                  | 2.51 <sup>42</sup>                                                | SEER Summary Stage 1997 (Distant<br>site/node involved) 1995-2000 |                      |
| Larynx cancer                      | 5.3 <sup>41</sup>                   |                                                                                  | 8.84 <sup>42</sup>                                                | SEER Stage IVc                                                    |                      |
| Lung cancer                        | 3.3 <sup>43</sup>                   |                                                                                  | 4.51 <sup>42</sup>                                                | SEER Summary Stage 1997 (Distant<br>site/node involved) 1995-2000 |                      |
| Breast cancer                      | 3 <sup>43</sup>                     |                                                                                  | 17.7 <sup>42</sup>                                                | SEER Summary Stage 1997 (Distant<br>site/node involved) 1995-2000 |                      |
| Cervical cancer                    | 4.8 <sup>41</sup>                   |                                                                                  | 9.21 <sup>42</sup>                                                | SEER Summary Stage 1997 (Distant<br>site/node involved) 1995-2000 |                      |
| Uterine cancer                     | 4.6 <sup>41</sup>                   |                                                                                  | 11.6 <sup>42</sup>                                                | SEER Summary Stage 1997 (Distant<br>site/node involved) 1995-2000 |                      |
| Prostate cancer                    | 4 <sup>43</sup>                     |                                                                                  | 30.35 <sup>42</sup>                                               | SEER Summary Stage 1997 (Distant<br>site/node involved) 1995-2000 |                      |
| Colorectal cancer                  | 4 <sup>43</sup>                     |                                                                                  | 9.69 <sup>42</sup>                                                | SEER Summary Stage 1997 (Distant<br>site/node involved) 1995-2000 |                      |
| Oral cancer                        | 5.3 <sup>41</sup>                   |                                                                                  | 9.33 <sup>42</sup>                                                | SEER Stage IVc                                                    |                      |
| Nasopharyngeal<br>cancer           | 5.3 <sup>41</sup>                   |                                                                                  | 13.19 <sup>42</sup>                                               | SEER Stage IVc                                                    |                      |
| Cancer of other part<br>of pharynx | 5.3 <sup>41</sup>                   |                                                                                  | 7.91 <sup>42</sup>                                                | SEER Stage IVc                                                    |                      |
| Gallbladder cancer                 | 4                                   |                                                                                  | 3.47 <sup>42</sup>                                                | SEER Summary Stage 1997 (Distant<br>site/node involved) 1995-2000 |                      |
| Pancreas cancer                    | 4.1 <sup>41</sup>                   | 2.54 <sup>42</sup>                                                               | SEER Summary Stage 1997 (Distant<br>site/node involved) 1995-2000 |                                                                   |                      |

|                                | Diagnosis/<br>Treatment<br>(months) | Remission | Disseminated/metastatic<br>(months) | Note                                                                          | Terminal<br>(months) |
|--------------------------------|-------------------------------------|-----------|-------------------------------------|-------------------------------------------------------------------------------|----------------------|
| Melanoma                       | 2.9 <sup>44</sup>                   |           | 7.18 <sup>42</sup>                  | SEER Summary Stage 1997 (Distant site/node involved) 1995-2000                |                      |
| NMSC (squamous cell carcinoma) | 2.9 <sup>44</sup>                   |           | 17 <sup>45</sup>                    |                                                                               |                      |
| Ovarian cancer                 | 3.2 <sup>43</sup>                   |           | 25.6 <sup>42</sup>                  | SEER Summary Stage 1997 (Distant site/node involved) 1995-2000                |                      |
| Testicular cancer              | 3.7 <sup>41</sup>                   |           | 19.47 <sup>42</sup>                 | SEER Stage III                                                                |                      |
| Kidney cancer                  | 5.3 <sup>41</sup>                   |           | 5.38 <sup>42</sup>                  | SEER Summary Stage 1997 (Distant site/node involved) 1995-2000                |                      |
| Bladder cancer                 | 5.1 <sup>41</sup>                   |           | 5.8 <sup>42</sup>                   | SEER Summary Stage 1997 (Distant site/node involved) 1995-2000                |                      |
| Brain cancer                   | 5                                   |           | 6.93 <sup>42</sup>                  | SEER Median age standardized survival all patients, all years                 |                      |
| Thyroid cancer                 | 3                                   |           | 19.39 <sup>42</sup>                 | SEER Stage IVc                                                                |                      |
| Mesothelioma                   | 4                                   |           | 7.75 <sup>42</sup>                  | SEER Summary Stage 1997 (Distant site/node involved) 1995-2000                |                      |
| Hodgkin lymphoma               | 3.7 <sup>43</sup>                   |           | 26 <sup>46</sup>                    |                                                                               |                      |
| Non-Hodgkin lymphoma           | 3.7 <sup>43</sup>                   |           | 7.7 <sup>46</sup>                   |                                                                               |                      |
| Multiple myeloma               | 7 <sup>41</sup>                     |           | 36.82 <sup>42</sup>                 | SEER Median age standardized survival all patients, all years                 |                      |
| Leukemia <sup>41</sup>         | 5                                   |           | 43.67 <sup>42</sup>                 | SEER Median age standardized survival all patients, all years                 |                      |
| ALL                            | 12                                  |           | 7.02 <sup>42</sup>                  | SEER Median age standardized survival all patients, all years                 |                      |
| AML                            | 6                                   |           | 4.6 <sup>42</sup>                   | SEER Median age standardized survival all patients, all years                 |                      |
| CLL                            | 6                                   |           | 48 <sup>47</sup>                    |                                                                               |                      |
| CML                            | 6                                   |           | 4.6 <sup>42</sup>                   | SEER Median age standardized survival for AML (patients with CML die in blast |                      |

|                | <b>Diagnosis/<br/>Treatment<br/>(months)</b> | <b>Remission</b> | <b>Disseminated/metastatic<br/>(months)</b> | <b>Note</b>                                                   | <b>Terminal<br/>(months)</b> |
|----------------|----------------------------------------------|------------------|---------------------------------------------|---------------------------------------------------------------|------------------------------|
|                |                                              |                  |                                             | crisis, which is treated like AML) all patients, all years    |                              |
| Other leukemia | 6                                            |                  | 48 <sup>47</sup>                            |                                                               |                              |
| Other          | 4.4 (mean of other cancer durations)         |                  | 15.81 <sup>42</sup>                         | SEER Median age standardized survival all patients, all years |                              |

eTable 13: Disability weights

| Health state                                | Lay description                                                                                                                                                                                                            | Estimate | Uncertainty interval |       |
|---------------------------------------------|----------------------------------------------------------------------------------------------------------------------------------------------------------------------------------------------------------------------------|----------|----------------------|-------|
| Cancer, diagnosis and primary therapy       | Has pain, nausea, fatigue, weight loss and high anxiety.                                                                                                                                                                   | 0.288    | 0.193                | 0.399 |
| Cancer, controlled phase                    | Has a chronic disease that requires medication every day and causes some worry but minimal interference with daily activities.                                                                                             | 0.049    | 0.031                | 0.072 |
| Cancer, metastatic                          | Has severe pain, extreme fatigue, weight loss and high anxiety.                                                                                                                                                            | 0.451    | 0.307                | 0.600 |
| Terminal phase, with medication             | Has lost a lot of weight and regularly uses strong medication to avoid constant pain. The person has no appetite, feels nauseous, and needs to spend most of the day in bed.                                               | 0.540    | 0.377                | 0.687 |
| Mastectomy                                  | Had one of the breasts removed and sometimes has pain or swelling in the arms.                                                                                                                                             | 0.036    | 0.020                | 0.057 |
| Stoma                                       | Has a pouch attached to an opening in the belly to collect and empty stools.                                                                                                                                               | 0.095    | 0.063                | 0.131 |
| Laryngectomy                                | Has difficulty speaking, and others find it difficult to understand.                                                                                                                                                       | 0.051    | 0.032                | 0.078 |
| Urinary incontinence                        | Cannot control urinating.                                                                                                                                                                                                  | 0.139    | 0.094                | 0.198 |
| Impotence                                   | Has difficulty in obtaining or maintaining an erection.                                                                                                                                                                    | 0.017    | 0.009                | 0.030 |
| Cutaneous squamous cell carcinoma, mild     | Has a slight, visible physical deformity that others notice, which causes some worry and discomfort.                                                                                                                       | 0.011    | 0.005                | 0.021 |
| Cutaneous squamous cell carcinoma, moderate | Has a visible physical deformity that causes others to stare and comment. As a result, the person is worried and has trouble sleeping and concentrating.                                                                   | 0.067    | 0.044                | 0.096 |
| Cutaneous squamous cell carcinoma, severe   | Has an obvious physical deformity that is very painful and itchy. The physical deformity makes others uncomfortable, which causes the person to avoid social contact, feel worried, sleep poorly, and think about suicide. | 0.576    | 0.401                | 0.731 |
| Disfigurement due to basal cell carcinoma   | Has a slight, visible physical deformity that others notice, which causes some worry and discomfort.                                                                                                                       | 0.011    | 0.005                | 0.021 |

eTable 14: Decomposition of trends in incidence globally, and by SDI quintile, both sexes, 2007 to 2017

| Cause                      | Location        | Incidence cases, No. |          | Expected incidence cases, 2017, No. |                                   | Change in incidence cases, 2007 to 2017, % |                                |                                 | Overall change, % |
|----------------------------|-----------------|----------------------|----------|-------------------------------------|-----------------------------------|--------------------------------------------|--------------------------------|---------------------------------|-------------------|
|                            |                 | 2007                 | 2017     | Given population growth alone       | Given population growth and aging | Due to population growth                   | Due to change in age structure | Due to change in incidence rate |                   |
| Neoplasms                  | Global          | 18363006             | 24490934 | 20729426                            | 23925301                          | 12.9                                       | 17.4                           | 3.1                             | 33.4              |
| Neoplasms                  | High SDI        | 10029569             | 12370677 | 10627733                            | 12147895                          | 6                                          | 15.2                           | 2.2                             | 23.3              |
| Neoplasms                  | High-middle SDI | 3289377              | 4655552  | 3549405                             | 4194610                           | 7.9                                        | 19.6                           | 14                              | 41.5              |
| Neoplasms                  | Middle SDI      | 2977105              | 4521483  | 3266447                             | 3977385                           | 9.7                                        | 23.9                           | 18.3                            | 51.9              |
| Neoplasms                  | Low-middle SDI  | 1305724              | 1872608  | 1550724                             | 1713165                           | 18.8                                       | 12.4                           | 12.2                            | 43.4              |
| Neoplasms                  | Low SDI         | 703571               | 981047   | 873410                              | 945594                            | 24.1                                       | 10.3                           | 5                               | 39.4              |
| Lip and oral cavity cancer | Global          | 277567               | 389760   | 313336                              | 357481                            | 12.9                                       | 15.9                           | 11.6                            | 40.4              |
| Lip and oral cavity cancer | High SDI        | 83142                | 100223   | 88100                               | 99310                             | 6                                          | 13.5                           | 1.1                             | 20.5              |
| Lip and oral cavity cancer | High-middle SDI | 42729                | 56734    | 46107                               | 54793                             | 7.9                                        | 20.3                           | 4.5                             | 32.8              |
| Lip and oral cavity cancer | Middle SDI      | 58703                | 93980    | 64407                               | 78714                             | 9.7                                        | 24.4                           | 26                              | 60.1              |
| Lip and oral cavity cancer | Low-middle SDI  | 63087                | 95976    | 74923                               | 83170                             | 18.8                                       | 13.1                           | 20.3                            | 52.1              |
| Lip and oral cavity cancer | Low SDI         | 29269                | 41778    | 36334                               | 40044                             | 24.1                                       | 12.7                           | 5.9                             | 42.7              |
| Nasopharynx cancer         | Global          | 91222                | 109781   | 102977                              | 112020                            | 12.9                                       | 9.9                            | -2.5                            | 20.3              |
| Nasopharynx cancer         | High SDI        | 12978                | 12798    | 13751                               | 14777                             | 6                                          | 7.9                            | -15.2                           | -1.4              |
| Nasopharynx cancer         | High-middle SDI | 23609                | 28643    | 25475                               | 28308                             | 7.9                                        | 12                             | 1.4                             | 21.3              |
| Nasopharynx cancer         | Middle SDI      | 32839                | 41135    | 36030                               | 41216                             | 9.7                                        | 15.8                           | -0.2                            | 25.3              |
| Nasopharynx cancer         | Low-middle SDI  | 13457                | 16459    | 15981                               | 17319                             | 18.8                                       | 9.9                            | -6.4                            | 22.3              |
| Nasopharynx cancer         | Low SDI         | 7621                 | 9884     | 9460                                | 10170                             | 24.1                                       | 9.3                            | -3.8                            | 29.7              |
| Other pharynx cancer       | Global          | 123808               | 179326   | 139763                              | 160459                            | 12.9                                       | 16.7                           | 15.2                            | 44.8              |
| Other pharynx cancer       | High SDI        | 39797                | 49665    | 42170                               | 46917                             | 6                                          | 11.9                           | 6.9                             | 24.8              |
| Other pharynx cancer       | High-middle SDI | 17396                | 23803    | 18770                               | 22505                             | 7.9                                        | 21.5                           | 7.5                             | 36.8              |
| Other pharynx cancer       | Middle SDI      | 20427                | 34384    | 22412                               | 27735                             | 9.7                                        | 26.1                           | 32.5                            | 68.3              |
| Other pharynx cancer       | Low-middle SDI  | 28138                | 43214    | 33417                               | 37475                             | 18.8                                       | 14.4                           | 20.4                            | 53.6              |
| Other pharynx cancer       | Low SDI         | 17885                | 27982    | 22202                               | 24486                             | 24.1                                       | 12.8                           | 19.5                            | 56.5              |
| Esophageal cancer          | Global          | 404691               | 472525   | 456843                              | 532885                            | 12.9                                       | 18.8                           | -14.9                           | 16.8              |



| Cause                                | Location        | Incidence cases, No. |         | Expected incidence cases, 2017, No. |                                   | Change in incidence cases, 2007 to 2017, % |                                |                                 | Overall change, % |
|--------------------------------------|-----------------|----------------------|---------|-------------------------------------|-----------------------------------|--------------------------------------------|--------------------------------|---------------------------------|-------------------|
|                                      |                 | 2007                 | 2017    | Given population growth alone       | Given population growth and aging | Due to population growth                   | Due to change in age structure | Due to change in incidence rate |                   |
| Esophageal cancer                    | High SDI        | 79937                | 92352   | 84704                               | 97561                             | 6                                          | 16.1                           | -6.5                            | 15.5              |
| Esophageal cancer                    | High-middle SDI | 123504               | 145072  | 133266                              | 161932                            | 7.9                                        | 23.2                           | -13.7                           | 17.5              |
| Esophageal cancer                    | Middle SDI      | 134257               | 149107  | 147305                              | 187944                            | 9.7                                        | 30.3                           | -28.9                           | 11.1              |
| Esophageal cancer                    | Low-middle SDI  | 41816                | 52324   | 49661                               | 56226                             | 18.8                                       | 15.7                           | -9.3                            | 25.1              |
| Esophageal cancer                    | Low SDI         | 21519                | 29591   | 26713                               | 29657                             | 24.1                                       | 13.7                           | -0.3                            | 37.5              |
| Stomach cancer                       | Global          | 975825               | 1220662 | 1101578                             | 1281878                           | 12.9                                       | 18.5                           | -6.3                            | 25.1              |
| Stomach cancer                       | High SDI        | 274269               | 299043  | 290626                              | 338145                            | 6                                          | 17.3                           | -14.3                           | 9                 |
| Stomach cancer                       | High-middle SDI | 294238               | 382392  | 317498                              | 381939                            | 7.9                                        | 21.9                           | 0.2                             | 30                |
| Stomach cancer                       | Middle SDI      | 259682               | 357404  | 284920                              | 359140                            | 9.7                                        | 28.6                           | -0.7                            | 37.6              |
| Stomach cancer                       | Low-middle SDI  | 89957                | 108761  | 106835                              | 120683                            | 18.8                                       | 15.4                           | -13.3                           | 20.9              |
| Stomach cancer                       | Low SDI         | 50783                | 63267   | 63042                               | 69837                             | 24.1                                       | 13.4                           | -12.9                           | 24.6              |
| Colon and rectum cancer              | Global          | 1331164              | 1833451 | 1502709                             | 1762209                           | 12.9                                       | 19.5                           | 5.4                             | 37.7              |
| Colon and rectum cancer              | High SDI        | 724649               | 860022  | 767867                              | 892171                            | 6                                          | 17.2                           | -4.4                            | 18.7              |
| Colon and rectum cancer              | High-middle SDI | 291577               | 447220  | 314626                              | 379201                            | 7.9                                        | 22.1                           | 23.3                            | 53.4              |
| Colon and rectum cancer              | Middle SDI      | 199162               | 347697  | 218518                              | 273508                            | 9.7                                        | 27.6                           | 37.3                            | 74.6              |
| Colon and rectum cancer              | Low-middle SDI  | 72086                | 110706  | 85611                               | 96920                             | 18.8                                       | 15.7                           | 19.1                            | 53.6              |
| Colon and rectum cancer              | Low SDI         | 38950                | 59355   | 48352                               | 53753                             | 24.1                                       | 13.9                           | 14.4                            | 52.4              |
| Liver cancer                         | Global          | 704940               | 953076  | 795785                              | 912005                            | 12.9                                       | 16.5                           | 5.8                             | 35.2              |
| Liver cancer                         | High SDI        | 157164               | 189099  | 166537                              | 190301                            | 6                                          | 15.1                           | -0.8                            | 20.3              |
| Liver cancer                         | High-middle SDI | 197377               | 287107  | 212979                              | 252662                            | 7.9                                        | 20.1                           | 17.5                            | 45.5              |
| Liver cancer                         | Middle SDI      | 244715               | 340837  | 268499                              | 330523                            | 9.7                                        | 25.3                           | 4.2                             | 39.3              |
| Liver cancer                         | Low-middle SDI  | 65251                | 84823   | 77493                               | 86964                             | 18.8                                       | 14.5                           | -3.3                            | 30                |
| Liver cancer                         | Low SDI         | 33899                | 42099   | 42081                               | 46399                             | 24.1                                       | 12.7                           | -12.7                           | 24.2              |
| Gallbladder and biliary tract cancer | Global          | 158681               | 210878  | 179129                              | 212162                            | 12.9                                       | 20.8                           | -0.8                            | 32.9              |

| Cause                                | Location        | Incidence cases, No. |         | Expected incidence cases, 2017, No. |                                   | Change in incidence cases, 2007 to 2017, % |                                |                                 | Overall change, % |
|--------------------------------------|-----------------|----------------------|---------|-------------------------------------|-----------------------------------|--------------------------------------------|--------------------------------|---------------------------------|-------------------|
|                                      |                 | 2007                 | 2017    | Given population growth alone       | Given population growth and aging | Due to population growth                   | Due to change in age structure | Due to change in incidence rate |                   |
| Gallbladder and biliary tract cancer | High SDI        | 73621                | 94448   | 78011                               | 92351                             | 6                                          | 19.5                           | 2.8                             | 28.3              |
| Gallbladder and biliary tract cancer | High-middle SDI | 28220                | 36134   | 30450                               | 37228                             | 7.9                                        | 24                             | -3.9                            | 28                |
| Gallbladder and biliary tract cancer | Middle SDI      | 28144                | 40177   | 30879                               | 39348                             | 9.7                                        | 30.1                           | 2.9                             | 42.8              |
| Gallbladder and biliary tract cancer | Low-middle SDI  | 18012                | 24819   | 21391                               | 24320                             | 18.8                                       | 16.3                           | 2.8                             | 37.8              |
| Gallbladder and biliary tract cancer | Low SDI         | 10236                | 14664   | 12707                               | 14194                             | 24.1                                       | 14.5                           | 4.6                             | 43.3              |
| Pancreatic cancer                    | Global          | 321292               | 447665  | 362696                              | 427701                            | 12.9                                       | 20.2                           | 6.2                             | 39.3              |
| Pancreatic cancer                    | High SDI        | 165383               | 210439  | 175246                              | 204888                            | 6                                          | 17.9                           | 3.4                             | 27.2              |
| Pancreatic cancer                    | High-middle SDI | 74693                | 104712  | 80598                               | 97815                             | 7.9                                        | 23.1                           | 9.2                             | 40.2              |
| Pancreatic cancer                    | Middle SDI      | 47477                | 77874   | 52091                               | 66062                             | 9.7                                        | 29.4                           | 24.9                            | 64                |
| Pancreatic cancer                    | Low-middle SDI  | 22777                | 36617   | 27050                               | 30735                             | 18.8                                       | 16.2                           | 25.8                            | 60.8              |
| Pancreatic cancer                    | Low SDI         | 9955                 | 16380   | 12357                               | 13786                             | 24.1                                       | 14.4                           | 26                              | 64.5              |
| Larynx cancer                        | Global          | 159493               | 210606  | 180047                              | 208823                            | 12.9                                       | 18                             | 1.1                             | 32                |
| Larynx cancer                        | High SDI        | 50931                | 57765   | 53968                               | 61285                             | 6                                          | 14.4                           | -6.9                            | 13.4              |
| Larynx cancer                        | High-middle SDI | 36665                | 49547   | 39563                               | 47810                             | 7.9                                        | 22.5                           | 4.7                             | 35.1              |
| Larynx cancer                        | Middle SDI      | 30851                | 49053   | 33848                               | 42583                             | 9.7                                        | 28.3                           | 21                              | 59                |
| Larynx cancer                        | Low-middle SDI  | 24882                | 32596   | 29550                               | 33340                             | 18.8                                       | 15.2                           | -3                              | 31                |
| Larynx cancer                        | Low SDI         | 15696                | 20825   | 19485                               | 21540                             | 24.1                                       | 13.1                           | -4.6                            | 32.7              |
| Tracheal, bronchus, and lung cancer  | Global          | 1585124              | 2163132 | 1789397                             | 2092386                           | 12.9                                       | 19.1                           | 4.5                             | 36.5              |
| Tracheal, bronchus, and lung cancer  | High SDI        | 683416               | 797425  | 724175                              | 836522                            | 6                                          | 16.4                           | -5.7                            | 16.7              |
| Tracheal, bronchus, and lung cancer  | High-middle SDI | 422818               | 622560  | 456241                              | 552207                            | 7.9                                        | 22.7                           | 16.6                            | 47.2              |

| Cause                               | Location        | Incidence cases, No. |         | Expected incidence cases, 2017, No. |                                   | Change in incidence cases, 2007 to 2017, % |                                |                                 | Overall change, % |
|-------------------------------------|-----------------|----------------------|---------|-------------------------------------|-----------------------------------|--------------------------------------------|--------------------------------|---------------------------------|-------------------|
|                                     |                 | 2007                 | 2017    | Given population growth alone       | Given population growth and aging | Due to population growth                   | Due to change in age structure | Due to change in incidence rate |                   |
| Tracheal, bronchus, and lung cancer | Middle SDI      | 333723               | 538927  | 366157                              | 463901                            | 9.7                                        | 29.3                           | 22.5                            | 61.5              |
| Tracheal, bronchus, and lung cancer | Low-middle SDI  | 90553                | 121201  | 107544                              | 121777                            | 18.8                                       | 15.7                           | -0.6                            | 33.8              |
| Tracheal, bronchus, and lung cancer | Low SDI         | 45925                | 68425   | 57011                               | 63337                             | 24.1                                       | 13.8                           | 11.1                            | 49                |
| Malignant skin melanoma             | Global          | 233617               | 308684  | 263723                              | 297053                            | 12.9                                       | 14.3                           | 5                               | 32.1              |
| Malignant skin melanoma             | High SDI        | 183371               | 234273  | 194307                              | 211575                            | 6                                          | 9.4                            | 12.4                            | 27.8              |
| Malignant skin melanoma             | High-middle SDI | 32911                | 46195   | 35512                               | 40481                             | 7.9                                        | 15.1                           | 17.4                            | 40.4              |
| Malignant skin melanoma             | Middle SDI      | 10324                | 17562   | 11327                               | 13150                             | 9.7                                        | 17.7                           | 42.7                            | 70.1              |
| Malignant skin melanoma             | Low-middle SDI  | 4328                 | 6700    | 5139                                | 5632                              | 18.8                                       | 11.4                           | 24.7                            | 54.8              |
| Malignant skin melanoma             | Low SDI         | 2433                 | 3530    | 3020                                | 3287                              | 24.1                                       | 11                             | 10                              | 45.1              |
| Non-melanoma skin cancer            | Global          | 5772527              | 7663589 | 6516426                             | 7657115                           | 12.9                                       | 19.8                           | 0.1                             | 32.8              |
| Non-melanoma skin cancer            | High SDI        | 4709887              | 6052504 | 4990784                             | 5734870                           | 6                                          | 15.8                           | 6.7                             | 28.5              |
| Non-melanoma skin cancer            | High-middle SDI | 420157               | 602803  | 453370                              | 545838                            | 7.9                                        | 22                             | 13.6                            | 43.5              |
| Non-melanoma skin cancer            | Middle SDI      | 451039               | 692756  | 494874                              | 610992                            | 9.7                                        | 25.7                           | 18.1                            | 53.6              |
| Non-melanoma skin cancer            | Low-middle SDI  | 124305               | 221372  | 147628                              | 164900                            | 18.8                                       | 13.9                           | 45.4                            | 78.1              |
| Non-melanoma skin cancer            | Low SDI         | 63845                | 88481   | 79257                               | 85848                             | 24.1                                       | 10.3                           | 4.1                             | 38.6              |
| Breast cancer                       | Global          | 1450335              | 1960682 | 1637237                             | 1856152                           | 12.9                                       | 15.1                           | 7.2                             | 35.2              |
| Breast cancer                       | High SDI        | 696552               | 781346  | 738094                              | 819742                            | 6                                          | 11.7                           | -5.5                            | 12.2              |
| Breast cancer                       | High-middle SDI | 301728               | 435967  | 325579                              | 379636                            | 7.9                                        | 17.9                           | 18.7                            | 44.5              |
| Breast cancer                       | Middle SDI      | 254012               | 418855  | 278698                              | 329932                            | 9.7                                        | 20.2                           | 35                              | 64.9              |
| Breast cancer                       | Low-middle SDI  | 140459               | 222633  | 166814                              | 184239                            | 18.8                                       | 12.4                           | 27.3                            | 58.5              |
| Breast cancer                       | Low SDI         | 53064                | 94422   | 65873                               | 71924                             | 24.1                                       | 11.4                           | 42.4                            | 77.9              |
| Cervical cancer                     | Global          | 505740               | 601186  | 570913                              | 617377                            | 12.9                                       | 9.2                            | -3.2                            | 18.9              |
| Cervical cancer                     | High SDI        | 73104                | 74634   | 77464                               | 81638                             | 6                                          | 5.7                            | -9.6                            | 2.1               |
| Cervical cancer                     | High-middle SDI | 91379                | 102547  | 98602                               | 110116                            | 7.9                                        | 12.6                           | -8.3                            | 12.2              |

| Cause             | Location        | Incidence cases, No. |         | Expected incidence cases, 2017, No. |                                   | Change in incidence cases, 2007 to 2017, % |                                |                                 | Overall change, % |
|-------------------|-----------------|----------------------|---------|-------------------------------------|-----------------------------------|--------------------------------------------|--------------------------------|---------------------------------|-------------------|
|                   |                 | 2007                 | 2017    | Given population growth alone       | Given population growth and aging | Due to population growth                   | Due to change in age structure | Due to change in incidence rate |                   |
| Cervical cancer   | Middle SDI      | 150996               | 186320  | 165671                              | 188104                            | 9.7                                        | 14.9                           | -1.2                            | 23.4              |
| Cervical cancer   | Low-middle SDI  | 104512               | 129180  | 124122                              | 134864                            | 18.8                                       | 10.3                           | -5.4                            | 23.6              |
| Cervical cancer   | Low SDI         | 83984                | 106167  | 104257                              | 112493                            | 24.1                                       | 9.8                            | -7.5                            | 26.4              |
| Uterine cancer    | Global          | 299012               | 406793  | 337545                              | 389361                            | 12.9                                       | 17.3                           | 5.8                             | 36                |
| Uterine cancer    | High SDI        | 147048               | 197424  | 155818                              | 176391                            | 6                                          | 14                             | 14.3                            | 34.3              |
| Uterine cancer    | High-middle SDI | 71130                | 91360   | 76753                               | 91323                             | 7.9                                        | 20.5                           | 0.1                             | 28.4              |
| Uterine cancer    | Middle SDI      | 53020                | 75409   | 58172                               | 70595                             | 9.7                                        | 23.4                           | 9.1                             | 42.2              |
| Uterine cancer    | Low-middle SDI  | 19596                | 30002   | 23273                               | 26092                             | 18.8                                       | 14.4                           | 19.9                            | 53.1              |
| Uterine cancer    | Low SDI         | 7052                 | 11118   | 8753                                | 9652                              | 24.1                                       | 12.7                           | 20.8                            | 57.7              |
| Ovarian cancer    | Global          | 221787               | 286127  | 250368                              | 281462                            | 12.9                                       | 14                             | 2.1                             | 29                |
| Ovarian cancer    | High SDI        | 87410                | 91486   | 92622                               | 103311                            | 6                                          | 12.2                           | -13.5                           | 4.7               |
| Ovarian cancer    | High-middle SDI | 48609                | 59262   | 52452                               | 60431                             | 7.9                                        | 16.4                           | -2.4                            | 21.9              |
| Ovarian cancer    | Middle SDI      | 43838                | 67615   | 48098                               | 56055                             | 9.7                                        | 18.1                           | 26.4                            | 54.2              |
| Ovarian cancer    | Low-middle SDI  | 29822                | 47695   | 35418                               | 38704                             | 18.8                                       | 11                             | 30.1                            | 59.9              |
| Ovarian cancer    | Low SDI         | 11541                | 19192   | 14327                               | 15580                             | 24.1                                       | 10.9                           | 31.3                            | 66.3              |
| Prostate cancer   | Global          | 939980               | 1334315 | 1061114                             | 1258544                           | 12.9                                       | 21                             | 8.1                             | 42                |
| Prostate cancer   | High SDI        | 587815               | 743876  | 622872                              | 730191                            | 6                                          | 18.3                           | 2.3                             | 26.5              |
| Prostate cancer   | High-middle SDI | 142375               | 236637  | 153629                              | 188805                            | 7.9                                        | 24.7                           | 33.6                            | 66.2              |
| Prostate cancer   | Middle SDI      | 123479               | 217246  | 135479                              | 175883                            | 9.7                                        | 32.7                           | 33.5                            | 75.9              |
| Prostate cancer   | Low-middle SDI  | 58872                | 93572   | 69918                               | 80936                             | 18.8                                       | 18.7                           | 21.5                            | 58.9              |
| Prostate cancer   | Low SDI         | 25314                | 39260   | 31424                               | 35835                             | 24.1                                       | 17.4                           | 13.5                            | 55.1              |
| Testicular cancer | Global          | 58427                | 71348   | 65956                               | 66463                             | 12.9                                       | 0.9                            | 8.4                             | 22.1              |
| Testicular cancer | High SDI        | 33186                | 34764   | 35165                               | 33725                             | 6                                          | -4.3                           | 3.1                             | 4.8               |
| Testicular cancer | High-middle SDI | 12514                | 16930   | 13502                               | 13457                             | 7.9                                        | -0.4                           | 27.8                            | 35.3              |
| Testicular cancer | Middle SDI      | 8338                 | 13844   | 9148                                | 9123                              | 9.7                                        | -0.3                           | 56.6                            | 66                |
| Testicular cancer | Low-middle SDI  | 3387                 | 4464    | 4023                                | 4157                              | 18.8                                       | 4                              | 9                               | 31.8              |

| Cause                                   | Location        | Incidence cases, No. |        | Expected incidence cases, 2017, No. |                                   | Change in incidence cases, 2007 to 2017, % |                                |                                 | Overall change, % |
|-----------------------------------------|-----------------|----------------------|--------|-------------------------------------|-----------------------------------|--------------------------------------------|--------------------------------|---------------------------------|-------------------|
|                                         |                 | 2007                 | 2017   | Given population growth alone       | Given population growth and aging | Due to population growth                   | Due to change in age structure | Due to change in incidence rate |                   |
| Testicular cancer                       | Low SDI         | 917                  | 1208   | 1138                                | 1195                              | 24.1                                       | 6.3                            | 1.3                             | 31.7              |
| Kidney cancer                           | Global          | 314508               | 393043 | 355038                              | 401941                            | 12.9                                       | 14.9                           | -2.8                            | 25                |
| Kidney cancer                           | High SDI        | 150974               | 176880 | 159977                              | 180428                            | 6                                          | 13.5                           | -2.4                            | 17.2              |
| Kidney cancer                           | High-middle SDI | 72888                | 89416  | 78649                               | 92066                             | 7.9                                        | 18.4                           | -3.6                            | 22.7              |
| Kidney cancer                           | Middle SDI      | 48644                | 68749  | 53371                               | 62527                             | 9.7                                        | 18.8                           | 12.8                            | 41.3              |
| Kidney cancer                           | Low-middle SDI  | 26047                | 36589  | 30934                               | 32980                             | 18.8                                       | 7.9                            | 13.9                            | 40.5              |
| Kidney cancer                           | Low SDI         | 15168                | 20346  | 18829                               | 19064                             | 24.1                                       | 1.6                            | 8.4                             | 34.1              |
| Bladder cancer                          | Global          | 357786               | 473800 | 403893                              | 476186                            | 12.9                                       | 20.2                           | -0.7                            | 32.4              |
| Bladder cancer                          | High SDI        | 192602               | 233055 | 204088                              | 238898                            | 6                                          | 18.1                           | -3                              | 21                |
| Bladder cancer                          | High-middle SDI | 77922                | 105718 | 84081                               | 102008                            | 7.9                                        | 23                             | 4.8                             | 35.7              |
| Bladder cancer                          | Middle SDI      | 45744                | 72734  | 50190                               | 63468                             | 9.7                                        | 29                             | 20.3                            | 59                |
| Bladder cancer                          | Low-middle SDI  | 29174                | 43951  | 34648                               | 39252                             | 18.8                                       | 15.8                           | 16.1                            | 50.7              |
| Bladder cancer                          | Low SDI         | 11346                | 16777  | 14085                               | 15802                             | 24.1                                       | 15.1                           | 8.6                             | 47.9              |
| Brain and central nervous system cancer | Global          | 284977               | 405218 | 321701                              | 344801                            | 12.9                                       | 8.1                            | 21.2                            | 42.2              |
| Brain and central nervous system cancer | High SDI        | 97970                | 127159 | 103813                              | 110907                            | 6                                          | 7.2                            | 16.6                            | 29.8              |
| Brain and central nervous system cancer | High-middle SDI | 70200                | 107805 | 75749                               | 82600                             | 7.9                                        | 9.8                            | 35.9                            | 53.6              |
| Brain and central nervous system cancer | Middle SDI      | 61091                | 98199  | 67028                               | 73997                             | 9.7                                        | 11.4                           | 39.6                            | 60.7              |
| Brain and central nervous system cancer | Low-middle SDI  | 33057                | 43442  | 39259                               | 40667                             | 18.8                                       | 4.3                            | 8.4                             | 31.4              |
| Brain and central nervous system cancer | Low SDI         | 21378                | 26398  | 26538                               | 26784                             | 24.1                                       | 1.1                            | -1.8                            | 23.5              |
| Thyroid cancer                          | Global          | 185433               | 255489 | 209329                              | 229100                            | 12.9                                       | 10.7                           | 14.2                            | 37.8              |
| Thyroid cancer                          | High SDI        | 79748                | 88070  | 84503                               | 90190                             | 6                                          | 7.1                            | -2.7                            | 10.4              |

| Cause                | Location        | Incidence cases, No. |        | Expected incidence cases, 2017, No. |                                   | Change in incidence cases, 2007 to 2017, % |                                |                                 | Overall change, % |
|----------------------|-----------------|----------------------|--------|-------------------------------------|-----------------------------------|--------------------------------------------|--------------------------------|---------------------------------|-------------------|
|                      |                 | 2007                 | 2017   | Given population growth alone       | Given population growth and aging | Due to population growth                   | Due to change in age structure | Due to change in incidence rate |                   |
| Thyroid cancer       | High-middle SDI | 39200                | 58681  | 42298                               | 47428                             | 7.9                                        | 13.1                           | 28.7                            | 49.7              |
| Thyroid cancer       | Middle SDI      | 36064                | 60932  | 39568                               | 45061                             | 9.7                                        | 15.2                           | 44                              | 69                |
| Thyroid cancer       | Low-middle SDI  | 19871                | 31536  | 23599                               | 25207                             | 18.8                                       | 8.1                            | 31.8                            | 58.7              |
| Thyroid cancer       | Low SDI         | 10040                | 15404  | 12464                               | 13304                             | 24.1                                       | 8.4                            | 20.9                            | 53.4              |
| Mesothelioma         | Global          | 27918                | 34615  | 31515                               | 36409                             | 12.9                                       | 17.5                           | -6.4                            | 24                |
| Mesothelioma         | High SDI        | 15951                | 18960  | 16902                               | 19562                             | 6                                          | 16.7                           | -3.8                            | 18.9              |
| Mesothelioma         | High-middle SDI | 4435                 | 5381   | 4785                                | 5627                              | 7.9                                        | 19                             | -5.5                            | 21.3              |
| Mesothelioma         | Middle SDI      | 3766                 | 5143   | 4132                                | 4961                              | 9.7                                        | 22                             | 4.8                             | 36.6              |
| Mesothelioma         | Low-middle SDI  | 2504                 | 3322   | 2973                                | 3296                              | 18.8                                       | 12.9                           | 1                               | 32.7              |
| Mesothelioma         | Low SDI         | 1211                 | 1736   | 1502                                | 1646                              | 24.1                                       | 11.9                           | 7.4                             | 43.4              |
| Hodgkin lymphoma     | Global          | 87794                | 101133 | 99108                               | 102166                            | 12.9                                       | 3.5                            | -1.2                            | 15.2              |
| Hodgkin lymphoma     | High SDI        | 34464                | 34961  | 36519                               | 36460                             | 6                                          | -0.2                           | -4.4                            | 1.4               |
| Hodgkin lymphoma     | High-middle SDI | 20497                | 26655  | 22116                               | 22269                             | 7.9                                        | 0.7                            | 21.4                            | 30                |
| Hodgkin lymphoma     | Middle SDI      | 11575                | 16529  | 12699                               | 13590                             | 9.7                                        | 7.7                            | 25.4                            | 42.8              |
| Hodgkin lymphoma     | Low-middle SDI  | 13682                | 15178  | 16249                               | 16719                             | 18.8                                       | 3.4                            | -11.3                           | 10.9              |
| Hodgkin lymphoma     | Low SDI         | 7347                 | 7447   | 9121                                | 9441                              | 24.1                                       | 4.4                            | -27.1                           | 1.4               |
| Non-Hodgkin lymphoma | Global          | 351576               | 487964 | 396883                              | 448602                            | 12.9                                       | 14.7                           | 11.2                            | 38.8              |
| Non-Hodgkin lymphoma | High SDI        | 191484               | 237182 | 202903                              | 228860                            | 6                                          | 13.6                           | 4.3                             | 23.9              |
| Non-Hodgkin lymphoma | High-middle SDI | 54133                | 91503  | 58411                               | 66875                             | 7.9                                        | 15.6                           | 45.5                            | 69                |
| Non-Hodgkin lymphoma | Middle SDI      | 48789                | 81774  | 53530                               | 62603                             | 9.7                                        | 18.6                           | 39.3                            | 67.6              |
| Non-Hodgkin lymphoma | Low-middle SDI  | 34336                | 46916  | 40778                               | 43519                             | 18.8                                       | 8                              | 9.9                             | 36.6              |
| Non-Hodgkin lymphoma | Low SDI         | 21959                | 28901  | 27259                               | 28445                             | 24.1                                       | 5.4                            | 2.1                             | 31.6              |
| Multiple myeloma     | Global          | 110991               | 152746 | 125294                              | 146692                            | 12.9                                       | 19.3                           | 5.5                             | 37.6              |
| Multiple myeloma     | High SDI        | 64888                | 81220  | 68757                               | 79411                             | 6                                          | 16.4                           | 2.8                             | 25.2              |
| Multiple myeloma     | High-middle SDI | 18038                | 27453  | 19463                               | 23436                             | 7.9                                        | 22                             | 22.3                            | 52.2              |
| Multiple myeloma     | Middle SDI      | 14511                | 23630  | 15920                               | 19865                             | 9.7                                        | 27.2                           | 25.9                            | 62.8              |

| Cause                     | Location        | Incidence cases, No. |        | Expected incidence cases, 2017, No. |                                   | Change in incidence cases, 2007 to 2017, % |                                |                                 | Overall change, % |
|---------------------------|-----------------|----------------------|--------|-------------------------------------|-----------------------------------|--------------------------------------------|--------------------------------|---------------------------------|-------------------|
|                           |                 | 2007                 | 2017   | Given population growth alone       | Given population growth and aging | Due to population growth                   | Due to change in age structure | Due to change in incidence rate |                   |
| Multiple myeloma          | Low-middle SDI  | 8558                 | 12879  | 10164                               | 11470                             | 18.8                                       | 15.3                           | 16.5                            | 50.5              |
| Multiple myeloma          | Low SDI         | 4737                 | 7129   | 5880                                | 6532                              | 24.1                                       | 13.8                           | 12.6                            | 50.5              |
| Acute lymphoid leukemia   | Global          | 83156                | 107561 | 93872                               | 93250                             | 12.9                                       | -0.7                           | 17.2                            | 29.3              |
| Acute lymphoid leukemia   | High SDI        | 16487                | 16688  | 17469                               | 17423                             | 6                                          | -0.3                           | -4.5                            | 1.2               |
| Acute lymphoid leukemia   | High-middle SDI | 19943                | 31055  | 21519                               | 21699                             | 7.9                                        | 0.9                            | 46.9                            | 55.7              |
| Acute lymphoid leukemia   | Middle SDI      | 25199                | 35502  | 27648                               | 27541                             | 9.7                                        | -0.4                           | 31.6                            | 40.9              |
| Acute lymphoid leukemia   | Low-middle SDI  | 12351                | 14036  | 14668                               | 14312                             | 18.8                                       | -2.9                           | -2.2                            | 13.6              |
| Acute lymphoid leukemia   | Low SDI         | 8775                 | 9557   | 10892                               | 10429                             | 24.1                                       | -5.3                           | -9.9                            | 8.9               |
| Chronic lymphoid leukemia | Global          | 81414                | 114416 | 91905                               | 107695                            | 12.9                                       | 19.4                           | 8.3                             | 40.5              |
| Chronic lymphoid leukemia | High SDI        | 54984                | 63632  | 58262                               | 67841                             | 6                                          | 17.4                           | -7.7                            | 15.7              |
| Chronic lymphoid leukemia | High-middle SDI | 15401                | 27373  | 16618                               | 19518                             | 7.9                                        | 18.8                           | 51                              | 77.7              |
| Chronic lymphoid leukemia | Middle SDI      | 7739                 | 17828  | 8491                                | 10014                             | 9.7                                        | 19.7                           | 101                             | 130.4             |
| Chronic lymphoid leukemia | Low-middle SDI  | 1942                 | 3343   | 2306                                | 2591                              | 18.8                                       | 14.7                           | 38.7                            | 72.1              |
| Chronic lymphoid leukemia | Low SDI         | 1110                 | 1710   | 1378                                | 1539                              | 24.1                                       | 14.6                           | 15.3                            | 54                |
| Acute myeloid leukemia    | Global          | 113481               | 139828 | 128105                              | 138875                            | 12.9                                       | 9.5                            | 0.8                             | 23.2              |
| Acute myeloid leukemia    | High SDI        | 44442                | 52043  | 47092                               | 52457                             | 6                                          | 12.1                           | -0.9                            | 17.1              |
| Acute myeloid leukemia    | High-middle SDI | 20337                | 23309  | 21944                               | 23685                             | 7.9                                        | 8.6                            | -1.9                            | 14.6              |
| Acute myeloid leukemia    | Middle SDI      | 21525                | 28401  | 23617                               | 25595                             | 9.7                                        | 9.2                            | 13                              | 31.9              |
| Acute myeloid leukemia    | Low-middle SDI  | 15729                | 21049  | 18680                               | 19265                             | 18.8                                       | 3.7                            | 11.3                            | 33.8              |
| Acute myeloid leukemia    | Low SDI         | 11136                | 14648  | 13824                               | 14013                             | 24.1                                       | 1.7                            | 5.7                             | 31.5              |
| Chronic myeloid leukemia  | Global          | 38185                | 39845  | 43105                               | 48162                             | 12.9                                       | 13.2                           | -21.8                           | 4.3               |
| Chronic myeloid leukemia  | High SDI        | 14771                | 12994  | 15651                               | 17550                             | 6                                          | 12.9                           | -30.8                           | -12               |
| Chronic myeloid leukemia  | High-middle SDI | 7021                 | 6843   | 7575                                | 8531                              | 7.9                                        | 13.6                           | -24.1                           | -2.5              |
| Chronic myeloid leukemia  | Middle SDI      | 6623                 | 8118   | 7266                                | 8366                              | 9.7                                        | 16.6                           | -3.8                            | 22.6              |
| Chronic myeloid leukemia  | Low-middle SDI  | 5094                 | 6159   | 6050                                | 6615                              | 18.8                                       | 11.1                           | -9                              | 20.9              |
| Chronic myeloid leukemia  | Low SDI         | 4582                 | 5633   | 5687                                | 6174                              | 24.1                                       | 10.6                           | -11.8                           | 22.9              |

| Cause                     | Location        | Incidence cases, No. |        | Expected incidence cases, 2017, No. |                                   | Change in incidence cases, 2007 to 2017, % |                                |                                 | Overall change, % |
|---------------------------|-----------------|----------------------|--------|-------------------------------------|-----------------------------------|--------------------------------------------|--------------------------------|---------------------------------|-------------------|
|                           |                 | 2007                 | 2017   | Given population growth alone       | Given population growth and aging | Due to population growth                   | Due to change in age structure | Due to change in incidence rate |                   |
| Other leukemia            | Global          | 226052               | 246145 | 255183                              | 269995                            | 12.9                                       | 6.6                            | -10.6                           | 8.9               |
| Other leukemia            | High SDI        | 41432                | 45487  | 43902                               | 49952                             | 6                                          | 14.6                           | -10.8                           | 9.8               |
| Other leukemia            | High-middle SDI | 68357                | 73222  | 73760                               | 78920                             | 7.9                                        | 7.5                            | -8.3                            | 7.1               |
| Other leukemia            | Middle SDI      | 71780                | 79705  | 78756                               | 83635                             | 9.7                                        | 6.8                            | -5.5                            | 11                |
| Other leukemia            | Low-middle SDI  | 28595                | 30982  | 33960                               | 34751                             | 18.8                                       | 2.8                            | -13.2                           | 8.3               |
| Other leukemia            | Low SDI         | 14076                | 14789  | 17474                               | 17343                             | 24.1                                       | -0.9                           | -18.1                           | 5.1               |
| Other malignant neoplasms | Global          | 484500               | 715547 | 546937                              | 597874                            | 12.9                                       | 10.5                           | 24.3                            | 47.7              |
| Other malignant neoplasms | High SDI        | 165713               | 208759 | 175596                              | 192270                            | 6                                          | 10.1                           | 10                              | 26                |
| Other malignant neoplasms | High-middle SDI | 127378               | 205510 | 137447                              | 153445                            | 7.9                                        | 12.6                           | 40.9                            | 61.3              |
| Other malignant neoplasms | Middle SDI      | 89029                | 164056 | 97681                               | 111638                            | 9.7                                        | 15.7                           | 58.9                            | 84.3              |
| Other malignant neoplasms | Low-middle SDI  | 59487                | 80112  | 70648                               | 74054                             | 18.8                                       | 5.7                            | 10.2                            | 34.7              |
| Other malignant neoplasms | Low SDI         | 40819                | 52946  | 50672                               | 52045                             | 24.1                                       | 3.4                            | 2.2                             | 29.7              |



eTable 15: Contribution of YLDs and YLLs to DALYs by cancer, global, both sexes, 2017

| Cause                                              | Contribution YLLs (%) | Contribution YLDs (%) |
|----------------------------------------------------|-----------------------|-----------------------|
| All Malignant Neoplasms                            | 97                    | 3                     |
| Lip and Oral Cavity Cancer                         | 97                    | 3                     |
| Nasopharynx Cancer                                 | 97                    | 3                     |
| Other Pharynx Cancer                               | 98                    | 2                     |
| Esophageal Cancer                                  | 99                    | 1                     |
| Stomach Cancer                                     | 98                    | 2                     |
| Colon and Rectum Cancer                            | 95                    | 5                     |
| Liver Cancer                                       | 99                    | 1                     |
| Gallbladder and Biliary Tract Cancer               | 99                    | 1                     |
| Pancreatic Cancer                                  | 99                    | 1                     |
| Larynx Cancer                                      | 97                    | 3                     |
| Tracheal, Bronchus, and Lung Cancer                | 99                    | 1                     |
| Malignant Skin Melanoma                            | 91                    | 9                     |
| Non-Melanoma Skin Cancer                           | 93                    | 7                     |
| Non-Melanoma Skin Cancer (Squamous-Cell Carcinoma) | 93                    | 7                     |
| Non-Melanoma Skin Cancer (Basal-Cell Carcinoma)    | 0                     | 100                   |
| Breast Cancer                                      | 93                    | 7                     |
| Cervical Cancer                                    | 96                    | 4                     |
| Uterine Cancer                                     | 90                    | 10                    |
| Ovarian Cancer                                     | 96                    | 4                     |
| Prostate Cancer                                    | 88                    | 12                    |
| Testicular Cancer                                  | 90                    | 10                    |
| Kidney Cancer                                      | 96                    | 4                     |
| Bladder Cancer                                     | 93                    | 7                     |
| Brain and Nervous System Cancer                    | 98                    | 2                     |
| Thyroid Cancer                                     | 88                    | 12                    |
| Mesothelioma                                       | 98                    | 2                     |
| Hodgkin Lymphoma                                   | 96                    | 4                     |
| Non-Hodgkin Lymphoma                               | 97                    | 3                     |
| Multiple Myeloma                                   | 96                    | 4                     |
| Acute Lymphoid Leukemia                            | 98                    | 2                     |
| Chronic Lymphoid Leukemia                          | 89                    | 11                    |

| Cause                     | Contribution YLLs (%) | Contribution YLDs (%) |
|---------------------------|-----------------------|-----------------------|
| Acute Myeloid Leukemia    | 99                    | 1                     |
| Chronic Myeloid Leukemia  | 98                    | 2                     |
| Other Leukemia            | 98                    | 2                     |
| Other Malignant Neoplasms | 94                    | 6                     |

*eTable 16: Probability of developing cancer within selected age intervals, global, and by SDI quintile, by sex, 2007-2017 in % (odds)*

| Location/SDI Quintile | Cancer                               | Birth to age 49     |                     | Age 50 to 59        |                     | Age 60 to 69        |                     | Age 70 to 79        |                     | Age 30 to 70       |                     | Birth to age 79    |                     |
|-----------------------|--------------------------------------|---------------------|---------------------|---------------------|---------------------|---------------------|---------------------|---------------------|---------------------|--------------------|---------------------|--------------------|---------------------|
|                       |                                      | Male                | Female              | Male                | Female              | Male                | Female              | Male                | Female              | Male               | Female              | Male               | Female              |
| Global                | Neoplasms                            | 3.18<br>(1 in 31)   | 4.55<br>(1 in 22)   | 5.61<br>(1 in 18)   | 5.18<br>(1 in 19)   | 13.79<br>(1 in 7)   | 9.02<br>(1 in 11)   | 22.60<br>(1 in 4)   | 13.08<br>(1 in 8)   | 38.62<br>(1 in 3)  | 27.90<br>(1 in 4)   | 39.02<br>(1 in 3)  | 28.43<br>(1 in 4)   |
| Global                | Lip and oral cavity cancer           | 0.10<br>(1 in 1025) | 0.08<br>(1 in 1298) | 0.16<br>(1 in 642)  | 0.08<br>(1 in 1307) | 0.25<br>(1 in 396)  | 0.12<br>(1 in 845)  | 0.32<br>(1 in 316)  | 0.16<br>(1 in 611)  | 0.81<br>(1 in 123) | 0.42<br>(1 in 238)  | 0.82<br>(1 in 122) | 0.43<br>(1 in 230)  |
| Global                | Nasopharynx cancer                   | 0.06<br>(1 in 1543) | 0.03<br>(1 in 3941) | 0.05<br>(1 in 1952) | 0.02<br>(1 in 6354) | 0.06<br>(1 in 1568) | 0.02<br>(1 in 5891) | 0.06<br>(1 in 1757) | 0.02<br>(1 in 5737) | 0.23<br>(1 in 439) | 0.07<br>(1 in 1425) | 0.24<br>(1 in 423) | 0.08<br>(1 in 1325) |
| Global                | Other pharynx cancer                 | 0.04<br>(1 in 2292) | 0.02<br>(1 in 4827) | 0.11<br>(1 in 925)  | 0.03<br>(1 in 3062) | 0.16<br>(1 in 615)  | 0.05<br>(1 in 2089) | 0.15<br>(1 in 680)  | 0.05<br>(1 in 2084) | 0.46<br>(1 in 218) | 0.15<br>(1 in 683)  | 0.46<br>(1 in 217) | 0.15<br>(1 in 670)  |
| Global                | Esophageal cancer                    | 0.06<br>(1 in 1787) | 0.03<br>(1 in 3825) | 0.17<br>(1 in 586)  | 0.05<br>(1 in 1843) | 0.43<br>(1 in 232)  | 0.14<br>(1 in 721)  | 0.64<br>(1 in 157)  | 0.25<br>(1 in 396)  | 1.29<br>(1 in 78)  | 0.47<br>(1 in 213)  | 1.29<br>(1 in 78)  | 0.47<br>(1 in 212)  |
| Global                | Stomach cancer                       | 0.15<br>(1 in 654)  | 0.12<br>(1 in 851)  | 0.35<br>(1 in 282)  | 0.16<br>(1 in 632)  | 0.99<br>(1 in 101)  | 0.36<br>(1 in 275)  | 1.58<br>(1 in 63)   | 0.65<br>(1 in 154)  | 3.04<br>(1 in 33)  | 1.27<br>(1 in 79)   | 3.05<br>(1 in 33)  | 1.28<br>(1 in 78)   |
| Global                | Colon and rectum cancer              | 0.20<br>(1 in 492)  | 0.17<br>(1 in 581)  | 0.44<br>(1 in 226)  | 0.32<br>(1 in 308)  | 1.16<br>(1 in 86)   | 0.71<br>(1 in 140)  | 2.04<br>(1 in 49)   | 1.30<br>(1 in 77)   | 3.79<br>(1 in 26)  | 2.48<br>(1 in 40)   | 3.80<br>(1 in 26)  | 2.49<br>(1 in 40)   |
| Global                | Liver cancer                         | 0.26<br>(1 in 378)  | 0.07<br>(1 in 1523) | 0.43<br>(1 in 232)  | 0.11<br>(1 in 881)  | 0.78<br>(1 in 129)  | 0.26<br>(1 in 385)  | 0.94<br>(1 in 106)  | 0.41<br>(1 in 245)  | 2.38<br>(1 in 42)  | 0.84<br>(1 in 120)  | 2.40<br>(1 in 42)  | 0.84<br>(1 in 118)  |
| Global                | Gallbladder and biliary tract cancer | 0.01<br>(1 in 8176) | 0.02<br>(1 in 6110) | 0.03<br>(1 in 3169) | 0.04<br>(1 in 2483) | 0.10<br>(1 in 1035) | 0.11<br>(1 in 952)  | 0.20<br>(1 in 506)  | 0.20<br>(1 in 503)  | 0.34<br>(1 in 297) | 0.36<br>(1 in 278)  | 0.34<br>(1 in 296) | 0.36<br>(1 in 278)  |

| Location/SDI Quintile | Cancer                              | Birth to age 49      |                     | Age 50 to 59        |                     | Age 60 to 69        |                     | Age 70 to 79        |                     | Age 30 to 70        |                    | Birth to age 79     |                    |
|-----------------------|-------------------------------------|----------------------|---------------------|---------------------|---------------------|---------------------|---------------------|---------------------|---------------------|---------------------|--------------------|---------------------|--------------------|
|                       |                                     | Male                 | Female              | Male                | Female              | Male                | Female              | Male                | Female              | Male                | Female             | Male                | Female             |
| Global                | Pancreatic cancer                   | 0.04<br>(1 in 2650)  | 0.03<br>(1 in 3976) | 0.10<br>(1 in 955)  | 0.07<br>(1 in 1436) | 0.27<br>(1 in 371)  | 0.19<br>(1 in 520)  | 0.48<br>(1 in 210)  | 0.39<br>(1 in 257)  | 0.88<br>(1 in 113)  | 0.67<br>(1 in 149) | 0.89<br>(1 in 113)  | 0.67<br>(1 in 148) |
| Global                | Larynx cancer                       | 0.04<br>(1 in 2587)  | 0.01<br>(1 in 9601) | 0.12<br>(1 in 809)  | 0.02<br>(1 in 4960) | 0.24<br>(1 in 417)  | 0.04<br>(1 in 2816) | 0.27<br>(1 in 369)  | 0.04<br>(1 in 2427) | 0.67<br>(1 in 149)  | 0.11<br>(1 in 943) | 0.67<br>(1 in 149)  | 0.11<br>(1 in 932) |
| Global                | Tracheal, bronchus, and lung cancer | 0.18<br>(1 in 559)   | 0.11<br>(1 in 914)  | 0.64<br>(1 in 155)  | 0.28<br>(1 in 355)  | 1.93<br>(1 in 52)   | 0.73<br>(1 in 136)  | 3.10<br>(1 in 32)   | 1.21<br>(1 in 83)   | 5.75<br>(1 in 17)   | 2.31<br>(1 in 43)  | 5.76<br>(1 in 17)   | 2.32<br>(1 in 43)  |
| Global                | Malignant skin melanoma             | 0.08<br>(1 in 1324)  | 0.10<br>(1 in 1012) | 0.08<br>(1 in 1272) | 0.07<br>(1 in 1468) | 0.14<br>(1 in 732)  | 0.10<br>(1 in 996)  | 0.23<br>(1 in 426)  | 0.15<br>(1 in 663)  | 0.51<br>(1 in 195)  | 0.40<br>(1 in 251) | 0.52<br>(1 in 191)  | 0.42<br>(1 in 239) |
| Global                | Non-melanoma skin cancer            | 0.76<br>(1 in 132)   | 0.87<br>(1 in 115)  | 1.74<br>(1 in 57)   | 1.44<br>(1 in 70)   | 4.68<br>(1 in 21)   | 2.97<br>(1 in 34)   | 8.69<br>(1 in 12)   | 4.77<br>(1 in 21)   | 15.05<br>(1 in 7)   | 9.63<br>(1 in 10)  | 15.12<br>(1 in 7)   | 9.72<br>(1 in 10)  |
| Global                | Breast cancer                       | 0.01<br>(1 in 12912) | 1.14<br>(1 in 88)   | 0.01<br>(1 in 8233) | 1.20<br>(1 in 83)   | 0.03<br>(1 in 3636) | 1.56<br>(1 in 64)   | 0.04<br>(1 in 2849) | 1.71<br>(1 in 59)   | 0.08<br>(1 in 1225) | 5.44<br>(1 in 18)  | 0.08<br>(1 in 1212) | 5.49<br>(1 in 18)  |
| Global                | Cervical cancer                     | 0                    | 0.59<br>(1 in 168)  | 0                   | 0.35<br>(1 in 289)  | 0                   | 0.32<br>(1 in 312)  | 0                   | 0.28<br>(1 in 357)  | 0                   | 1.48<br>(1 in 68)  | 0                   | 1.53<br>(1 in 65)  |
| Global                | Uterine cancer                      | 0                    | 0.13<br>(1 in 745)  | 0                   | 0.29<br>(1 in 339)  | 0                   | 0.43<br>(1 in 231)  | 0                   | 0.44<br>(1 in 230)  | 0                   | 1.29<br>(1 in 78)  | 0                   | 1.29<br>(1 in 77)  |
| Global                | Ovarian cancer                      | 0                    | 0.18<br>(1 in 569)  | 0                   | 0.17<br>(1 in 592)  | 0                   | 0.22<br>(1 in 445)  | 0                   | 0.25<br>(1 in 392)  | 0                   | 0.79<br>(1 in 127) | 0                   | 0.82<br>(1 in 122) |
| Global                | Prostate cancer                     | 0.06<br>(1 in 1816)  | 0                   | 0.41<br>(1 in 242)  | 0                   | 1.69<br>(1 in 59)   | 0                   | 3.43<br>(1 in 29)   | 0                   | 5.50<br>(1 in 18)   | 0                  | 5.50<br>(1 in 18)   | 0                  |
| Global                | Testicular cancer                   | 0.11<br>(1 in 935)   | 0                   | 0.01<br>(1 in 8254) | 0                   | 0.01<br>(1 in 9551) | 0                   | 0.01<br>(1 in 9075) | 0                   | 0.10<br>(1 in 1046) | 0                  | 0.14<br>(1 in 712)  | 0                  |

| Location/SDI Quintile | Cancer                                  | Birth to age 49      |                      | Age 50 to 59         |                      | Age 60 to 69        |                      | Age 70 to 79        |                     | Age 30 to 70        |                     | Birth to age 79     |                     |
|-----------------------|-----------------------------------------|----------------------|----------------------|----------------------|----------------------|---------------------|----------------------|---------------------|---------------------|---------------------|---------------------|---------------------|---------------------|
|                       |                                         | Male                 | Female               | Male                 | Female               | Male                | Female               | Male                | Female              | Male                | Female              | Male                | Female              |
| Global                | Kidney cancer                           | 0.09<br>(1 in 1081)  | 0.07<br>(1 in 1338)  | 0.14<br>(1 in 723)   | 0.07<br>(1 in 1409)  | 0.26<br>(1 in 391)  | 0.13<br>(1 in 779)   | 0.38<br>(1 in 266)  | 0.19<br>(1 in 523)  | 0.84<br>(1 in 119)  | 0.44<br>(1 in 228)  | 0.86<br>(1 in 116)  | 0.46<br>(1 in 215)  |
| Global                | Bladder cancer                          | 0.05<br>(1 in 1872)  | 0.02<br>(1 in 4961)  | 0.14<br>(1 in 717)   | 0.04<br>(1 in 2603)  | 0.39<br>(1 in 254)  | 0.09<br>(1 in 1124)  | 0.77<br>(1 in 129)  | 0.18<br>(1 in 542)  | 1.35<br>(1 in 74)   | 0.33<br>(1 in 303)  | 1.36<br>(1 in 74)   | 0.33<br>(1 in 301)  |
| Global                | Brain and central nervous system cancer | 0.19<br>(1 in 531)   | 0.15<br>(1 in 646)   | 0.09<br>(1 in 1087)  | 0.07<br>(1 in 1369)  | 0.15<br>(1 in 658)  | 0.11<br>(1 in 882)   | 0.19<br>(1 in 520)  | 0.14<br>(1 in 692)  | 0.54<br>(1 in 185)  | 0.42<br>(1 in 241)  | 0.62<br>(1 in 160)  | 0.48<br>(1 in 206)  |
| Global                | Thyroid cancer                          | 0.05<br>(1 in 1918)  | 0.16<br>(1 in 636)   | 0.05<br>(1 in 1894)  | 0.10<br>(1 in 1023)  | 0.06<br>(1 in 1749) | 0.12<br>(1 in 852)   | 0.07<br>(1 in 1388) | 0.11<br>(1 in 921)  | 0.23<br>(1 in 442)  | 0.45<br>(1 in 221)  | 0.23<br>(1 in 427)  | 0.48<br>(1 in 208)  |
| Global                | Mesothelioma                            | 0.01<br>(1 in 19175) | 0.00<br>(1 in 24726) | 0.01<br>(1 in 8471)  | 0.00<br>(1 in 22587) | 0.02<br>(1 in 4224) | 0.01<br>(1 in 12207) | 0.05<br>(1 in 1840) | 0.01<br>(1 in 6757) | 0.09<br>(1 in 1059) | 0.03<br>(1 in 3247) | 0.10<br>(1 in 1052) | 0.03<br>(1 in 3179) |
| Global                | Hodgkin lymphoma                        | 0.07<br>(1 in 1527)  | 0.05<br>(1 in 1944)  | 0.02<br>(1 in 4584)  | 0.01<br>(1 in 10520) | 0.03<br>(1 in 3048) | 0.01<br>(1 in 7985)  | 0.03<br>(1 in 3065) | 0.02<br>(1 in 6377) | 0.12<br>(1 in 825)  | 0.06<br>(1 in 1621) | 0.15<br>(1 in 655)  | 0.09<br>(1 in 1122) |
| Global                | Non-Hodgkin lymphoma                    | 0.14<br>(1 in 722)   | 0.09<br>(1 in 1089)  | 0.13<br>(1 in 771)   | 0.08<br>(1 in 1200)  | 0.25<br>(1 in 402)  | 0.17<br>(1 in 593)   | 0.41<br>(1 in 244)  | 0.28<br>(1 in 362)  | 0.88<br>(1 in 114)  | 0.59<br>(1 in 170)  | 0.92<br>(1 in 108)  | 0.62<br>(1 in 162)  |
| Global                | Multiple myeloma                        | 0.02<br>(1 in 5639)  | 0.01<br>(1 in 7797)  | 0.04<br>(1 in 2402)  | 0.03<br>(1 in 3206)  | 0.09<br>(1 in 1115) | 0.07<br>(1 in 1465)  | 0.16<br>(1 in 627)  | 0.12<br>(1 in 844)  | 0.31<br>(1 in 326)  | 0.23<br>(1 in 436)  | 0.31<br>(1 in 324)  | 0.23<br>(1 in 434)  |
| Global                | Acute lymphoid leukemia                 | 0.04<br>(1 in 2379)  | 0.03<br>(1 in 3165)  | 0.01<br>(1 in 10353) | 0.01<br>(1 in 16497) | 0.02<br>(1 in 6216) | 0.01<br>(1 in 11060) | 0.02<br>(1 in 5327) | 0.01<br>(1 in 8953) | 0.06<br>(1 in 1771) | 0.03<br>(1 in 2902) | 0.09<br>(1 in 1156) | 0.06<br>(1 in 1728) |
| Global                | Chronic lymphoid leukemia               | 0.01<br>(1 in 6980)  | 0.01<br>(1 in 9225)  | 0.02<br>(1 in 4431)  | 0.02<br>(1 in 6435)  | 0.05<br>(1 in 1954) | 0.03<br>(1 in 3165)  | 0.09<br>(1 in 1059) | 0.05<br>(1 in 1898) | 0.18<br>(1 in 557)  | 0.11<br>(1 in 921)  | 0.18<br>(1 in 548)  | 0.11<br>(1 in 904)  |
| Global                | Acute myeloid leukemia                  | 0.05<br>(1 in 2127)  | 0.04<br>(1 in 2503)  | 0.02<br>(1 in 4441)  | 0.02<br>(1 in 5929)  | 0.04<br>(1 in 2273) | 0.03<br>(1 in 3410)  | 0.09<br>(1 in 1128) | 0.05<br>(1 in 1848) | 0.18<br>(1 in 562)  | 0.12<br>(1 in 834)  | 0.20<br>(1 in 495)  | 0.14<br>(1 in 713)  |

| Location/SDI Quintile | Cancer                               | Birth to age 49     |                      | Age 50 to 59         |                      | Age 60 to 69        |                      | Age 70 to 79        |                     | Age 30 to 70        |                     | Birth to age 79     |                     |
|-----------------------|--------------------------------------|---------------------|----------------------|----------------------|----------------------|---------------------|----------------------|---------------------|---------------------|---------------------|---------------------|---------------------|---------------------|
|                       |                                      | Male                | Female               | Male                 | Female               | Male                | Female               | Male                | Female              | Male                | Female              | Male                | Female              |
| Global                | Chronic myeloid leukemia             | 0.01<br>(1 in 8427) | 0.01<br>(1 in 10182) | 0.01<br>(1 in 12722) | 0.01<br>(1 in 15174) | 0.01<br>(1 in 7911) | 0.01<br>(1 in 11334) | 0.03<br>(1 in 3725) | 0.01<br>(1 in 6796) | 0.06<br>(1 in 1775) | 0.04<br>(1 in 2674) | 0.06<br>(1 in 1689) | 0.04<br>(1 in 2504) |
| Global                | Other leukemia                       | 0.09<br>(1 in 1101) | 0.07<br>(1 in 1344)  | 0.03<br>(1 in 3121)  | 0.02<br>(1 in 4140)  | 0.08<br>(1 in 1268) | 0.05<br>(1 in 2085)  | 0.13<br>(1 in 742)  | 0.07<br>(1 in 1353) | 0.27<br>(1 in 364)  | 0.17<br>(1 in 592)  | 0.34<br>(1 in 298)  | 0.22<br>(1 in 454)  |
| Global                | Other malignant neoplasms            | 0.26<br>(1 in 391)  | 0.23<br>(1 in 432)   | 0.15<br>(1 in 659)   | 0.12<br>(1 in 836)   | 0.30<br>(1 in 330)  | 0.22<br>(1 in 463)   | 0.46<br>(1 in 220)  | 0.32<br>(1 in 310)  | 1.05<br>(1 in 95)   | 0.78<br>(1 in 128)  | 1.16<br>(1 in 86)   | 0.89<br>(1 in 113)  |
| High-middle SDI       | Neoplasms                            | 3.69<br>(1 in 27)   | 4.64<br>(1 in 22)    | 5.28<br>(1 in 19)    | 4.41<br>(1 in 23)    | 12.68<br>(1 in 8)   | 7.86<br>(1 in 13)    | 18.71<br>(1 in 5)   | 10.81<br>(1 in 9)   | 34.62<br>(1 in 3)   | 24.39<br>(1 in 4)   | 35.24<br>(1 in 3)   | 25.09<br>(1 in 4)   |
| High-middle SDI       | Lip and oral cavity cancer           | 0.07<br>(1 in 1513) | 0.04<br>(1 in 2851)  | 0.12<br>(1 in 850)   | 0.04<br>(1 in 2670)  | 0.21<br>(1 in 481)  | 0.06<br>(1 in 1622)  | 0.25<br>(1 in 394)  | 0.09<br>(1 in 1124) | 0.64<br>(1 in 156)  | 0.22<br>(1 in 459)  | 0.64<br>(1 in 155)  | 0.22<br>(1 in 449)  |
| High-middle SDI       | Nasopharynx cancer                   | 0.09<br>(1 in 1138) | 0.02<br>(1 in 4037)  | 0.06<br>(1 in 1576)  | 0.01<br>(1 in 7315)  | 0.08<br>(1 in 1222) | 0.02<br>(1 in 5697)  | 0.06<br>(1 in 1664) | 0.02<br>(1 in 5248) | 0.28<br>(1 in 355)  | 0.07<br>(1 in 1412) | 0.29<br>(1 in 341)  | 0.08<br>(1 in 1333) |
| High-middle SDI       | Other pharynx cancer                 | 0.03<br>(1 in 3517) | 0.01<br>(1 in 13808) | 0.08<br>(1 in 1219)  | 0.01<br>(1 in 9990)  | 0.12<br>(1 in 844)  | 0.02<br>(1 in 6474)  | 0.08<br>(1 in 1205) | 0.01<br>(1 in 6702) | 0.31<br>(1 in 322)  | 0.05<br>(1 in 2145) | 0.31<br>(1 in 321)  | 0.05<br>(1 in 2100) |
| High-middle SDI       | Esophageal cancer                    | 0.07<br>(1 in 1440) | 0.02<br>(1 in 4356)  | 0.22<br>(1 in 453)   | 0.05<br>(1 in 1979)  | 0.62<br>(1 in 162)  | 0.19<br>(1 in 537)   | 0.94<br>(1 in 107)  | 0.39<br>(1 in 254)  | 1.83<br>(1 in 55)   | 0.65<br>(1 in 154)  | 1.84<br>(1 in 54)   | 0.65<br>(1 in 153)  |
| High-middle SDI       | Stomach cancer                       | 0.21<br>(1 in 465)  | 0.15<br>(1 in 661)   | 0.53<br>(1 in 188)   | 0.20<br>(1 in 499)   | 1.60<br>(1 in 63)   | 0.51<br>(1 in 196)   | 2.40<br>(1 in 42)   | 0.90<br>(1 in 111)  | 4.66<br>(1 in 21)   | 1.74<br>(1 in 57)   | 4.67<br>(1 in 21)   | 1.76<br>(1 in 57)   |
| High-middle SDI       | Colon and rectum cancer              | 0.26<br>(1 in 383)  | 0.22<br>(1 in 461)   | 0.52<br>(1 in 191)   | 0.37<br>(1 in 274)   | 1.40<br>(1 in 71)   | 0.87<br>(1 in 115)   | 2.26<br>(1 in 44)   | 1.44<br>(1 in 70)   | 4.36<br>(1 in 23)   | 2.84<br>(1 in 35)   | 4.38<br>(1 in 23)   | 2.86<br>(1 in 35)   |
| High-middle SDI       | Liver cancer                         | 0.43<br>(1 in 232)  | 0.08<br>(1 in 1190)  | 0.62<br>(1 in 162)   | 0.14<br>(1 in 716)   | 1.08<br>(1 in 92)   | 0.34<br>(1 in 297)   | 1.18<br>(1 in 84)   | 0.48<br>(1 in 209)  | 3.25<br>(1 in 31)   | 1.03<br>(1 in 97)   | 3.27<br>(1 in 31)   | 1.04<br>(1 in 96)   |
| High-middle SDI       | Gallbladder and biliary tract cancer | 0.01<br>(1 in 8051) | 0.01<br>(1 in 6922)  | 0.03<br>(1 in 3702)  | 0.03<br>(1 in 3117)  | 0.08<br>(1 in 1258) | 0.09<br>(1 in 1103)  | 0.15<br>(1 in 650)  | 0.17<br>(1 in 589)  | 0.27<br>(1 in 368)  | 0.31<br>(1 in 327)  | 0.27<br>(1 in 367)  | 0.31<br>(1 in 326)  |

| Location/SDI Quintile | Cancer                              | Birth to age 49      |                      | Age 50 to 59        |                     | Age 60 to 69        |                     | Age 70 to 79        |                     | Age 30 to 70        |                     | Birth to age 79     |                     |
|-----------------------|-------------------------------------|----------------------|----------------------|---------------------|---------------------|---------------------|---------------------|---------------------|---------------------|---------------------|---------------------|---------------------|---------------------|
|                       |                                     | Male                 | Female               | Male                | Female              | Male                | Female              | Male                | Female              | Male                | Female              | Male                | Female              |
| High-middle SDI       | Pancreatic cancer                   | 0.05<br>(1 in 1903)  | 0.03<br>(1 in 3333)  | 0.13<br>(1 in 770)  | 0.07<br>(1 in 1337) | 0.32<br>(1 in 308)  | 0.21<br>(1 in 467)  | 0.50<br>(1 in 199)  | 0.40<br>(1 in 252)  | 1.00<br>(1 in 100)  | 0.71<br>(1 in 140)  | 1.01<br>(1 in 99)   | 0.71<br>(1 in 140)  |
| High-middle SDI       | Larynx cancer                       | 0.04<br>(1 in 2337)  | 0.01<br>(1 in 12849) | 0.14<br>(1 in 725)  | 0.01<br>(1 in 7111) | 0.27<br>(1 in 365)  | 0.03<br>(1 in 3178) | 0.28<br>(1 in 351)  | 0.04<br>(1 in 2600) | 0.74<br>(1 in 136)  | 0.09<br>(1 in 1102) | 0.74<br>(1 in 136)  | 0.09<br>(1 in 1090) |
| High-middle SDI       | Tracheal, bronchus, and lung cancer | 0.26<br>(1 in 380)   | 0.15<br>(1 in 660)   | 0.93<br>(1 in 108)  | 0.32<br>(1 in 310)  | 2.75<br>(1 in 36)   | 0.94<br>(1 in 107)  | 4.03<br>(1 in 25)   | 1.43<br>(1 in 70)   | 7.77<br>(1 in 13)   | 2.81<br>(1 in 36)   | 7.78<br>(1 in 13)   | 2.82<br>(1 in 35)   |
| High-middle SDI       | Malignant skin melanoma             | 0.07<br>(1 in 1460)  | 0.09<br>(1 in 1078)  | 0.05<br>(1 in 1912) | 0.05<br>(1 in 1953) | 0.07<br>(1 in 1395) | 0.07<br>(1 in 1360) | 0.10<br>(1 in 998)  | 0.10<br>(1 in 984)  | 0.28<br>(1 in 357)  | 0.30<br>(1 in 335)  | 0.29<br>(1 in 342)  | 0.32<br>(1 in 314)  |
| High-middle SDI       | Non-melanoma skin cancer            | 0.38<br>(1 in 264)   | 0.43<br>(1 in 232)   | 0.62<br>(1 in 161)  | 0.59<br>(1 in 169)  | 1.44<br>(1 in 69)   | 1.22<br>(1 in 82)   | 2.46<br>(1 in 41)   | 2.03<br>(1 in 49)   | 4.76<br>(1 in 21)   | 4.14<br>(1 in 24)   | 4.82<br>(1 in 21)   | 4.21<br>(1 in 24)   |
| High-middle SDI       | Breast cancer                       | 0.01<br>(1 in 13006) | 1.27<br>(1 in 78)    | 0.01<br>(1 in 8278) | 1.21<br>(1 in 82)   | 0.03<br>(1 in 3464) | 1.54<br>(1 in 65)   | 0.03<br>(1 in 3151) | 1.53<br>(1 in 65)   | 0.08<br>(1 in 1261) | 5.39<br>(1 in 19)   | 0.08<br>(1 in 1245) | 5.45<br>(1 in 18)   |
| High-middle SDI       | Cervical cancer                     | 0                    | 0.46<br>(1 in 216)   | 0                   | 0.25<br>(1 in 397)  | 0                   | 0.26<br>(1 in 383)  | 0                   | 0.23<br>(1 in 426)  | 0                   | 1.16<br>(1 in 86)   | 0                   | 1.21<br>(1 in 83)   |
| High-middle SDI       | Uterine cancer                      | 0                    | 0.17<br>(1 in 603)   | 0                   | 0.31<br>(1 in 322)  | 0                   | 0.42<br>(1 in 240)  | 0                   | 0.36<br>(1 in 276)  | 0                   | 1.24<br>(1 in 81)   | 0                   | 1.25<br>(1 in 80)   |
| High-middle SDI       | Ovarian cancer                      | 0                    | 0.17<br>(1 in 574)   | 0                   | 0.16<br>(1 in 621)  | 0                   | 0.22<br>(1 in 453)  | 0                   | 0.23<br>(1 in 437)  | 0                   | 0.75<br>(1 in 133)  | 0                   | 0.78<br>(1 in 128)  |
| High-middle SDI       | Prostate cancer                     | 0.06<br>(1 in 1609)  | 0                    | 0.34<br>(1 in 294)  | 0                   | 1.40<br>(1 in 71)   | 0                   | 2.90<br>(1 in 34)   | 0                   | 4.65<br>(1 in 22)   | 0                   | 4.65<br>(1 in 21)   | 0                   |
| High-middle SDI       | Testicular cancer                   | 0.13<br>(1 in 794)   | 0                    | 0.01<br>(1 in 8997) | 0                   | 0.01<br>(1 in 7240) | 0                   | 0.02<br>(1 in 6113) | 0                   | 0.11<br>(1 in 938)  | 0                   | 0.17<br>(1 in 598)  | 0                   |

| Location/SDI Quintile | Cancer                                  | Birth to age 49      |                      | Age 50 to 59        |                      | Age 60 to 69        |                      | Age 70 to 79        |                     | Age 30 to 70        |                     | Birth to age 79     |                     |
|-----------------------|-----------------------------------------|----------------------|----------------------|---------------------|----------------------|---------------------|----------------------|---------------------|---------------------|---------------------|---------------------|---------------------|---------------------|
|                       |                                         | Male                 | Female               | Male                | Female               | Male                | Female               | Male                | Female              | Male                | Female              | Male                | Female              |
| High-middle SDI       | Kidney cancer                           | 0.11<br>(1 in 923)   | 0.08<br>(1 in 1181)  | 0.16<br>(1 in 630)  | 0.07<br>(1 in 1334)  | 0.28<br>(1 in 360)  | 0.15<br>(1 in 683)   | 0.34<br>(1 in 291)  | 0.20<br>(1 in 503)  | 0.86<br>(1 in 116)  | 0.47<br>(1 in 212)  | 0.88<br>(1 in 113)  | 0.50<br>(1 in 198)  |
| High-middle SDI       | Bladder cancer                          | 0.07<br>(1 in 1509)  | 0.02<br>(1 in 4587)  | 0.16<br>(1 in 625)  | 0.04<br>(1 in 2751)  | 0.45<br>(1 in 221)  | 0.09<br>(1 in 1118)  | 0.82<br>(1 in 122)  | 0.18<br>(1 in 567)  | 1.49<br>(1 in 67)   | 0.32<br>(1 in 311)  | 1.49<br>(1 in 67)   | 0.32<br>(1 in 309)  |
| High-middle SDI       | Brain and central nervous system cancer | 0.31<br>(1 in 326)   | 0.25<br>(1 in 394)   | 0.10<br>(1 in 973)  | 0.08<br>(1 in 1196)  | 0.17<br>(1 in 579)  | 0.13<br>(1 in 779)   | 0.20<br>(1 in 499)  | 0.15<br>(1 in 660)  | 0.62<br>(1 in 163)  | 0.48<br>(1 in 206)  | 0.78<br>(1 in 128)  | 0.62<br>(1 in 162)  |
| High-middle SDI       | Thyroid cancer                          | 0.07<br>(1 in 1487)  | 0.18<br>(1 in 571)   | 0.06<br>(1 in 1787) | 0.10<br>(1 in 953)   | 0.04<br>(1 in 2252) | 0.12<br>(1 in 802)   | 0.06<br>(1 in 1708) | 0.10<br>(1 in 990)  | 0.22<br>(1 in 463)  | 0.48<br>(1 in 208)  | 0.23<br>(1 in 443)  | 0.50<br>(1 in 198)  |
| High-middle SDI       | Mesothelioma                            | 0.01<br>(1 in 15938) | 0.00<br>(1 in 26547) | 0.01<br>(1 in 8883) | 0.00<br>(1 in 21858) | 0.01<br>(1 in 7418) | 0.01<br>(1 in 11582) | 0.02<br>(1 in 4770) | 0.01<br>(1 in 8174) | 0.05<br>(1 in 1953) | 0.03<br>(1 in 3498) | 0.05<br>(1 in 1924) | 0.03<br>(1 in 3424) |
| High-middle SDI       | Hodgkin lymphoma                        | 0.09<br>(1 in 1094)  | 0.09<br>(1 in 1156)  | 0.02<br>(1 in 4099) | 0.01<br>(1 in 9321)  | 0.04<br>(1 in 2544) | 0.01<br>(1 in 7692)  | 0.03<br>(1 in 3078) | 0.01<br>(1 in 7130) | 0.14<br>(1 in 729)  | 0.07<br>(1 in 1344) | 0.19<br>(1 in 533)  | 0.12<br>(1 in 805)  |
| High-middle SDI       | Non-Hodgkin lymphoma                    | 0.16<br>(1 in 621)   | 0.11<br>(1 in 904)   | 0.13<br>(1 in 791)  | 0.08<br>(1 in 1308)  | 0.22<br>(1 in 449)  | 0.15<br>(1 in 665)   | 0.29<br>(1 in 346)  | 0.20<br>(1 in 506)  | 0.74<br>(1 in 135)  | 0.49<br>(1 in 202)  | 0.80<br>(1 in 125)  | 0.53<br>(1 in 187)  |
| High-middle SDI       | Multiple myeloma                        | 0.02<br>(1 in 4792)  | 0.01<br>(1 in 7088)  | 0.04<br>(1 in 2443) | 0.03<br>(1 in 3348)  | 0.08<br>(1 in 1218) | 0.06<br>(1 in 1656)  | 0.11<br>(1 in 912)  | 0.08<br>(1 in 1203) | 0.25<br>(1 in 399)  | 0.19<br>(1 in 540)  | 0.25<br>(1 in 395)  | 0.19<br>(1 in 534)  |
| High-middle SDI       | Acute lymphoid leukemia                 | 0.05<br>(1 in 2027)  | 0.03<br>(1 in 2961)  | 0.01<br>(1 in 9284) | 0.01<br>(1 in 14554) | 0.02<br>(1 in 5153) | 0.01<br>(1 in 9219)  | 0.02<br>(1 in 4358) | 0.01<br>(1 in 7606) | 0.07<br>(1 in 1493) | 0.04<br>(1 in 2499) | 0.10<br>(1 in 976)  | 0.06<br>(1 in 1547) |
| High-middle SDI       | Chronic lymphoid leukemia               | 0.03<br>(1 in 3561)  | 0.02<br>(1 in 4831)  | 0.03<br>(1 in 3175) | 0.02<br>(1 in 4527)  | 0.06<br>(1 in 1678) | 0.04<br>(1 in 2469)  | 0.08<br>(1 in 1262) | 0.05<br>(1 in 2076) | 0.19<br>(1 in 521)  | 0.13<br>(1 in 787)  | 0.20<br>(1 in 504)  | 0.13<br>(1 in 761)  |
| High-middle SDI       | Acute myeloid leukemia                  | 0.05<br>(1 in 1975)  | 0.04<br>(1 in 2260)  | 0.02<br>(1 in 5381) | 0.01<br>(1 in 7318)  | 0.03<br>(1 in 2912) | 0.02<br>(1 in 4581)  | 0.06<br>(1 in 1804) | 0.03<br>(1 in 3445) | 0.13<br>(1 in 759)  | 0.08<br>(1 in 1188) | 0.16<br>(1 in 629)  | 0.11<br>(1 in 920)  |

| Location/SDI Quintile | Cancer                               | Birth to age 49     |                      | Age 50 to 59         |                      | Age 60 to 69        |                      | Age 70 to 79        |                      | Age 30 to 70        |                     | Birth to age 79     |                     |
|-----------------------|--------------------------------------|---------------------|----------------------|----------------------|----------------------|---------------------|----------------------|---------------------|----------------------|---------------------|---------------------|---------------------|---------------------|
|                       |                                      | Male                | Female               | Male                 | Female               | Male                | Female               | Male                | Female               | Male                | Female              | Male                | Female              |
| High-middle SDI       | Chronic myeloid leukemia             | 0.01<br>(1 in 8472) | 0.01<br>(1 in 13849) | 0.01<br>(1 in 13881) | 0.00<br>(1 in 21501) | 0.01<br>(1 in 8180) | 0.01<br>(1 in 14812) | 0.02<br>(1 in 4878) | 0.01<br>(1 in 10156) | 0.05<br>(1 in 2043) | 0.03<br>(1 in 3749) | 0.05<br>(1 in 1933) | 0.03<br>(1 in 3513) |
| High-middle SDI       | Other leukemia                       | 0.20<br>(1 in 504)  | 0.15<br>(1 in 673)   | 0.05<br>(1 in 2145)  | 0.03<br>(1 in 3135)  | 0.12<br>(1 in 822)  | 0.07<br>(1 in 1518)  | 0.18<br>(1 in 553)  | 0.08<br>(1 in 1201)  | 0.39<br>(1 in 254)  | 0.21<br>(1 in 471)  | 0.55<br>(1 in 183)  | 0.33<br>(1 in 304)  |
| High-middle SDI       | Other malignant neoplasms            | 0.41<br>(1 in 242)  | 0.38<br>(1 in 262)   | 0.20<br>(1 in 502)   | 0.16<br>(1 in 642)   | 0.42<br>(1 in 239)  | 0.29<br>(1 in 348)   | 0.59<br>(1 in 169)  | 0.40<br>(1 in 250)   | 1.42<br>(1 in 70)   | 1.04<br>(1 in 96)   | 1.61<br>(1 in 62)   | 1.22<br>(1 in 82)   |
| High SDI              | Neoplasms                            | 6.29<br>(1 in 16)   | 8.42<br>(1 in 12)    | 11.77<br>(1 in 8)    | 10.41<br>(1 in 10)   | 26.46<br>(1 in 4)   | 17.30<br>(1 in 6)    | 39.92<br>(1 in 3)   | 23.21<br>(1 in 4)    | 63.06<br>(1 in 2)   | 47.30<br>(1 in 2)   | 63.47<br>(1 in 2)   | 47.90<br>(1 in 2)   |
| High SDI              | Lip and oral cavity cancer           | 0.10<br>(1 in 977)  | 0.05<br>(1 in 2157)  | 0.20<br>(1 in 496)   | 0.06<br>(1 in 1545)  | 0.31<br>(1 in 326)  | 0.10<br>(1 in 975)   | 0.35<br>(1 in 284)  | 0.15<br>(1 in 646)   | 0.95<br>(1 in 105)  | 0.36<br>(1 in 276)  | 0.96<br>(1 in 104)  | 0.37<br>(1 in 272)  |
| High SDI              | Nasopharynx cancer                   | 0.04<br>(1 in 2826) | 0.01<br>(1 in 8970)  | 0.03<br>(1 in 3438)  | 0.01<br>(1 in 11484) | 0.04<br>(1 in 2666) | 0.01<br>(1 in 13981) | 0.04<br>(1 in 2548) | 0.01<br>(1 in 15063) | 0.14<br>(1 in 737)  | 0.03<br>(1 in 3210) | 0.14<br>(1 in 708)  | 0.03<br>(1 in 2972) |
| High SDI              | Other pharynx cancer                 | 0.05<br>(1 in 2019) | 0.01<br>(1 in 8823)  | 0.16<br>(1 in 615)   | 0.03<br>(1 in 3365)  | 0.23<br>(1 in 437)  | 0.04<br>(1 in 2259)  | 0.18<br>(1 in 570)  | 0.04<br>(1 in 2666)  | 0.61<br>(1 in 163)  | 0.12<br>(1 in 820)  | 0.62<br>(1 in 163)  | 0.12<br>(1 in 815)  |
| High SDI              | Esophageal cancer                    | 0.05<br>(1 in 2026) | 0.01<br>(1 in 7776)  | 0.16<br>(1 in 634)   | 0.03<br>(1 in 3245)  | 0.35<br>(1 in 286)  | 0.06<br>(1 in 1578)  | 0.51<br>(1 in 196)  | 0.11<br>(1 in 933)   | 1.06<br>(1 in 94)   | 0.21<br>(1 in 469)  | 1.06<br>(1 in 94)   | 0.21<br>(1 in 467)  |
| High SDI              | Stomach cancer                       | 0.13<br>(1 in 774)  | 0.10<br>(1 in 1016)  | 0.28<br>(1 in 353)   | 0.12<br>(1 in 817)   | 0.72<br>(1 in 139)  | 0.25<br>(1 in 394)   | 1.48<br>(1 in 67)   | 0.55<br>(1 in 183)   | 2.59<br>(1 in 39)   | 1.01<br>(1 in 99)   | 2.60<br>(1 in 39)   | 1.02<br>(1 in 98)   |
| High SDI              | Colon and rectum cancer              | 0.36<br>(1 in 278)  | 0.30<br>(1 in 328)   | 0.85<br>(1 in 118)   | 0.58<br>(1 in 173)   | 2.03<br>(1 in 49)   | 1.13<br>(1 in 88)    | 3.55<br>(1 in 28)   | 2.05<br>(1 in 49)    | 6.62<br>(1 in 15)   | 4.00<br>(1 in 25)   | 6.64<br>(1 in 15)   | 4.02<br>(1 in 25)   |
| High SDI              | Liver cancer                         | 0.13<br>(1 in 771)  | 0.04<br>(1 in 2506)  | 0.32<br>(1 in 310)   | 0.08<br>(1 in 1333)  | 0.59<br>(1 in 171)  | 0.16<br>(1 in 610)   | 0.87<br>(1 in 115)  | 0.34<br>(1 in 292)   | 1.89<br>(1 in 53)   | 0.61<br>(1 in 163)  | 1.90<br>(1 in 53)   | 0.62<br>(1 in 161)  |
| High SDI              | Gallbladder and biliary tract cancer | 0.02<br>(1 in 6123) | 0.01<br>(1 in 6753)  | 0.05<br>(1 in 2155)  | 0.04<br>(1 in 2683)  | 0.17<br>(1 in 577)  | 0.12<br>(1 in 815)   | 0.35<br>(1 in 285)  | 0.27<br>(1 in 372)   | 0.58<br>(1 in 171)  | 0.44<br>(1 in 226)  | 0.59<br>(1 in 171)  | 0.44<br>(1 in 226)  |



| Location/SDI Quintile | Cancer                              | Birth to age 49      |                      | Age 50 to 59        |                     | Age 60 to 69        |                     | Age 70 to 79        |                     | Age 30 to 70       |                     | Birth to age 79    |                     |
|-----------------------|-------------------------------------|----------------------|----------------------|---------------------|---------------------|---------------------|---------------------|---------------------|---------------------|--------------------|---------------------|--------------------|---------------------|
|                       |                                     | Male                 | Female               | Male                | Female              | Male                | Female              | Male                | Female              | Male               | Female              | Male               | Female              |
| High SDI              | Pancreatic cancer                   | 0.06<br>(1 in 1800)  | 0.04<br>(1 in 2765)  | 0.17<br>(1 in 572)  | 0.11<br>(1 in 896)  | 0.45<br>(1 in 223)  | 0.30<br>(1 in 329)  | 0.82<br>(1 in 123)  | 0.63<br>(1 in 158)  | 1.49<br>(1 in 67)  | 1.08<br>(1 in 93)   | 1.49<br>(1 in 67)  | 1.08<br>(1 in 92)   |
| High SDI              | Larynx cancer                       | 0.03<br>(1 in 2941)  | 0.01<br>(1 in 14111) | 0.14<br>(1 in 696)  | 0.02<br>(1 in 4745) | 0.28<br>(1 in 357)  | 0.03<br>(1 in 3072) | 0.32<br>(1 in 312)  | 0.03<br>(1 in 3030) | 0.77<br>(1 in 129) | 0.09<br>(1 in 1078) | 0.78<br>(1 in 129) | 0.09<br>(1 in 1067) |
| High SDI              | Tracheal, bronchus, and lung cancer | 0.18<br>(1 in 547)   | 0.16<br>(1 in 632)   | 0.81<br>(1 in 124)  | 0.51<br>(1 in 194)  | 2.31<br>(1 in 43)   | 1.16<br>(1 in 86)   | 4.04<br>(1 in 25)   | 1.84<br>(1 in 54)   | 7.18<br>(1 in 14)  | 3.63<br>(1 in 28)   | 7.18<br>(1 in 14)  | 3.63<br>(1 in 28)   |
| High SDI              | Malignant skin melanoma             | 0.34<br>(1 in 298)   | 0.46<br>(1 in 216)   | 0.28<br>(1 in 359)  | 0.24<br>(1 in 412)  | 0.45<br>(1 in 223)  | 0.30<br>(1 in 332)  | 0.67<br>(1 in 148)  | 0.39<br>(1 in 260)  | 1.66<br>(1 in 60)  | 1.29<br>(1 in 78)   | 1.73<br>(1 in 58)  | 1.39<br>(1 in 72)   |
| High SDI              | Non-melanoma skin cancer            | 2.72<br>(1 in 37)    | 3.29<br>(1 in 30)    | 6.22<br>(1 in 16)   | 5.02<br>(1 in 20)   | 14.72<br>(1 in 7)   | 9.00<br>(1 in 11)   | 22.94<br>(1 in 4)   | 12.08<br>(1 in 8)   | 39.92<br>(1 in 3)  | 26.29<br>(1 in 4)   | 40.04<br>(1 in 2)  | 26.51<br>(1 in 4)   |
| High SDI              | Breast cancer                       | 0.01<br>(1 in 10251) | 1.87<br>(1 in 53)    | 0.02<br>(1 in 6620) | 2.03<br>(1 in 49)   | 0.04<br>(1 in 2721) | 2.75<br>(1 in 36)   | 0.05<br>(1 in 1873) | 2.97<br>(1 in 34)   | 0.11<br>(1 in 884) | 9.22<br>(1 in 11)   | 0.11<br>(1 in 870) | 9.29<br>(1 in 11)   |
| High SDI              | Cervical cancer                     | 0                    | 0.40<br>(1 in 250)   | 0                   | 0.18<br>(1 in 560)  | 0                   | 0.18<br>(1 in 562)  | 0                   | 0.19<br>(1 in 517)  | 0                  | 0.90<br>(1 in 111)  | 0                  | 0.95<br>(1 in 106)  |
| High SDI              | Uterine cancer                      | 0                    | 0.24<br>(1 in 420)   | 0                   | 0.60<br>(1 in 168)  | 0                   | 0.91<br>(1 in 110)  | 0                   | 0.88<br>(1 in 114)  | 0                  | 2.59<br>(1 in 39)   | 0                  | 2.60<br>(1 in 38)   |
| High SDI              | Ovarian cancer                      | 0                    | 0.22<br>(1 in 461)   | 0                   | 0.22<br>(1 in 452)  | 0                   | 0.31<br>(1 in 320)  | 0                   | 0.38<br>(1 in 260)  | 0                  | 1.09<br>(1 in 91)   | 0                  | 1.13<br>(1 in 88)   |
| High SDI              | Prostate cancer                     | 0.13<br>(1 in 773)   | 0                    | 1.08<br>(1 in 92)   | 0                   | 3.77<br>(1 in 27)   | 0                   | 6.21<br>(1 in 16)   | 0                   | 10.83<br>(1 in 9)  | 0                   | 10.84<br>(1 in 9)  | 0                   |
| High SDI              | Testicular cancer                   | 0.39<br>(1 in 260)   | 0                    | 0.04<br>(1 in 2810) | 0                   | 0.02<br>(1 in 5353) | 0                   | 0.01<br>(1 in 7518) | 0                   | 0.29<br>(1 in 340) | 0                   | 0.45<br>(1 in 221) | 0                   |
| High SDI              | Kidney cancer                       | 0.16<br>(1 in 620)   | 0.11<br>(1 in 950)   | 0.28<br>(1 in 362)  | 0.12<br>(1 in 810)  | 0.52<br>(1 in 194)  | 0.23<br>(1 in 443)  | 0.76<br>(1 in 131)  | 0.35<br>(1 in 285)  | 1.68<br>(1 in 59)  | 0.77<br>(1 in 129)  | 1.71<br>(1 in 59)  | 0.80<br>(1 in 124)  |

| Location/SDI Quintile | Cancer                                  | Birth to age 49      |                      | Age 50 to 59         |                      | Age 60 to 69        |                      | Age 70 to 79        |                      | Age 30 to 70        |                     | Birth to age 79     |                     |
|-----------------------|-----------------------------------------|----------------------|----------------------|----------------------|----------------------|---------------------|----------------------|---------------------|----------------------|---------------------|---------------------|---------------------|---------------------|
|                       |                                         | Male                 | Female               | Male                 | Female               | Male                | Female               | Male                | Female               | Male                | Female              | Male                | Female              |
| High SDI              | Bladder cancer                          | 0.08<br>(1 in 1278)  | 0.03<br>(1 in 3391)  | 0.26<br>(1 in 383)   | 0.07<br>(1 in 1521)  | 0.71<br>(1 in 142)  | 0.15<br>(1 in 673)   | 1.37<br>(1 in 73)   | 0.30<br>(1 in 337)   | 2.40<br>(1 in 42)   | 0.54<br>(1 in 186)  | 2.40<br>(1 in 42)   | 0.54<br>(1 in 185)  |
| High SDI              | Brain and central nervous system cancer | 0.34<br>(1 in 295)   | 0.27<br>(1 in 370)   | 0.14<br>(1 in 707)   | 0.11<br>(1 in 897)   | 0.22<br>(1 in 452)  | 0.17<br>(1 in 603)   | 0.29<br>(1 in 339)  | 0.22<br>(1 in 459)   | 0.85<br>(1 in 118)  | 0.64<br>(1 in 156)  | 0.99<br>(1 in 101)  | 0.76<br>(1 in 131)  |
| High SDI              | Thyroid cancer                          | 0.09<br>(1 in 1055)  | 0.24<br>(1 in 417)   | 0.10<br>(1 in 965)   | 0.16<br>(1 in 629)   | 0.12<br>(1 in 843)  | 0.19<br>(1 in 519)   | 0.12<br>(1 in 827)  | 0.17<br>(1 in 587)   | 0.43<br>(1 in 234)  | 0.73<br>(1 in 136)  | 0.44<br>(1 in 229)  | 0.76<br>(1 in 132)  |
| High SDI              | Mesothelioma                            | 0.01<br>(1 in 18257) | 0.00<br>(1 in 33978) | 0.02<br>(1 in 5194)  | 0.01<br>(1 in 17275) | 0.06<br>(1 in 1625) | 0.01<br>(1 in 7193)  | 0.14<br>(1 in 712)  | 0.03<br>(1 in 3716)  | 0.23<br>(1 in 442)  | 0.05<br>(1 in 2034) | 0.23<br>(1 in 441)  | 0.05<br>(1 in 2019) |
| High SDI              | Hodgkin lymphoma                        | 0.17<br>(1 in 597)   | 0.13<br>(1 in 775)   | 0.04<br>(1 in 2521)  | 0.02<br>(1 in 5449)  | 0.04<br>(1 in 2377) | 0.02<br>(1 in 4731)  | 0.04<br>(1 in 2450) | 0.02<br>(1 in 4254)  | 0.21<br>(1 in 470)  | 0.12<br>(1 in 816)  | 0.29<br>(1 in 345)  | 0.19<br>(1 in 521)  |
| High SDI              | Non-Hodgkin lymphoma                    | 0.26<br>(1 in 382)   | 0.18<br>(1 in 569)   | 0.26<br>(1 in 384)   | 0.18<br>(1 in 561)   | 0.49<br>(1 in 205)  | 0.34<br>(1 in 298)   | 0.85<br>(1 in 118)  | 0.56<br>(1 in 178)   | 1.78<br>(1 in 56)   | 1.20<br>(1 in 83)   | 1.85<br>(1 in 54)   | 1.25<br>(1 in 80)   |
| High SDI              | Multiple myeloma                        | 0.03<br>(1 in 2928)  | 0.02<br>(1 in 4896)  | 0.09<br>(1 in 1128)  | 0.06<br>(1 in 1767)  | 0.18<br>(1 in 555)  | 0.12<br>(1 in 819)   | 0.34<br>(1 in 294)  | 0.22<br>(1 in 447)   | 0.64<br>(1 in 156)  | 0.42<br>(1 in 237)  | 0.64<br>(1 in 156)  | 0.42<br>(1 in 237)  |
| High SDI              | Acute lymphoid leukemia                 | 0.03<br>(1 in 3724)  | 0.02<br>(1 in 5617)  | 0.01<br>(1 in 13621) | 0.00<br>(1 in 22475) | 0.01<br>(1 in 8383) | 0.01<br>(1 in 14547) | 0.02<br>(1 in 6507) | 0.01<br>(1 in 10341) | 0.04<br>(1 in 2296) | 0.03<br>(1 in 3750) | 0.06<br>(1 in 1627) | 0.04<br>(1 in 2578) |
| High SDI              | Chronic lymphoid leukemia               | 0.02<br>(1 in 5303)  | 0.01<br>(1 in 7521)  | 0.05<br>(1 in 2050)  | 0.03<br>(1 in 3323)  | 0.11<br>(1 in 895)  | 0.06<br>(1 in 1636)  | 0.21<br>(1 in 470)  | 0.11<br>(1 in 891)   | 0.39<br>(1 in 257)  | 0.21<br>(1 in 466)  | 0.39<br>(1 in 255)  | 0.22<br>(1 in 462)  |
| High SDI              | Acute myeloid leukemia                  | 0.05<br>(1 in 1918)  | 0.05<br>(1 in 2070)  | 0.03<br>(1 in 3011)  | 0.03<br>(1 in 3500)  | 0.08<br>(1 in 1318) | 0.05<br>(1 in 1921)  | 0.18<br>(1 in 567)  | 0.11<br>(1 in 940)   | 0.32<br>(1 in 315)  | 0.22<br>(1 in 460)  | 0.34<br>(1 in 296)  | 0.24<br>(1 in 425)  |
| High SDI              | Chronic myeloid leukemia                | 0.01<br>(1 in 6673)  | 0.01<br>(1 in 11058) | 0.01<br>(1 in 10111) | 0.01<br>(1 in 17175) | 0.01<br>(1 in 6816) | 0.01<br>(1 in 11748) | 0.04<br>(1 in 2497) | 0.02<br>(1 in 5382)  | 0.08<br>(1 in 1308) | 0.04<br>(1 in 2494) | 0.08<br>(1 in 1257) | 0.04<br>(1 in 2384) |

| Location/SDI Quintile | Cancer                               | Birth to age 49     |                     | Age 50 to 59        |                     | Age 60 to 69        |                     | Age 70 to 79        |                     | Age 30 to 70       |                     | Birth to age 79    |                     |
|-----------------------|--------------------------------------|---------------------|---------------------|---------------------|---------------------|---------------------|---------------------|---------------------|---------------------|--------------------|---------------------|--------------------|---------------------|
|                       |                                      | Male                | Female              | Male                | Female              | Male                | Female              | Male                | Female              | Male               | Female              | Male               | Female              |
| High SDI              | Other leukemia                       | 0.05<br>(1 in 1956) | 0.04<br>(1 in 2814) | 0.02<br>(1 in 4164) | 0.02<br>(1 in 6167) | 0.07<br>(1 in 1519) | 0.04<br>(1 in 2498) | 0.15<br>(1 in 648)  | 0.08<br>(1 in 1221) | 0.27<br>(1 in 377) | 0.15<br>(1 in 656)  | 0.30<br>(1 in 339) | 0.17<br>(1 in 576)  |
| High SDI              | Other malignant neoplasms            | 0.43<br>(1 in 234)  | 0.40<br>(1 in 252)  | 0.18<br>(1 in 542)  | 0.16<br>(1 in 645)  | 0.31<br>(1 in 319)  | 0.26<br>(1 in 382)  | 0.52<br>(1 in 192)  | 0.41<br>(1 in 245)  | 1.25<br>(1 in 80)  | 1.04<br>(1 in 97)   | 1.44<br>(1 in 69)  | 1.22<br>(1 in 82)   |
| Low-middle SDI        | Neoplasms                            | 1.88<br>(1 in 53)   | 3.54<br>(1 in 28)   | 2.71<br>(1 in 37)   | 3.36<br>(1 in 30)   | 5.69<br>(1 in 18)   | 4.74<br>(1 in 21)   | 8.84<br>(1 in 11)   | 6.10<br>(1 in 16)   | 17.55<br>(1 in 6)  | 16.04<br>(1 in 6)   | 17.92<br>(1 in 6)  | 16.61<br>(1 in 6)   |
| Low-middle SDI        | Lip and oral cavity cancer           | 0.13<br>(1 in 746)  | 0.17<br>(1 in 587)  | 0.19<br>(1 in 513)  | 0.16<br>(1 in 617)  | 0.30<br>(1 in 331)  | 0.26<br>(1 in 383)  | 0.36<br>(1 in 278)  | 0.30<br>(1 in 332)  | 0.98<br>(1 in 102) | 0.85<br>(1 in 117)  | 0.99<br>(1 in 101) | 0.89<br>(1 in 112)  |
| Low-middle SDI        | Nasopharynx cancer                   | 0.05<br>(1 in 2169) | 0.03<br>(1 in 3689) | 0.04<br>(1 in 2410) | 0.02<br>(1 in 5111) | 0.05<br>(1 in 2024) | 0.02<br>(1 in 5058) | 0.05<br>(1 in 1934) | 0.02<br>(1 in 5096) | 0.18<br>(1 in 551) | 0.08<br>(1 in 1259) | 0.19<br>(1 in 530) | 0.09<br>(1 in 1162) |
| Low-middle SDI        | Other pharynx cancer                 | 0.06<br>(1 in 1663) | 0.04<br>(1 in 2429) | 0.13<br>(1 in 774)  | 0.07<br>(1 in 1499) | 0.21<br>(1 in 477)  | 0.11<br>(1 in 937)  | 0.21<br>(1 in 485)  | 0.11<br>(1 in 896)  | 0.60<br>(1 in 166) | 0.32<br>(1 in 312)  | 0.60<br>(1 in 166) | 0.33<br>(1 in 307)  |
| Low-middle SDI        | Esophageal cancer                    | 0.05<br>(1 in 1892) | 0.04<br>(1 in 2792) | 0.14<br>(1 in 710)  | 0.07<br>(1 in 1360) | 0.26<br>(1 in 391)  | 0.13<br>(1 in 799)  | 0.34<br>(1 in 292)  | 0.22<br>(1 in 449)  | 0.79<br>(1 in 127) | 0.45<br>(1 in 221)  | 0.79<br>(1 in 127) | 0.46<br>(1 in 219)  |
| Low-middle SDI        | Stomach cancer                       | 0.10<br>(1 in 995)  | 0.10<br>(1 in 1030) | 0.22<br>(1 in 462)  | 0.14<br>(1 in 731)  | 0.52<br>(1 in 191)  | 0.28<br>(1 in 361)  | 0.79<br>(1 in 126)  | 0.46<br>(1 in 219)  | 1.62<br>(1 in 62)  | 0.96<br>(1 in 105)  | 1.63<br>(1 in 62)  | 0.96<br>(1 in 104)  |
| Low-middle SDI        | Colon and rectum cancer              | 0.10<br>(1 in 1009) | 0.10<br>(1 in 962)  | 0.18<br>(1 in 548)  | 0.18<br>(1 in 566)  | 0.42<br>(1 in 238)  | 0.32<br>(1 in 311)  | 0.70<br>(1 in 142)  | 0.59<br>(1 in 170)  | 1.39<br>(1 in 72)  | 1.18<br>(1 in 85)   | 1.40<br>(1 in 71)  | 1.19<br>(1 in 84)   |
| Low-middle SDI        | Liver cancer                         | 0.12<br>(1 in 816)  | 0.06<br>(1 in 1815) | 0.23<br>(1 in 431)  | 0.09<br>(1 in 1074) | 0.43<br>(1 in 234)  | 0.19<br>(1 in 528)  | 0.54<br>(1 in 184)  | 0.30<br>(1 in 338)  | 1.31<br>(1 in 76)  | 0.62<br>(1 in 160)  | 1.32<br>(1 in 76)  | 0.63<br>(1 in 158)  |
| Low-middle SDI        | Gallbladder and biliary tract cancer | 0.01<br>(1 in 9397) | 0.02<br>(1 in 4618) | 0.03<br>(1 in 3679) | 0.06<br>(1 in 1812) | 0.06<br>(1 in 1549) | 0.12<br>(1 in 802)  | 0.11<br>(1 in 886)  | 0.19<br>(1 in 537)  | 0.21<br>(1 in 466) | 0.39<br>(1 in 259)  | 0.22<br>(1 in 465) | 0.39<br>(1 in 258)  |
| Low-middle SDI        | Pancreatic cancer                    | 0.03<br>(1 in 3824) | 0.02<br>(1 in 4622) | 0.07<br>(1 in 1529) | 0.05<br>(1 in 1821) | 0.15<br>(1 in 665)  | 0.13<br>(1 in 759)  | 0.24<br>(1 in 415)  | 0.23<br>(1 in 440)  | 0.48<br>(1 in 208) | 0.43<br>(1 in 231)  | 0.48<br>(1 in 207) | 0.43<br>(1 in 230)  |

| Location/SDI Quintile | Cancer                              | Birth to age 49      |                     | Age 50 to 59         |                      | Age 60 to 69         |                     | Age 70 to 79         |                     | Age 30 to 70        |                     | Birth to age 79     |                     |
|-----------------------|-------------------------------------|----------------------|---------------------|----------------------|----------------------|----------------------|---------------------|----------------------|---------------------|---------------------|---------------------|---------------------|---------------------|
|                       |                                     | Male                 | Female              | Male                 | Female               | Male                 | Female              | Male                 | Female              | Male                | Female              | Male                | Female              |
| Low-middle SDI        | Larynx cancer                       | 0.05<br>(1 in 2201)  | 0.01<br>(1 in 6742) | 0.13<br>(1 in 797)   | 0.03<br>(1 in 3680)  | 0.22<br>(1 in 457)   | 0.04<br>(1 in 2239) | 0.23<br>(1 in 433)   | 0.05<br>(1 in 2002) | 0.62<br>(1 in 162)  | 0.13<br>(1 in 742)  | 0.62<br>(1 in 161)  | 0.14<br>(1 in 732)  |
| Low-middle SDI        | Tracheal, bronchus, and lung cancer | 0.10<br>(1 in 965)   | 0.06<br>(1 in 1715) | 0.31<br>(1 in 324)   | 0.12<br>(1 in 861)   | 0.76<br>(1 in 131)   | 0.23<br>(1 in 426)  | 1.16<br>(1 in 86)    | 0.39<br>(1 in 259)  | 2.31<br>(1 in 43)   | 0.79<br>(1 in 127)  | 2.32<br>(1 in 43)   | 0.79<br>(1 in 126)  |
| Low-middle SDI        | Malignant skin melanoma             | 0.01<br>(1 in 8374)  | 0.02<br>(1 in 6227) | 0.01<br>(1 in 9218)  | 0.01<br>(1 in 11106) | 0.01<br>(1 in 7471)  | 0.01<br>(1 in 7957) | 0.02<br>(1 in 4762)  | 0.02<br>(1 in 5321) | 0.05<br>(1 in 1820) | 0.05<br>(1 in 1926) | 0.06<br>(1 in 1749) | 0.06<br>(1 in 1773) |
| Low-middle SDI        | Non-melanoma skin cancer            | 0.30<br>(1 in 332)   | 0.31<br>(1 in 323)  | 0.34<br>(1 in 293)   | 0.31<br>(1 in 321)   | 0.69<br>(1 in 144)   | 0.55<br>(1 in 182)  | 1.15<br>(1 in 87)    | 0.83<br>(1 in 121)  | 2.40<br>(1 in 42)   | 1.93<br>(1 in 52)   | 2.46<br>(1 in 41)   | 1.99<br>(1 in 50)   |
| Low-middle SDI        | Breast cancer                       | 0.01<br>(1 in 15674) | 0.94<br>(1 in 106)  | 0.01<br>(1 in 10377) | 0.91<br>(1 in 110)   | 0.02<br>(1 in 5750)  | 0.95<br>(1 in 105)  | 0.02<br>(1 in 4455)  | 0.93<br>(1 in 108)  | 0.06<br>(1 in 1807) | 3.61<br>(1 in 28)   | 0.06<br>(1 in 1791) | 3.68<br>(1 in 27)   |
| Low-middle SDI        | Cervical cancer                     | 0                    | 0.69<br>(1 in 145)  | 0                    | 0.46<br>(1 in 219)   | 0                    | 0.41<br>(1 in 243)  | 0                    | 0.34<br>(1 in 291)  | 0                   | 1.83<br>(1 in 55)   | 0                   | 1.89<br>(1 in 53)   |
| Low-middle SDI        | Uterine cancer                      | 0                    | 0.08<br>(1 in 1275) | 0                    | 0.14<br>(1 in 704)   | 0                    | 0.20<br>(1 in 507)  | 0                    | 0.18<br>(1 in 547)  | 0                   | 0.59<br>(1 in 168)  | 0                   | 0.60<br>(1 in 167)  |
| Low-middle SDI        | Ovarian cancer                      | 0                    | 0.20<br>(1 in 511)  | 0                    | 0.18<br>(1 in 566)   | 0                    | 0.21<br>(1 in 466)  | 0                    | 0.21<br>(1 in 484)  | 0                   | 0.75<br>(1 in 134)  | 0                   | 0.79<br>(1 in 126)  |
| Low-middle SDI        | Prostate cancer                     | 0.03<br>(1 in 3452)  | 0                   | 0.17<br>(1 in 603)   | 0                    | 0.74<br>(1 in 136)   | 0                   | 1.86<br>(1 in 54)    | 0                   | 2.77<br>(1 in 36)   | 0                   | 2.77<br>(1 in 36)   | 0                   |
| Low-middle SDI        | Testicular cancer                   | 0.03<br>(1 in 3193)  | 0                   | 0.00<br>(1 in 30027) | 0                    | 0.00<br>(1 in 29109) | 0                   | 0.00<br>(1 in 24458) | 0                   | 0.03<br>(1 in 3482) | 0                   | 0.04<br>(1 in 2371) | 0                   |
| Low-middle SDI        | Kidney cancer                       | 0.07<br>(1 in 1517)  | 0.06<br>(1 in 1544) | 0.07<br>(1 in 1416)  | 0.05<br>(1 in 1908)  | 0.11<br>(1 in 917)   | 0.07<br>(1 in 1378) | 0.13<br>(1 in 745)   | 0.08<br>(1 in 1231) | 0.36<br>(1 in 280)  | 0.25<br>(1 in 405)  | 0.38<br>(1 in 264)  | 0.27<br>(1 in 369)  |

| Location/SDI Quintile | Cancer                                  | Birth to age 49      |                      | Age 50 to 59         |                      | Age 60 to 69        |                      | Age 70 to 79        |                      | Age 30 to 70        |                     | Birth to age 79     |                     |
|-----------------------|-----------------------------------------|----------------------|----------------------|----------------------|----------------------|---------------------|----------------------|---------------------|----------------------|---------------------|---------------------|---------------------|---------------------|
|                       |                                         | Male                 | Female               | Male                 | Female               | Male                | Female               | Male                | Female               | Male                | Female              | Male                | Female              |
| Low-middle SDI        | Bladder cancer                          | 0.06<br>(1 in 1737)  | 0.02<br>(1 in 4421)  | 0.11<br>(1 in 952)   | 0.04<br>(1 in 2850)  | 0.25<br>(1 in 405)  | 0.07<br>(1 in 1418)  | 0.39<br>(1 in 258)  | 0.13<br>(1 in 774)   | 0.79<br>(1 in 127)  | 0.25<br>(1 in 394)  | 0.79<br>(1 in 126)  | 0.26<br>(1 in 389)  |
| Low-middle SDI        | Brain and central nervous system cancer | 0.11<br>(1 in 931)   | 0.09<br>(1 in 1163)  | 0.06<br>(1 in 1649)  | 0.05<br>(1 in 2208)  | 0.09<br>(1 in 1131) | 0.06<br>(1 in 1601)  | 0.10<br>(1 in 1016) | 0.07<br>(1 in 1353)  | 0.30<br>(1 in 328)  | 0.22<br>(1 in 445)  | 0.35<br>(1 in 282)  | 0.27<br>(1 in 374)  |
| Low-middle SDI        | Thyroid cancer                          | 0.03<br>(1 in 3345)  | 0.14<br>(1 in 730)   | 0.02<br>(1 in 4274)  | 0.06<br>(1 in 1671)  | 0.03<br>(1 in 3423) | 0.07<br>(1 in 1538)  | 0.04<br>(1 in 2516) | 0.07<br>(1 in 1534)  | 0.12<br>(1 in 859)  | 0.28<br>(1 in 351)  | 0.12<br>(1 in 818)  | 0.33<br>(1 in 306)  |
| Low-middle SDI        | Mesothelioma                            | 0.00<br>(1 in 21707) | 0.01<br>(1 in 18635) | 0.01<br>(1 in 10863) | 0.00<br>(1 in 21068) | 0.01<br>(1 in 8902) | 0.01<br>(1 in 16866) | 0.02<br>(1 in 5641) | 0.01<br>(1 in 10515) | 0.04<br>(1 in 2367) | 0.02<br>(1 in 4050) | 0.04<br>(1 in 2338) | 0.03<br>(1 in 3914) |
| Low-middle SDI        | Hodgkin lymphoma                        | 0.05<br>(1 in 2194)  | 0.04<br>(1 in 2842)  | 0.02<br>(1 in 6296)  | 0.01<br>(1 in 14543) | 0.02<br>(1 in 4112) | 0.01<br>(1 in 9909)  | 0.03<br>(1 in 3415) | 0.01<br>(1 in 6778)  | 0.09<br>(1 in 1101) | 0.05<br>(1 in 2199) | 0.12<br>(1 in 869)  | 0.07<br>(1 in 1495) |
| Low-middle SDI        | Non-Hodgkin lymphoma                    | 0.10<br>(1 in 1038)  | 0.07<br>(1 in 1355)  | 0.07<br>(1 in 1417)  | 0.05<br>(1 in 2039)  | 0.13<br>(1 in 784)  | 0.10<br>(1 in 1050)  | 0.17<br>(1 in 582)  | 0.13<br>(1 in 771)   | 0.42<br>(1 in 236)  | 0.31<br>(1 in 318)  | 0.47<br>(1 in 215)  | 0.35<br>(1 in 288)  |
| Low-middle SDI        | Multiple myeloma                        | 0.01<br>(1 in 8763)  | 0.01<br>(1 in 8659)  | 0.02<br>(1 in 4463)  | 0.02<br>(1 in 4185)  | 0.05<br>(1 in 2195) | 0.05<br>(1 in 1928)  | 0.07<br>(1 in 1530) | 0.08<br>(1 in 1311)  | 0.14<br>(1 in 696)  | 0.16<br>(1 in 617)  | 0.14<br>(1 in 691)  | 0.16<br>(1 in 612)  |
| Low-middle SDI        | Acute lymphoid leukemia                 | 0.04<br>(1 in 2756)  | 0.03<br>(1 in 3300)  | 0.01<br>(1 in 12089) | 0.00<br>(1 in 21580) | 0.01<br>(1 in 7646) | 0.01<br>(1 in 15398) | 0.01<br>(1 in 6975) | 0.01<br>(1 in 12792) | 0.05<br>(1 in 2196) | 0.03<br>(1 in 3865) | 0.07<br>(1 in 1390) | 0.05<br>(1 in 2031) |
| Low-middle SDI        | Chronic lymphoid leukemia               | 0.00<br>(1 in 37009) | 0.00<br>(1 in 37120) | 0.00<br>(1 in 22035) | 0.00<br>(1 in 27137) | 0.01<br>(1 in 9032) | 0.01<br>(1 in 11464) | 0.02<br>(1 in 4488) | 0.01<br>(1 in 6915)  | 0.04<br>(1 in 2505) | 0.03<br>(1 in 3468) | 0.04<br>(1 in 2464) | 0.03<br>(1 in 3383) |
| Low-middle SDI        | Acute myeloid leukemia                  | 0.04<br>(1 in 2235)  | 0.04<br>(1 in 2654)  | 0.02<br>(1 in 4621)  | 0.02<br>(1 in 6584)  | 0.04<br>(1 in 2782) | 0.02<br>(1 in 4012)  | 0.05<br>(1 in 1933) | 0.04<br>(1 in 2631)  | 0.13<br>(1 in 770)  | 0.09<br>(1 in 1054) | 0.15<br>(1 in 649)  | 0.12<br>(1 in 864)  |
| Low-middle SDI        | Chronic myeloid leukemia                | 0.01<br>(1 in 10052) | 0.01<br>(1 in 8563)  | 0.01<br>(1 in 14045) | 0.01<br>(1 in 10754) | 0.01<br>(1 in 8035) | 0.01<br>(1 in 8280)  | 0.02<br>(1 in 4433) | 0.02<br>(1 in 5783)  | 0.05<br>(1 in 2017) | 0.05<br>(1 in 2118) | 0.05<br>(1 in 1921) | 0.05<br>(1 in 1987) |

| Location/SDI Quintile | Cancer                               | Birth to age 49     |                     | Age 50 to 59        |                     | Age 60 to 69        |                     | Age 70 to 79        |                     | Age 30 to 70       |                     | Birth to age 79    |                     |
|-----------------------|--------------------------------------|---------------------|---------------------|---------------------|---------------------|---------------------|---------------------|---------------------|---------------------|--------------------|---------------------|--------------------|---------------------|
|                       |                                      | Male                | Female              | Male                | Female              | Male                | Female              | Male                | Female              | Male               | Female              | Male               | Female              |
| Low-middle SDI        | Other leukemia                       | 0.06<br>(1 in 1815) | 0.05<br>(1 in 1927) | 0.03<br>(1 in 3932) | 0.02<br>(1 in 4543) | 0.05<br>(1 in 1844) | 0.04<br>(1 in 2729) | 0.09<br>(1 in 1167) | 0.06<br>(1 in 1716) | 0.19<br>(1 in 539) | 0.14<br>(1 in 734)  | 0.22<br>(1 in 454) | 0.17<br>(1 in 593)  |
| Low-middle SDI        | Other malignant neoplasms            | 0.15<br>(1 in 686)  | 0.14<br>(1 in 697)  | 0.10<br>(1 in 1006) | 0.09<br>(1 in 1159) | 0.19<br>(1 in 525)  | 0.15<br>(1 in 680)  | 0.27<br>(1 in 365)  | 0.21<br>(1 in 480)  | 0.63<br>(1 in 159) | 0.50<br>(1 in 200)  | 0.71<br>(1 in 141) | 0.58<br>(1 in 171)  |
| Low SDI               | Neoplasms                            | 1.66<br>(1 in 60)   | 3.04<br>(1 in 33)   | 2.35<br>(1 in 43)   | 3.02<br>(1 in 33)   | 4.55<br>(1 in 22)   | 3.96<br>(1 in 25)   | 7.05<br>(1 in 14)   | 4.98<br>(1 in 20)   | 14.46<br>(1 in 7)  | 13.73<br>(1 in 7)   | 14.81<br>(1 in 7)  | 14.19<br>(1 in 7)   |
| Low SDI               | Lip and oral cavity cancer           | 0.10<br>(1 in 1032) | 0.08<br>(1 in 1211) | 0.15<br>(1 in 649)  | 0.11<br>(1 in 921)  | 0.24<br>(1 in 422)  | 0.16<br>(1 in 610)  | 0.31<br>(1 in 325)  | 0.24<br>(1 in 415)  | 0.78<br>(1 in 127) | 0.59<br>(1 in 171)  | 0.79<br>(1 in 126) | 0.59<br>(1 in 168)  |
| Low SDI               | Nasopharynx cancer                   | 0.04<br>(1 in 2531) | 0.03<br>(1 in 3942) | 0.04<br>(1 in 2429) | 0.02<br>(1 in 4699) | 0.05<br>(1 in 2079) | 0.02<br>(1 in 4632) | 0.05<br>(1 in 2030) | 0.02<br>(1 in 5094) | 0.17<br>(1 in 580) | 0.08<br>(1 in 1224) | 0.18<br>(1 in 562) | 0.09<br>(1 in 1138) |
| Low SDI               | Other pharynx cancer                 | 0.07<br>(1 in 1529) | 0.04<br>(1 in 2567) | 0.14<br>(1 in 703)  | 0.07<br>(1 in 1346) | 0.22<br>(1 in 460)  | 0.11<br>(1 in 951)  | 0.25<br>(1 in 408)  | 0.12<br>(1 in 869)  | 0.67<br>(1 in 150) | 0.33<br>(1 in 304)  | 0.67<br>(1 in 150) | 0.33<br>(1 in 300)  |
| Low SDI               | Esophageal cancer                    | 0.06<br>(1 in 1817) | 0.03<br>(1 in 3182) | 0.14<br>(1 in 712)  | 0.07<br>(1 in 1473) | 0.23<br>(1 in 434)  | 0.11<br>(1 in 911)  | 0.32<br>(1 in 314)  | 0.21<br>(1 in 480)  | 0.74<br>(1 in 135) | 0.42<br>(1 in 241)  | 0.74<br>(1 in 135) | 0.42<br>(1 in 240)  |
| Low SDI               | Stomach cancer                       | 0.11<br>(1 in 936)  | 0.13<br>(1 in 768)  | 0.21<br>(1 in 482)  | 0.18<br>(1 in 546)  | 0.39<br>(1 in 254)  | 0.29<br>(1 in 342)  | 0.58<br>(1 in 172)  | 0.44<br>(1 in 227)  | 1.28<br>(1 in 78)  | 1.03<br>(1 in 97)   | 1.29<br>(1 in 78)  | 1.04<br>(1 in 96)   |
| Low SDI               | Colon and rectum cancer              | 0.09<br>(1 in 1090) | 0.09<br>(1 in 1077) | 0.17<br>(1 in 574)  | 0.17<br>(1 in 573)  | 0.37<br>(1 in 273)  | 0.27<br>(1 in 367)  | 0.61<br>(1 in 165)  | 0.48<br>(1 in 207)  | 1.23<br>(1 in 82)  | 1.01<br>(1 in 99)   | 1.24<br>(1 in 81)  | 1.02<br>(1 in 98)   |
| Low SDI               | Liver cancer                         | 0.10<br>(1 in 980)  | 0.05<br>(1 in 2070) | 0.18<br>(1 in 545)  | 0.09<br>(1 in 1159) | 0.31<br>(1 in 324)  | 0.17<br>(1 in 582)  | 0.43<br>(1 in 234)  | 0.26<br>(1 in 384)  | 1.01<br>(1 in 99)  | 0.56<br>(1 in 179)  | 1.02<br>(1 in 98)  | 0.57<br>(1 in 177)  |
| Low SDI               | Gallbladder and biliary tract cancer | 0.01<br>(1 in 9517) | 0.02<br>(1 in 5580) | 0.03<br>(1 in 3281) | 0.06<br>(1 in 1768) | 0.07<br>(1 in 1415) | 0.12<br>(1 in 815)  | 0.12<br>(1 in 843)  | 0.18<br>(1 in 542)  | 0.23<br>(1 in 435) | 0.38<br>(1 in 263)  | 0.23<br>(1 in 435) | 0.38<br>(1 in 262)  |
| Low SDI               | Pancreatic cancer                    | 0.02<br>(1 in 4866) | 0.01<br>(1 in 6672) | 0.06<br>(1 in 1817) | 0.04<br>(1 in 2447) | 0.12<br>(1 in 844)  | 0.09<br>(1 in 1073) | 0.19<br>(1 in 531)  | 0.16<br>(1 in 623)  | 0.38<br>(1 in 262) | 0.31<br>(1 in 324)  | 0.38<br>(1 in 262) | 0.31<br>(1 in 323)  |

| Location/SDI Quintile | Cancer                              | Birth to age 49      |                     | Age 50 to 59         |                      | Age 60 to 69         |                     | Age 70 to 79         |                     | Age 30 to 70        |                     | Birth to age 79     |                     |
|-----------------------|-------------------------------------|----------------------|---------------------|----------------------|----------------------|----------------------|---------------------|----------------------|---------------------|---------------------|---------------------|---------------------|---------------------|
|                       |                                     | Male                 | Female              | Male                 | Female               | Male                 | Female              | Male                 | Female              | Male                | Female              | Male                | Female              |
| Low SDI               | Larynx cancer                       | 0.04<br>(1 in 2267)  | 0.02<br>(1 in 5479) | 0.13<br>(1 in 768)   | 0.04<br>(1 in 2567)  | 0.22<br>(1 in 461)   | 0.06<br>(1 in 1677) | 0.23<br>(1 in 443)   | 0.06<br>(1 in 1572) | 0.62<br>(1 in 163)  | 0.18<br>(1 in 560)  | 0.62<br>(1 in 162)  | 0.18<br>(1 in 554)  |
| Low SDI               | Tracheal, bronchus, and lung cancer | 0.09<br>(1 in 1167)  | 0.06<br>(1 in 1705) | 0.28<br>(1 in 358)   | 0.11<br>(1 in 888)   | 0.69<br>(1 in 145)   | 0.21<br>(1 in 466)  | 1.18<br>(1 in 84)    | 0.32<br>(1 in 314)  | 2.22<br>(1 in 45)   | 0.70<br>(1 in 143)  | 2.22<br>(1 in 45)   | 0.70<br>(1 in 142)  |
| Low SDI               | Malignant skin melanoma             | 0.01<br>(1 in 9973)  | 0.01<br>(1 in 8007) | 0.01<br>(1 in 10055) | 0.01<br>(1 in 11109) | 0.01<br>(1 in 7978)  | 0.01<br>(1 in 8364) | 0.02<br>(1 in 5759)  | 0.02<br>(1 in 6062) | 0.05<br>(1 in 2075) | 0.05<br>(1 in 2115) | 0.05<br>(1 in 2006) | 0.05<br>(1 in 2003) |
| Low SDI               | Non-melanoma skin cancer            | 0.32<br>(1 in 317)   | 0.27<br>(1 in 365)  | 0.24<br>(1 in 424)   | 0.17<br>(1 in 578)   | 0.37<br>(1 in 270)   | 0.24<br>(1 in 418)  | 0.49<br>(1 in 206)   | 0.28<br>(1 in 359)  | 1.32<br>(1 in 76)   | 0.89<br>(1 in 112)  | 1.40<br>(1 in 71)   | 0.96<br>(1 in 104)  |
| Low SDI               | Breast cancer                       | 0.01<br>(1 in 12946) | 0.61<br>(1 in 165)  | 0.01<br>(1 in 10019) | 0.66<br>(1 in 151)   | 0.02<br>(1 in 5730)  | 0.69<br>(1 in 144)  | 0.02<br>(1 in 4071)  | 0.73<br>(1 in 138)  | 0.06<br>(1 in 1688) | 2.63<br>(1 in 38)   | 0.06<br>(1 in 1675) | 2.66<br>(1 in 38)   |
| Low SDI               | Cervical cancer                     | 0                    | 0.89<br>(1 in 112)  | 0                    | 0.63<br>(1 in 158)   | 0                    | 0.56<br>(1 in 180)  | 0                    | 0.44<br>(1 in 225)  | 0                   | 2.43<br>(1 in 41)   | 0                   | 2.51<br>(1 in 40)   |
| Low SDI               | Uterine cancer                      | 0                    | 0.04<br>(1 in 2750) | 0                    | 0.09<br>(1 in 1128)  | 0                    | 0.14<br>(1 in 704)  | 0                    | 0.14<br>(1 in 706)  | 0                   | 0.41<br>(1 in 246)  | 0                   | 0.41<br>(1 in 245)  |
| Low SDI               | Ovarian cancer                      | 0                    | 0.11<br>(1 in 888)  | 0                    | 0.14<br>(1 in 739)   | 0                    | 0.16<br>(1 in 637)  | 0                    | 0.16<br>(1 in 637)  | 0                   | 0.54<br>(1 in 184)  | 0                   | 0.56<br>(1 in 178)  |
| Low SDI               | Prostate cancer                     | 0.02<br>(1 in 6088)  | 0                   | 0.11<br>(1 in 871)   | 0                    | 0.51<br>(1 in 194)   | 0                   | 1.30<br>(1 in 77)    | 0                   | 1.93<br>(1 in 52)   | 0                   | 1.93<br>(1 in 52)   | 0                   |
| Low SDI               | Testicular cancer                   | 0.01<br>(1 in 8592)  | 0                   | 0.00<br>(1 in 56134) | 0                    | 0.00<br>(1 in 48142) | 0                   | 0.00<br>(1 in 52010) | 0                   | 0.01<br>(1 in 7747) | 0                   | 0.02<br>(1 in 5741) | 0                   |
| Low SDI               | Kidney cancer                       | 0.05<br>(1 in 1905)  | 0.05<br>(1 in 1832) | 0.06<br>(1 in 1801)  | 0.04<br>(1 in 2383)  | 0.09<br>(1 in 1162)  | 0.06<br>(1 in 1809) | 0.10<br>(1 in 993)   | 0.06<br>(1 in 1674) | 0.27<br>(1 in 364)  | 0.19<br>(1 in 535)  | 0.29<br>(1 in 340)  | 0.21<br>(1 in 473)  |

| Location/SDI Quintile | Cancer                                  | Birth to age 49         |                         | Age 50 to 59            |                         | Age 60 to 69            |                         | Age 70 to 79           |                         | Age 30 to 70           |                        | Birth to age 79        |                        |
|-----------------------|-----------------------------------------|-------------------------|-------------------------|-------------------------|-------------------------|-------------------------|-------------------------|------------------------|-------------------------|------------------------|------------------------|------------------------|------------------------|
|                       |                                         | Male                    | Female                  | Male                    | Female                  | Male                    | Female                  | Male                   | Female                  | Male                   | Female                 | Male                   | Female                 |
| Low SDI               | Bladder cancer                          | 0.02<br>(1 in<br>4347)  | 0.01<br>(1 in<br>8108)  | 0.06<br>(1 in<br>1794)  | 0.03<br>(1 in<br>3735)  | 0.15<br>(1 in<br>659)   | 0.06<br>(1 in<br>1759)  | 0.28<br>(1 in<br>363)  | 0.11<br>(1 in<br>920)   | 0.50<br>(1 in<br>198)  | 0.20<br>(1 in<br>492)  | 0.51<br>(1 in<br>198)  | 0.20<br>(1 in<br>489)  |
| Low SDI               | Brain and central nervous system cancer | 0.08<br>(1 in<br>1210)  | 0.08<br>(1 in<br>1212)  | 0.05<br>(1 in<br>1865)  | 0.05<br>(1 in<br>2044)  | 0.07<br>(1 in<br>1491)  | 0.06<br>(1 in<br>1737)  | 0.08<br>(1 in<br>1187) | 0.07<br>(1 in<br>1425)  | 0.25<br>(1 in<br>399)  | 0.22<br>(1 in<br>456)  | 0.29<br>(1 in<br>348)  | 0.26<br>(1 in<br>386)  |
| Low SDI               | Thyroid cancer                          | 0.02<br>(1 in<br>4128)  | 0.10<br>(1 in<br>1039)  | 0.02<br>(1 in<br>5625)  | 0.05<br>(1 in<br>2218)  | 0.03<br>(1 in<br>3726)  | 0.05<br>(1 in<br>1938)  | 0.03<br>(1 in<br>2902) | 0.06<br>(1 in<br>1768)  | 0.10<br>(1 in<br>1022) | 0.22<br>(1 in<br>452)  | 0.10<br>(1 in<br>968)  | 0.25<br>(1 in<br>401)  |
| Low SDI               | Mesothelioma                            | 0.00<br>(1 in<br>30426) | 0.01<br>(1 in<br>19035) | 0.01<br>(1 in<br>14308) | 0.01<br>(1 in<br>19343) | 0.01<br>(1 in<br>10433) | 0.01<br>(1 in<br>17108) | 0.01<br>(1 in<br>6696) | 0.01<br>(1 in<br>13017) | 0.03<br>(1 in<br>2898) | 0.02<br>(1 in<br>4292) | 0.03<br>(1 in<br>2874) | 0.02<br>(1 in<br>4176) |
| Low SDI               | Hodgkin lymphoma                        | 0.03<br>(1 in<br>2901)  | 0.02<br>(1 in<br>4969)  | 0.01<br>(1 in<br>6730)  | 0.01<br>(1 in<br>18237) | 0.02<br>(1 in<br>4705)  | 0.01<br>(1 in<br>12205) | 0.03<br>(1 in<br>3756) | 0.01<br>(1 in<br>8367)  | 0.08<br>(1 in<br>1228) | 0.04<br>(1 in<br>2836) | 0.10<br>(1 in<br>1029) | 0.05<br>(1 in<br>2186) |
| Low SDI               | Non-Hodgkin lymphoma                    | 0.09<br>(1 in<br>1072)  | 0.06<br>(1 in<br>1750)  | 0.07<br>(1 in<br>1446)  | 0.05<br>(1 in<br>2153)  | 0.12<br>(1 in<br>811)   | 0.09<br>(1 in<br>1156)  | 0.17<br>(1 in<br>594)  | 0.12<br>(1 in<br>831)   | 0.41<br>(1 in<br>242)  | 0.29<br>(1 in<br>348)  | 0.45<br>(1 in<br>221)  | 0.31<br>(1 in<br>322)  |
| Low SDI               | Multiple myeloma                        | 0.01<br>(1 in<br>10074) | 0.01<br>(1 in<br>11065) | 0.02<br>(1 in<br>4812)  | 0.02<br>(1 in<br>4575)  | 0.04<br>(1 in<br>2260)  | 0.05<br>(1 in<br>2064)  | 0.07<br>(1 in<br>1519) | 0.07<br>(1 in<br>1364)  | 0.14<br>(1 in<br>714)  | 0.15<br>(1 in<br>659)  | 0.14<br>(1 in<br>711)  | 0.15<br>(1 in<br>655)  |
| Low SDI               | Acute lymphoid leukemia                 | 0.03<br>(1 in<br>3073)  | 0.03<br>(1 in<br>3750)  | 0.01<br>(1 in<br>14143) | 0.00<br>(1 in<br>29652) | 0.01<br>(1 in<br>9179)  | 0.00<br>(1 in<br>22921) | 0.01<br>(1 in<br>9372) | 0.00<br>(1 in<br>20156) | 0.04<br>(1 in<br>2757) | 0.02<br>(1 in<br>5543) | 0.06<br>(1 in<br>1635) | 0.04<br>(1 in<br>2541) |
| Low SDI               | Chronic lymphoid leukemia               | 0.00<br>(1 in<br>73582) | 0.00<br>(1 in<br>70405) | 0.00<br>(1 in<br>24685) | 0.00<br>(1 in<br>30611) | 0.01<br>(1 in<br>8784)  | 0.01<br>(1 in<br>10667) | 0.03<br>(1 in<br>3910) | 0.02<br>(1 in<br>5992)  | 0.04<br>(1 in<br>2373) | 0.03<br>(1 in<br>3285) | 0.04<br>(1 in<br>2360) | 0.03<br>(1 in<br>3252) |
| Low SDI               | Acute myeloid leukemia                  | 0.04<br>(1 in<br>2234)  | 0.03<br>(1 in<br>2979)  | 0.02<br>(1 in<br>4085)  | 0.02<br>(1 in<br>6135)  | 0.04<br>(1 in<br>2366)  | 0.03<br>(1 in<br>3925)  | 0.06<br>(1 in<br>1733) | 0.04<br>(1 in<br>2595)  | 0.15<br>(1 in<br>688)  | 0.10<br>(1 in<br>1046) | 0.17<br>(1 in<br>591)  | 0.11<br>(1 in<br>879)  |
| Low SDI               | Chronic myeloid leukemia                | 0.01<br>(1 in<br>7125)  | 0.02<br>(1 in<br>5895)  | 0.01<br>(1 in<br>9900)  | 0.01<br>(1 in<br>6796)  | 0.02<br>(1 in<br>5468)  | 0.02<br>(1 in<br>4927)  | 0.03<br>(1 in<br>3029) | 0.03<br>(1 in<br>3443)  | 0.07<br>(1 in<br>1396) | 0.08<br>(1 in<br>1299) | 0.08<br>(1 in<br>1326) | 0.08<br>(1 in<br>1235) |



| Location/SDI Quintile | Cancer                               | Birth to age 49     |                     | Age 50 to 59        |                     | Age 60 to 69        |                     | Age 70 to 79        |                     | Age 30 to 70       |                     | Birth to age 79    |                     |
|-----------------------|--------------------------------------|---------------------|---------------------|---------------------|---------------------|---------------------|---------------------|---------------------|---------------------|--------------------|---------------------|--------------------|---------------------|
|                       |                                      | Male                | Female              | Male                | Female              | Male                | Female              | Male                | Female              | Male               | Female              | Male               | Female              |
| Low SDI               | Other leukemia                       | 0.03<br>(1 in 2979) | 0.04<br>(1 in 2726) | 0.02<br>(1 in 5557) | 0.02<br>(1 in 5638) | 0.04<br>(1 in 2754) | 0.03<br>(1 in 3654) | 0.06<br>(1 in 1751) | 0.05<br>(1 in 2198) | 0.12<br>(1 in 810) | 0.10<br>(1 in 973)  | 0.14<br>(1 in 690) | 0.13<br>(1 in 786)  |
| Low SDI               | Other malignant neoplasms            | 0.14<br>(1 in 699)  | 0.13<br>(1 in 759)  | 0.11<br>(1 in 936)  | 0.10<br>(1 in 1044) | 0.18<br>(1 in 544)  | 0.15<br>(1 in 669)  | 0.26<br>(1 in 391)  | 0.20<br>(1 in 512)  | 0.61<br>(1 in 163) | 0.50<br>(1 in 199)  | 0.69<br>(1 in 145) | 0.57<br>(1 in 175)  |
| Middle SDI            | Neoplasms                            | 2.81<br>(1 in 36)   | 3.83<br>(1 in 26)   | 3.91<br>(1 in 26)   | 3.66<br>(1 in 27)   | 9.33<br>(1 in 11)   | 5.89<br>(1 in 17)   | 14.40<br>(1 in 7)   | 8.10<br>(1 in 12)   | 27.03<br>(1 in 4)  | 19.32<br>(1 in 5)   | 27.51<br>(1 in 4)  | 19.88<br>(1 in 5)   |
| Middle SDI            | Lip and oral cavity cancer           | 0.09<br>(1 in 1064) | 0.05<br>(1 in 1890) | 0.13<br>(1 in 752)  | 0.06<br>(1 in 1687) | 0.22<br>(1 in 449)  | 0.09<br>(1 in 1053) | 0.30<br>(1 in 330)  | 0.15<br>(1 in 685)  | 0.74<br>(1 in 135) | 0.35<br>(1 in 289)  | 0.75<br>(1 in 133) | 0.35<br>(1 in 284)  |
| Middle SDI            | Nasopharynx cancer                   | 0.09<br>(1 in 1157) | 0.03<br>(1 in 3291) | 0.06<br>(1 in 1546) | 0.02<br>(1 in 5491) | 0.08<br>(1 in 1198) | 0.02<br>(1 in 4507) | 0.08<br>(1 in 1270) | 0.03<br>(1 in 3775) | 0.30<br>(1 in 332) | 0.09<br>(1 in 1086) | 0.31<br>(1 in 320) | 0.10<br>(1 in 1028) |
| Middle SDI            | Other pharynx cancer                 | 0.03<br>(1 in 3119) | 0.01<br>(1 in 7429) | 0.07<br>(1 in 1449) | 0.02<br>(1 in 4689) | 0.10<br>(1 in 976)  | 0.03<br>(1 in 3123) | 0.10<br>(1 in 964)  | 0.04<br>(1 in 2812) | 0.31<br>(1 in 327) | 0.10<br>(1 in 993)  | 0.31<br>(1 in 326) | 0.10<br>(1 in 977)  |
| Middle SDI            | Esophageal cancer                    | 0.05<br>(1 in 1982) | 0.03<br>(1 in 3753) | 0.16<br>(1 in 608)  | 0.06<br>(1 in 1711) | 0.50<br>(1 in 200)  | 0.18<br>(1 in 557)  | 0.80<br>(1 in 125)  | 0.32<br>(1 in 308)  | 1.50<br>(1 in 67)  | 0.59<br>(1 in 170)  | 1.50<br>(1 in 66)  | 0.59<br>(1 in 170)  |
| Middle SDI            | Stomach cancer                       | 0.17<br>(1 in 588)  | 0.11<br>(1 in 909)  | 0.38<br>(1 in 261)  | 0.15<br>(1 in 654)  | 1.14<br>(1 in 88)   | 0.40<br>(1 in 251)  | 1.76<br>(1 in 57)   | 0.70<br>(1 in 143)  | 3.40<br>(1 in 29)  | 1.34<br>(1 in 74)   | 3.41<br>(1 in 29)  | 1.35<br>(1 in 74)   |
| Middle SDI            | Colon and rectum cancer              | 0.19<br>(1 in 525)  | 0.15<br>(1 in 675)  | 0.32<br>(1 in 311)  | 0.24<br>(1 in 415)  | 0.82<br>(1 in 122)  | 0.53<br>(1 in 187)  | 1.33<br>(1 in 75)   | 0.91<br>(1 in 110)  | 2.62<br>(1 in 38)  | 1.81<br>(1 in 55)   | 2.63<br>(1 in 38)  | 1.82<br>(1 in 55)   |
| Middle SDI            | Liver cancer                         | 0.36<br>(1 in 275)  | 0.08<br>(1 in 1274) | 0.54<br>(1 in 187)  | 0.14<br>(1 in 729)  | 1.01<br>(1 in 99)   | 0.34<br>(1 in 296)  | 1.20<br>(1 in 84)   | 0.52<br>(1 in 193)  | 3.05<br>(1 in 33)  | 1.06<br>(1 in 94)   | 3.08<br>(1 in 33)  | 1.07<br>(1 in 94)   |
| Middle SDI            | Gallbladder and biliary tract cancer | 0.01<br>(1 in 8501) | 0.01<br>(1 in 6895) | 0.03<br>(1 in 3694) | 0.04<br>(1 in 2811) | 0.07<br>(1 in 1469) | 0.09<br>(1 in 1160) | 0.13<br>(1 in 775)  | 0.15<br>(1 in 662)  | 0.24<br>(1 in 425) | 0.29<br>(1 in 349)  | 0.24<br>(1 in 424) | 0.29<br>(1 in 348)  |
| Middle SDI            | Pancreatic cancer                    | 0.03<br>(1 in 3178) | 0.02<br>(1 in 4531) | 0.07<br>(1 in 1371) | 0.05<br>(1 in 1896) | 0.18<br>(1 in 563)  | 0.13<br>(1 in 744)  | 0.29<br>(1 in 343)  | 0.24<br>(1 in 409)  | 0.57<br>(1 in 175) | 0.45<br>(1 in 221)  | 0.57<br>(1 in 175) | 0.45<br>(1 in 221)  |

| Location/SDI Quintile | Cancer                              | Birth to age 49      |                      | Age 50 to 59         |                     | Age 60 to 69         |                     | Age 70 to 79        |                     | Age 30 to 70        |                     | Birth to age 79     |                     |
|-----------------------|-------------------------------------|----------------------|----------------------|----------------------|---------------------|----------------------|---------------------|---------------------|---------------------|---------------------|---------------------|---------------------|---------------------|
|                       |                                     | Male                 | Female               | Male                 | Female              | Male                 | Female              | Male                | Female              | Male                | Female              | Male                | Female              |
| Middle SDI            | Larynx cancer                       | 0.03<br>(1 in 3123)  | 0.01<br>(1 in 12857) | 0.09<br>(1 in 1054)  | 0.01<br>(1 in 6815) | 0.20<br>(1 in 511)   | 0.03<br>(1 in 3346) | 0.24<br>(1 in 415)  | 0.04<br>(1 in 2403) | 0.56<br>(1 in 178)  | 0.09<br>(1 in 1074) | 0.56<br>(1 in 178)  | 0.09<br>(1 in 1065) |
| Middle SDI            | Tracheal, bronchus, and lung cancer | 0.20<br>(1 in 508)   | 0.10<br>(1 in 961)   | 0.60<br>(1 in 166)   | 0.22<br>(1 in 450)  | 1.90<br>(1 in 52)    | 0.58<br>(1 in 171)  | 2.92<br>(1 in 34)   | 0.97<br>(1 in 103)  | 5.52<br>(1 in 18)   | 1.86<br>(1 in 54)   | 5.53<br>(1 in 18)   | 1.87<br>(1 in 54)   |
| Middle SDI            | Malignant skin melanoma             | 0.02<br>(1 in 4174)  | 0.02<br>(1 in 4497)  | 0.02<br>(1 in 5335)  | 0.01<br>(1 in 8361) | 0.02<br>(1 in 4846)  | 0.02<br>(1 in 5620) | 0.03<br>(1 in 3256) | 0.03<br>(1 in 3397) | 0.09<br>(1 in 1119) | 0.08<br>(1 in 1325) | 0.09<br>(1 in 1064) | 0.08<br>(1 in 1228) |
| Middle SDI            | Non-melanoma skin cancer            | 0.47<br>(1 in 213)   | 0.51<br>(1 in 196)   | 0.60<br>(1 in 165)   | 0.55<br>(1 in 182)  | 1.27<br>(1 in 79)    | 0.99<br>(1 in 101)  | 2.19<br>(1 in 46)   | 1.53<br>(1 in 65)   | 4.38<br>(1 in 23)   | 3.44<br>(1 in 29)   | 4.47<br>(1 in 22)   | 3.53<br>(1 in 28)   |
| Middle SDI            | Breast cancer                       | 0.01<br>(1 in 12716) | 1.00<br>(1 in 100)   | 0.01<br>(1 in 8289)  | 0.94<br>(1 in 106)  | 0.03<br>(1 in 3763)  | 1.08<br>(1 in 93)   | 0.03<br>(1 in 3682) | 1.07<br>(1 in 93)   | 0.07<br>(1 in 1373) | 3.99<br>(1 in 25)   | 0.07<br>(1 in 1358) | 4.04<br>(1 in 25)   |
| Middle SDI            | Cervical cancer                     | 0                    | 0.59<br>(1 in 169)   | 0                    | 0.38<br>(1 in 260)  | 0                    | 0.38<br>(1 in 264)  | 0                   | 0.34<br>(1 in 297)  | 0                   | 1.63<br>(1 in 61)   | 0                   | 1.68<br>(1 in 59)   |
| Middle SDI            | Uterine cancer                      | 0                    | 0.13<br>(1 in 762)   | 0                    | 0.22<br>(1 in 464)  | 0                    | 0.24<br>(1 in 423)  | 0                   | 0.20<br>(1 in 497)  | 0                   | 0.77<br>(1 in 129)  | 0                   | 0.78<br>(1 in 128)  |
| Middle SDI            | Ovarian cancer                      | 0                    | 0.17<br>(1 in 589)   | 0                    | 0.15<br>(1 in 688)  | 0                    | 0.18<br>(1 in 566)  | 0                   | 0.18<br>(1 in 553)  | 0                   | 0.64<br>(1 in 157)  | 0                   | 0.67<br>(1 in 149)  |
| Middle SDI            | Prostate cancer                     | 0.04<br>(1 in 2321)  | 0                    | 0.22<br>(1 in 456)   | 0                   | 0.95<br>(1 in 106)   | 0                   | 2.18<br>(1 in 46)   | 0                   | 3.36<br>(1 in 30)   | 0                   | 3.36<br>(1 in 30)   | 0                   |
| Middle SDI            | Testicular cancer                   | 0.07<br>(1 in 1368)  | 0                    | 0.01<br>(1 in 19072) | 0                   | 0.01<br>(1 in 13969) | 0                   | 0.01<br>(1 in 9199) | 0                   | 0.06<br>(1 in 1774) | 0                   | 0.10<br>(1 in 1038) | 0                   |
| Middle SDI            | Kidney cancer                       | 0.08<br>(1 in 1314)  | 0.07<br>(1 in 1454)  | 0.09<br>(1 in 1114)  | 0.05<br>(1 in 1985) | 0.14<br>(1 in 714)   | 0.08<br>(1 in 1297) | 0.19<br>(1 in 540)  | 0.09<br>(1 in 1059) | 0.47<br>(1 in 213)  | 0.26<br>(1 in 379)  | 0.49<br>(1 in 204)  | 0.29<br>(1 in 344)  |

| Location/SDI Quintile | Cancer                                  | Birth to age 49         |                         | Age 50 to 59            |                         | Age 60 to 69            |                         | Age 70 to 79           |                         | Age 30 to 70           |                        | Birth to age 79        |                        |
|-----------------------|-----------------------------------------|-------------------------|-------------------------|-------------------------|-------------------------|-------------------------|-------------------------|------------------------|-------------------------|------------------------|------------------------|------------------------|------------------------|
|                       |                                         | Male                    | Female                  | Male                    | Female                  | Male                    | Female                  | Male                   | Female                  | Male                   | Female                 | Male                   | Female                 |
| Middle SDI            | Bladder cancer                          | 0.04<br>(1 in<br>2485)  | 0.02<br>(1 in<br>6328)  | 0.08<br>(1 in<br>1211)  | 0.03<br>(1 in<br>3829)  | 0.23<br>(1 in<br>438)   | 0.05<br>(1 in<br>1819)  | 0.43<br>(1 in<br>234)  | 0.11<br>(1 in<br>902)   | 0.77<br>(1 in<br>129)  | 0.21<br>(1 in<br>486)  | 0.78<br>(1 in<br>129)  | 0.21<br>(1 in<br>482)  |
| Middle SDI            | Brain and central nervous system cancer | 0.18<br>(1 in<br>571)   | 0.14<br>(1 in<br>700)   | 0.08<br>(1 in<br>1271)  | 0.06<br>(1 in<br>1656)  | 0.13<br>(1 in<br>744)   | 0.10<br>(1 in<br>1036)  | 0.16<br>(1 in<br>642)  | 0.11<br>(1 in<br>900)   | 0.46<br>(1 in<br>218)  | 0.34<br>(1 in<br>294)  | 0.54<br>(1 in<br>184)  | 0.41<br>(1 in<br>244)  |
| Middle SDI            | Thyroid cancer                          | 0.05<br>(1 in<br>2185)  | 0.14<br>(1 in<br>729)   | 0.04<br>(1 in<br>2379)  | 0.09<br>(1 in<br>1148)  | 0.04<br>(1 in<br>2605)  | 0.09<br>(1 in<br>1092)  | 0.06<br>(1 in<br>1752) | 0.08<br>(1 in<br>1216)  | 0.18<br>(1 in<br>570)  | 0.38<br>(1 in<br>265)  | 0.18<br>(1 in<br>546)  | 0.40<br>(1 in<br>252)  |
| Middle SDI            | Mesothelioma                            | 0.01<br>(1 in<br>18055) | 0.00<br>(1 in<br>29947) | 0.01<br>(1 in<br>10114) | 0.00<br>(1 in<br>33846) | 0.01<br>(1 in<br>10674) | 0.00<br>(1 in<br>21954) | 0.02<br>(1 in<br>6489) | 0.01<br>(1 in<br>12984) | 0.04<br>(1 in<br>2534) | 0.02<br>(1 in<br>5579) | 0.04<br>(1 in<br>2488) | 0.02<br>(1 in<br>5391) |
| Middle SDI            | Hodgkin lymphoma                        | 0.03<br>(1 in<br>2893)  | 0.03<br>(1 in<br>3689)  | 0.01<br>(1 in<br>7571)  | 0.01<br>(1 in<br>19172) | 0.03<br>(1 in<br>3621)  | 0.01<br>(1 in<br>13865) | 0.03<br>(1 in<br>3651) | 0.01<br>(1 in<br>10343) | 0.08<br>(1 in<br>1189) | 0.03<br>(1 in<br>2997) | 0.10<br>(1 in<br>973)  | 0.05<br>(1 in<br>2033) |
| Middle SDI            | Non-Hodgkin lymphoma                    | 0.11<br>(1 in<br>929)   | 0.06<br>(1 in<br>1542)  | 0.09<br>(1 in<br>1088)  | 0.05<br>(1 in<br>1902)  | 0.16<br>(1 in<br>616)   | 0.10<br>(1 in<br>1016)  | 0.21<br>(1 in<br>483)  | 0.13<br>(1 in<br>751)   | 0.53<br>(1 in<br>188)  | 0.33<br>(1 in<br>306)  | 0.57<br>(1 in<br>176)  | 0.35<br>(1 in<br>287)  |
| Middle SDI            | Multiple myeloma                        | 0.01<br>(1 in<br>7099)  | 0.01<br>(1 in<br>9793)  | 0.03<br>(1 in<br>3771)  | 0.02<br>(1 in<br>4673)  | 0.05<br>(1 in<br>1861)  | 0.04<br>(1 in<br>2409)  | 0.08<br>(1 in<br>1333) | 0.06<br>(1 in<br>1637)  | 0.17<br>(1 in<br>597)  | 0.13<br>(1 in<br>754)  | 0.17<br>(1 in<br>591)  | 0.13<br>(1 in<br>745)  |
| Middle SDI            | Acute lymphoid leukemia                 | 0.05<br>(1 in<br>1828)  | 0.04<br>(1 in<br>2507)  | 0.01<br>(1 in<br>8353)  | 0.01<br>(1 in<br>12268) | 0.02<br>(1 in<br>4941)  | 0.01<br>(1 in<br>8268)  | 0.02<br>(1 in<br>4127) | 0.01<br>(1 in<br>6781)  | 0.07<br>(1 in<br>1392) | 0.05<br>(1 in<br>2182) | 0.11<br>(1 in<br>900)  | 0.07<br>(1 in<br>1336) |
| Middle SDI            | Chronic lymphoid leukemia               | 0.02<br>(1 in<br>6403)  | 0.01<br>(1 in<br>7974)  | 0.01<br>(1 in<br>7886)  | 0.01<br>(1 in<br>9866)  | 0.02<br>(1 in<br>4134)  | 0.02<br>(1 in<br>6352)  | 0.03<br>(1 in<br>3047) | 0.02<br>(1 in<br>5747)  | 0.08<br>(1 in<br>1232) | 0.05<br>(1 in<br>1892) | 0.09<br>(1 in<br>1173) | 0.06<br>(1 in<br>1792) |
| Middle SDI            | Acute myeloid leukemia                  | 0.04<br>(1 in<br>2303)  | 0.04<br>(1 in<br>2627)  | 0.02<br>(1 in<br>5488)  | 0.01<br>(1 in<br>8012)  | 0.03<br>(1 in<br>3535)  | 0.02<br>(1 in<br>5313)  | 0.04<br>(1 in<br>2253) | 0.03<br>(1 in<br>3673)  | 0.11<br>(1 in<br>900)  | 0.08<br>(1 in<br>1313) | 0.13<br>(1 in<br>745)  | 0.10<br>(1 in<br>1036) |
| Middle SDI            | Chronic myeloid leukemia                | 0.01<br>(1 in<br>9380)  | 0.01<br>(1 in<br>14119) | 0.01<br>(1 in<br>14873) | 0.00<br>(1 in<br>21113) | 0.01<br>(1 in<br>10395) | 0.01<br>(1 in<br>17306) | 0.02<br>(1 in<br>5859) | 0.01<br>(1 in<br>11448) | 0.04<br>(1 in<br>2414) | 0.02<br>(1 in<br>4083) | 0.04<br>(1 in<br>2269) | 0.03<br>(1 in<br>3798) |

| Location/SDI Quintile | Cancer                    | Birth to age 49    |                    | Age 50 to 59        |                     | Age 60 to 69        |                     | Age 70 to 79       |                     | Age 30 to 70       |                    | Birth to age 79    |                    |
|-----------------------|---------------------------|--------------------|--------------------|---------------------|---------------------|---------------------|---------------------|--------------------|---------------------|--------------------|--------------------|--------------------|--------------------|
|                       |                           | Male               | Female             | Male                | Female              | Male                | Female              | Male               | Female              | Male               | Female             | Male               | Female             |
| Middle SDI            | Other leukemia            | 0.13<br>(1 in 780) | 0.11<br>(1 in 939) | 0.03<br>(1 in 2952) | 0.03<br>(1 in 3779) | 0.08<br>(1 in 1238) | 0.05<br>(1 in 1961) | 0.13<br>(1 in 788) | 0.07<br>(1 in 1385) | 0.28<br>(1 in 363) | 0.18<br>(1 in 563) | 0.37<br>(1 in 271) | 0.26<br>(1 in 391) |
| Middle SDI            | Other malignant neoplasms | 0.22<br>(1 in 460) | 0.19<br>(1 in 535) | 0.13<br>(1 in 747)  | 0.09<br>(1 in 1088) | 0.30<br>(1 in 339)  | 0.17<br>(1 in 591)  | 0.43<br>(1 in 233) | 0.25<br>(1 in 399)  | 0.98<br>(1 in 102) | 0.60<br>(1 in 165) | 1.07<br>(1 in 93)  | 0.70<br>(1 in 143) |

*eTable 17: List of 22 level 2 causes in the GBD cause hierarchy*

| <b>Level 2 Causes</b>                        |
|----------------------------------------------|
| Cardiovascular Diseases                      |
| Chronic Respiratory Diseases                 |
| Diabetes and Kidney Diseases                 |
| Digestive Diseases                           |
| Enteric Infections                           |
| HIV/AIDS and Sexually Transmitted Infections |
| Maternal and Neonatal Disorders              |
| Mental Disorders                             |
| Musculoskeletal Disorders                    |
| Neglected Tropical Diseases and Malaria      |
| Neoplasms                                    |
| Neurological Disorders                       |
| Nutritional Deficiencies                     |
| Other Infectious Diseases                    |
| Other Non-communicable Diseases              |
| Respiratory Infections and Tuberculosis      |
| Self-harm and Interpersonal Violence         |
| Sense Organ Diseases                         |
| Skin and Subcutaneous Diseases               |
| Substance Use Disorders                      |
| Transport Injuries                           |
| Unintentional Injuries                       |

*eTable 18: Global number of incidence, prevalence, YLDs, deaths, YLLs, DALYs for both sexes, 1990 and 2017 for all level 2 GBD causes*

| Measure | Cause Name                                   | Year | Number      | Lower 95% UI | Upper 95% UI |
|---------|----------------------------------------------|------|-------------|--------------|--------------|
| DALYs   | Cardiovascular diseases                      | 2017 | 365,869,825 | 355,162,644  | 376,747,292  |
| DALYs   | Neoplasms                                    | 2017 | 233,513,217 | 228,805,646  | 237,972,854  |
| DALYs   | Maternal and neonatal disorders              | 2017 | 197,578,932 | 186,854,664  | 209,023,949  |
| DALYs   | Respiratory infections and tuberculosis      | 2017 | 159,903,714 | 151,790,181  | 168,292,899  |
| DALYs   | Musculoskeletal disorders                    | 2017 | 138,723,945 | 101,940,849  | 182,552,790  |
| DALYs   | Mental disorders                             | 2017 | 122,763,812 | 91,637,784   | 157,901,472  |
| DALYs   | Other non-communicable diseases              | 2017 | 121,886,702 | 103,879,215  | 143,822,110  |
| DALYs   | Chronic respiratory diseases                 | 2017 | 112,316,763 | 104,649,691  | 119,692,783  |
| DALYs   | Neurological disorders                       | 2017 | 111,166,327 | 88,499,698   | 138,526,015  |
| DALYs   | Unintentional injuries                       | 2017 | 105,940,182 | 94,243,724   | 119,496,121  |
| DALYs   | Diabetes and kidney diseases                 | 2017 | 104,001,226 | 90,075,147   | 120,518,945  |
| DALYs   | Enteric infections                           | 2017 | 95,209,183  | 83,914,445   | 112,177,985  |
| DALYs   | Digestive diseases                           | 2017 | 85,288,128  | 77,994,367   | 94,532,822   |
| DALYs   | Transport injuries                           | 2017 | 75,332,128  | 71,039,428   | 79,823,272   |
| DALYs   | Self-harm and interpersonal violence         | 2017 | 71,133,307  | 68,080,957   | 73,745,480   |
| DALYs   | Sense organ diseases                         | 2017 | 66,576,077  | 44,700,752   | 95,675,085   |
| DALYs   | HIV/AIDS and sexually transmitted infections | 2017 | 65,919,941  | 58,660,134   | 74,697,873   |
| DALYs   | Neglected tropical diseases and malaria      | 2017 | 62,279,047  | 48,556,871   | 79,850,662   |
| DALYs   | Nutritional deficiencies                     | 2017 | 58,034,285  | 44,284,298   | 76,877,407   |
| DALYs   | Other infectious diseases                    | 2017 | 57,065,192  | 48,750,501   | 67,270,886   |

| Measure | Cause Name                              | Year | Number      | Lower 95% UI | Upper 95% UI |
|---------|-----------------------------------------|------|-------------|--------------|--------------|
| DALYs   | Substance use disorders                 | 2017 | 44,650,333  | 35,859,543   | 54,047,325   |
| DALYs   | Skin and subcutaneous diseases          | 2017 | 44,139,790  | 29,932,029   | 64,244,621   |
| DALYs   | Respiratory infections and tuberculosis | 1990 | 309,249,358 | 287,109,014  | 328,732,086  |
| DALYs   | Maternal and neonatal disorders         | 1990 | 297,652,248 | 280,126,263  | 316,538,704  |
| DALYs   | Cardiovascular diseases                 | 1990 | 266,817,904 | 260,266,782  | 273,590,216  |
| DALYs   | Enteric infections                      | 1990 | 199,281,798 | 170,533,635  | 226,024,752  |
| DALYs   | Other infectious diseases               | 1990 | 159,996,995 | 123,375,053  | 217,837,555  |
| DALYs   | Neoplasms                               | 1990 | 159,583,902 | 155,128,690  | 165,455,157  |
| DALYs   | Other non-communicable diseases         | 1990 | 128,171,244 | 113,077,150  | 148,016,766  |
| DALYs   | Unintentional injuries                  | 1990 | 126,209,239 | 115,160,961  | 136,811,492  |
| DALYs   | Chronic respiratory diseases            | 1990 | 99,103,908  | 91,717,116   | 104,764,799  |
| DALYs   | Neglected tropical diseases and malaria | 1990 | 92,881,784  | 61,865,316   | 147,002,267  |
| DALYs   | Nutritional deficiencies                | 1990 | 92,440,346  | 74,687,081   | 115,060,526  |
| DALYs   | Musculoskeletal disorders               | 1990 | 83,700,570  | 61,719,746   | 110,423,940  |
| DALYs   | Mental disorders                        | 1990 | 82,174,005  | 61,252,297   | 106,197,991  |
| DALYs   | Transport injuries                      | 1990 | 75,541,558  | 70,729,138   | 79,946,605   |
| DALYs   | Neurological disorders                  | 1990 | 68,944,493  | 54,331,793   | 86,705,451   |
| DALYs   | Self-harm and interpersonal violence    | 1990 | 67,805,441  | 63,282,481   | 70,692,660   |
| DALYs   | Digestive diseases                      | 1990 | 67,393,607  | 62,188,680   | 73,641,123   |
| DALYs   | Diabetes and kidney diseases            | 1990 | 54,837,205  | 48,420,026   | 62,647,669   |
| DALYs   | Sense organ diseases                    | 1990 | 37,792,611  | 25,518,303   | 54,299,006   |

| Measure | Cause Name                                   | Year | Number     | Lower 95% UI | Upper 95% UI |
|---------|----------------------------------------------|------|------------|--------------|--------------|
| DALYs   | HIV/AIDS and sexually transmitted infections | 1990 | 33,662,794 | 26,056,389   | 43,963,291   |
| DALYs   | Skin and subcutaneous diseases               | 1990 | 31,244,325 | 21,035,604   | 45,486,196   |
| DALYs   | Substance use disorders                      | 1990 | 27,524,799 | 21,814,247   | 33,432,553   |
| Deaths  | Cardiovascular diseases                      | 2017 | 17,790,949 | 17,527,068   | 18,042,674   |
| Deaths  | Neoplasms                                    | 2017 | 9,556,245  | 9,395,666    | 9,692,259    |
| Deaths  | Chronic respiratory diseases                 | 2017 | 3,914,196  | 3,790,579    | 4,044,819    |
| Deaths  | Respiratory infections and tuberculosis      | 2017 | 3,752,338  | 3,629,350    | 3,889,284    |
| Deaths  | Neurological disorders                       | 2017 | 3,094,164  | 3,039,575    | 3,142,640    |
| Deaths  | Diabetes and kidney diseases                 | 2017 | 2,611,200  | 2,557,844    | 2,667,162    |
| Deaths  | Digestive diseases                           | 2017 | 2,377,685  | 2,295,066    | 2,517,953    |
| Deaths  | Maternal and neonatal disorders              | 2017 | 1,977,409  | 1,890,055    | 2,060,599    |
| Deaths  | Unintentional injuries                       | 2017 | 1,804,870  | 1,695,711    | 1,872,031    |
| Deaths  | Enteric infections                           | 2017 | 1,765,992  | 1,397,988    | 2,385,974    |
| Deaths  | Self-harm and interpersonal violence         | 2017 | 1,344,849  | 1,283,066    | 1,380,444    |
| Deaths  | Transport injuries                           | 2017 | 1,335,004  | 1,289,145    | 1,369,543    |
| Deaths  | Other non-communicable diseases              | 2017 | 1,153,269  | 1,101,794    | 1,208,344    |
| Deaths  | HIV/AIDS and sexually transmitted infections | 2017 | 1,073,585  | 983,342      | 1,182,438    |
| Deaths  | Other infectious diseases                    | 2017 | 830,494    | 732,153      | 947,812      |
| Deaths  | Neglected tropical diseases and malaria      | 2017 | 720,060    | 530,675      | 938,820      |
| Deaths  | Substance use disorders                      | 2017 | 351,547    | 334,103      | 362,720      |
| Deaths  | Nutritional deficiencies                     | 2017 | 269,997    | 249,250      | 295,457      |



| Measure | Cause Name                                   | Year | Number     | Lower 95% UI | Upper 95% UI |
|---------|----------------------------------------------|------|------------|--------------|--------------|
| Deaths  | Musculoskeletal disorders                    | 2017 | 121,269    | 105,635      | 126,226      |
| Deaths  | Skin and subcutaneous diseases               | 2017 | 100,284    | 65,291       | 131,675      |
| Deaths  | Mental disorders                             | 2017 | 326        | 296          | 357          |
| Deaths  | Cardiovascular diseases                      | 1990 | 11,941,533 | 11,784,719   | 12,179,150   |
| Deaths  | Neoplasms                                    | 1990 | 5,753,106  | 5,660,626    | 5,902,948    |
| Deaths  | Respiratory infections and tuberculosis      | 1990 | 5,054,751  | 4,778,503    | 5,282,255    |
| Deaths  | Chronic respiratory diseases                 | 1990 | 3,317,205  | 3,011,594    | 3,425,405    |
| Deaths  | Maternal and neonatal disorders              | 1990 | 3,311,471  | 3,128,143    | 3,516,311    |
| Deaths  | Enteric infections                           | 1990 | 2,856,337  | 2,366,559    | 3,394,724    |
| Deaths  | Other infectious diseases                    | 1990 | 2,018,856  | 1,588,420    | 2,690,138    |
| Deaths  | Unintentional injuries                       | 1990 | 1,813,444  | 1,693,822    | 1,917,316    |
| Deaths  | Digestive diseases                           | 1990 | 1,714,979  | 1,609,155    | 1,778,129    |
| Deaths  | Neurological disorders                       | 1990 | 1,353,808  | 1,324,894    | 1,393,024    |
| Deaths  | Diabetes and kidney diseases                 | 1990 | 1,235,855  | 1,202,582    | 1,277,753    |
| Deaths  | Transport injuries                           | 1990 | 1,228,048  | 1,168,472    | 1,290,344    |
| Deaths  | Self-harm and interpersonal violence         | 1990 | 1,219,001  | 1,127,143    | 1,265,197    |
| Deaths  | Other non-communicable diseases              | 1990 | 1,216,750  | 1,125,135    | 1,384,186    |
| Deaths  | Neglected tropical diseases and malaria      | 1990 | 1,093,434  | 668,467      | 1,866,938    |
| Deaths  | Nutritional deficiencies                     | 1990 | 568,075    | 486,089      | 638,305      |
| Deaths  | HIV/AIDS and sexually transmitted infections | 1990 | 489,277    | 393,772      | 609,195      |
| Deaths  | Substance use disorders                      | 1990 | 183,420    | 177,922      | 191,186      |

| Measure   | Cause Name                                   | Year | Number         | Lower 95% UI   | Upper 95% UI   |
|-----------|----------------------------------------------|------|----------------|----------------|----------------|
| Deaths    | Musculoskeletal disorders                    | 1990 | 64,688         | 59,945         | 70,046         |
| Deaths    | Skin and subcutaneous diseases               | 1990 | 44,097         | 28,280         | 53,511         |
| Deaths    | Mental disorders                             | 1990 | 180            | 165            | 218            |
| Incidence | Respiratory infections and tuberculosis      | 2017 | 17,942,622,200 | 16,102,037,352 | 20,038,445,370 |
| Incidence | Enteric infections                           | 2017 | 6,307,792,414  | 5,822,111,274  | 6,830,241,351  |
| Incidence | Other non-communicable diseases              | 2017 | 4,209,629,187  | 3,838,650,712  | 4,611,874,192  |
| Incidence | Skin and subcutaneous diseases               | 2017 | 4,185,971,292  | 3,971,760,520  | 4,391,218,151  |
| Incidence | Nutritional deficiencies                     | 2017 | 1,186,745,815  | 1,089,728,901  | 1,283,530,022  |
| Incidence | Neurological disorders                       | 2017 | 1,006,294,496  | 907,590,708    | 1,098,468,897  |
| Incidence | HIV/AIDS and sexually transmitted infections | 2017 | 769,111,205    | 694,471,147    | 850,896,008    |
| Incidence | Other infectious diseases                    | 2017 | 478,720,559    | 450,498,254    | 511,601,597    |
| Incidence | Digestive diseases                           | 2017 | 465,978,615    | 429,600,439    | 500,015,074    |
| Incidence | Unintentional injuries                       | 2017 | 415,410,278    | 390,092,604    | 441,943,041    |
| Incidence | Neglected tropical diseases and malaria      | 2017 | 357,652,091    | 301,519,177    | 431,965,055    |
| Incidence | Mental disorders                             | 2017 | 336,996,264    | 315,596,544    | 362,049,506    |
| Incidence | Musculoskeletal disorders                    | 2017 | 334,744,943    | 309,934,048    | 363,175,826    |
| Incidence | Maternal and neonatal disorders              | 2017 | 101,960,798    | 94,724,853     | 109,282,804    |
| Incidence | Cardiovascular diseases                      | 2017 | 72,721,167     | 70,388,093     | 75,264,106     |
| Incidence | Transport injuries                           | 2017 | 63,920,593     | 56,848,496     | 71,592,218     |
| Incidence | Chronic respiratory diseases                 | 2017 | 62,161,350     | 55,134,836     | 69,320,715     |
| Incidence | Substance use disorders                      | 2017 | 60,099,555     | 53,685,605     | 67,048,695     |

| Measure   | Cause Name                                   | Year | Number         | Lower 95% UI   | Upper 95% UI   |
|-----------|----------------------------------------------|------|----------------|----------------|----------------|
| Incidence | Diabetes and kidney diseases                 | 2017 | 43,444,563     | 40,700,271     | 46,375,597     |
| Incidence | Self-harm and interpersonal violence         | 2017 | 41,379,417     | 37,344,547     | 45,834,432     |
| Incidence | Neoplasms                                    | 2017 | 24,361,623     | 21,911,282     | 27,310,277     |
| Incidence | Sense organ diseases                         | 2017 | -              | -              | -              |
| Incidence | Respiratory infections and tuberculosis      | 1990 | 13,502,660,152 | 12,007,693,041 | 15,052,281,627 |
| Incidence | Enteric infections                           | 1990 | 4,162,053,408  | 3,839,162,594  | 4,529,163,204  |
| Incidence | Other non-communicable diseases              | 1990 | 3,159,707,381  | 2,856,796,112  | 3,495,814,318  |
| Incidence | Skin and subcutaneous diseases               | 1990 | 2,850,889,202  | 2,704,698,348  | 3,008,990,166  |
| Incidence | Nutritional deficiencies                     | 1990 | 895,796,227    | 822,831,524    | 969,303,058    |
| Incidence | Neurological disorders                       | 1990 | 688,458,508    | 617,026,906    | 756,703,630    |
| Incidence | HIV/AIDS and sexually transmitted infections | 1990 | 541,311,192    | 487,195,165    | 601,284,841    |
| Incidence | Other infectious diseases                    | 1990 | 453,739,592    | 401,443,447    | 541,991,902    |
| Incidence | Unintentional injuries                       | 1990 | 280,906,990    | 265,226,755    | 297,904,952    |
| Incidence | Digestive diseases                           | 1990 | 280,585,014    | 258,118,127    | 303,159,560    |
| Incidence | Neglected tropical diseases and malaria      | 1990 | 276,404,045    | 236,287,640    | 321,720,611    |
| Incidence | Mental disorders                             | 1990 | 230,730,647    | 215,520,378    | 248,672,632    |
| Incidence | Musculoskeletal disorders                    | 1990 | 211,801,995    | 194,524,169    | 231,091,319    |
| Incidence | Maternal and neonatal disorders              | 1990 | 95,589,927     | 88,248,268     | 103,319,698    |
| Incidence | Chronic respiratory diseases                 | 1990 | 49,341,401     | 43,429,933     | 55,491,013     |
| Incidence | Substance use disorders                      | 1990 | 41,669,778     | 37,393,249     | 46,338,692     |
| Incidence | Transport injuries                           | 1990 | 40,619,361     | 36,859,527     | 44,752,963     |

| Measure    | Cause Name                                   | Year | Number        | Lower 95% UI  | Upper 95% UI  |
|------------|----------------------------------------------|------|---------------|---------------|---------------|
| Incidence  | Cardiovascular diseases                      | 1990 | 39,828,826    | 38,585,410    | 41,150,293    |
| Incidence  | Self-harm and interpersonal violence         | 1990 | 32,537,950    | 29,978,817    | 35,293,359    |
| Incidence  | Diabetes and kidney diseases                 | 1990 | 23,099,044    | 21,832,557    | 24,399,673    |
| Incidence  | Neoplasms                                    | 1990 | 12,144,252    | 10,595,310    | 14,146,112    |
| Incidence  | Sense organ diseases                         | 1990 | -             | -             | -             |
| Prevalence | Other non-communicable diseases              | 2017 | 4,916,184,783 | 4,793,498,008 | 5,046,526,699 |
| Prevalence | Neurological disorders                       | 2017 | 3,121,435,268 | 2,951,124,541 | 3,316,267,996 |
| Prevalence | Respiratory infections and tuberculosis      | 2017 | 2,187,289,983 | 1,979,143,104 | 2,449,760,681 |
| Prevalence | Digestive diseases                           | 2017 | 2,049,831,181 | 1,983,314,286 | 2,122,941,636 |
| Prevalence | Sense organ diseases                         | 2017 | 2,035,736,962 | 1,994,115,837 | 2,079,908,632 |
| Prevalence | Skin and subcutaneous diseases               | 2017 | 1,974,238,419 | 1,916,671,830 | 2,034,645,664 |
| Prevalence | Nutritional deficiencies                     | 2017 | 1,862,030,823 | 1,806,258,916 | 1,921,493,541 |
| Prevalence | Musculoskeletal disorders                    | 2017 | 1,312,131,317 | 1,248,058,740 | 1,383,422,599 |
| Prevalence | Neglected tropical diseases and malaria      | 2017 | 1,278,896,491 | 1,223,506,131 | 1,343,059,250 |
| Prevalence | HIV/AIDS and sexually transmitted infections | 2017 | 1,238,129,159 | 1,129,539,606 | 1,359,466,048 |
| Prevalence | Diabetes and kidney diseases                 | 2017 | 1,011,116,584 | 962,767,855   | 1,065,061,459 |
| Prevalence | Mental disorders                             | 2017 | 970,812,351   | 923,455,434   | 1,020,930,608 |
| Prevalence | Unintentional injuries                       | 2017 | 935,298,172   | 876,022,470   | 1,008,077,126 |
| Prevalence | Chronic respiratory diseases                 | 2017 | 544,899,165   | 506,937,518   | 584,858,359   |
| Prevalence | Cardiovascular diseases                      | 2017 | 485,620,950   | 468,031,728   | 504,964,407   |
| Prevalence | Self-harm and interpersonal violence         | 2017 | 351,859,587   | 316,749,655   | 390,321,671   |

| Measure    | Cause Name                                   | Year | Number        | Lower 95% UI  | Upper 95% UI  |
|------------|----------------------------------------------|------|---------------|---------------|---------------|
| Prevalence | Transport injuries                           | 2017 | 226,305,638   | 209,529,544   | 244,291,124   |
| Prevalence | Substance use disorders                      | 2017 | 175,588,843   | 161,747,600   | 189,304,254   |
| Prevalence | Maternal and neonatal disorders              | 2017 | 158,835,793   | 140,427,731   | 179,076,822   |
| Prevalence | Other infectious diseases                    | 2017 | 101,451,535   | 97,425,139    | 105,559,560   |
| Prevalence | Neoplasms                                    | 2017 | 100,482,889   | 98,189,805    | 102,850,506   |
| Prevalence | Enteric infections                           | 2017 | 93,304,411    | 86,780,482    | 99,732,495    |
| Prevalence | Other non-communicable diseases              | 1990 | 3,474,628,536 | 3,374,989,918 | 3,580,497,968 |
| Prevalence | Neurological disorders                       | 1990 | 2,068,430,109 | 1,947,827,470 | 2,207,500,340 |
| Prevalence | Respiratory infections and tuberculosis      | 1990 | 1,697,934,680 | 1,523,118,758 | 1,903,590,782 |
| Prevalence | Nutritional deficiencies                     | 1990 | 1,641,183,577 | 1,596,654,178 | 1,687,460,167 |
| Prevalence | Neglected tropical diseases and malaria      | 1990 | 1,630,980,213 | 1,557,375,484 | 1,707,546,817 |
| Prevalence | Skin and subcutaneous diseases               | 1990 | 1,363,280,022 | 1,318,958,274 | 1,410,152,783 |
| Prevalence | Digestive diseases                           | 1990 | 1,224,973,046 | 1,179,097,010 | 1,273,152,546 |
| Prevalence | Sense organ diseases                         | 1990 | 1,171,843,888 | 1,143,859,597 | 1,199,940,347 |
| Prevalence | Musculoskeletal disorders                    | 1990 | 770,756,735   | 728,826,864   | 816,462,318   |
| Prevalence | HIV/AIDS and sexually transmitted infections | 1990 | 740,179,879   | 676,989,227   | 812,521,414   |
| Prevalence | Mental disorders                             | 1990 | 670,158,920   | 632,356,809   | 710,324,373   |
| Prevalence | Unintentional injuries                       | 1990 | 580,747,757   | 543,305,900   | 624,026,558   |
| Prevalence | Diabetes and kidney diseases                 | 1990 | 519,023,373   | 494,200,000   | 546,128,664   |
| Prevalence | Chronic respiratory diseases                 | 1990 | 389,713,748   | 362,943,030   | 416,351,401   |
| Prevalence | Cardiovascular diseases                      | 1990 | 265,095,201   | 254,942,409   | 275,685,322   |

| Measure    | Cause Name                           | Year | Number      | Lower 95% UI | Upper 95% UI |
|------------|--------------------------------------|------|-------------|--------------|--------------|
| Prevalence | Self-harm and interpersonal violence | 1990 | 230,846,459 | 206,949,815  | 257,232,508  |
| Prevalence | Transport injuries                   | 1990 | 129,425,989 | 119,576,669  | 139,934,827  |
| Prevalence | Substance use disorders              | 1990 | 117,560,678 | 107,615,832  | 126,965,440  |
| Prevalence | Maternal and neonatal disorders      | 1990 | 91,996,021  | 82,385,132   | 102,937,270  |
| Prevalence | Other infectious diseases            | 1990 | 89,491,596  | 85,874,032   | 93,739,482   |
| Prevalence | Enteric infections                   | 1990 | 64,260,896  | 60,005,607   | 68,832,846   |
| Prevalence | Neoplasms                            | 1990 | 45,616,387  | 44,766,119   | 46,545,262   |
| YLDs       | Musculoskeletal disorders            | 2017 | 135,881,289 | 99,022,584   | 179,645,044  |
| YLDs       | Mental disorders                     | 2017 | 122,746,275 | 91,620,791   | 157,883,611  |
| YLDs       | Neurological disorders               | 2017 | 73,161,793  | 50,721,867   | 100,409,886  |
| YLDs       | Sense organ diseases                 | 2017 | 66,576,077  | 44,700,752   | 95,675,085   |
| YLDs       | Other non-communicable diseases      | 2017 | 53,645,926  | 36,899,697   | 74,479,326   |
| YLDs       | Diabetes and kidney diseases         | 2017 | 45,884,350  | 32,018,931   | 62,235,263   |
| YLDs       | Chronic respiratory diseases         | 2017 | 44,311,836  | 36,751,640   | 51,407,142   |
| YLDs       | Nutritional deficiencies             | 2017 | 42,376,235  | 28,774,037   | 61,009,925   |
| YLDs       | Skin and subcutaneous diseases       | 2017 | 41,621,861  | 27,371,732   | 61,859,479   |
| YLDs       | Unintentional injuries               | 2017 | 36,509,677  | 26,384,700   | 49,052,539   |
| YLDs       | Cardiovascular diseases              | 2017 | 35,697,253  | 26,428,225   | 45,510,278   |
| YLDs       | Substance use disorders              | 2017 | 31,052,753  | 22,215,188   | 40,495,983   |
| YLDs       | Maternal and neonatal disorders      | 2017 | 29,894,299  | 22,429,873   | 38,381,611   |
| YLDs       | Digestive diseases                   | 2017 | 19,939,736  | 13,858,238   | 27,973,060   |

| Measure | Cause Name                                   | Year | Number     | Lower 95% UI | Upper 95% UI |
|---------|----------------------------------------------|------|------------|--------------|--------------|
| YLDs    | Neglected tropical diseases and malaria      | 2017 | 13,622,881 | 9,498,303    | 18,673,320   |
| YLDs    | Transport injuries                           | 2017 | 13,394,368 | 9,586,914    | 17,860,967   |
| YLDs    | Respiratory infections and tuberculosis      | 2017 | 11,670,255 | 7,845,864    | 16,749,663   |
| YLDs    | Enteric infections                           | 2017 | 10,583,692 | 7,283,322    | 14,516,077   |
| YLDs    | Neoplasms                                    | 2017 | 7,775,158  | 5,747,908    | 10,028,878   |
| YLDs    | Self-harm and interpersonal violence         | 2017 | 7,270,424  | 5,637,234    | 9,008,320    |
| YLDs    | HIV/AIDS and sexually transmitted infections | 2017 | 5,369,731  | 3,783,642    | 7,272,173    |
| YLDs    | Other infectious diseases                    | 2017 | 4,056,632  | 2,835,524    | 5,535,761    |
| YLDs    | Mental disorders                             | 1990 | 82,163,903 | 61,242,855   | 106,188,391  |
| YLDs    | Musculoskeletal disorders                    | 1990 | 81,879,380 | 59,968,022   | 108,618,752  |
| YLDs    | Nutritional deficiencies                     | 1990 | 50,121,716 | 33,951,502   | 71,174,016   |
| YLDs    | Neurological disorders                       | 1990 | 45,973,047 | 31,380,768   | 63,585,106   |
| YLDs    | Other non-communicable diseases              | 1990 | 37,794,080 | 26,384,847   | 52,599,757   |
| YLDs    | Sense organ diseases                         | 1990 | 37,792,611 | 25,518,303   | 54,299,006   |
| YLDs    | Skin and subcutaneous diseases               | 1990 | 29,698,449 | 19,377,040   | 43,898,309   |
| YLDs    | Chronic respiratory diseases                 | 1990 | 29,593,127 | 24,365,930   | 34,646,110   |
| YLDs    | Unintentional injuries                       | 1990 | 24,103,866 | 17,493,924   | 32,208,061   |
| YLDs    | Diabetes and kidney diseases                 | 1990 | 21,099,507 | 14,928,495   | 28,830,771   |
| YLDs    | Substance use disorders                      | 1990 | 19,823,842 | 14,141,024   | 25,685,811   |
| YLDs    | Cardiovascular diseases                      | 1990 | 19,023,712 | 14,033,706   | 24,347,894   |
| YLDs    | Maternal and neonatal disorders              | 1990 | 16,316,795 | 12,406,447   | 20,557,421   |

| Measure | Cause Name                                   | Year | Number      | Lower 95% UI | Upper 95% UI |
|---------|----------------------------------------------|------|-------------|--------------|--------------|
| YLDs    | Neglected tropical diseases and malaria      | 1990 | 14,829,129  | 10,337,134   | 20,437,316   |
| YLDs    | Digestive diseases                           | 1990 | 12,623,835  | 8,751,361    | 17,722,376   |
| YLDs    | Respiratory infections and tuberculosis      | 1990 | 9,144,262   | 6,171,066    | 13,115,875   |
| YLDs    | Transport injuries                           | 1990 | 8,290,585   | 6,015,733    | 10,939,425   |
| YLDs    | Enteric infections                           | 1990 | 7,357,950   | 5,073,549    | 10,084,387   |
| YLDs    | Self-harm and interpersonal violence         | 1990 | 5,057,581   | 3,866,844    | 6,282,639    |
| YLDs    | Other infectious diseases                    | 1990 | 3,882,144   | 2,707,877    | 5,327,236    |
| YLDs    | Neoplasms                                    | 1990 | 3,470,836   | 2,567,213    | 4,465,990    |
| YLDs    | HIV/AIDS and sexually transmitted infections | 1990 | 1,879,849   | 1,292,767    | 2,693,337    |
| YLLs    | Cardiovascular diseases                      | 2017 | 330,172,573 | 324,899,269  | 335,159,851  |
| YLLs    | Neoplasms                                    | 2017 | 225,738,059 | 221,608,831  | 229,322,358  |
| YLLs    | Maternal and neonatal disorders              | 2017 | 167,684,633 | 160,060,651  | 174,918,240  |
| YLLs    | Respiratory infections and tuberculosis      | 2017 | 148,233,459 | 141,335,115  | 155,291,373  |
| YLLs    | Enteric infections                           | 2017 | 84,625,491  | 73,770,610   | 100,720,201  |
| YLLs    | Unintentional injuries                       | 2017 | 69,430,505  | 64,685,078   | 72,366,778   |
| YLLs    | Other non-communicable diseases              | 2017 | 68,240,776  | 64,835,446   | 72,452,095   |
| YLLs    | Chronic respiratory diseases                 | 2017 | 68,004,927  | 65,869,370   | 70,592,230   |
| YLLs    | Digestive diseases                           | 2017 | 65,348,392  | 62,343,905   | 69,371,349   |
| YLLs    | Self-harm and interpersonal violence         | 2017 | 63,862,883  | 61,029,858   | 65,755,681   |
| YLLs    | Transport injuries                           | 2017 | 61,937,760  | 60,031,222   | 63,736,519   |
| YLLs    | HIV/AIDS and sexually transmitted infections | 2017 | 60,550,210  | 53,533,737   | 69,156,338   |



| Measure | Cause Name                              | Year | Number      | Lower 95% UI | Upper 95% UI |
|---------|-----------------------------------------|------|-------------|--------------|--------------|
| YLLs    | Diabetes and kidney diseases            | 2017 | 58,116,876  | 56,801,498   | 59,525,664   |
| YLLs    | Other infectious diseases               | 2017 | 53,008,560  | 44,785,978   | 63,000,380   |
| YLLs    | Neglected tropical diseases and malaria | 2017 | 48,656,166  | 35,574,594   | 64,934,228   |
| YLLs    | Neurological disorders                  | 2017 | 38,004,534  | 37,134,801   | 39,174,578   |
| YLLs    | Nutritional deficiencies                | 2017 | 15,658,050  | 14,051,478   | 17,506,635   |
| YLLs    | Substance use disorders                 | 2017 | 13,597,580  | 12,979,527   | 14,033,332   |
| YLLs    | Musculoskeletal disorders               | 2017 | 2,842,656   | 2,440,732    | 2,953,062    |
| YLLs    | Skin and subcutaneous diseases          | 2017 | 2,517,929   | 1,703,324    | 3,283,772    |
| YLLs    | Mental disorders                        | 2017 | 17,537      | 15,870       | 19,228       |
| YLLs    | Respiratory infections and tuberculosis | 1990 | 300,105,095 | 278,005,075  | 318,858,702  |
| YLLs    | Maternal and neonatal disorders         | 1990 | 281,335,453 | 265,219,348  | 299,507,165  |
| YLLs    | Cardiovascular diseases                 | 1990 | 247,794,192 | 243,663,436  | 252,576,620  |
| YLLs    | Enteric infections                      | 1990 | 191,923,848 | 163,901,789  | 218,985,240  |
| YLLs    | Other infectious diseases               | 1990 | 156,114,851 | 119,890,267  | 213,154,068  |
| YLLs    | Neoplasms                               | 1990 | 156,113,066 | 151,954,276  | 161,928,310  |
| YLLs    | Unintentional injuries                  | 1990 | 102,105,373 | 93,583,569   | 109,892,883  |
| YLLs    | Other non-communicable diseases         | 1990 | 90,377,163  | 82,271,811   | 104,690,838  |
| YLLs    | Neglected tropical diseases and malaria | 1990 | 78,052,655  | 47,529,739   | 131,964,510  |
| YLLs    | Chronic respiratory diseases            | 1990 | 69,510,781  | 63,240,096   | 71,850,084   |
| YLLs    | Transport injuries                      | 1990 | 67,250,972  | 63,271,345   | 71,109,915   |
| YLLs    | Self-harm and interpersonal violence    | 1990 | 62,747,860  | 58,214,706   | 65,136,524   |

| Measure | Cause Name                                   | Year | Number     | Lower 95% UI | Upper 95% UI |
|---------|----------------------------------------------|------|------------|--------------|--------------|
| YLLs    | Digestive diseases                           | 1990 | 54,769,772 | 51,254,564   | 58,374,920   |
| YLLs    | Nutritional deficiencies                     | 1990 | 42,318,629 | 35,764,357   | 48,169,160   |
| YLLs    | Diabetes and kidney diseases                 | 1990 | 33,737,699 | 32,568,164   | 35,023,610   |
| YLLs    | HIV/AIDS and sexually transmitted infections | 1990 | 31,782,945 | 24,110,761   | 42,038,212   |
| YLLs    | Neurological disorders                       | 1990 | 22,971,446 | 21,064,118   | 24,355,263   |
| YLLs    | Substance use disorders                      | 1990 | 7,700,956  | 7,465,383    | 8,027,134    |
| YLLs    | Musculoskeletal disorders                    | 1990 | 1,821,191  | 1,674,988    | 2,034,286    |
| YLLs    | Skin and subcutaneous diseases               | 1990 | 1,545,876  | 915,953      | 1,837,119    |
| YLLs    | Mental disorders                             | 1990 | 10,101     | 9,233        | 12,330       |

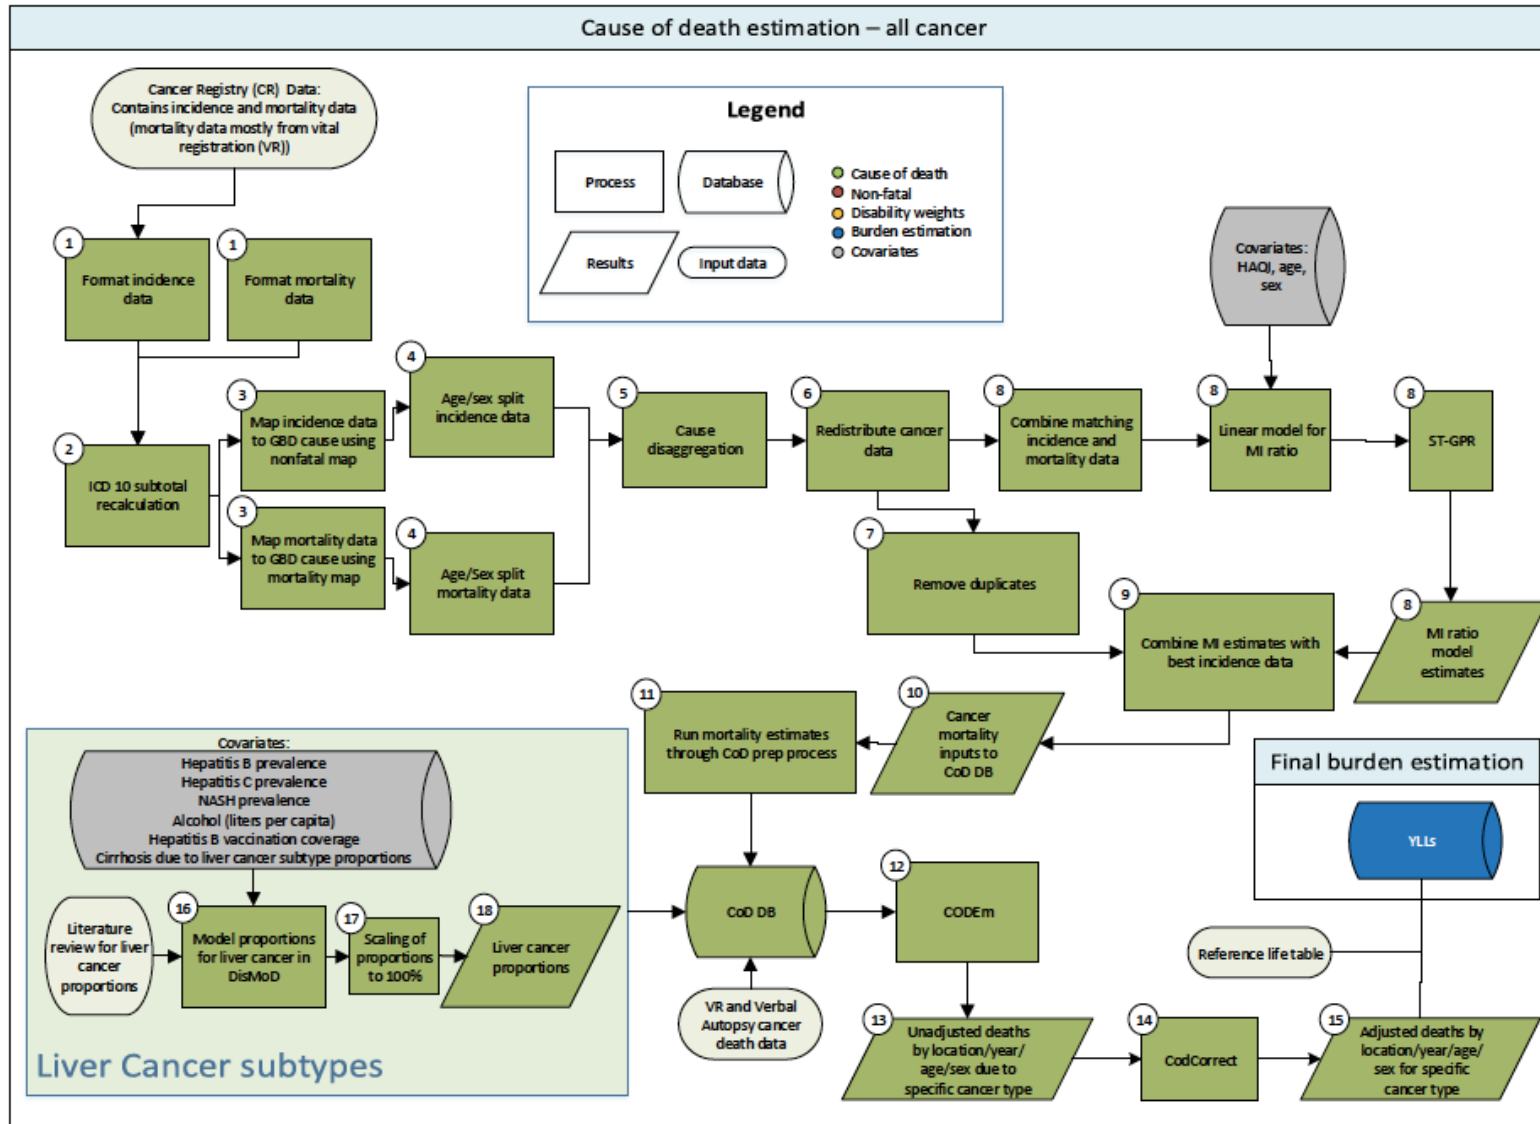

Abbreviations: ICD: International classification of diseases; DB: database, ST-GPR: Space-time smoothing, Gaussian process regression, COD: Causes of death

eFigure 1: Flowchart GBD cancer mortality, YLL estimation

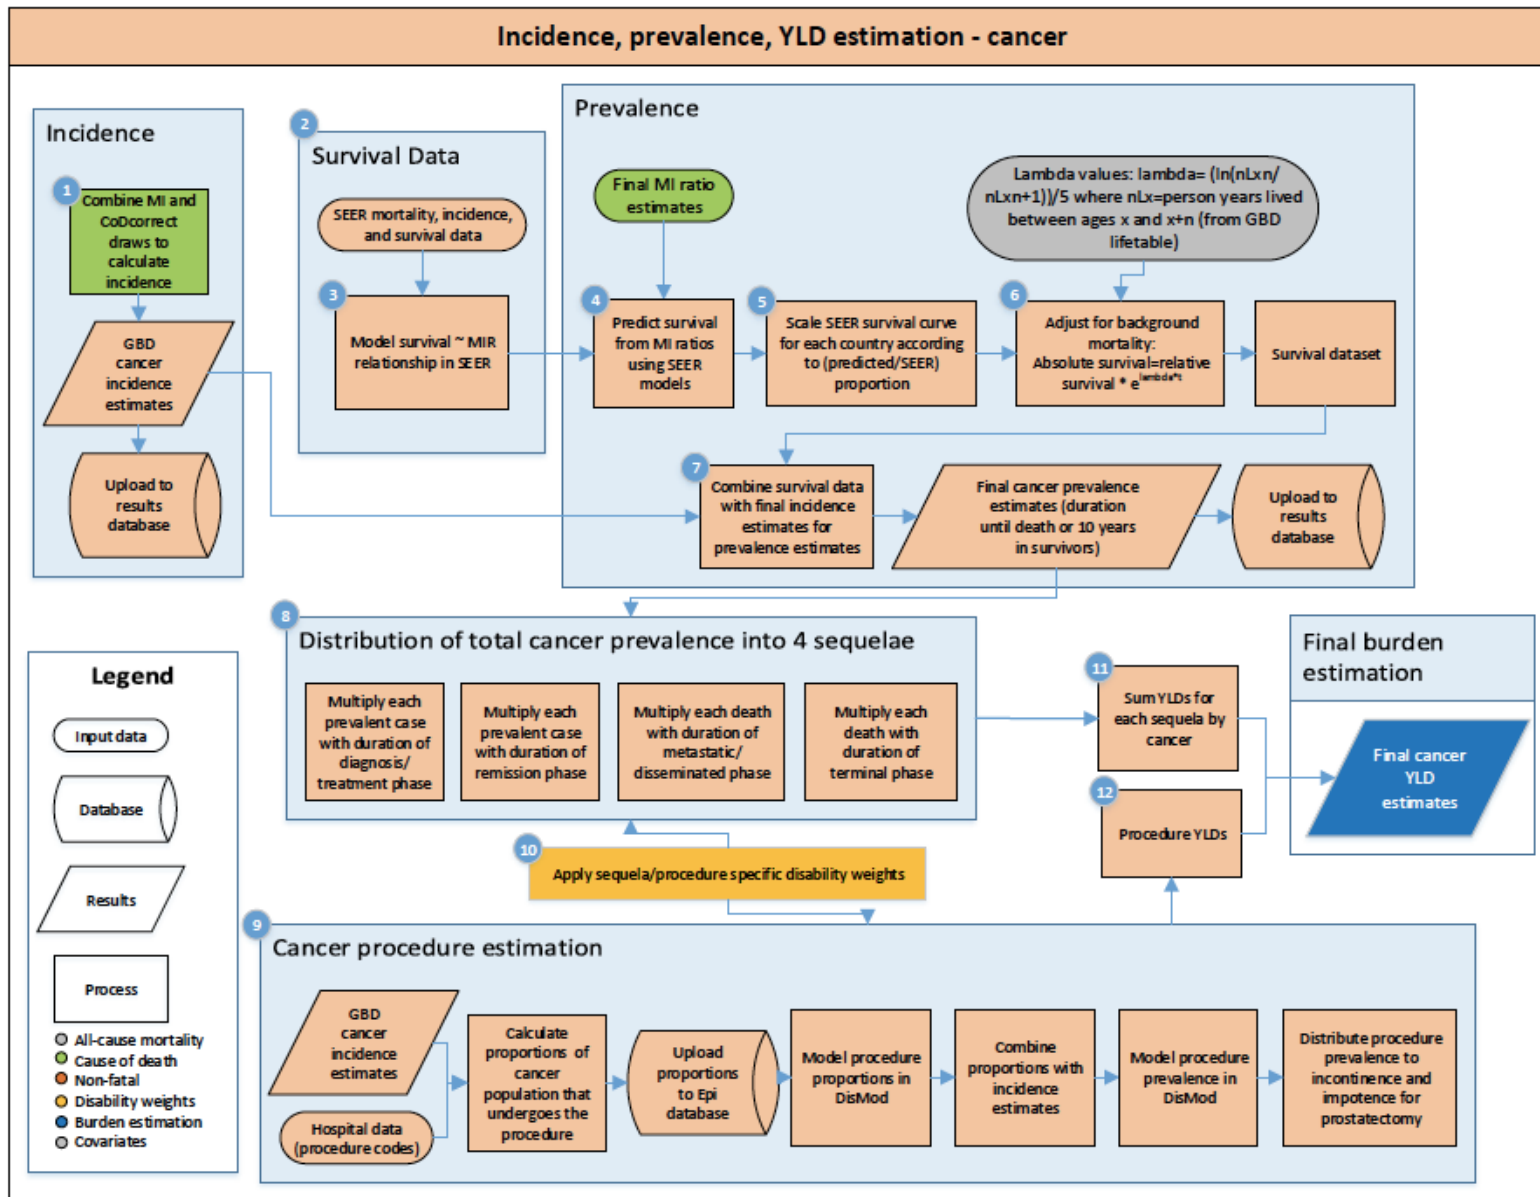

eFigure 2: Flowchart GBD cancer incidence, prevalence, YLD estimation

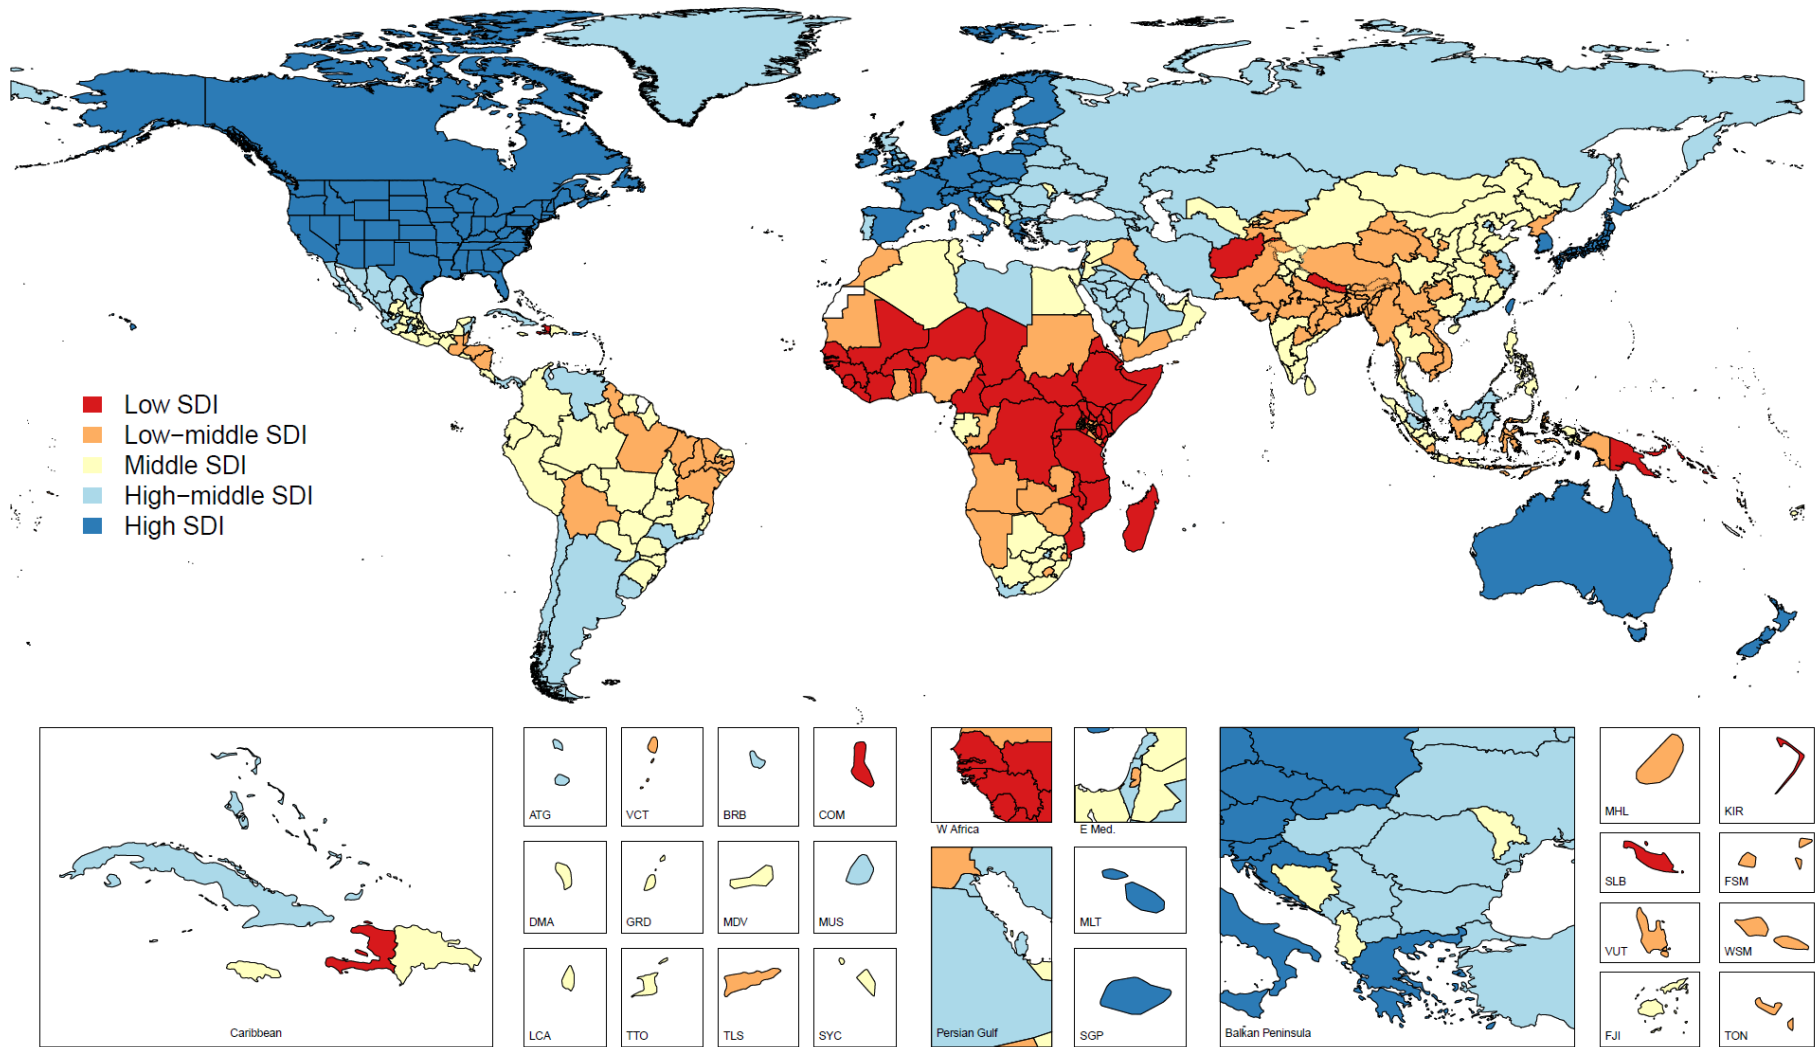

eFigure 3: Socio-demographic Index quintiles

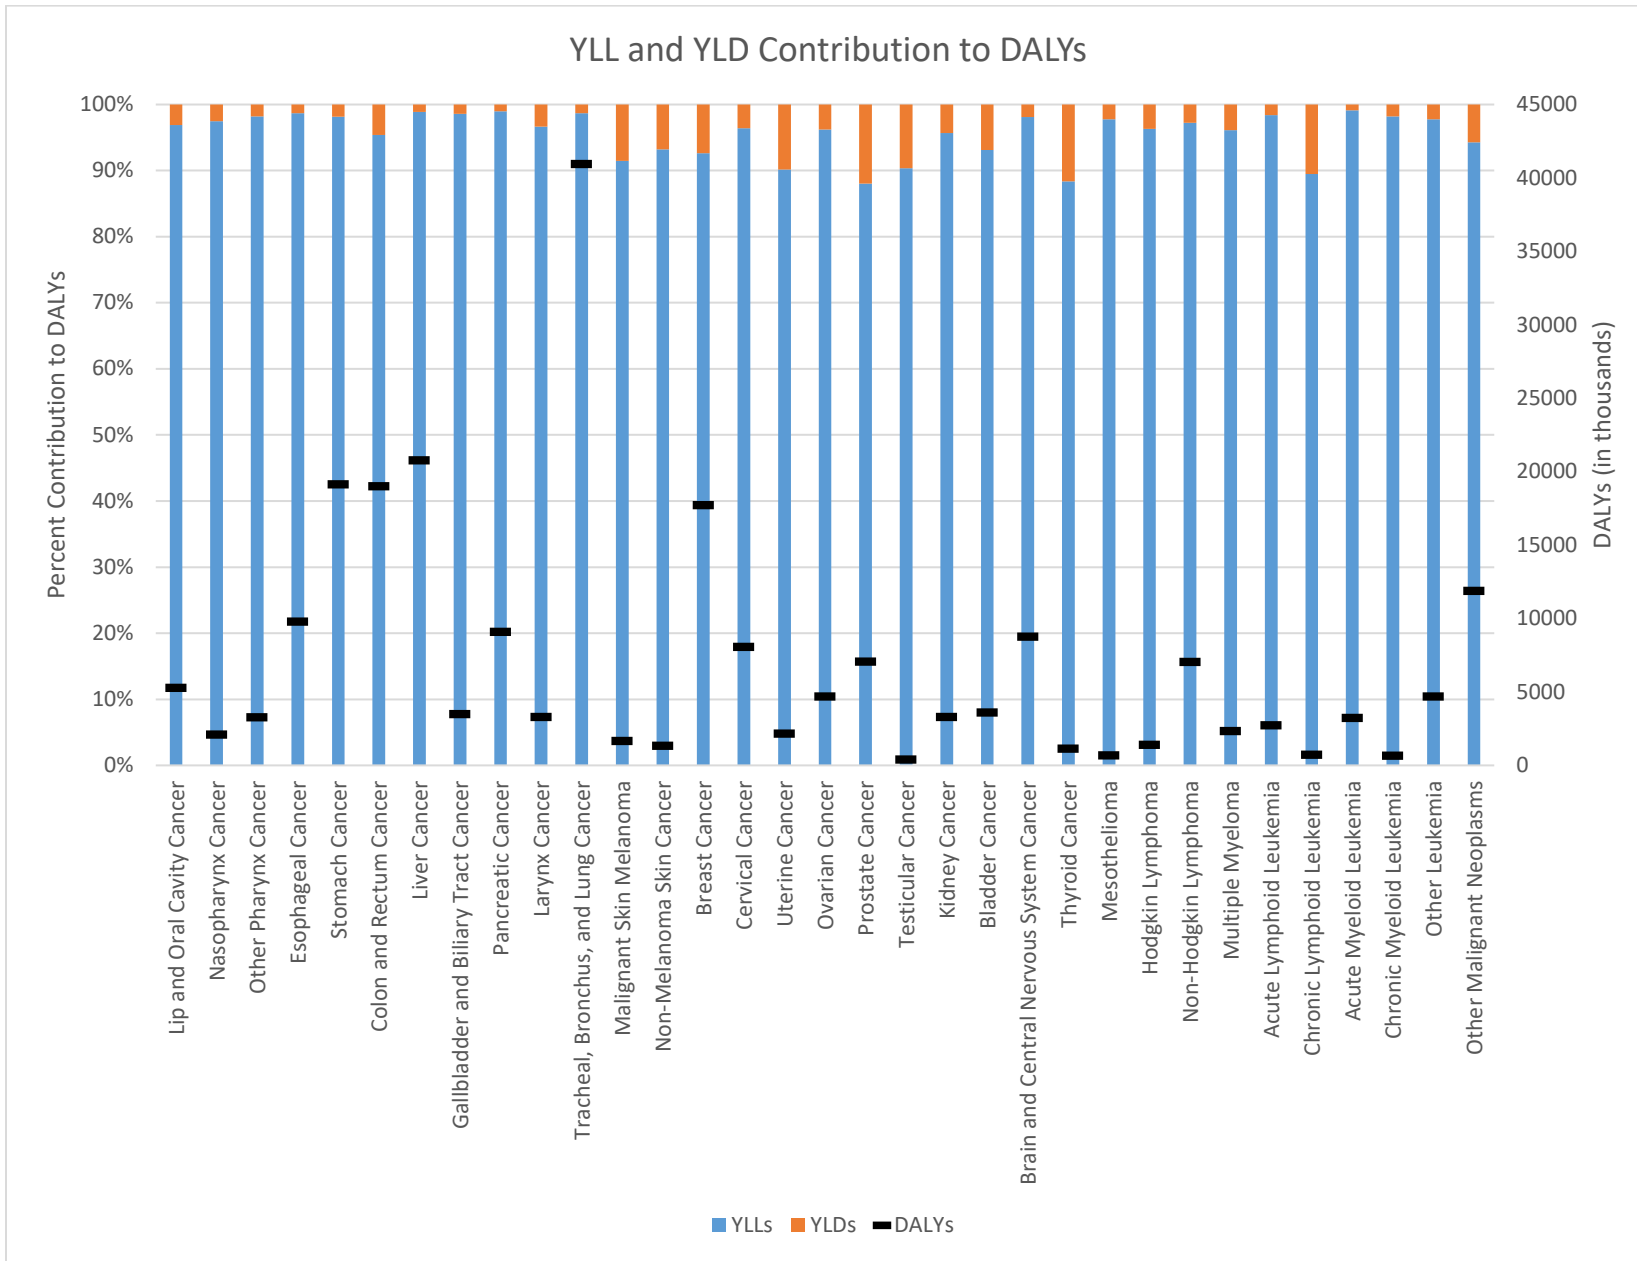

eFigure 4: Contribution of YLDs and YLLs to DALYs by cancer, global, both sexes, 2017

| Country                | Non-melanoma skin cancer | Tracheal, bronchus, and lung cancer | Breast cancer | Colon and rectum cancer | Prostate cancer | Stomach cancer | Liver cancer | Other malignant neoplasms | Cervical cancer | Non-Hodgkin lymphoma | Bladder cancer | Esophageal cancer | Pancreatic cancer | Uterine cancer | Brain and central nervous system cancer | Kidney cancer | Lip and oral cavity cancer | Malignant skin melanoma | Ovarian cancer | Thyroid cancer | Other leukemia | Gallbladder and biliary tract cancer | Larynx cancer | Other pharynx cancer | Multiple myeloma | Acute myeloid leukemia | Chronic lymphoid leukemia | Nasopharynx cancer | Acute lymphoid leukemia | Hodgkin lymphoma | Testicular cancer | Chronic myeloid leukemia | Mesothelioma |
|------------------------|--------------------------|-------------------------------------|---------------|-------------------------|-----------------|----------------|--------------|---------------------------|-----------------|----------------------|----------------|-------------------|-------------------|----------------|-----------------------------------------|---------------|----------------------------|-------------------------|----------------|----------------|----------------|--------------------------------------|---------------|----------------------|------------------|------------------------|---------------------------|--------------------|-------------------------|------------------|-------------------|--------------------------|--------------|
| <b>Global</b>          | 1                        | 2                                   | 3             | 4                       | 5               | 6              | 7            | 8                         | 9               | 10                   | 11             | 12                | 13                | 14             | 15                                      | 16            | 17                         | 18                      | 19             | 20             | 21             | 22                                   | 23            | 24                   | 25               | 26                     | 27                        | 28                 | 29                      | 30               | 31                | 32                       | 33           |
| <b>High SDI</b>        | 1                        | 3                                   | 4             | 2                       | 5               | 6              | 13           | 11                        | 22              | 7                    | 9              | 18                | 10                | 12             | 15                                      | 14            | 16                         | 8                       | 19             | 20             | 27             | 17                                   | 24            | 26                   | 21               | 25                     | 23                        | 33                 | 31                      | 28               | 29                | 32                       | 30           |
| <b>High-middle SDI</b> | 2                        | 1                                   | 4             | 3                       | 7               | 5              | 6            | 8                         | 13              | 14                   | 11             | 9                 | 12                | 15             | 10                                      | 16            | 20                         | 22                      | 18             | 19             | 17             | 23                                   | 21            | 29                   | 26               | 30                     | 27                        | 25                 | 24                      | 28               | 31                | 32                       | 33           |
| <b>Middle SDI</b>      | 1                        | 2                                   | 3             | 5                       | 7               | 4              | 6            | 9                         | 8               | 13                   | 17             | 10                | 15                | 16             | 11                                      | 18            | 12                         | 29                      | 19             | 20             | 14             | 23                                   | 21            | 25                   | 27               | 26                     | 28                        | 22                 | 24                      | 30               | 31                | 32                       | 33           |
| <b>Low-middle SDI</b>  | 2                        | 4                                   | 1             | 5                       | 8               | 6              | 9            | 10                        | 3               | 13                   | 14             | 11                | 17                | 22             | 15                                      | 18            | 7                          | 29                      | 12             | 20             | 21             | 23                                   | 19            | 16                   | 28               | 24                     | 32                        | 25                 | 27                      | 26               | 31                | 30                       | 33           |
| <b>Low SDI</b>         | 3                        | 4                                   | 2             | 6                       | 10              | 5              | 8            | 7                         | 1               | 12                   | 18             | 11                | 19                | 24             | 14                                      | 16            | 9                          | 30                      | 17             | 20             | 21             | 22                                   | 15            | 13                   | 28               | 23                     | 32                        | 25                 | 26                      | 27               | 33                | 29                       | 31           |
| <b>South Asia</b>      | 8                        | 3                                   | 1             | 5                       | 12              | 6              | 14           | 9                         | 4               | 15                   | 20             | 10                | 19                | 22             | 16                                      | 21            | 2                          | 31                      | 13             | 17             | 24             | 18                                   | 11            | 7                    | 26               | 23                     | 33                        | 25                 | 27                      | 28               | 30                | 29                       | 32           |
| India                  | 8                        | 6                                   | 1             | 4                       | 10              | 5              | 13           | 9                         | 3               | 16                   | 21             | 11                | 18                | 22             | 15                                      | 20            | 2                          | 31                      | 14             | 19             | 25             | 17                                   | 12            | 7                    | 26               | 23                     | 33                        | 24                 | 27                      | 29               | 30                | 28                       | 32           |
| Pakistan               | 25                       | 3                                   | 1             | 7                       | 19              | 17             | 13           | 5                         | 10              | 6                    | 11             | 9                 | 26                | 15             | 12                                      | 24            | 2                          | 30                      | 4              | 8              | 23             | 18                                   | 14            | 16                   | 28               | 20                     | 33                        | 27                 | 22                      | 21               | 29                | 31                       | 32           |
| Bangladesh             | 15                       | 1                                   | 2             | 3                       | 10              | 6              | 13           | 7                         | 4               | 16                   | 21             | 12                | 19                | 26             | 8                                       | 20            | 5                          | 30                      | 18             | 14             | 23             | 17                                   | 11            | 9                    | 27               | 22                     | 31                        | 25                 | 24                      | 28               | 33                | 29                       | 32           |
| Nepal                  | 19                       | 2                                   | 1             | 6                       | 10              | 4              | 12           | 8                         | 3               | 17                   | 21             | 7                 | 14                | 23             | 15                                      | 20            | 5                          | 30                      | 16             | 18             | 24             | 13                                   | 11            | 9                    | 26               | 22                     | 33                        | 25                 | 27                      | 28               | 32                | 29                       | 31           |
| Bhutan                 | 19                       | 5                                   | 1             | 3                       | 8               | 6              | 11           | 7                         | 4               | 14                   | 21             | 10                | 16                | 24             | 12                                      | 20            | 2                          | 31                      | 18             | 15             | 23             | 17                                   | 13            | 9                    | 27               | 22                     | 33                        | 25                 | 26                      | 28               | 30                | 29                       | 32           |
| <b>East Asia</b>       | 6                        | 1                                   | 5             | 4                       | 9               | 2              | 3            | 8                         | 12              | 14                   | 15             | 7                 | 13                | 16             | 10                                      | 18            | 17                         | 29                      | 21             | 20             | 11             | 24                                   | 23            | 30                   | 26               | 28                     | 25                        | 19                 | 22                      | 27               | 31                | 32                       | 33           |
| China                  | 6                        | 1                                   | 5             | 4                       | 9               | 2              | 3            | 8                         | 12              | 14                   | 15             | 7                 | 13                | 16             | 10                                      | 17            | 18                         | 29                      | 22             | 20             | 11             | 24                                   | 23            | 30                   | 26               | 28                     | 25                        | 19                 | 21                      | 27               | 31                | 32                       | 33           |
| North Korea            | 19                       | 2                                   | 4             | 5                       | 8               | 3              | 1            | 9                         | 6               | 18                   | 12             | 7                 | 15                | 11             | 14                                      | 13            | 20                         | 29                      | 16             | 21             | 10             | 22                                   | 23            | 27                   | 26               | 24                     | 30                        | 17                 | 25                      | 28               | 33                | 31                       | 32           |
| Taiwan                 | 9                        | 3                                   | 4             | 1                       | 5               | 7              | 2            | 8                         | 17              | 11                   | 12             | 10                | 14                | 13             | 19                                      | 15            | 6                          | 29                      | 20             | 18             | 26             | 22                                   | 23            | 16                   | 25               | 24                     | 31                        | 21                 | 30                      | 28               | 27                | 32                       | 33           |
| <b>Southeast Asia</b>  | 5                        | 2                                   | 1             | 3                       | 7               | 8              | 4            | 9                         | 6               | 14                   | 13             | 21                | 19                | 18             | 15                                      | 16            | 10                         | 30                      | 11             | 12             | 17             | 22                                   | 23            | 26                   | 27               | 24                     | 33                        | 20                 | 25                      | 28               | 31                | 29                       | 32           |
| Indonesia              | 1                        | 3                                   | 2             | 5                       | 8               | 7              | 6            | 9                         | 4               | 15                   | 11             | 26                | 16                | 17             | 13                                      | 14            | 19                         | 30                      | 10             | 20             | 12             | 22                                   | 21            | 25                   | 27               | 23                     | 32                        | 18                 | 24                      | 28               | 33                | 29                       | 31           |
| Philippines            | 12                       | 3                                   | 1             | 2                       | 6               | 15             | 4            | 8                         | 5               | 17                   | 22             | 24                | 19                | 11             | 16                                      | 10            | 14                         | 29                      | 7              | 9              | 13             | 27                                   | 23            | 26                   | 25               | 20                     | 33                        | 18                 | 21                      | 31               | 30                | 28                       | 32           |
| Vietnam                | 10                       | 1                                   | 3             | 2                       | 11              | 6              | 4            | 9                         | 5               | 12                   | 20             | 15                | 18                | 21             | 13                                      | 22            | 7                          | 30                      | 14             | 8              | 25             | 26                                   | 19            | 16                   | 28               | 23                     | 33                        | 17                 | 24                      | 27               | 29                | 31                       | 32           |
| Thailand               | 10                       | 2                                   | 3             | 4                       | 6               | 11             | 1            | 8                         | 5               | 20                   | 12             | 17                | 14                | 19             | 15                                      | 21            | 7                          | 29                      | 13             | 18             | 16             | 9                                    | 22            | 26                   | 27               | 24                     | 32                        | 23                 | 25                      | 30               | 31                | 28                       | 33           |
| Myanmar                | 10                       | 2                                   | 1             | 4                       | 8               | 6              | 5            | 11                        | 3               | 16                   | 14             | 7                 | 17                | 15             | 18                                      | 13            | 19                         | 31                      | 9              | 21             | 12             | 23                                   | 22            | 26                   | 27               | 24                     | 32                        | 20                 | 25                      | 28               | 33                | 30                       | 29           |

|                                     |    |    |   |   |    |    |    |    |    |    |    |    |    |    |    |    |    |    |    |    |    |    |    |    |    |    |    |    |    |    |    |    |    |
|-------------------------------------|----|----|---|---|----|----|----|----|----|----|----|----|----|----|----|----|----|----|----|----|----|----|----|----|----|----|----|----|----|----|----|----|----|
| Malaysia                            | 9  | 3  | 1 | 2 | 5  | 7  | 8  | 6  | 4  | 12 | 14 | 22 | 19 | 15 | 18 | 17 | 13 | 31 | 16 | 11 | 27 | 26 | 23 | 25 | 28 | 21 | 32 | 10 | 20 | 29 | 24 | 30 | 33 |
| Sri Lanka                           | 8  | 6  | 1 | 2 | 5  | 9  | 17 | 4  | 10 | 13 | 16 | 11 | 20 | 14 | 21 | 7  | 3  | 30 | 15 | 12 | 18 | 22 | 25 | 19 | 27 | 24 | 33 | 26 | 23 | 28 | 32 | 31 | 29 |
| Cambodia                            | 7  | 1  | 2 | 4 | 8  | 5  | 6  | 9  | 3  | 14 | 13 | 20 | 19 | 16 | 17 | 15 | 12 | 30 | 11 | 21 | 10 | 23 | 22 | 26 | 27 | 25 | 32 | 18 | 24 | 28 | 33 | 29 | 31 |
| Laos                                | 7  | 1  | 2 | 4 | 9  | 6  | 5  | 10 | 3  | 14 | 15 | 20 | 17 | 19 | 13 | 12 | 16 | 30 | 11 | 21 | 8  | 25 | 23 | 26 | 28 | 24 | 32 | 18 | 22 | 27 | 33 | 29 | 31 |
| Timor-Leste                         | 8  | 1  | 2 | 4 | 5  | 7  | 6  | 9  | 3  | 12 | 11 | 22 | 17 | 18 | 14 | 15 | 16 | 30 | 13 | 21 | 10 | 25 | 24 | 26 | 28 | 23 | 32 | 19 | 20 | 27 | 33 | 29 | 31 |
| Mauritius                           | 9  | 4  | 1 | 2 | 3  | 5  | 14 | 8  | 6  | 16 | 12 | 19 | 13 | 7  | 20 | 15 | 10 | 29 | 11 | 18 | 17 | 23 | 21 | 25 | 22 | 26 | 32 | 24 | 28 | 27 | 30 | 31 | 33 |
| Maldives                            | 3  | 6  | 1 | 2 | 5  | 18 | 11 | 7  | 8  | 13 | 9  | 20 | 17 | 19 | 14 | 15 | 4  | 25 | 12 | 10 | 16 | 26 | 21 | 30 | 23 | 24 | 31 | 28 | 22 | 32 | 33 | 27 | 29 |
| Seychelles                          | 11 | 5  | 3 | 2 | 1  | 15 | 12 | 20 | 4  | 10 | 7  | 19 | 14 | 17 | 18 | 16 | 6  | 31 | 8  | 25 | 22 | 28 | 9  | 13 | 23 | 26 | 29 | 21 | 24 | 32 | 27 | 30 | 33 |
| <b>North Africa and Middle East</b> | 2  | 3  | 1 | 5 | 4  | 6  | 10 | 8  | 16 | 11 | 7  | 20 | 14 | 18 | 9  | 15 | 23 | 26 | 17 | 13 | 12 | 27 | 19 | 32 | 24 | 22 | 30 | 29 | 25 | 21 | 28 | 31 | 33 |
| Egypt                               | 10 | 5  | 2 | 4 | 6  | 14 | 1  | 7  | 19 | 13 | 3  | 20 | 17 | 18 | 9  | 12 | 22 | 28 | 11 | 15 | 8  | 24 | 21 | 27 | 23 | 25 | 32 | 29 | 26 | 16 | 33 | 30 | 31 |
| Iran                                | 1  | 6  | 2 | 5 | 3  | 4  | 15 | 8  | 19 | 11 | 9  | 13 | 14 | 20 | 7  | 16 | 24 | 25 | 17 | 12 | 10 | 28 | 18 | 32 | 26 | 21 | 29 | 33 | 23 | 22 | 27 | 31 | 30 |
| Turkey                              | 1  | 2  | 4 | 5 | 3  | 6  | 14 | 13 | 22 | 10 | 7  | 27 | 9  | 11 | 8  | 12 | 26 | 16 | 17 | 15 | 23 | 28 | 18 | 33 | 21 | 20 | 24 | 31 | 25 | 29 | 19 | 32 | 30 |
| Iraq                                | 7  | 2  | 1 | 4 | 10 | 12 | 11 | 8  | 19 | 17 | 6  | 24 | 13 | 16 | 3  | 9  | 22 | 32 | 14 | 15 | 5  | 25 | 21 | 27 | 23 | 18 | 31 | 29 | 20 | 26 | 30 | 28 | 33 |
| Algeria                             | 5  | 4  | 1 | 3 | 2  | 10 | 19 | 8  | 6  | 9  | 11 | 27 | 14 | 25 | 13 | 17 | 24 | 29 | 18 | 7  | 21 | 12 | 22 | 26 | 23 | 20 | 32 | 15 | 30 | 16 | 31 | 28 | 33 |
| Sudan                               | 1  | 6  | 3 | 4 | 5  | 2  | 14 | 9  | 13 | 15 | 10 | 11 | 19 | 26 | 8  | 12 | 22 | 28 | 21 | 20 | 7  | 24 | 18 | 31 | 25 | 16 | 30 | 27 | 17 | 23 | 32 | 29 | 33 |
| Morocco                             | 3  | 2  | 1 | 4 | 5  | 10 | 21 | 8  | 6  | 7  | 12 | 23 | 15 | 18 | 14 | 20 | 19 | 27 | 11 | 9  | 22 | 24 | 13 | 28 | 25 | 26 | 33 | 16 | 29 | 17 | 30 | 31 | 32 |
| Saudi Arabia                        | 14 | 8  | 1 | 3 | 2  | 13 | 10 | 6  | 20 | 5  | 11 | 24 | 16 | 18 | 7  | 15 | 17 | 30 | 19 | 4  | 9  | 27 | 25 | 31 | 23 | 26 | 32 | 21 | 28 | 12 | 22 | 29 | 33 |
| Afghanistan                         | 3  | 7  | 2 | 5 | 15 | 1  | 12 | 9  | 4  | 14 | 16 | 10 | 22 | 26 | 8  | 11 | 24 | 30 | 20 | 21 | 6  | 23 | 17 | 31 | 29 | 13 | 32 | 25 | 18 | 19 | 33 | 27 | 28 |
| Yemen                               | 2  | 4  | 3 | 5 | 6  | 1  | 15 | 8  | 10 | 14 | 11 | 12 | 20 | 25 | 9  | 13 | 22 | 29 | 21 | 19 | 7  | 24 | 17 | 31 | 27 | 16 | 30 | 26 | 18 | 23 | 32 | 28 | 33 |
| Syria                               | 3  | 6  | 1 | 5 | 2  | 9  | 10 | 12 | 18 | 14 | 8  | 25 | 13 | 19 | 7  | 15 | 22 | 28 | 17 | 21 | 4  | 27 | 23 | 29 | 26 | 11 | 20 | 30 | 16 | 31 | 33 | 24 | 32 |
| Tunisia                             | 3  | 2  | 1 | 4 | 5  | 9  | 23 | 8  | 14 | 7  | 6  | 26 | 15 | 19 | 13 | 18 | 17 | 25 | 16 | 10 | 12 | 20 | 11 | 28 | 24 | 27 | 31 | 22 | 30 | 21 | 29 | 32 | 33 |
| Jordan                              | 6  | 4  | 1 | 2 | 3  | 11 | 17 | 9  | 19 | 7  | 8  | 24 | 13 | 14 | 10 | 15 | 18 | 28 | 16 | 12 | 5  | 22 | 23 | 29 | 21 | 27 | 32 | 25 | 26 | 30 | 20 | 33 | 31 |
| <b>United Arab Emirates</b>         | 3  | 8  | 2 | 4 | 5  | 13 | 15 | 1  | 17 | 9  | 7  | 11 | 14 | 27 | 6  | 10 | 18 | 25 | 20 | 12 | 19 | 29 | 16 | 30 | 23 | 21 | 32 | 26 | 28 | 22 | 24 | 31 | 33 |
| Lebanon                             | 8  | 7  | 1 | 3 | 2  | 14 | 23 | 4  | 19 | 5  | 6  | 28 | 18 | 13 | 10 | 22 | 24 | 20 | 15 | 11 | 12 | 25 | 17 | 31 | 21 | 26 | 29 | 30 | 27 | 9  | 16 | 32 | 33 |
| Libya                               | 8  | 3  | 1 | 2 | 4  | 14 | 16 | 7  | 12 | 6  | 5  | 26 | 15 | 20 | 9  | 17 | 22 | 29 | 18 | 10 | 11 | 23 | 19 | 32 | 24 | 25 | 30 | 21 | 28 | 13 | 27 | 31 | 33 |
| Palestine                           | 3  | 4  | 1 | 2 | 5  | 10 | 9  | 14 | 17 | 16 | 11 | 23 | 13 | 12 | 6  | 8  | 21 | 29 | 15 | 18 | 7  | 26 | 24 | 31 | 19 | 20 | 28 | 27 | 25 | 22 | 33 | 30 | 32 |
| Oman                                | 6  | 11 | 1 | 3 | 2  | 8  | 12 | 5  | 15 | 4  | 13 | 21 | 18 | 23 | 10 | 16 | 17 | 26 | 19 | 7  | 9  | 28 | 24 | 30 | 20 | 22 | 32 | 29 | 25 | 14 | 27 | 33 | 31 |
| Kuwait                              | 8  | 6  | 1 | 3 | 2  | 17 | 12 | 5  | 18 | 4  | 7  | 24 | 15 | 11 | 9  | 14 | 19 | 26 | 16 | 10 | 13 | 28 | 25 | 30 | 21 | 20 | 27 | 29 | 23 | 22 | 33 | 31 | 32 |
| Qatar                               | 3  | 6  | 1 | 4 | 2  | 11 | 9  | 5  | 19 | 8  | 10 | 25 | 16 | 18 | 7  | 13 | 22 | 26 | 17 | 12 | 15 | 28 | 23 | 31 | 24 | 14 | 27 | 32 | 20 | 21 | 30 | 29 | 33 |
| Bahrain                             | 5  | 4  | 1 | 3 | 2  | 11 | 16 | 9  | 17 | 7  | 6  | 22 | 12 | 10 | 14 | 8  | 20 | 29 | 13 | 15 | 18 | 26 | 25 | 30 | 21 | 19 | 27 | 28 | 24 | 23 | 33 | 31 | 32 |
| <b>Western SSA</b>                  | 4  | 8  | 1 | 7 | 3  | 9  | 5  | 6  | 2  | 10 | 15 | 13 | 12 | 21 | 14 | 11 | 20 | 27 | 16 | 28 | 19 | 24 | 23 | 30 | 22 | 17 | 31 | 25 | 26 | 18 | 33 | 29 | 32 |
| Nigeria                             | 5  | 7  | 1 | 6 | 2  | 14 | 13 | 4  | 3  | 8  | 19 | 16 | 12 | 23 | 11 | 9  | 21 | 26 | 15 | 28 | 18 | 24 | 22 | 31 | 20 | 17 | 30 | 25 | 27 | 10 | 33 | 29 | 32 |



|                       |   |    |   |   |   |    |    |    |    |    |    |    |    |    |    |    |    |    |    |    |    |    |    |    |    |    |    |    |    |    |    |    |    |
|-----------------------|---|----|---|---|---|----|----|----|----|----|----|----|----|----|----|----|----|----|----|----|----|----|----|----|----|----|----|----|----|----|----|----|----|
| Ghana                 | 4 | 10 | 2 | 6 | 5 | 8  | 3  | 12 | 1  | 9  | 15 | 16 | 7  | 14 | 11 | 13 | 18 | 29 | 17 | 27 | 20 | 23 | 21 | 24 | 22 | 19 | 28 | 30 | 25 | 32 | 33 | 26 | 31 |
| Cameroon              | 4 | 7  | 3 | 8 | 5 | 6  | 2  | 9  | 1  | 12 | 14 | 11 | 13 | 19 | 15 | 10 | 18 | 30 | 16 | 25 | 20 | 23 | 21 | 27 | 22 | 17 | 31 | 28 | 24 | 29 | 33 | 26 | 32 |
| Cote d'Ivoire         | 3 | 8  | 2 | 9 | 1 | 10 | 5  | 7  | 4  | 6  | 11 | 22 | 15 | 20 | 17 | 13 | 14 | 30 | 12 | 25 | 23 | 24 | 19 | 27 | 18 | 16 | 32 | 21 | 28 | 26 | 33 | 29 | 31 |
| Niger                 | 3 | 8  | 6 | 9 | 5 | 4  | 2  | 7  | 1  | 11 | 17 | 12 | 16 | 20 | 15 | 10 | 18 | 29 | 19 | 28 | 13 | 22 | 21 | 30 | 23 | 14 | 31 | 27 | 24 | 25 | 33 | 26 | 32 |
| Burkina Faso          | 4 | 9  | 2 | 5 | 7 | 6  | 3  | 8  | 1  | 13 | 15 | 11 | 14 | 19 | 10 | 12 | 20 | 30 | 18 | 25 | 17 | 23 | 21 | 29 | 22 | 16 | 31 | 28 | 24 | 26 | 33 | 27 | 32 |
| Mali                  | 3 | 10 | 6 | 8 | 9 | 5  | 1  | 4  | 2  | 11 | 7  | 16 | 13 | 22 | 19 | 12 | 17 | 24 | 20 | 18 | 15 | 27 | 26 | 31 | 23 | 14 | 32 | 28 | 25 | 21 | 30 | 29 | 33 |
| Chad                  | 2 | 7  | 6 | 9 | 4 | 5  | 3  | 8  | 1  | 11 | 13 | 12 | 17 | 20 | 15 | 10 | 18 | 30 | 19 | 28 | 14 | 22 | 21 | 29 | 24 | 16 | 31 | 26 | 23 | 25 | 33 | 27 | 32 |
| Senegal               | 2 | 7  | 4 | 8 | 3 | 6  | 5  | 9  | 1  | 12 | 14 | 10 | 13 | 19 | 17 | 11 | 18 | 30 | 16 | 26 | 20 | 23 | 21 | 29 | 22 | 15 | 31 | 28 | 24 | 27 | 33 | 25 | 32 |
| Guinea                | 5 | 8  | 3 | 9 | 7 | 4  | 1  | 6  | 2  | 12 | 11 | 17 | 15 | 16 | 19 | 13 | 10 | 24 | 14 | 27 | 21 | 23 | 20 | 22 | 28 | 18 | 33 | 26 | 29 | 25 | 31 | 30 | 32 |
| Benin                 | 2 | 8  | 4 | 9 | 5 | 6  | 3  | 7  | 1  | 12 | 14 | 10 | 13 | 20 | 16 | 11 | 19 | 30 | 17 | 25 | 18 | 23 | 22 | 29 | 21 | 15 | 31 | 28 | 24 | 27 | 33 | 26 | 32 |
| Sierra Leone          | 3 | 7  | 2 | 8 | 5 | 6  | 4  | 9  | 1  | 12 | 14 | 11 | 13 | 20 | 15 | 10 | 19 | 30 | 17 | 25 | 18 | 23 | 21 | 29 | 22 | 16 | 31 | 27 | 24 | 28 | 33 | 26 | 32 |
| Togo                  | 3 | 7  | 2 | 8 | 6 | 5  | 4  | 9  | 1  | 12 | 14 | 10 | 13 | 18 | 16 | 11 | 17 | 30 | 15 | 25 | 20 | 23 | 21 | 29 | 22 | 19 | 31 | 27 | 26 | 28 | 33 | 24 | 32 |
| Liberia               | 2 | 9  | 4 | 7 | 5 | 6  | 3  | 8  | 1  | 12 | 14 | 10 | 13 | 19 | 17 | 11 | 18 | 30 | 16 | 25 | 20 | 23 | 22 | 29 | 21 | 15 | 31 | 27 | 24 | 28 | 33 | 26 | 32 |
| Mauritania            | 4 | 8  | 3 | 6 | 2 | 7  | 5  | 9  | 1  | 13 | 14 | 11 | 12 | 16 | 18 | 10 | 19 | 26 | 15 | 24 | 20 | 22 | 23 | 29 | 21 | 17 | 31 | 28 | 25 | 30 | 33 | 27 | 32 |
| The Gambia            | 3 | 6  | 4 | 8 | 9 | 10 | 1  | 5  | 2  | 7  | 13 | 17 | 12 | 18 | 20 | 11 | 14 | 30 | 15 | 22 | 19 | 21 | 26 | 29 | 25 | 16 | 31 | 23 | 27 | 24 | 32 | 28 | 33 |
| Guinea-Bissau         | 4 | 8  | 3 | 6 | 7 | 5  | 2  | 9  | 1  | 12 | 14 | 10 | 13 | 20 | 15 | 11 | 19 | 30 | 17 | 28 | 18 | 23 | 21 | 29 | 22 | 16 | 32 | 26 | 24 | 25 | 33 | 27 | 31 |
| Cape Verde            | 4 | 6  | 3 | 9 | 1 | 2  | 7  | 13 | 5  | 16 | 14 | 8  | 10 | 17 | 15 | 11 | 12 | 29 | 18 | 24 | 20 | 25 | 23 | 22 | 21 | 19 | 30 | 28 | 27 | 32 | 31 | 26 | 33 |
| Sao Tome and Principe | 4 | 6  | 3 | 7 | 8 | 5  | 16 | 2  | 1  | 11 | 9  | 13 | 17 | 14 | 20 | 10 | 22 | 29 | 12 | 23 | 19 | 18 | 24 | 26 | 21 | 15 | 28 | 30 | 25 | 32 | 33 | 27 | 31 |
| <b>Western Europe</b> | 1 | 5  | 3 | 2 | 4 | 10 | 15 | 9  | 23 | 8  | 6  | 20 | 11 | 12 | 14 | 13 | 18 | 7  | 16 | 21 | 27 | 22 | 25 | 26 | 19 | 24 | 17 | 33 | 32 | 28 | 29 | 31 | 30 |
| Germany               | 1 | 5  | 2 | 3 | 4 | 7  | 14 | 10 | 24 | 8  | 11 | 20 | 9  | 13 | 16 | 12 | 19 | 6  | 17 | 22 | 29 | 18 | 27 | 23 | 21 | 25 | 15 | 33 | 32 | 28 | 26 | 30 | 31 |
| United Kingdom        | 1 | 4  | 2 | 3 | 5 | 9  | 19 | 8  | 22 | 7  | 10 | 15 | 11 | 12 | 14 | 13 | 20 | 6  | 16 | 24 | 30 | 28 | 27 | 25 | 18 | 21 | 17 | 33 | 31 | 26 | 29 | 32 | 23 |
| France                | 1 | 4  | 2 | 3 | 5 | 12 | 14 | 7  | 24 | 9  | 6  | 22 | 10 | 11 | 13 | 15 | 16 | 8  | 18 | 25 | 23 | 27 | 21 | 19 | 20 | 26 | 17 | 33 | 32 | 29 | 28 | 31 | 30 |
| Italy                 | 1 | 4  | 3 | 2 | 5 | 7  | 13 | 9  | 25 | 8  | 6  | 27 | 12 | 10 | 15 | 14 | 21 | 11 | 20 | 16 | 24 | 19 | 22 | 29 | 18 | 23 | 17 | 33 | 31 | 26 | 28 | 32 | 30 |
| England               | 1 | 5  | 2 | 3 | 4 | 9  | 19 | 8  | 22 | 7  | 10 | 15 | 11 | 12 | 14 | 13 | 20 | 6  | 16 | 24 | 30 | 28 | 27 | 25 | 18 | 21 | 17 | 33 | 31 | 26 | 29 | 32 | 23 |
| Spain                 | 1 | 3  | 4 | 2 | 5 | 7  | 15 | 11 | 22 | 9  | 6  | 24 | 13 | 10 | 14 | 8  | 16 | 12 | 18 | 23 | 25 | 20 | 17 | 26 | 19 | 27 | 21 | 31 | 29 | 28 | 30 | 32 | 33 |
| Netherlands           | 1 | 5  | 3 | 2 | 4 | 11 | 20 | 8  | 24 | 9  | 7  | 15 | 12 | 10 | 13 | 14 | 19 | 6  | 17 | 21 | 16 | 23 | 25 | 29 | 18 | 22 | 30 | 33 | 31 | 26 | 27 | 32 | 28 |
| Belgium               | 1 | 4  | 2 | 3 | 5 | 12 | 16 | 7  | 25 | 9  | 6  | 18 | 10 | 11 | 13 | 14 | 15 | 8  | 17 | 22 | 21 | 27 | 24 | 26 | 19 | 23 | 20 | 33 | 32 | 28 | 30 | 31 | 29 |
| Portugal              | 1 | 5  | 4 | 2 | 3 | 6  | 16 | 10 | 17 | 8  | 7  | 22 | 11 | 9  | 12 | 14 | 15 | 13 | 20 | 18 | 27 | 25 | 23 | 19 | 24 | 26 | 21 | 29 | 31 | 28 | 30 | 32 | 33 |
| Greece                | 1 | 3  | 2 | 4 | 5 | 8  | 13 | 11 | 21 | 15 | 6  | 28 | 10 | 9  | 7  | 14 | 24 | 12 | 16 | 26 | 19 | 25 | 18 | 32 | 23 | 22 | 17 | 30 | 31 | 20 | 27 | 29 | 33 |
| Sweden                | 1 | 5  | 3 | 4 | 2 | 14 | 18 | 8  | 20 | 9  | 7  | 21 | 12 | 10 | 11 | 13 | 19 | 6  | 17 | 23 | 27 | 22 | 29 | 26 | 16 | 24 | 15 | 33 | 31 | 28 | 25 | 32 | 30 |
| Israel                | 1 | 4  | 2 | 3 | 5 | 13 | 20 | 11 | 21 | 6  | 7  | 28 | 9  | 12 | 10 | 14 | 22 | 8  | 16 | 17 | 25 | 26 | 24 | 33 | 19 | 18 | 15 | 31 | 27 | 23 | 29 | 30 | 32 |
| Austria               | 5 | 4  | 2 | 3 | 1 | 9  | 13 | 12 | 23 | 10 | 6  | 24 | 8  | 11 | 15 | 14 | 21 | 7  | 16 | 18 | 29 | 19 | 27 | 20 | 22 | 25 | 17 | 33 | 32 | 28 | 26 | 30 | 31 |

|                                  |   |    |   |   |    |    |    |    |    |    |    |    |    |    |    |    |    |    |    |    |    |    |    |    |    |    |    |    |    |    |    |    |    |
|----------------------------------|---|----|---|---|----|----|----|----|----|----|----|----|----|----|----|----|----|----|----|----|----|----|----|----|----|----|----|----|----|----|----|----|----|
| Switzerland                      | 1 | 5  | 3 | 4 | 2  | 12 | 14 | 8  | 24 | 7  | 9  | 21 | 10 | 13 | 11 | 15 | 19 | 6  | 18 | 20 | 23 | 26 | 27 | 25 | 17 | 22 | 16 | 33 | 31 | 29 | 28 | 32 | 30 |
| Denmark                          | 1 | 3  | 4 | 2 | 5  | 14 | 20 | 9  | 22 | 10 | 7  | 17 | 11 | 12 | 8  | 13 | 18 | 6  | 16 | 24 | 26 | 25 | 27 | 21 | 19 | 23 | 15 | 33 | 32 | 29 | 28 | 31 | 30 |
| Finland                          | 1 | 5  | 3 | 4 | 2  | 14 | 15 | 8  | 25 | 6  | 13 | 22 | 9  | 12 | 10 | 11 | 18 | 7  | 16 | 20 | 26 | 21 | 29 | 27 | 17 | 23 | 19 | 33 | 31 | 24 | 28 | 32 | 30 |
| Scotland                         | 1 | 2  | 3 | 4 | 5  | 10 | 18 | 7  | 21 | 8  | 9  | 12 | 13 | 14 | 15 | 11 | 19 | 6  | 16 | 25 | 30 | 28 | 26 | 22 | 20 | 23 | 17 | 33 | 31 | 24 | 27 | 32 | 29 |
| Norway                           | 1 | 5  | 4 | 3 | 2  | 14 | 21 | 10 | 20 | 8  | 7  | 22 | 12 | 13 | 9  | 11 | 19 | 6  | 16 | 18 | 26 | 23 | 29 | 28 | 15 | 25 | 17 | 33 | 31 | 27 | 24 | 32 | 30 |
| Ireland                          | 1 | 5  | 2 | 3 | 4  | 11 | 20 | 8  | 19 | 7  | 10 | 15 | 13 | 12 | 9  | 14 | 21 | 6  | 16 | 22 | 26 | 27 | 25 | 29 | 18 | 23 | 17 | 33 | 30 | 24 | 28 | 31 | 32 |
| Wales                            | 1 | 3  | 4 | 2 | 5  | 9  | 19 | 8  | 22 | 7  | 10 | 14 | 12 | 11 | 15 | 13 | 20 | 6  | 16 | 25 | 30 | 29 | 27 | 23 | 18 | 21 | 17 | 33 | 31 | 24 | 28 | 32 | 26 |
| Northern Ireland                 | 1 | 3  | 2 | 4 | 5  | 8  | 20 | 9  | 21 | 7  | 10 | 16 | 11 | 12 | 13 | 14 | 19 | 6  | 15 | 25 | 30 | 27 | 26 | 29 | 17 | 22 | 18 | 33 | 31 | 23 | 24 | 32 | 28 |
| Cyprus                           | 1 | 5  | 2 | 4 | 3  | 10 | 16 | 8  | 22 | 7  | 6  | 28 | 13 | 9  | 12 | 17 | 21 | 11 | 15 | 19 | 23 | 26 | 24 | 30 | 18 | 20 | 14 | 31 | 27 | 25 | 33 | 32 | 29 |
| Luxembourg                       | 1 | 4  | 2 | 3 | 5  | 13 | 15 | 9  | 26 | 11 | 10 | 21 | 12 | 7  | 8  | 19 | 17 | 6  | 14 | 16 | 22 | 29 | 23 | 25 | 20 | 24 | 18 | 32 | 31 | 28 | 27 | 33 | 30 |
| Malta                            | 1 | 4  | 2 | 3 | 5  | 11 | 22 | 9  | 26 | 8  | 6  | 25 | 10 | 7  | 12 | 14 | 17 | 13 | 15 | 16 | 32 | 27 | 20 | 29 | 19 | 18 | 21 | 28 | 31 | 24 | 23 | 33 | 30 |
| Iceland                          | 1 | 4  | 3 | 5 | 2  | 13 | 20 | 7  | 24 | 11 | 9  | 17 | 14 | 15 | 6  | 10 | 18 | 8  | 19 | 12 | 22 | 27 | 29 | 30 | 16 | 23 | 21 | 33 | 28 | 25 | 26 | 31 | 32 |
| Andorra                          | 1 | 5  | 2 | 4 | 3  | 11 | 21 | 9  | 23 | 8  | 6  | 20 | 13 | 12 | 10 | 14 | 17 | 7  | 15 | 19 | 30 | 26 | 28 | 29 | 18 | 22 | 16 | 33 | 31 | 24 | 25 | 32 | 27 |
| <b>Eastern SSA</b>               | 1 | 10 | 3 | 5 | 7  | 11 | 8  | 4  | 2  | 6  | 16 | 9  | 18 | 23 | 12 | 14 | 15 | 28 | 13 | 17 | 21 | 27 | 26 | 30 | 25 | 19 | 31 | 24 | 20 | 22 | 33 | 29 | 32 |
| Ethiopia                         | 1 | 7  | 3 | 4 | 12 | 9  | 15 | 5  | 2  | 6  | 19 | 14 | 22 | 26 | 8  | 13 | 16 | 30 | 10 | 11 | 24 | 25 | 28 | 31 | 27 | 18 | 29 | 23 | 17 | 20 | 33 | 21 | 32 |
| Tanzania                         | 3 | 9  | 4 | 6 | 5  | 10 | 8  | 2  | 1  | 7  | 16 | 14 | 15 | 20 | 12 | 11 | 22 | 27 | 13 | 21 | 18 | 29 | 26 | 28 | 23 | 17 | 31 | 24 | 19 | 25 | 33 | 30 | 32 |
| Kenya                            | 1 | 10 | 3 | 5 | 6  | 7  | 9  | 4  | 2  | 11 | 22 | 8  | 14 | 25 | 15 | 17 | 12 | 29 | 13 | 27 | 24 | 21 | 18 | 26 | 19 | 20 | 30 | 16 | 23 | 28 | 31 | 32 | 33 |
| Uganda                           | 9 | 10 | 4 | 8 | 3  | 11 | 7  | 1  | 2  | 5  | 20 | 6  | 16 | 19 | 15 | 12 | 14 | 27 | 13 | 17 | 23 | 29 | 28 | 25 | 24 | 21 | 32 | 18 | 26 | 22 | 31 | 30 | 33 |
| Mozambique                       | 4 | 6  | 3 | 5 | 18 | 10 | 2  | 7  | 1  | 11 | 19 | 8  | 22 | 20 | 9  | 15 | 17 | 26 | 13 | 21 | 12 | 27 | 24 | 28 | 25 | 14 | 30 | 31 | 16 | 23 | 33 | 29 | 32 |
| Madagascar                       | 3 | 10 | 2 | 5 | 6  | 8  | 11 | 4  | 1  | 9  | 16 | 7  | 18 | 19 | 13 | 14 | 15 | 27 | 12 | 21 | 17 | 29 | 25 | 28 | 26 | 20 | 31 | 22 | 24 | 23 | 33 | 30 | 32 |
| Zambia                           | 4 | 9  | 3 | 5 | 6  | 10 | 8  | 2  | 1  | 7  | 15 | 14 | 16 | 20 | 11 | 12 | 19 | 27 | 13 | 22 | 18 | 29 | 25 | 28 | 26 | 17 | 31 | 23 | 21 | 24 | 33 | 30 | 32 |
| Malawi                           | 6 | 12 | 5 | 9 | 8  | 13 | 10 | 2  | 1  | 4  | 7  | 3  | 16 | 20 | 19 | 11 | 14 | 15 | 17 | 18 | 22 | 28 | 27 | 32 | 23 | 21 | 31 | 26 | 24 | 25 | 29 | 30 | 33 |
| Somalia                          | 3 | 11 | 4 | 5 | 7  | 9  | 10 | 2  | 1  | 8  | 18 | 6  | 20 | 22 | 14 | 12 | 17 | 27 | 13 | 25 | 15 | 28 | 24 | 29 | 26 | 16 | 31 | 23 | 21 | 19 | 33 | 30 | 32 |
| Rwanda                           | 3 | 10 | 2 | 6 | 5  | 11 | 8  | 4  | 1  | 7  | 17 | 9  | 16 | 19 | 14 | 13 | 15 | 27 | 12 | 20 | 21 | 29 | 25 | 28 | 23 | 18 | 31 | 24 | 22 | 26 | 33 | 30 | 32 |
| Burundi                          | 2 | 10 | 4 | 7 | 6  | 9  | 11 | 3  | 1  | 8  | 18 | 5  | 17 | 23 | 13 | 12 | 14 | 28 | 15 | 20 | 16 | 29 | 21 | 27 | 26 | 19 | 31 | 22 | 25 | 24 | 33 | 30 | 32 |
| South Sudan                      | 3 | 10 | 4 | 6 | 8  | 11 | 9  | 2  | 1  | 7  | 18 | 5  | 16 | 20 | 13 | 12 | 17 | 27 | 14 | 24 | 15 | 29 | 25 | 28 | 26 | 19 | 31 | 22 | 23 | 21 | 32 | 30 | 33 |
| Eritrea                          | 4 | 11 | 2 | 5 | 7  | 8  | 9  | 3  | 1  | 6  | 16 | 10 | 18 | 20 | 13 | 14 | 15 | 26 | 12 | 23 | 19 | 29 | 25 | 28 | 27 | 17 | 31 | 21 | 24 | 22 | 33 | 30 | 32 |
| Djibouti                         | 3 | 7  | 2 | 5 | 6  | 11 | 9  | 4  | 1  | 8  | 14 | 10 | 15 | 18 | 16 | 13 | 17 | 27 | 12 | 20 | 24 | 29 | 23 | 28 | 22 | 19 | 31 | 21 | 25 | 26 | 33 | 30 | 32 |
| Comoros                          | 3 | 8  | 2 | 6 | 5  | 11 | 9  | 4  | 1  | 10 | 14 | 7  | 13 | 18 | 16 | 17 | 15 | 27 | 12 | 20 | 23 | 28 | 24 | 29 | 21 | 19 | 31 | 22 | 26 | 25 | 33 | 30 | 32 |
| <b>High-income North America</b> | 1 | 4  | 3 | 5 | 2  | 13 | 14 | 12 | 21 | 7  | 10 | 20 | 11 | 8  | 15 | 9  | 16 | 6  | 19 | 18 | 26 | 27 | 22 | 25 | 17 | 24 | 23 | 33 | 30 | 28 | 29 | 32 | 31 |
| United States                    | 1 | 4  | 3 | 5 | 2  | 14 | 13 | 12 | 20 | 7  | 11 | 21 | 10 | 8  | 16 | 9  | 15 | 6  | 19 | 17 | 26 | 27 | 22 | 25 | 18 | 24 | 23 | 32 | 30 | 28 | 29 | 33 | 31 |
| Canada                           | 1 | 3  | 4 | 2 | 5  | 9  | 15 | 10 | 22 | 6  | 8  | 18 | 12 | 11 | 13 | 14 | 19 | 7  | 17 | 21 | 27 | 23 | 24 | 29 | 16 | 26 | 20 | 33 | 31 | 25 | 28 | 32 | 30 |

|                                 |    |   |   |   |    |    |    |    |    |    |    |    |    |    |    |    |    |    |    |    |    |    |    |    |    |    |    |    |    |    |    |    |    |
|---------------------------------|----|---|---|---|----|----|----|----|----|----|----|----|----|----|----|----|----|----|----|----|----|----|----|----|----|----|----|----|----|----|----|----|----|
| <b>Central Latin America</b>    | 1  | 7 | 3 | 4 | 2  | 5  | 9  | 11 | 6  | 14 | 18 | 27 | 12 | 10 | 16 | 8  | 21 | 25 | 13 | 15 | 23 | 20 | 26 | 31 | 24 | 22 | 30 | 32 | 17 | 28 | 19 | 29 | 33 |
| Mexico                          | 1  | 7 | 3 | 4 | 2  | 6  | 9  | 10 | 5  | 16 | 19 | 27 | 13 | 12 | 18 | 8  | 21 | 23 | 11 | 14 | 25 | 20 | 26 | 31 | 24 | 22 | 30 | 33 | 17 | 28 | 15 | 29 | 32 |
| Colombia                        | 1  | 6 | 3 | 4 | 2  | 5  | 11 | 8  | 7  | 10 | 17 | 26 | 12 | 9  | 16 | 15 | 21 | 20 | 13 | 14 | 23 | 19 | 27 | 31 | 24 | 25 | 29 | 32 | 18 | 28 | 22 | 30 | 33 |
| Venezuela                       | 1  | 6 | 3 | 5 | 2  | 7  | 11 | 10 | 4  | 13 | 15 | 24 | 12 | 9  | 18 | 8  | 19 | 26 | 14 | 16 | 28 | 25 | 17 | 29 | 22 | 21 | 31 | 32 | 20 | 27 | 23 | 30 | 33 |
| Guatemala                       | 1  | 8 | 6 | 7 | 4  | 2  | 5  | 12 | 3  | 16 | 22 | 21 | 14 | 10 | 15 | 9  | 20 | 28 | 17 | 18 | 11 | 19 | 25 | 29 | 26 | 23 | 32 | 27 | 13 | 30 | 24 | 31 | 33 |
| Honduras                        | 1  | 6 | 2 | 5 | 3  | 7  | 20 | 11 | 8  | 18 | 21 | 26 | 15 | 4  | 19 | 14 | 17 | 29 | 9  | 23 | 13 | 16 | 27 | 24 | 22 | 12 | 30 | 28 | 10 | 32 | 33 | 25 | 31 |
| Nicaragua                       | 1  | 8 | 3 | 5 | 4  | 6  | 7  | 9  | 2  | 15 | 19 | 26 | 11 | 16 | 17 | 10 | 21 | 27 | 12 | 14 | 20 | 18 | 24 | 32 | 25 | 22 | 29 | 31 | 13 | 30 | 23 | 28 | 33 |
| El Salvador                     | 1  | 7 | 3 | 6 | 2  | 5  | 9  | 13 | 4  | 16 | 19 | 22 | 11 | 8  | 15 | 14 | 20 | 29 | 12 | 18 | 10 | 17 | 24 | 26 | 23 | 25 | 31 | 28 | 21 | 27 | 30 | 32 | 33 |
| Costa Rica                      | 1  | 7 | 3 | 5 | 2  | 4  | 10 | 12 | 6  | 9  | 14 | 27 | 11 | 8  | 16 | 13 | 22 | 18 | 17 | 15 | 28 | 24 | 26 | 31 | 20 | 23 | 30 | 32 | 21 | 25 | 19 | 29 | 33 |
| Panama                          | 3  | 7 | 2 | 4 | 1  | 5  | 10 | 9  | 6  | 13 | 17 | 25 | 12 | 8  | 14 | 11 | 18 | 26 | 16 | 15 | 23 | 24 | 22 | 28 | 20 | 21 | 31 | 29 | 19 | 30 | 27 | 32 | 33 |
| <b>Tropical Latin America</b>   | 1  | 5 | 2 | 4 | 3  | 7  | 12 | 8  | 6  | 16 | 14 | 13 | 9  | 17 | 10 | 11 | 15 | 21 | 18 | 20 | 26 | 23 | 19 | 22 | 25 | 24 | 30 | 32 | 28 | 29 | 27 | 33 | 31 |
| Brazil                          | 1  | 5 | 2 | 4 | 3  | 7  | 12 | 8  | 6  | 16 | 14 | 13 | 9  | 17 | 10 | 11 | 15 | 21 | 18 | 20 | 26 | 23 | 19 | 22 | 25 | 24 | 30 | 32 | 28 | 29 | 27 | 33 | 31 |
| Paraguay                        | 8  | 4 | 1 | 5 | 3  | 6  | 15 | 7  | 2  | 14 | 18 | 13 | 10 | 11 | 20 | 9  | 17 | 27 | 12 | 16 | 19 | 22 | 23 | 26 | 28 | 21 | 30 | 32 | 24 | 29 | 25 | 31 | 33 |
| <b>Eastern Europe</b>           | 1  | 4 | 3 | 2 | 6  | 5  | 19 | 7  | 12 | 14 | 11 | 21 | 10 | 9  | 16 | 8  | 17 | 13 | 15 | 18 | 27 | 26 | 20 | 22 | 24 | 28 | 25 | 32 | 29 | 23 | 30 | 31 | 33 |
| Russian Federation              | 1  | 4 | 2 | 3 | 6  | 5  | 19 | 7  | 12 | 14 | 11 | 20 | 10 | 9  | 17 | 8  | 18 | 13 | 15 | 16 | 27 | 26 | 21 | 23 | 24 | 28 | 25 | 33 | 29 | 22 | 30 | 31 | 32 |
| Ukraine                         | 1  | 3 | 4 | 2 | 7  | 5  | 20 | 6  | 16 | 17 | 10 | 22 | 11 | 8  | 12 | 9  | 13 | 14 | 15 | 19 | 25 | 26 | 18 | 21 | 27 | 28 | 24 | 31 | 30 | 23 | 29 | 32 | 33 |
| Belarus                         | 1  | 4 | 5 | 2 | 3  | 6  | 22 | 7  | 9  | 14 | 11 | 21 | 12 | 13 | 16 | 8  | 15 | 10 | 17 | 19 | 26 | 27 | 18 | 20 | 24 | 28 | 25 | 32 | 29 | 23 | 30 | 31 | 33 |
| Moldova                         | 1  | 4 | 3 | 2 | 5  | 6  | 7  | 13 | 8  | 17 | 12 | 22 | 9  | 11 | 16 | 10 | 18 | 20 | 19 | 21 | 23 | 28 | 14 | 15 | 25 | 27 | 30 | 26 | 29 | 24 | 31 | 33 | 32 |
| Lithuania                       | 2  | 4 | 5 | 3 | 1  | 6  | 22 | 9  | 17 | 13 | 11 | 19 | 10 | 7  | 15 | 8  | 18 | 12 | 14 | 20 | 28 | 25 | 16 | 21 | 24 | 26 | 23 | 32 | 30 | 27 | 29 | 31 | 33 |
| Latvia                          | 1  | 3 | 4 | 2 | 5  | 6  | 21 | 14 | 20 | 13 | 8  | 17 | 10 | 7  | 15 | 9  | 16 | 11 | 12 | 18 | 27 | 26 | 19 | 24 | 22 | 28 | 23 | 32 | 30 | 25 | 29 | 31 | 33 |
| Estonia                         | 1  | 4 | 5 | 3 | 2  | 6  | 22 | 13 | 16 | 12 | 11 | 21 | 9  | 7  | 15 | 8  | 18 | 10 | 14 | 17 | 26 | 28 | 23 | 24 | 19 | 25 | 20 | 32 | 29 | 27 | 30 | 31 | 33 |
| <b>High-income Asia Pacific</b> | 9  | 2 | 4 | 1 | 5  | 3  | 6  | 10 | 16 | 11 | 12 | 13 | 7  | 18 | 17 | 15 | 19 | 24 | 20 | 14 | 26 | 8  | 22 | 25 | 21 | 23 | 32 | 31 | 28 | 29 | 27 | 33 | 30 |
| Japan                           | 9  | 2 | 4 | 1 | 5  | 3  | 6  | 11 | 17 | 10 | 12 | 13 | 7  | 15 | 19 | 14 | 16 | 25 | 20 | 18 | 26 | 8  | 24 | 23 | 21 | 22 | 31 | 32 | 28 | 30 | 27 | 33 | 29 |
| South Korea                     | 14 | 2 | 5 | 1 | 6  | 3  | 4  | 10 | 16 | 12 | 11 | 17 | 9  | 19 | 13 | 15 | 20 | 24 | 18 | 7  | 22 | 8  | 21 | 25 | 23 | 26 | 31 | 29 | 27 | 28 | 32 | 30 | 33 |
| Singapore                       | 7  | 3 | 2 | 1 | 4  | 6  | 5  | 8  | 13 | 9  | 16 | 20 | 12 | 11 | 10 | 17 | 19 | 21 | 15 | 14 | 29 | 24 | 23 | 27 | 25 | 22 | 30 | 18 | 28 | 26 | 31 | 32 | 33 |
| Brunei                          | 6  | 3 | 1 | 2 | 9  | 5  | 8  | 11 | 4  | 7  | 17 | 27 | 18 | 16 | 15 | 12 | 14 | 24 | 10 | 13 | 31 | 23 | 29 | 22 | 21 | 20 | 33 | 19 | 30 | 25 | 28 | 26 | 32 |
| <b>Central SSA</b>              | 1  | 4 | 3 | 5 | 9  | 10 | 7  | 6  | 2  | 15 | 12 | 8  | 16 | 20 | 13 | 11 | 17 | 28 | 18 | 25 | 14 | 22 | 21 | 30 | 23 | 19 | 33 | 27 | 24 | 26 | 31 | 29 | 32 |
| DRC                             | 1  | 4 | 3 | 5 | 9  | 8  | 7  | 6  | 2  | 16 | 14 | 10 | 18 | 20 | 12 | 11 | 15 | 29 | 17 | 26 | 13 | 22 | 21 | 30 | 24 | 19 | 33 | 27 | 23 | 25 | 31 | 28 | 32 |
| Angola                          | 1  | 4 | 3 | 5 | 9  | 10 | 7  | 6  | 2  | 15 | 12 | 8  | 14 | 20 | 13 | 11 | 17 | 28 | 16 | 25 | 18 | 24 | 21 | 30 | 22 | 19 | 33 | 26 | 23 | 27 | 31 | 29 | 32 |
| Congo                           | 2  | 5 | 3 | 4 | 6  | 10 | 9  | 8  | 1  | 16 | 12 | 7  | 14 | 19 | 15 | 11 | 17 | 26 | 13 | 22 | 20 | 24 | 21 | 30 | 23 | 18 | 33 | 25 | 27 | 29 | 32 | 28 | 31 |
| CAR                             | 2  | 4 | 3 | 7 | 10 | 5  | 9  | 8  | 1  | 15 | 17 | 6  | 16 | 21 | 12 | 11 | 13 | 29 | 18 | 28 | 14 | 23 | 19 | 30 | 25 | 20 | 33 | 24 | 26 | 22 | 31 | 27 | 32 |

|                        |    |   |   |   |    |    |    |    |    |    |    |    |    |    |    |    |    |    |    |    |    |    |    |    |    |    |    |    |    |    |    |    |    |
|------------------------|----|---|---|---|----|----|----|----|----|----|----|----|----|----|----|----|----|----|----|----|----|----|----|----|----|----|----|----|----|----|----|----|----|
| Gabon                  | 1  | 4 | 3 | 5 | 6  | 11 | 8  | 9  | 2  | 16 | 10 | 7  | 12 | 19 | 17 | 13 | 14 | 26 | 15 | 24 | 21 | 23 | 20 | 25 | 22 | 18 | 33 | 27 | 28 | 30 | 32 | 29 | 31 |
| Equatorial Guinea      | 1  | 5 | 3 | 4 | 8  | 14 | 6  | 9  | 2  | 12 | 15 | 7  | 11 | 19 | 17 | 10 | 16 | 25 | 13 | 21 | 20 | 24 | 23 | 27 | 22 | 18 | 32 | 28 | 26 | 29 | 31 | 30 | 33 |
| <b>Central Europe</b>  | 1  | 2 | 4 | 3 | 5  | 8  | 17 | 10 | 13 | 14 | 6  | 24 | 9  | 7  | 15 | 11 | 18 | 12 | 16 | 22 | 29 | 20 | 19 | 21 | 26 | 28 | 23 | 32 | 30 | 27 | 25 | 31 | 33 |
| Poland                 | 1  | 2 | 4 | 3 | 5  | 9  | 22 | 8  | 16 | 13 | 6  | 23 | 10 | 7  | 12 | 11 | 17 | 15 | 14 | 19 | 29 | 20 | 18 | 24 | 26 | 28 | 21 | 33 | 31 | 27 | 25 | 32 | 30 |
| Romania                | 1  | 3 | 4 | 2 | 5  | 8  | 9  | 11 | 6  | 17 | 7  | 22 | 10 | 12 | 14 | 13 | 15 | 19 | 18 | 21 | 25 | 26 | 16 | 20 | 27 | 28 | 23 | 30 | 31 | 29 | 24 | 32 | 33 |
| Czech Republic         | 1  | 3 | 4 | 2 | 5  | 12 | 18 | 9  | 16 | 13 | 7  | 21 | 10 | 11 | 17 | 8  | 19 | 6  | 14 | 20 | 28 | 15 | 25 | 24 | 23 | 29 | 26 | 33 | 30 | 27 | 22 | 31 | 32 |
| Hungary                | 1  | 3 | 4 | 2 | 5  | 9  | 19 | 15 | 16 | 13 | 6  | 22 | 7  | 10 | 20 | 8  | 12 | 11 | 18 | 24 | 28 | 21 | 17 | 14 | 26 | 27 | 23 | 30 | 31 | 29 | 25 | 32 | 33 |
| Serbia                 | 1  | 2 | 4 | 3 | 5  | 10 | 15 | 8  | 11 | 16 | 6  | 25 | 9  | 7  | 12 | 13 | 19 | 14 | 18 | 22 | 20 | 21 | 17 | 24 | 28 | 29 | 27 | 31 | 30 | 26 | 23 | 32 | 33 |
| Bulgaria               | 1  | 4 | 3 | 2 | 5  | 8  | 13 | 11 | 10 | 14 | 7  | 24 | 9  | 6  | 12 | 15 | 19 | 18 | 16 | 20 | 25 | 23 | 17 | 21 | 29 | 27 | 28 | 32 | 30 | 22 | 26 | 31 | 33 |
| Slovakia               | 1  | 3 | 4 | 2 | 5  | 6  | 20 | 15 | 13 | 12 | 10 | 24 | 9  | 8  | 17 | 7  | 18 | 11 | 16 | 26 | 29 | 14 | 25 | 19 | 21 | 28 | 22 | 31 | 30 | 27 | 23 | 32 | 33 |
| Croatia                | 1  | 3 | 4 | 2 | 5  | 8  | 15 | 14 | 17 | 13 | 7  | 25 | 11 | 6  | 10 | 9  | 19 | 12 | 16 | 24 | 29 | 18 | 20 | 22 | 23 | 28 | 21 | 33 | 31 | 27 | 26 | 32 | 30 |
| Bosnia and Herzegovina | 1  | 2 | 4 | 3 | 5  | 6  | 9  | 13 | 14 | 17 | 8  | 23 | 7  | 11 | 12 | 10 | 21 | 16 | 15 | 20 | 30 | 19 | 18 | 24 | 26 | 25 | 22 | 32 | 29 | 28 | 27 | 31 | 33 |
| Albania                | 1  | 2 | 3 | 5 | 4  | 7  | 9  | 6  | 13 | 15 | 17 | 25 | 10 | 11 | 8  | 12 | 18 | 20 | 19 | 16 | 26 | 27 | 14 | 29 | 30 | 22 | 23 | 32 | 28 | 24 | 21 | 31 | 33 |
| Macedonia              | 1  | 2 | 3 | 4 | 5  | 6  | 11 | 13 | 14 | 18 | 7  | 26 | 10 | 8  | 12 | 17 | 21 | 9  | 16 | 19 | 27 | 23 | 15 | 28 | 29 | 25 | 22 | 32 | 30 | 24 | 20 | 31 | 33 |
| Slovenia               | 1  | 3 | 5 | 2 | 4  | 8  | 15 | 10 | 21 | 7  | 12 | 26 | 9  | 11 | 17 | 13 | 20 | 6  | 19 | 22 | 29 | 16 | 24 | 18 | 23 | 25 | 14 | 33 | 31 | 30 | 27 | 28 | 32 |
| Montenegro             | 1  | 2 | 3 | 4 | 5  | 11 | 14 | 19 | 12 | 17 | 6  | 23 | 7  | 10 | 8  | 13 | 20 | 15 | 18 | 16 | 31 | 24 | 9  | 27 | 28 | 26 | 21 | 33 | 29 | 22 | 25 | 30 | 32 |
| <b>Central Asia</b>    | 1  | 3 | 2 | 5 | 11 | 4  | 7  | 9  | 6  | 17 | 15 | 13 | 14 | 10 | 12 | 8  | 18 | 23 | 16 | 20 | 21 | 27 | 19 | 26 | 29 | 22 | 30 | 31 | 25 | 24 | 28 | 32 | 33 |
| Uzbekistan             | 1  | 5 | 2 | 6 | 14 | 3  | 8  | 10 | 4  | 13 | 16 | 12 | 17 | 9  | 7  | 11 | 15 | 26 | 18 | 25 | 20 | 31 | 19 | 22 | 29 | 21 | 30 | 27 | 23 | 24 | 28 | 32 | 33 |
| Kazakhstan             | 1  | 3 | 2 | 4 | 10 | 5  | 12 | 8  | 6  | 19 | 15 | 11 | 13 | 9  | 16 | 7  | 18 | 20 | 14 | 17 | 27 | 26 | 21 | 25 | 30 | 22 | 29 | 31 | 24 | 23 | 28 | 32 | 33 |
| Azerbaijan             | 1  | 3 | 2 | 5 | 7  | 4  | 9  | 10 | 11 | 19 | 15 | 8  | 14 | 13 | 12 | 6  | 21 | 25 | 17 | 20 | 16 | 24 | 18 | 28 | 27 | 23 | 29 | 31 | 26 | 22 | 32 | 30 | 33 |
| Tajikistan             | 1  | 6 | 3 | 5 | 14 | 2  | 9  | 7  | 12 | 13 | 18 | 11 | 15 | 10 | 4  | 8  | 21 | 25 | 16 | 26 | 17 | 28 | 22 | 24 | 27 | 19 | 32 | 23 | 20 | 30 | 33 | 31 | 29 |
| Kyrgyzstan             | 1  | 5 | 2 | 6 | 14 | 3  | 7  | 8  | 4  | 19 | 16 | 15 | 12 | 10 | 13 | 9  | 17 | 22 | 11 | 18 | 20 | 26 | 24 | 25 | 29 | 21 | 31 | 30 | 23 | 27 | 28 | 32 | 33 |
| Turkmenistan           | 1  | 4 | 2 | 7 | 12 | 5  | 10 | 9  | 3  | 17 | 16 | 8  | 15 | 20 | 11 | 6  | 14 | 28 | 13 | 18 | 19 | 29 | 26 | 21 | 24 | 22 | 31 | 30 | 25 | 23 | 27 | 32 | 33 |
| Georgia                | 1  | 3 | 2 | 4 | 7  | 5  | 10 | 11 | 8  | 18 | 9  | 22 | 13 | 6  | 15 | 12 | 17 | 20 | 14 | 21 | 19 | 23 | 16 | 25 | 28 | 27 | 29 | 32 | 30 | 26 | 24 | 33 | 31 |
| Mongolia               | 2  | 4 | 7 | 8 | 17 | 3  | 1  | 9  | 6  | 16 | 20 | 5  | 11 | 13 | 12 | 10 | 15 | 30 | 14 | 21 | 24 | 19 | 22 | 25 | 26 | 18 | 32 | 27 | 23 | 29 | 33 | 28 | 31 |
| Armenia                | 1  | 3 | 2 | 4 | 6  | 5  | 9  | 8  | 12 | 17 | 7  | 21 | 10 | 11 | 13 | 14 | 20 | 23 | 15 | 18 | 19 | 22 | 16 | 30 | 27 | 26 | 24 | 33 | 28 | 32 | 25 | 31 | 29 |
| <b>Southern SSA</b>    | 1  | 5 | 3 | 6 | 4  | 10 | 8  | 9  | 2  | 16 | 12 | 7  | 11 | 18 | 19 | 15 | 13 | 23 | 14 | 24 | 17 | 25 | 21 | 26 | 20 | 22 | 31 | 28 | 32 | 29 | 30 | 33 | 27 |
| South Africa           | 1  | 4 | 3 | 6 | 5  | 10 | 8  | 14 | 2  | 17 | 11 | 7  | 9  | 18 | 19 | 12 | 13 | 23 | 15 | 24 | 16 | 25 | 21 | 27 | 20 | 22 | 31 | 28 | 32 | 29 | 30 | 33 | 26 |
| Zimbabwe               | 11 | 9 | 2 | 7 | 3  | 8  | 4  | 5  | 1  | 10 | 12 | 6  | 13 | 16 | 15 | 19 | 18 | 24 | 14 | 22 | 21 | 25 | 23 | 28 | 17 | 20 | 33 | 27 | 29 | 26 | 30 | 32 | 31 |
| Namibia                | 1  | 8 | 2 | 6 | 4  | 13 | 11 | 5  | 3  | 9  | 18 | 14 | 12 | 20 | 19 | 16 | 7  | 10 | 17 | 24 | 21 | 29 | 15 | 22 | 25 | 23 | 32 | 28 | 31 | 26 | 30 | 33 | 27 |
| Botswana               | 1  | 5 | 3 | 6 | 4  | 12 | 8  | 9  | 2  | 16 | 14 | 7  | 10 | 17 | 18 | 15 | 13 | 20 | 11 | 23 | 19 | 25 | 24 | 26 | 21 | 22 | 31 | 27 | 30 | 29 | 32 | 33 | 28 |
| Lesotho                | 1  | 4 | 3 | 8 | 6  | 9  | 7  | 10 | 2  | 15 | 16 | 5  | 12 | 18 | 20 | 14 | 11 | 22 | 13 | 25 | 17 | 26 | 19 | 28 | 23 | 21 | 33 | 27 | 31 | 29 | 30 | 32 | 24 |

|                                  |   |   |   |   |    |    |    |    |    |    |    |    |    |    |    |    |    |    |    |    |    |    |    |    |    |    |    |    |    |    |    |    |    |
|----------------------------------|---|---|---|---|----|----|----|----|----|----|----|----|----|----|----|----|----|----|----|----|----|----|----|----|----|----|----|----|----|----|----|----|----|
| Swaziland                        | 1 | 5 | 3 | 8 | 7  | 10 | 6  | 9  | 2  | 15 | 16 | 4  | 11 | 19 | 17 | 12 | 13 | 22 | 14 | 24 | 18 | 27 | 20 | 26 | 23 | 21 | 32 | 25 | 30 | 29 | 31 | 33 | 28 |
| <b>Southern Latin America</b>    | 3 | 5 | 1 | 2 | 4  | 7  | 15 | 12 | 6  | 13 | 11 | 17 | 9  | 14 | 19 | 8  | 22 | 20 | 18 | 21 | 25 | 10 | 23 | 30 | 24 | 26 | 29 | 33 | 27 | 28 | 16 | 31 | 32 |
| Argentina                        | 3 | 4 | 1 | 2 | 5  | 8  | 17 | 12 | 6  | 14 | 10 | 15 | 9  | 13 | 18 | 7  | 20 | 21 | 16 | 23 | 24 | 11 | 22 | 30 | 25 | 26 | 29 | 33 | 27 | 28 | 19 | 32 | 31 |
| Chile                            | 2 | 6 | 4 | 3 | 1  | 5  | 16 | 13 | 8  | 14 | 11 | 18 | 12 | 15 | 22 | 9  | 23 | 20 | 19 | 17 | 25 | 7  | 26 | 30 | 21 | 24 | 29 | 33 | 27 | 28 | 10 | 31 | 32 |
| Uruguay                          | 1 | 4 | 2 | 3 | 5  | 7  | 22 | 15 | 8  | 12 | 10 | 14 | 9  | 13 | 20 | 6  | 17 | 18 | 16 | 24 | 23 | 11 | 19 | 28 | 21 | 27 | 26 | 32 | 31 | 29 | 25 | 30 | 33 |
| <b>Andean Latin America</b>      | 1 | 7 | 4 | 5 | 2  | 3  | 8  | 12 | 6  | 9  | 19 | 25 | 14 | 10 | 16 | 11 | 21 | 24 | 15 | 13 | 18 | 17 | 27 | 28 | 23 | 22 | 31 | 33 | 20 | 29 | 26 | 30 | 32 |
| Peru                             | 1 | 7 | 4 | 3 | 2  | 5  | 8  | 12 | 6  | 10 | 19 | 26 | 13 | 11 | 16 | 9  | 20 | 24 | 15 | 14 | 18 | 17 | 28 | 27 | 22 | 23 | 31 | 33 | 21 | 29 | 25 | 30 | 32 |
| Ecuador                          | 1 | 7 | 4 | 5 | 2  | 3  | 8  | 12 | 6  | 11 | 20 | 26 | 14 | 9  | 15 | 13 | 22 | 23 | 16 | 10 | 19 | 18 | 27 | 28 | 24 | 21 | 31 | 32 | 17 | 29 | 25 | 30 | 33 |
| Bolivia                          | 1 | 7 | 5 | 6 | 4  | 2  | 8  | 9  | 3  | 10 | 19 | 22 | 13 | 12 | 18 | 11 | 21 | 25 | 16 | 15 | 17 | 14 | 26 | 27 | 24 | 23 | 33 | 32 | 20 | 28 | 29 | 30 | 31 |
| <b>Caribbean</b>                 | 4 | 5 | 2 | 3 | 1  | 8  | 11 | 9  | 6  | 12 | 10 | 17 | 14 | 7  | 19 | 15 | 16 | 25 | 18 | 20 | 21 | 26 | 13 | 23 | 22 | 24 | 28 | 30 | 29 | 27 | 32 | 31 | 33 |
| Haiti                            | 4 | 7 | 3 | 6 | 2  | 5  | 10 | 8  | 1  | 11 | 14 | 16 | 20 | 13 | 17 | 9  | 18 | 29 | 15 | 23 | 12 | 22 | 19 | 27 | 24 | 21 | 32 | 28 | 25 | 26 | 33 | 30 | 31 |
| Cuba                             | 5 | 2 | 4 | 3 | 1  | 10 | 17 | 11 | 9  | 13 | 8  | 15 | 14 | 6  | 18 | 16 | 12 | 23 | 20 | 19 | 28 | 27 | 7  | 22 | 21 | 26 | 25 | 32 | 30 | 24 | 31 | 29 | 33 |
| Dominican Republic               | 3 | 6 | 2 | 4 | 1  | 8  | 7  | 9  | 5  | 15 | 19 | 21 | 10 | 11 | 16 | 14 | 12 | 28 | 18 | 17 | 13 | 26 | 20 | 22 | 23 | 24 | 30 | 25 | 27 | 29 | 33 | 31 | 32 |
| Jamaica                          | 6 | 4 | 2 | 3 | 1  | 7  | 15 | 10 | 5  | 9  | 12 | 19 | 14 | 8  | 22 | 16 | 20 | 25 | 11 | 17 | 13 | 23 | 21 | 26 | 18 | 24 | 29 | 27 | 30 | 31 | 32 | 28 | 33 |
| Trinidad and Tobago              | 7 | 5 | 2 | 3 | 1  | 13 | 15 | 10 | 4  | 12 | 14 | 23 | 11 | 6  | 21 | 8  | 18 | 27 | 9  | 17 | 19 | 24 | 22 | 25 | 16 | 20 | 31 | 30 | 26 | 29 | 32 | 28 | 33 |
| Guyana                           | 4 | 7 | 2 | 5 | 1  | 8  | 12 | 11 | 3  | 14 | 16 | 19 | 13 | 6  | 20 | 10 | 15 | 26 | 9  | 17 | 18 | 24 | 22 | 27 | 23 | 31 | 30 | 32 | 21 | 28 | 33 | 25 | 29 |
| Suriname                         | 5 | 6 | 2 | 3 | 1  | 9  | 7  | 8  | 4  | 13 | 16 | 21 | 10 | 15 | 14 | 11 | 19 | 26 | 12 | 18 | 17 | 24 | 22 | 28 | 20 | 25 | 31 | 23 | 30 | 27 | 29 | 32 | 33 |
| Belize                           | 3 | 5 | 4 | 6 | 1  | 8  | 7  | 11 | 2  | 16 | 14 | 19 | 12 | 10 | 15 | 9  | 18 | 25 | 17 | 21 | 13 | 23 | 20 | 27 | 22 | 30 | 32 | 29 | 24 | 26 | 31 | 33 | 28 |
| The Bahamas                      | 4 | 6 | 1 | 3 | 2  | 8  | 13 | 11 | 5  | 12 | 20 | 16 | 18 | 7  | 21 | 10 | 14 | 22 | 9  | 17 | 26 | 25 | 19 | 23 | 15 | 24 | 27 | 30 | 31 | 29 | 33 | 28 | 32 |
| Barbados                         | 4 | 8 | 2 | 3 | 1  | 7  | 16 | 11 | 6  | 9  | 14 | 17 | 12 | 5  | 22 | 10 | 19 | 25 | 15 | 18 | 20 | 26 | 21 | 24 | 13 | 23 | 27 | 29 | 31 | 30 | 33 | 28 | 32 |
| Saint Lucia                      | 3 | 6 | 2 | 5 | 1  | 7  | 16 | 12 | 4  | 9  | 10 | 19 | 11 | 8  | 21 | 15 | 14 | 23 | 13 | 17 | 22 | 27 | 20 | 24 | 18 | 26 | 25 | 28 | 32 | 30 | 29 | 31 | 33 |
| Saint Vincent and the Grenadines | 4 | 7 | 2 | 5 | 1  | 6  | 12 | 10 | 3  | 9  | 15 | 20 | 14 | 8  | 22 | 13 | 11 | 24 | 16 | 17 | 19 | 27 | 18 | 23 | 21 | 26 | 25 | 30 | 31 | 29 | 32 | 28 | 33 |
| Grenada                          | 4 | 7 | 2 | 3 | 1  | 8  | 13 | 11 | 5  | 9  | 15 | 12 | 10 | 6  | 22 | 17 | 16 | 26 | 14 | 19 | 20 | 24 | 21 | 25 | 18 | 28 | 23 | 29 | 31 | 30 | 33 | 27 | 32 |
| Antigua and Barbuda              | 4 | 8 | 2 | 3 | 1  | 6  | 10 | 9  | 5  | 12 | 14 | 21 | 15 | 7  | 20 | 13 | 19 | 22 | 11 | 16 | 17 | 26 | 23 | 25 | 18 | 24 | 32 | 30 | 29 | 31 | 27 | 28 | 33 |
| Dominica                         | 4 | 7 | 2 | 3 | 1  | 5  | 12 | 8  | 6  | 9  | 13 | 17 | 14 | 11 | 24 | 10 | 15 | 27 | 20 | 21 | 18 | 25 | 19 | 22 | 16 | 26 | 30 | 31 | 23 | 29 | 33 | 28 | 32 |
| <b>Australasia</b>               | 1 | 6 | 5 | 3 | 2  | 9  | 17 | 8  | 24 | 7  | 11 | 18 | 10 | 13 | 15 | 12 | 14 | 4  | 20 | 19 | 25 | 23 | 30 | 27 | 16 | 22 | 21 | 33 | 31 | 28 | 29 | 32 | 26 |
| Australia                        | 1 | 6 | 5 | 3 | 2  | 9  | 17 | 8  | 25 | 7  | 11 | 18 | 10 | 13 | 15 | 12 | 14 | 4  | 20 | 19 | 26 | 23 | 29 | 27 | 16 | 22 | 21 | 33 | 31 | 28 | 30 | 32 | 24 |
| New Zealand                      | 1 | 6 | 4 | 3 | 2  | 11 | 18 | 8  | 23 | 7  | 10 | 16 | 12 | 13 | 15 | 9  | 17 | 5  | 19 | 21 | 28 | 22 | 27 | 29 | 14 | 24 | 20 | 33 | 31 | 26 | 25 | 32 | 30 |
| <b>Oceania</b>                   | 4 | 3 | 2 | 6 | 10 | 5  | 7  | 8  | 1  | 15 | 18 | 22 | 19 | 9  | 17 | 16 | 11 | 29 | 12 | 21 | 13 | 25 | 23 | 24 | 26 | 20 | 32 | 14 | 28 | 31 | 27 | 30 | 33 |
| Papua New Guinea                 | 6 | 2 | 3 | 7 | 10 | 4  | 5  | 8  | 1  | 15 | 18 | 23 | 20 | 9  | 17 | 16 | 14 | 30 | 12 | 21 | 11 | 25 | 22 | 24 | 27 | 19 | 33 | 13 | 26 | 29 | 31 | 28 | 32 |

|                                                                                                                                                                                                                                                                                                                                                                        |   |   |   |   |    |    |    |    |   |    |    |    |    |    |    |    |    |    |    |    |    |    |    |    |    |    |    |    |    |    |    |    |    |
|------------------------------------------------------------------------------------------------------------------------------------------------------------------------------------------------------------------------------------------------------------------------------------------------------------------------------------------------------------------------|---|---|---|---|----|----|----|----|---|----|----|----|----|----|----|----|----|----|----|----|----|----|----|----|----|----|----|----|----|----|----|----|----|
| Fiji                                                                                                                                                                                                                                                                                                                                                                   | 3 | 8 | 1 | 4 | 5  | 10 | 6  | 9  | 2 | 17 | 14 | 18 | 15 | 7  | 20 | 16 | 11 | 29 | 19 | 12 | 21 | 26 | 23 | 22 | 24 | 13 | 30 | 27 | 28 | 31 | 25 | 33 | 32 |
| Solomon Islands                                                                                                                                                                                                                                                                                                                                                        | 4 | 3 | 2 | 7 | 9  | 5  | 6  | 8  | 1 | 16 | 18 | 21 | 17 | 10 | 19 | 13 | 15 | 29 | 11 | 22 | 12 | 26 | 23 | 24 | 25 | 20 | 32 | 14 | 27 | 30 | 31 | 28 | 33 |
| Vanuatu                                                                                                                                                                                                                                                                                                                                                                | 1 | 4 | 2 | 7 | 6  | 8  | 5  | 9  | 3 | 17 | 14 | 23 | 18 | 10 | 20 | 15 | 11 | 26 | 13 | 21 | 12 | 24 | 22 | 25 | 28 | 16 | 31 | 19 | 27 | 29 | 33 | 30 | 32 |
| Samoa                                                                                                                                                                                                                                                                                                                                                                  | 1 | 7 | 2 | 4 | 6  | 5  | 11 | 9  | 3 | 10 | 16 | 24 | 15 | 8  | 20 | 18 | 17 | 22 | 12 | 13 | 14 | 25 | 27 | 32 | 23 | 21 | 30 | 19 | 29 | 28 | 26 | 31 | 33 |
| Kiribati                                                                                                                                                                                                                                                                                                                                                               | 6 | 3 | 2 | 8 | 13 | 7  | 5  | 9  | 1 | 16 | 20 | 12 | 17 | 10 | 21 | 11 | 4  | 30 | 18 | 28 | 15 | 24 | 25 | 22 | 26 | 19 | 31 | 23 | 29 | 32 | 14 | 27 | 33 |
| Federated States of Micronesia                                                                                                                                                                                                                                                                                                                                         | 3 | 2 | 1 | 5 | 9  | 7  | 6  | 10 | 4 | 16 | 15 | 22 | 14 | 8  | 19 | 12 | 13 | 27 | 11 | 20 | 18 | 26 | 23 | 24 | 25 | 21 | 30 | 17 | 28 | 33 | 32 | 29 | 31 |
| Tonga                                                                                                                                                                                                                                                                                                                                                                  | 2 | 3 | 1 | 9 | 6  | 8  | 4  | 12 | 5 | 11 | 17 | 19 | 13 | 10 | 18 | 14 | 16 | 28 | 15 | 20 | 21 | 27 | 25 | 26 | 24 | 22 | 30 | 23 | 29 | 31 | 7  | 32 | 33 |
| Marshall Islands                                                                                                                                                                                                                                                                                                                                                       | 4 | 3 | 1 | 5 | 9  | 7  | 6  | 10 | 2 | 15 | 17 | 21 | 14 | 8  | 20 | 12 | 13 | 27 | 11 | 18 | 19 | 26 | 23 | 24 | 25 | 22 | 31 | 16 | 28 | 32 | 29 | 30 | 33 |
| Colors correspond to the ranking, with dark red as the most common cancer and dark green as the least common cancer for the location indicated. Rankings do not include the "other malignant cancer" group. The numbers inside each box indicate the ranking. Abbreviations: SSA: Sub-Saharan Africa; DRC: Democratic Republic of Congo; CAR: Central African Republic |   |   |   |   |    |    |    |    |   |    |    |    |    |    |    |    |    |    |    |    |    |    |    |    |    |    |    |    |    |    |    |    |    |

Figure 5: Cancer ranking by total incidence based on global level for developing and developed regions and all countries, both sexes, 2017

| Country         | Tracheal, bronchus, and lung cancer | Colon and rectum cancer | Stomach cancer | Liver cancer | Breast cancer | Pancreatic cancer | Esophageal cancer | Prostate cancer | Other malignant neoplasms | Cervical cancer | Non-Hodgkin lymphoma | Brain and central nervous system cancer | Bladder cancer | Lip and oral cavity cancer | Ovarian cancer | Gallbladder and biliary tract cancer | Kidney cancer | Other leukemia | Larynx cancer | Other pharynx cancer | Multiple myeloma | Acute myeloid leukemia | Uterine cancer | Nasopharynx cancer | Non-melanoma skin cancer | Malignant skin melanoma | Acute lymphoid leukemia | Thyroid cancer | Chronic lymphoid leukemia | Hodgkin lymphoma | Mesothelioma | Chronic myeloid leukemia | Testicular cancer |
|-----------------|-------------------------------------|-------------------------|----------------|--------------|---------------|-------------------|-------------------|-----------------|---------------------------|-----------------|----------------------|-----------------------------------------|----------------|----------------------------|----------------|--------------------------------------|---------------|----------------|---------------|----------------------|------------------|------------------------|----------------|--------------------|--------------------------|-------------------------|-------------------------|----------------|---------------------------|------------------|--------------|--------------------------|-------------------|
| Global          | 1                                   | 2                       | 3              | 4            | 5             | 6                 | 7                 | 8               | 9                         | 10              | 11                   | 12                                      | 13             | 14                         | 15             | 16                                   | 17            | 18             | 19            | 20                   | 21               | 22                     | 23             | 24                 | 25                       | 26                      | 27                      | 28             | 29                        | 30               | 31           | 32                       | 33                |
| High SDI        | 1                                   | 2                       | 5              | 7            | 4             | 3                 | 10                | 6               | 11                        | 20              | 8                    | 13                                      | 9              | 19                         | 14             | 15                                   | 12            | 21             | 23            | 24                   | 16               | 17                     | 22             | 29                 | 27                       | 18                      | 31                      | 28             | 25                        | 32               | 26           | 30                       | 33                |
| High-middle SDI | 1                                   | 4                       | 2              | 3            | 6             | 7                 | 5                 | 9               | 8                         | 13              | 11                   | 10                                      | 12             | 18                         | 14             | 16                                   | 15            | 17             | 19            | 26                   | 20               | 23                     | 21             | 22                 | 24                       | 25                      | 27                      | 28             | 29                        | 30               | 31           | 32                       | 33                |
| Middle SDI      | 1                                   | 4                       | 3              | 2            | 6             | 9                 | 5                 | 7               | 8                         | 10              | 12                   | 11                                      | 17             | 13                         | 16             | 15                                   | 21            | 14             | 18            | 20                   | 24               | 25                     | 23             | 19                 | 22                       | 28                      | 26                      | 27             | 30                        | 29               | 32           | 31                       | 33                |
| Low-middle SDI  | 1                                   | 4                       | 3              | 5            | 2             | 12                | 10                | 7               | 6                         | 8               | 11                   | 14                                      | 19             | 9                          | 16             | 17                                   | 25            | 18             | 15            | 13                   | 22               | 20                     | 21             | 23                 | 27                       | 30                      | 26                      | 28             | 32                        | 24               | 31           | 29                       | 33                |
| Low SDI         | 1                                   | 4                       | 2              | 7            | 3             | 15                | 9                 | 8               | 6                         | 5               | 11                   | 13                                      | 19             | 10                         | 17             | 16                                   | 27            | 18             | 14            | 12                   | 21               | 20                     | 24             | 22                 | 26                       | 30                      | 23                      | 28             | 31                        | 25               | 32           | 29                       | 33                |
| South Asia      | 1                                   | 5                       | 3              | 10           | 2             | 16                | 8                 | 13              | 7                         | 9               | 14                   | 15                                      | 18             | 4                          | 17             | 12                                   | 28            | 20             | 11            | 6                    | 21               | 19                     | 23             | 22                 | 26                       | 30                      | 24                      | 25             | 33                        | 27               | 31           | 29                       | 32                |
| India           | 1                                   | 4                       | 2              | 10           | 3             | 12                | 9                 | 13              | 7                         | 8               | 16                   | 15                                      | 19             | 5                          | 17             | 14                                   | 25            | 20             | 11            | 6                    | 22               | 18                     | 23             | 21                 | 24                       | 31                      | 27                      | 26             | 32                        | 29               | 30           | 28                       | 33                |
| Pakistan        | 3                                   | 7                       | 11             | 9            | 1             | 20                | 5                 | 16              | 4                         | 18              | 6                    | 12                                      | 15             | 2                          | 8              | 13                                   | 27            | 22             | 10            | 14                   | 24               | 21                     | 17             | 26                 | 28                       | 30                      | 23                      | 25             | 33                        | 19               | 32           | 29                       | 31                |
| Bangladesh      | 1                                   | 2                       | 3              | 13           | 4             | 15                | 11                | 10              | 6                         | 8               | 16                   | 7                                       | 20             | 5                          | 18             | 14                                   | 25            | 19             | 12            | 9                    | 22               | 17                     | 26             | 23                 | 24                       | 30                      | 21                      | 27             | 31                        | 28               | 32           | 29                       | 33                |
| Nepal           | 1                                   | 4                       | 2              | 10           | 3             | 14                | 5                 | 12              | 8                         | 7               | 16                   | 15                                      | 19             | 6                          | 17             | 13                                   | 26            | 20             | 11            | 9                    | 21               | 18                     | 25             | 22                 | 24                       | 30                      | 23                      | 27             | 32                        | 28               | 31           | 29                       | 33                |
| Bhutan          | 1                                   | 2                       | 4              | 8            | 3             | 12                | 7                 | 10              | 6                         | 11              | 16                   | 13                                      | 19             | 5                          | 18             | 14                                   | 24            | 20             | 15            | 9                    | 21               | 17                     | 27             | 23                 | 25                       | 30                      | 22                      | 26             | 32                        | 28               | 31           | 29                       | 33                |
| East Asia       | 1                                   | 5                       | 3              | 2            | 6             | 7                 | 4                 | 10              | 8                         | 11              | 12                   | 9                                       | 14             | 18                         | 17             | 15                                   | 20            | 13             | 19            | 27                   | 22               | 25                     | 23             | 16                 | 21                       | 28                      | 24                      | 26             | 29                        | 31               | 30           | 32                       | 33                |
| China           | 1                                   | 5                       | 3              | 2            | 6             | 7                 | 4                 | 10              | 8                         | 11              | 12                   | 9                                       | 14             | 18                         | 17             | 15                                   | 20            | 13             | 19            | 27                   | 22               | 25                     | 23             | 16                 | 21                       | 28                      | 24                      | 26             | 29                        | 31               | 30           | 32                       | 33                |
| North Korea     | 2                                   | 4                       | 3              | 1            | 6             | 10                | 5                 | 9               | 8                         | 7               | 13                   | 11                                      | 14             | 20                         | 17             | 15                                   | 21            | 12             | 18            | 27                   | 25               | 24                     | 19             | 16                 | 22                       | 28                      | 23                      | 26             | 31                        | 29               | 30           | 32                       | 33                |
| Taiwan          | 1                                   | 3                       | 4              | 2            | 5             | 7                 | 6                 | 9               | 10                        | 16              | 11                   | 18                                      | 12             | 8                          | 19             | 17                                   | 14            | 22             | 24            | 13                   | 21               | 20                     | 23             | 15                 | 26                       | 27                      | 28                      | 25             | 29                        | 32               | 30           | 31                       | 33                |
| Southeast Asia  | 1                                   | 3                       | 5              | 2            | 4             | 9                 | 13                | 8               | 6                         | 7               | 11                   | 10                                      | 18             | 15                         | 14             | 16                                   | 23            | 12             | 19            | 24                   | 27               | 20                     | 22             | 17                 | 26                       | 30                      | 21                      | 25             | 32                        | 28               | 31           | 29                       | 33                |
| Indonesia       | 1                                   | 5                       | 4              | 3            | 2             | 9                 | 23                | 8               | 7                         | 6               | 12                   | 11                                      | 14             | 18                         | 13             | 17                                   | 21            | 10             | 16            | 25                   | 26               | 22                     | 19             | 15                 | 24                       | 30                      | 20                      | 27             | 32                        | 28               | 31           | 29                       | 33                |
| Philippines     | 1                                   | 3                       | 8              | 4            | 2             | 9                 | 21                | 6               | 5                         | 7               | 13                   | 11                                      | 23             | 14                         | 10             | 26                                   | 20            | 12             | 22            | 27                   | 24               | 16                     | 19             | 15                 | 25                       | 28                      | 17                      | 18             | 33                        | 30               | 31           | 29                       | 32                |
| Vietnam         | 1                                   | 3                       | 4              | 2            | 5             | 12                | 9                 | 13              | 6                         | 7               | 10                   | 11                                      | 22             | 8                          | 15             | 20                                   | 26            | 19             | 17            | 14                   | 27               | 18                     | 24             | 16                 | 25                       | 29                      | 23                      | 21             | 33                        | 28               | 30           | 31                       | 32                |

| Country                             | Tracheal, bronchus, and lung cancer | Colon and rectum cancer | Stomach cancer | Liver cancer | Breast cancer | Pancreatic cancer | Esophageal cancer | Prostate cancer | Other malignant neoplasms | Cervical cancer | Non-Hodgkin lymphoma | Brain and central nervous system cancer | Bladder cancer | Lip and oral cavity cancer | Ovarian cancer | Gallbladder and biliary tract cancer | Kidney cancer | Other leukemia | Larynx cancer | Other pharynx cancer | Multiple myeloma | Acute myeloid leukemia | Uterine cancer | Nasopharynx cancer | Non-melanoma skin cancer | Malignant skin melanoma | Acute lymphoid leukemia | Thyroid cancer | Chronic lymphoid leukemia | Hodgkin lymphoma | Mesothelioma | Chronic myeloid leukemia | Testicular cancer |
|-------------------------------------|-------------------------------------|-------------------------|----------------|--------------|---------------|-------------------|-------------------|-----------------|---------------------------|-----------------|----------------------|-----------------------------------------|----------------|----------------------------|----------------|--------------------------------------|---------------|----------------|---------------|----------------------|------------------|------------------------|----------------|--------------------|--------------------------|-------------------------|-------------------------|----------------|---------------------------|------------------|--------------|--------------------------|-------------------|
| Thailand                            | 2                                   | 3                       | 6              | 1            | 4             | 7                 | 11                | 9               | 10                        | 8               | 16                   | 13                                      | 17             | 12                         | 15             | 5                                    | 23            | 14             | 19            | 24                   | 25               | 20                     | 26             | 18                 | 21                       | 30                      | 22                      | 27             | 32                        | 31               | 29           | 28                       | 33                |
| Myanmar                             | 1                                   | 3                       | 5              | 4            | 2             | 11                | 6                 | 9               | 8                         | 7               | 12                   | 14                                      | 15             | 16                         | 13             | 18                                   | 21            | 10             | 20            | 25                   | 24               | 23                     | 19             | 17                 | 27                       | 30                      | 22                      | 26             | 32                        | 28               | 29           | 31                       | 33                |
| Malaysia                            | 1                                   | 2                       | 5              | 4            | 3             | 11                | 12                | 9               | 6                         | 7               | 10                   | 15                                      | 16             | 14                         | 13             | 22                                   | 20            | 23             | 19            | 24                   | 25               | 18                     | 21             | 8                  | 27                       | 29                      | 17                      | 26             | 31                        | 30               | 32           | 28                       | 33                |
| Sri Lanka                           | 1                                   | 3                       | 7              | 8            | 2             | 9                 | 6                 | 10              | 4                         | 16              | 12                   | 15                                      | 21             | 5                          | 17             | 14                                   | 11            | 13             | 25            | 18                   | 24               | 20                     | 26             | 23                 | 22                       | 30                      | 19                      | 27             | 32                        | 28               | 29           | 31                       | 33                |
| Cambodia                            | 1                                   | 2                       | 4              | 5            | 3             | 11                | 13                | 8               | 7                         | 6               | 10                   | 12                                      | 16             | 15                         | 14             | 19                                   | 23            | 9              | 18            | 24                   | 26               | 22                     | 20             | 17                 | 27                       | 30                      | 21                      | 25             | 32                        | 28               | 31           | 29                       | 33                |
| Laos                                | 1                                   | 3                       | 5              | 2            | 4             | 12                | 13                | 9               | 7                         | 6               | 10                   | 11                                      | 15             | 16                         | 14             | 19                                   | 23            | 8              | 18            | 24                   | 26               | 22                     | 21             | 17                 | 25                       | 29                      | 20                      | 27             | 32                        | 28               | 31           | 30                       | 33                |
| Timor-Leste                         | 1                                   | 4                       | 3              | 2            | 6             | 12                | 14                | 5               | 7                         | 8               | 10                   | 11                                      | 13             | 16                         | 15             | 18                                   | 24            | 9              | 19            | 27                   | 26               | 21                     | 22             | 17                 | 23                       | 29                      | 20                      | 25             | 32                        | 28               | 31           | 30                       | 33                |
| Mauritius                           | 1                                   | 3                       | 4              | 7            | 2             | 6                 | 12                | 5               | 8                         | 9               | 15                   | 17                                      | 14             | 11                         | 10             | 20                                   | 18            | 13             | 19            | 24                   | 21               | 23                     | 16             | 22                 | 26                       | 29                      | 27                      | 25             | 32                        | 28               | 31           | 30                       | 33                |
| Maldives                            | 1                                   | 2                       | 9              | 3            | 4             | 8                 | 16                | 6               | 7                         | 12              | 11                   | 14                                      | 10             | 5                          | 13             | 20                                   | 18            | 15             | 22            | 30                   | 21               | 23                     | 29             | 26                 | 25                       | 27                      | 19                      | 17             | 31                        | 32               | 24           | 28                       | 33                |
| Seychelles                          | 3                                   | 1                       | 9              | 7            | 4             | 8                 | 10                | 2               | 17                        | 5               | 11                   | 13                                      | 15             | 6                          | 14             | 23                                   | 21            | 18             | 12            | 16                   | 19               | 24                     | 25             | 20                 | 29                       | 28                      | 22                      | 31             | 27                        | 30               | 32           | 26                       | 33                |
| <b>North Africa and Middle East</b> | <b>1</b>                            | <b>3</b>                | <b>2</b>       | <b>5</b>     | <b>4</b>      | <b>8</b>          | <b>13</b>         | <b>9</b>        | <b>6</b>                  | <b>16</b>       | <b>12</b>            | <b>7</b>                                | <b>11</b>      | <b>22</b>                  | <b>14</b>      | <b>18</b>                            | <b>20</b>     | <b>10</b>      | <b>15</b>     | <b>30</b>            | <b>19</b>        | <b>17</b>              | <b>24</b>      | <b>25</b>          | <b>29</b>                | <b>27</b>               | <b>21</b>               | <b>26</b>      | <b>32</b>                 | <b>23</b>        | <b>28</b>    | <b>31</b>                | <b>33</b>         |
| Egypt                               | 2                                   | 6                       | 9              | 1            | 3             | 10                | 14                | 12              | 5                         | 20              | 11                   | 8                                       | 4              | 21                         | 13             | 16                                   | 17            | 7              | 18            | 26                   | 19               | 23                     | 22             | 31                 | 28                       | 29                      | 24                      | 25             | 32                        | 15               | 27           | 30                       | 33                |
| Iran                                | 2                                   | 3                       | 1              | 10           | 4             | 9                 | 7                 | 5               | 8                         | 19              | 13                   | 6                                       | 12             | 23                         | 15             | 18                                   | 17            | 11             | 14            | 31                   | 20               | 16                     | 25             | 32                 | 26                       | 24                      | 21                      | 28             | 29                        | 27               | 22           | 30                       | 33                |
| Turkey                              | 1                                   | 2                       | 3              | 8            | 5             | 4                 | 18                | 7               | 10                        | 22              | 11                   | 6                                       | 9              | 26                         | 13             | 19                                   | 17            | 16             | 15            | 32                   | 12               | 14                     | 21             | 28                 | 25                       | 20                      | 23                      | 29             | 27                        | 30               | 24           | 31                       | 33                |
| Iraq                                | 1                                   | 4                       | 8              | 7            | 2             | 10                | 20                | 11              | 5                         | 18              | 12                   | 3                                       | 9              | 22                         | 14             | 23                                   | 16            | 6              | 13            | 26                   | 21               | 15                     | 19             | 30                 | 27                       | 31                      | 17                      | 24             | 32                        | 25               | 29           | 28                       | 33                |
| Algeria                             | 1                                   | 3                       | 5              | 11           | 2             | 9                 | 20                | 8               | 4                         | 10              | 6                    | 12                                      | 13             | 22                         | 19             | 7                                    | 24            | 18             | 15            | 23                   | 17               | 16                     | 28             | 14                 | 29                       | 30                      | 27                      | 25             | 31                        | 21               | 32           | 26                       | 33                |
| Sudan                               | 2                                   | 3                       | 1              | 10           | 4             | 13                | 7                 | 9               | 5                         | 17              | 12                   | 8                                       | 11             | 21                         | 19             | 18                                   | 20            | 6              | 14            | 30                   | 23               | 15                     | 29             | 25                 | 28                       | 26                      | 16                      | 24             | 31                        | 22               | 32           | 27                       | 33                |
| Morocco                             | 1                                   | 3                       | 6              | 13           | 2             | 9                 | 17                | 7               | 4                         | 8               | 5                    | 10                                      | 14             | 19                         | 12             | 20                                   | 24            | 16             | 11            | 26                   | 21               | 25                     | 22             | 15                 | 29                       | 27                      | 28                      | 23             | 32                        | 18               | 30           | 31                       | 33                |
| Saudi Arabia                        | 2                                   | 1                       | 7              | 3            | 4             | 9                 | 12                | 11              | 6                         | 24              | 5                    | 10                                      | 14             | 15                         | 17             | 13                                   | 16            | 8              | 23            | 27                   | 18               | 20                     | 26             | 19                 | 29                       | 30                      | 25                      | 21             | 31                        | 22               | 33           | 28                       | 32                |
| Afghanistan                         | 4                                   | 3                       | 1              | 10           | 2             | 18                | 8                 | 12              | 7                         | 9               | 11                   | 6                                       | 16             | 22                         | 20             | 19                                   | 21            | 5              | 13            | 30                   | 24               | 14                     | 27             | 25                 | 31                       | 29                      | 15                      | 26             | 32                        | 17               | 28           | 23                       | 33                |
| Yemen                               | 2                                   | 3                       | 1              | 10           | 4             | 15                | 8                 | 9               | 5                         | 14              | 12                   | 7                                       | 11             | 21                         | 19             | 18                                   | 22            | 6              | 13            | 30                   | 23               | 16                     | 28             | 26                 | 29                       | 27                      | 17                      | 25             | 31                        | 20               | 32           | 24                       | 33                |



| Country                     | Tracheal, bronchus, and lung cancer | Colon and rectum cancer | Stomach cancer | Liver cancer | Breast cancer | Pancreatic cancer | Esophageal cancer | Prostate cancer | Other malignant neoplasms | Cervical cancer | Non-Hodgkin lymphoma | Brain and central nervous system cancer | Bladder cancer | Lip and oral cavity cancer | Ovarian cancer | Gallbladder and biliary tract cancer | Kidney cancer | Other leukemia | Larynx cancer | Other pharynx cancer | Multiple myeloma | Acute myeloid leukemia | Uterine cancer | Nasopharynx cancer | Non-melanoma skin cancer | Malignant skin melanoma | Acute lymphoid leukemia | Thyroid cancer | Chronic lymphoid leukemia | Hodgkin lymphoma | Mesothelioma | Chronic myeloid leukemia | Testicular cancer |
|-----------------------------|-------------------------------------|-------------------------|----------------|--------------|---------------|-------------------|-------------------|-----------------|---------------------------|-----------------|----------------------|-----------------------------------------|----------------|----------------------------|----------------|--------------------------------------|---------------|----------------|---------------|----------------------|------------------|------------------------|----------------|--------------------|--------------------------|-------------------------|-------------------------|----------------|---------------------------|------------------|--------------|--------------------------|-------------------|
| Syria                       | 2                                   | 3                       | 7              | 8            | 4             | 9                 | 16                | 6               | 10                        | 17              | 12                   | 5                                       | 13             | 22                         | 15             | 21                                   | 18            | 1              | 19            | 27                   | 20               | 11                     | 25             | 30                 | 26                       | 29                      | 14                      | 28             | 23                        | 32               | 31           | 24                       | 33                |
| Tunisia                     | 1                                   | 2                       | 4              | 14           | 3             | 9                 | 20                | 8               | 5                         | 18              | 7                    | 13                                      | 6              | 19                         | 15             | 12                                   | 21            | 10             | 11            | 25                   | 16               | 24                     | 23             | 17                 | 27                       | 28                      | 29                      | 26             | 31                        | 22               | 32           | 30                       | 33                |
| Jordan                      | 1                                   | 2                       | 7              | 11           | 3             | 8                 | 18                | 9               | 6                         | 19              | 5                    | 10                                      | 12             | 15                         | 13             | 14                                   | 17            | 4              | 21            | 27                   | 16               | 24                     | 20             | 22                 | 25                       | 28                      | 26                      | 23             | 33                        | 31               | 29           | 32                       | 30                |
| <b>United Arab Emirates</b> | <b>2</b>                            | <b>4</b>                | <b>8</b>       | <b>9</b>     | <b>6</b>      | <b>7</b>          | <b>5</b>          | <b>16</b>       | <b>1</b>                  | <b>18</b>       | <b>10</b>            | <b>3</b>                                | <b>12</b>      | <b>17</b>                  | <b>20</b>      | <b>21</b>                            | <b>14</b>     | <b>13</b>      | <b>11</b>     | <b>25</b>            | <b>19</b>        | <b>15</b>              | <b>32</b>      | <b>24</b>          | <b>29</b>                | <b>27</b>               | <b>22</b>               | <b>26</b>      | <b>31</b>                 | <b>23</b>        | <b>30</b>    | <b>28</b>                | <b>33</b>         |
| Lebanon                     | 1                                   | 3                       | 8              | 13           | 2             | 9                 | 21                | 11              | 5                         | 17              | 4                    | 10                                      | 6              | 22                         | 12             | 15                                   | 18            | 7              | 16            | 28                   | 14               | 23                     | 20             | 27                 | 29                       | 26                      | 25                      | 24             | 31                        | 19               | 33           | 30                       | 32                |
| Libya                       | 1                                   | 2                       | 8              | 9            | 3             | 6                 | 20                | 12              | 4                         | 16              | 7                    | 5                                       | 11             | 23                         | 15             | 14                                   | 21            | 10             | 13            | 28                   | 19               | 22                     | 24             | 17                 | 27                       | 30                      | 25                      | 26             | 32                        | 18               | 29           | 31                       | 33                |
| Palestine                   | 1                                   | 2                       | 7              | 6            | 3             | 8                 | 18                | 9               | 10                        | 17              | 11                   | 4                                       | 12             | 22                         | 13             | 20                                   | 15            | 5              | 21            | 28                   | 16               | 19                     | 14             | 27                 | 26                       | 31                      | 24                      | 25             | 29                        | 23               | 32           | 30                       | 33                |
| Oman                        | 2                                   | 3                       | 1              | 6            | 5             | 9                 | 12                | 11              | 7                         | 16              | 4                    | 10                                      | 14             | 15                         | 17             | 20                                   | 18            | 8              | 22            | 27                   | 13               | 19                     | 29             | 28                 | 25                       | 30                      | 23                      | 24             | 32                        | 21               | 26           | 31                       | 33                |
| Kuwait                      | 1                                   | 2                       | 11             | 4            | 3             | 5                 | 13                | 7               | 8                         | 19              | 6                    | 9                                       | 12             | 21                         | 15             | 18                                   | 14            | 10             | 22            | 26                   | 17               | 16                     | 20             | 25                 | 27                       | 32                      | 23                      | 24             | 29                        | 30               | 28           | 31                       | 33                |
| Qatar                       | 1                                   | 4                       | 7              | 3            | 2             | 8                 | 13                | 10              | 6                         | 22              | 9                    | 5                                       | 15             | 20                         | 14             | 21                                   | 16            | 12             | 19            | 24                   | 18               | 11                     | 23             | 30                 | 25                       | 31                      | 17                      | 26             | 28                        | 29               | 32           | 27                       | 33                |
| Bahrain                     | 1                                   | 3                       | 5              | 7            | 2             | 4                 | 17                | 9               | 6                         | 18              | 8                    | 10                                      | 11             | 19                         | 12             | 21                                   | 14            | 13             | 22            | 28                   | 16               | 15                     | 20             | 26                 | 29                       | 32                      | 23                      | 25             | 30                        | 24               | 27           | 31                       | 33                |
| <b>Western SSA</b>          | <b>6</b>                            | <b>8</b>                | <b>7</b>       | <b>3</b>     | <b>2</b>      | <b>10</b>         | <b>11</b>         | <b>1</b>        | <b>5</b>                  | <b>4</b>        | <b>9</b>             | <b>12</b>                               | <b>13</b>      | <b>19</b>                  | <b>14</b>      | <b>21</b>                            | <b>22</b>     | <b>16</b>      | <b>20</b>     | <b>29</b>            | <b>18</b>        | <b>17</b>              | <b>23</b>      | <b>26</b>          | <b>27</b>                | <b>25</b>               | <b>24</b>               | <b>31</b>      | <b>30</b>                 | <b>15</b>        | <b>32</b>    | <b>28</b>                | <b>33</b>         |
| Nigeria                     | 6                                   | 5                       | 9              | 10           | 2             | 8                 | 11                | 1               | 3                         | 4               | 7                    | 13                                      | 21             | 22                         | 14             | 19                                   | 20            | 15             | 18            | 31                   | 17               | 16                     | 25             | 24                 | 27                       | 23                      | 26                      | 30             | 29                        | 12               | 32           | 28                       | 33                |
| Ghana                       | 8                                   | 6                       | 7              | 1            | 2             | 5                 | 12                | 4               | 10                        | 3               | 9                    | 11                                      | 13             | 16                         | 15             | 21                                   | 22            | 20             | 18            | 23                   | 19               | 17                     | 14             | 31                 | 26                       | 28                      | 24                      | 30             | 27                        | 32               | 29           | 25                       | 33                |
| Cameroon                    | 5                                   | 7                       | 3              | 1            | 6             | 10                | 9                 | 2               | 8                         | 4               | 11                   | 12                                      | 13             | 16                         | 15             | 22                                   | 18            | 17             | 19            | 24                   | 20               | 14                     | 21             | 28                 | 27                       | 29                      | 23                      | 31             | 30                        | 25               | 32           | 26                       | 33                |
| Cote d'Ivoire               | 5                                   | 9                       | 7              | 3            | 2             | 10                | 19                | 1               | 8                         | 6               | 4                    | 16                                      | 11             | 14                         | 12             | 18                                   | 23            | 20             | 17            | 25                   | 13               | 15                     | 21             | 22                 | 26                       | 29                      | 27                      | 30             | 31                        | 24               | 32           | 28                       | 33                |
| Niger                       | 5                                   | 8                       | 3              | 1            | 7             | 11                | 9                 | 4               | 6                         | 2               | 10                   | 13                                      | 15             | 16                         | 17             | 19                                   | 22            | 12             | 20            | 28                   | 21               | 14                     | 18             | 27                 | 26                       | 29                      | 23                      | 31             | 30                        | 24               | 32           | 25                       | 33                |
| Burkina Faso                | 7                                   | 5                       | 4              | 1            | 3             | 12                | 9                 | 6               | 8                         | 2               | 11                   | 10                                      | 14             | 19                         | 16             | 20                                   | 22            | 13             | 17            | 26                   | 21               | 15                     | 18             | 28                 | 27                       | 29                      | 23                      | 31             | 30                        | 24               | 32           | 25                       | 33                |
| Mali                        | 8                                   | 7                       | 2              | 1            | 4             | 11                | 12                | 9               | 3                         | 5               | 10                   | 16                                      | 6              | 15                         | 21             | 20                                   | 19            | 13             | 22            | 30                   | 17               | 14                     | 24             | 27                 | 28                       | 23                      | 25                      | 26             | 31                        | 18               | 33           | 29                       | 32                |
| Chad                        | 5                                   | 8                       | 3              | 1            | 6             | 11                | 9                 | 4               | 7                         | 2               | 10                   | 13                                      | 14             | 16                         | 19             | 18                                   | 21            | 12             | 17            | 26                   | 22               | 15                     | 20             | 28                 | 27                       | 29                      | 23                      | 31             | 30                        | 24               | 32           | 25                       | 33                |
| Senegal                     | 5                                   | 7                       | 3              | 2            | 6             | 10                | 9                 | 1               | 8                         | 4               | 11                   | 13                                      | 12             | 17                         | 16             | 19                                   | 22            | 14             | 18            | 27                   | 21               | 15                     | 20             | 29                 | 24                       | 28                      | 23                      | 31             | 30                        | 26               | 32           | 25                       | 33                |
| Guinea                      | 5                                   | 8                       | 3              | 1            | 4             | 12                | 13                | 6               | 7                         | 2               | 11                   | 17                                      | 10             | 9                          | 14             | 18                                   | 23            | 21             | 16            | 19                   | 25               | 20                     | 15             | 26                 | 27                       | 22                      | 29                      | 30             | 31                        | 24               | 33           | 28                       | 32                |

| Country               | Tracheal, bronchus, and lung cancer | Colon and rectum cancer | Stomach cancer | Liver cancer | Breast cancer | Pancreatic cancer | Esophageal cancer | Prostate cancer | Other malignant neoplasms | Cervical cancer | Non-Hodgkin lymphoma | Brain and central nervous system cancer | Bladder cancer | Lip and oral cavity cancer | Ovarian cancer | Gallbladder and biliary tract cancer | Kidney cancer | Other leukemia | Larynx cancer | Other pharynx cancer | Multiple myeloma | Acute myeloid leukemia | Uterine cancer | Nasopharynx cancer | Non-melanoma skin cancer | Malignant skin melanoma | Acute lymphoid leukemia | Thyroid cancer | Chronic lymphoid leukemia | Hodgkin lymphoma | Mesothelioma | Chronic myeloid leukemia | Testicular cancer |
|-----------------------|-------------------------------------|-------------------------|----------------|--------------|---------------|-------------------|-------------------|-----------------|---------------------------|-----------------|----------------------|-----------------------------------------|----------------|----------------------------|----------------|--------------------------------------|---------------|----------------|---------------|----------------------|------------------|------------------------|----------------|--------------------|--------------------------|-------------------------|-------------------------|----------------|---------------------------|------------------|--------------|--------------------------|-------------------|
| Benin                 | 6                                   | 8                       | 4              | 1            | 5             | 10                | 9                 | 3               | 7                         | 2               | 11                   | 12                                      | 13             | 17                         | 16             | 22                                   | 18            | 15             | 21            | 27                   | 20               | 14                     | 19             | 28                 | 26                       | 29                      | 23                      | 31             | 30                        | 24               | 32           | 25                       | 33                |
| Sierra Leone          | 6                                   | 7                       | 3              | 1            | 5             | 11                | 9                 | 4               | 8                         | 2               | 10                   | 13                                      | 12             | 17                         | 16             | 20                                   | 22            | 14             | 18            | 25                   | 21               | 15                     | 19             | 28                 | 27                       | 29                      | 23                      | 31             | 30                        | 26               | 32           | 24                       | 33                |
| Togo                  | 6                                   | 7                       | 3              | 1            | 4             | 10                | 9                 | 5               | 8                         | 2               | 11                   | 12                                      | 13             | 16                         | 14             | 21                                   | 22            | 15             | 19            | 26                   | 20               | 17                     | 18             | 27                 | 28                       | 29                      | 23                      | 31             | 30                        | 25               | 32           | 24                       | 33                |
| Liberia               | 7                                   | 6                       | 4              | 1            | 5             | 10                | 8                 | 3               | 9                         | 2               | 11                   | 13                                      | 12             | 17                         | 16             | 22                                   | 19            | 14             | 21            | 27                   | 18               | 15                     | 20             | 28                 | 26                       | 29                      | 23                      | 31             | 30                        | 25               | 32           | 24                       | 33                |
| Mauritania            | 6                                   | 7                       | 5              | 2            | 4             | 10                | 9                 | 1               | 8                         | 3               | 11                   | 13                                      | 12             | 16                         | 14             | 21                                   | 20            | 17             | 22            | 27                   | 18               | 15                     | 19             | 30                 | 24                       | 26                      | 23                      | 31             | 28                        | 29               | 32           | 25                       | 33                |
| The Gambia            | 3                                   | 6                       | 8              | 1            | 4             | 10                | 11                | 9               | 5                         | 2               | 7                    | 18                                      | 12             | 14                         | 15             | 16                                   | 20            | 17             | 22            | 28                   | 21               | 13                     | 19             | 26                 | 24                       | 31                      | 25                      | 30             | 29                        | 23               | 32           | 27                       | 33                |
| Guinea-Bissau         | 5                                   | 6                       | 3              | 1            | 4             | 11                | 8                 | 7               | 9                         | 2               | 10                   | 12                                      | 13             | 17                         | 16             | 22                                   | 20            | 14             | 19            | 26                   | 21               | 15                     | 18             | 27                 | 28                       | 29                      | 23                      | 30             | 32                        | 24               | 31           | 25                       | 33                |
| Cape Verde            | 3                                   | 6                       | 1              | 5            | 8             | 7                 | 4                 | 2               | 10                        | 9               | 13                   | 11                                      | 14             | 12                         | 18             | 23                                   | 16            | 17             | 22            | 21                   | 20               | 19                     | 15             | 27                 | 26                       | 29                      | 24                      | 30             | 28                        | 31               | 32           | 25                       | 33                |
| Sao Tome and Principe | 3                                   | 5                       | 2              | 13           | 6             | 12                | 9                 | 7               | 1                         | 4               | 10                   | 19                                      | 8              | 22                         | 11             | 15                                   | 20            | 17             | 21            | 24                   | 18               | 16                     | 14             | 30                 | 29                       | 28                      | 23                      | 26             | 27                        | 32               | 31           | 25                       | 33                |
| <b>Western Europe</b> | <b>1</b>                            | <b>2</b>                | <b>6</b>       | <b>7</b>     | <b>3</b>      | <b>4</b>          | <b>12</b>         | <b>5</b>        | <b>9</b>                  | <b>21</b>       | <b>10</b>            | <b>13</b>                               | <b>8</b>       | <b>20</b>                  | <b>14</b>      | <b>16</b>                            | <b>11</b>     | <b>19</b>      | <b>25</b>     | <b>26</b>            | <b>15</b>        | <b>17</b>              | <b>22</b>      | <b>29</b>          | <b>27</b>                | <b>18</b>               | <b>31</b>               | <b>30</b>      | <b>24</b>                 | <b>32</b>        | <b>23</b>    | <b>28</b>                | <b>33</b>         |
| Germany               | 1                                   | 2                       | 6              | 7            | 3             | 4                 | 14                | 5               | 8                         | 21              | 11                   | 13                                      | 9              | 19                         | 12             | 15                                   | 10            | 23             | 25            | 20                   | 16               | 17                     | 24             | 30                 | 27                       | 18                      | 31                      | 29             | 22                        | 32               | 26           | 28                       | 33                |
| United Kingdom        | 1                                   | 2                       | 7              | 11           | 3             | 5                 | 6                 | 4               | 13                        | 22              | 9                    | 14                                      | 8              | 21                         | 10             | 19                                   | 12            | 25             | 27            | 26                   | 16               | 15                     | 20             | 28                 | 24                       | 18                      | 32                      | 30             | 23                        | 31               | 17           | 29                       | 33                |
| France                | 1                                   | 2                       | 7              | 6            | 3             | 4                 | 12                | 5               | 9                         | 22              | 10                   | 14                                      | 8              | 18                         | 13             | 19                                   | 11            | 16             | 24            | 21                   | 15               | 17                     | 23             | 29                 | 27                       | 20                      | 31                      | 30             | 26                        | 32               | 25           | 28                       | 33                |
| Italy                 | 1                                   | 2                       | 5              | 6            | 3             | 4                 | 17                | 7               | 10                        | 22              | 9                    | 13                                      | 8              | 20                         | 14             | 12                                   | 11            | 18             | 24            | 27                   | 15               | 16                     | 23             | 29                 | 26                       | 19                      | 31                      | 30             | 25                        | 32               | 21           | 28                       | 33                |
| England               | 1                                   | 2                       | 7              | 11           | 3             | 5                 | 6                 | 4               | 13                        | 21              | 9                    | 14                                      | 8              | 22                         | 10             | 19                                   | 12            | 25             | 27            | 26                   | 16               | 15                     | 20             | 28                 | 24                       | 18                      | 32                      | 30             | 23                        | 31               | 17           | 29                       | 33                |
| Spain                 | 1                                   | 2                       | 4              | 8            | 6             | 5                 | 15                | 3               | 9                         | 22              | 10                   | 11                                      | 7              | 19                         | 13             | 16                                   | 12            | 17             | 18            | 25                   | 14               | 20                     | 21             | 28                 | 24                       | 23                      | 31                      | 29             | 26                        | 32               | 27           | 30                       | 33                |
| Netherlands           | 1                                   | 2                       | 6              | 13           | 3             | 4                 | 7                 | 5               | 10                        | 23              | 9                    | 14                                      | 8              | 22                         | 12             | 18                                   | 11            | 16             | 24            | 25                   | 15               | 19                     | 21             | 27                 | 26                       | 17                      | 30                      | 28             | 31                        | 32               | 20           | 29                       | 33                |
| Belgium               | 1                                   | 2                       | 6              | 9            | 3             | 5                 | 11                | 4               | 8                         | 21              | 10                   | 14                                      | 7              | 18                         | 13             | 20                                   | 12            | 16             | 25            | 24                   | 15               | 17                     | 22             | 29                 | 27                       | 19                      | 31                      | 30             | 26                        | 32               | 23           | 28                       | 33                |
| Portugal              | 2                                   | 1                       | 3              | 7            | 5             | 6                 | 12                | 4               | 11                        | 19              | 10                   | 9                                       | 8              | 17                         | 14             | 16                                   | 15            | 22             | 18            | 24                   | 13               | 20                     | 21             | 27                 | 26                       | 23                      | 31                      | 28             | 25                        | 32               | 30           | 29                       | 33                |
| Greece                | 1                                   | 2                       | 6              | 7            | 3             | 5                 | 21                | 4               | 10                        | 19              | 16                   | 9                                       | 8              | 25                         | 12             | 14                                   | 11            | 13             | 18            | 32                   | 17               | 15                     | 20             | 27                 | 24                       | 22                      | 31                      | 29             | 23                        | 26               | 30           | 28                       | 33                |
| Sweden                | 1                                   | 2                       | 7              | 10           | 4             | 5                 | 16                | 3               | 11                        | 19              | 8                    | 13                                      | 6              | 22                         | 14             | 17                                   | 9             | 23             | 29            | 25                   | 15               | 18                     | 20             | 31                 | 26                       | 12                      | 30                      | 27             | 21                        | 32               | 24           | 28                       | 33                |

| Country            | Tracheal, bronchus, and lung cancer | Colon and rectum cancer | Stomach cancer | Liver cancer | Breast cancer | Pancreatic cancer | Esophageal cancer | Prostate cancer | Other malignant neoplasms | Cervical cancer | Non-Hodgkin lymphoma | Brain and central nervous system cancer | Bladder cancer | Lip and oral cavity cancer | Ovarian cancer | Gallbladder and biliary tract cancer | Kidney cancer | Other leukemia | Larynx cancer | Other pharynx cancer | Multiple myeloma | Acute myeloid leukemia | Uterine cancer | Nasopharynx cancer | Non-melanoma skin cancer | Malignant skin melanoma | Acute lymphoid leukemia | Thyroid cancer | Chronic lymphoid leukemia | Hodgkin lymphoma | Mesothelioma | Chronic myeloid leukemia | Testicular cancer |
|--------------------|-------------------------------------|-------------------------|----------------|--------------|---------------|-------------------|-------------------|-----------------|---------------------------|-----------------|----------------------|-----------------------------------------|----------------|----------------------------|----------------|--------------------------------------|---------------|----------------|---------------|----------------------|------------------|------------------------|----------------|--------------------|--------------------------|-------------------------|-------------------------|----------------|---------------------------|------------------|--------------|--------------------------|-------------------|
| Israel             | 1                                   | 2                       | 5              | 11           | 3             | 4                 | 18                | 6               | 10                        | 20              | 7                    | 8                                       | 9              | 24                         | 12             | 21                                   | 13            | 23             | 25            | 32                   | 14               | 15                     | 19             | 31                 | 22                       | 16                      | 27                      | 26             | 17                        | 30               | 28           | 29                       | 33                |
| Austria            | 1                                   | 2                       | 6              | 7            | 4             | 3                 | 17                | 5               | 8                         | 20              | 9                    | 13                                      | 10             | 19                         | 12             | 14                                   | 11            | 24             | 26            | 22                   | 15               | 16                     | 23             | 30                 | 25                       | 18                      | 31                      | 29             | 21                        | 32               | 27           | 28                       | 33                |
| Switzerland        | 1                                   | 2                       | 7              | 6            | 4             | 5                 | 11                | 3               | 10                        | 21              | 8                    | 13                                      | 9              | 20                         | 12             | 17                                   | 14            | 19             | 27            | 25                   | 15               | 18                     | 24             | 29                 | 26                       | 16                      | 32                      | 28             | 23                        | 31               | 22           | 30                       | 33                |
| Denmark            | 1                                   | 2                       | 7              | 12           | 4             | 5                 | 11                | 3               | 9                         | 21              | 13                   | 8                                       | 6              | 20                         | 10             | 18                                   | 14            | 22             | 27            | 23                   | 16               | 17                     | 24             | 29                 | 26                       | 15                      | 31                      | 30             | 19                        | 32               | 25           | 28                       | 33                |
| Finland            | 1                                   | 2                       | 6              | 8            | 5             | 3                 | 15                | 4               | 9                         | 22              | 7                    | 12                                      | 13             | 20                         | 11             | 16                                   | 10            | 24             | 28            | 25                   | 14               | 18                     | 19             | 32                 | 26                       | 17                      | 29                      | 27             | 21                        | 31               | 23           | 30                       | 33                |
| Scotland           | 1                                   | 2                       | 7              | 9            | 3             | 5                 | 6                 | 4               | 11                        | 22              | 10                   | 14                                      | 8              | 20                         | 12             | 19                                   | 13            | 25             | 27            | 26                   | 15               | 16                     | 21             | 28                 | 24                       | 17                      | 30                      | 31             | 23                        | 32               | 18           | 29                       | 33                |
| Norway             | 1                                   | 2                       | 6              | 15           | 5             | 4                 | 16                | 3               | 11                        | 21              | 9                    | 10                                      | 7              | 22                         | 13             | 18                                   | 8             | 19             | 28            | 26                   | 12               | 17                     | 20             | 31                 | 25                       | 14                      | 29                      | 27             | 23                        | 32               | 24           | 30                       | 33                |
| Ireland            | 1                                   | 2                       | 6              | 11           | 3             | 5                 | 7                 | 4               | 12                        | 20              | 8                    | 10                                      | 14             | 21                         | 9              | 18                                   | 13            | 19             | 25            | 26                   | 15               | 17                     | 24             | 28                 | 22                       | 16                      | 31                      | 30             | 23                        | 32               | 27           | 29                       | 33                |
| Wales              | 1                                   | 2                       | 7              | 10           | 3             | 5                 | 6                 | 4               | 13                        | 22              | 9                    | 14                                      | 8              | 21                         | 11             | 20                                   | 12            | 26             | 27            | 25                   | 16               | 15                     | 19             | 28                 | 24                       | 17                      | 32                      | 30             | 23                        | 31               | 18           | 29                       | 33                |
| Northern Ireland   | 1                                   | 2                       | 6              | 11           | 3             | 5                 | 7                 | 4               | 13                        | 20              | 9                    | 12                                      | 8              | 21                         | 10             | 19                                   | 14            | 25             | 26            | 27                   | 15               | 16                     | 22             | 28                 | 24                       | 17                      | 31                      | 30             | 23                        | 32               | 18           | 29                       | 33                |
| Cyprus             | 1                                   | 2                       | 6              | 8            | 3             | 5                 | 22                | 4               | 10                        | 21              | 9                    | 11                                      | 7              | 23                         | 12             | 16                                   | 17            | 15             | 25            | 31                   | 13               | 14                     | 19             | 29                 | 24                       | 18                      | 27                      | 28             | 20                        | 30               | 26           | 32                       | 33                |
| Luxembourg         | 1                                   | 2                       | 6              | 7            | 3             | 4                 | 13                | 5               | 10                        | 22              | 12                   | 8                                       | 9              | 20                         | 11             | 21                                   | 18            | 16             | 25            | 23                   | 14               | 15                     | 19             | 29                 | 27                       | 17                      | 31                      | 28             | 24                        | 32               | 26           | 30                       | 33                |
| Malta              | 1                                   | 2                       | 5              | 13           | 3             | 4                 | 15                | 6               | 10                        | 23              | 8                    | 11                                      | 7              | 18                         | 9              | 19                                   | 12            | 27             | 22            | 29                   | 16               | 14                     | 17             | 24                 | 25                       | 20                      | 32                      | 28             | 26                        | 31               | 21           | 30                       | 33                |
| Iceland            | 1                                   | 2                       | 7              | 14           | 5             | 4                 | 11                | 3               | 9                         | 22              | 12                   | 8                                       | 10             | 20                         | 15             | 19                                   | 6             | 16             | 27            | 30                   | 13               | 18                     | 24             | 31                 | 29                       | 17                      | 28                      | 21             | 25                        | 32               | 23           | 26                       | 33                |
| Andorra            | 1                                   | 2                       | 6              | 13           | 4             | 5                 | 12                | 3               | 9                         | 22              | 8                    | 10                                      | 7              | 20                         | 11             | 19                                   | 14            | 23             | 26            | 27                   | 15               | 16                     | 24             | 29                 | 25                       | 18                      | 31                      | 30             | 21                        | 32               | 17           | 28                       | 33                |
| <b>Eastern SSA</b> | <b>9</b>                            | <b>4</b>                | <b>10</b>      | <b>5</b>     | <b>3</b>      | <b>12</b>         | <b>6</b>          | <b>7</b>        | <b>1</b>                  | <b>2</b>        | <b>8</b>             | <b>11</b>                               | <b>15</b>      | <b>14</b>                  | <b>13</b>      | <b>22</b>                            | <b>26</b>     | <b>17</b>      | <b>21</b>     | <b>29</b>            | <b>20</b>        | <b>16</b>              | <b>24</b>      | <b>23</b>          | <b>25</b>                | <b>30</b>               | <b>18</b>               | <b>27</b>      | <b>31</b>                 | <b>19</b>        | <b>32</b>    | <b>28</b>                | <b>33</b>         |
| Ethiopia           | 4                                   | 1                       | 7              | 11           | 2             | 13                | 10                | 9               | 5                         | 3               | 6                    | 8                                       | 19             | 14                         | 12             | 21                                   | 26            | 23             | 27            | 30                   | 24               | 17                     | 29             | 25                 | 22                       | 31                      | 15                      | 20             | 28                        | 18               | 32           | 16                       | 33                |
| Tanzania           | 7                                   | 5                       | 9              | 8            | 4             | 12                | 10                | 3               | 1                         | 2               | 6                    | 11                                      | 14             | 20                         | 13             | 26                                   | 25            | 15             | 19            | 28                   | 17               | 16                     | 21             | 24                 | 22                       | 27                      | 18                      | 29             | 31                        | 23               | 32           | 30                       | 33                |
| Kenya              | 9                                   | 5                       | 2              | 8            | 3             | 11                | 4                 | 7               | 1                         | 6               | 10                   | 12                                      | 24             | 13                         | 14             | 18                                   | 27            | 21             | 16            | 22                   | 15               | 19                     | 26             | 17                 | 20                       | 28                      | 23                      | 30             | 29                        | 25               | 32           | 31                       | 33                |
| Uganda             | 9                                   | 8                       | 10             | 7            | 5             | 11                | 3                 | 2               | 1                         | 6               | 4                    | 13                                      | 17             | 12                         | 14             | 29                                   | 27            | 22             | 23            | 20                   | 15               | 21                     | 18             | 16                 | 26                       | 24                      | 25                      | 28             | 31                        | 19               | 33           | 30                       | 32                |
| Mozambique         | 5                                   | 3                       | 7              | 1            | 4             | 14                | 6                 | 11              | 8                         | 2               | 10                   | 9                                       | 19             | 16                         | 13             | 24                                   | 26            | 12             | 18            | 28                   | 21               | 15                     | 22             | 32                 | 23                       | 25                      | 17                      | 27             | 30                        | 20               | 31           | 29                       | 33                |
| Madagascar         | 8                                   | 4                       | 6              | 10           | 3             | 13                | 5                 | 7               | 2                         | 1               | 9                    | 11                                      | 16             | 14                         | 12             | 26                                   | 28            | 15             | 18            | 27                   | 22               | 17                     | 20             | 21                 | 24                       | 25                      | 23                      | 29             | 31                        | 19               | 32           | 30                       | 33                |

| Country                          | Tracheal, bronchus, and lung cancer | Colon and rectum cancer | Stomach cancer | Liver cancer | Breast cancer | Pancreatic cancer | Esophageal cancer | Prostate cancer | Other malignant neoplasms | Cervical cancer | Non-Hodgkin lymphoma | Brain and central nervous system cancer | Bladder cancer | Lip and oral cavity cancer | Ovarian cancer | Gallbladder and biliary tract cancer | Kidney cancer | Other leukemia | Larynx cancer | Other pharynx cancer | Multiple myeloma | Acute myeloid leukemia | Uterine cancer | Nasopharynx cancer | Non-melanoma skin cancer | Malignant skin melanoma | Acute lymphoid leukemia | Thyroid cancer | Chronic lymphoid leukemia | Hodgkin lymphoma | Mesothelioma | Chronic myeloid leukemia | Testicular cancer |
|----------------------------------|-------------------------------------|-------------------------|----------------|--------------|---------------|-------------------|-------------------|-----------------|---------------------------|-----------------|----------------------|-----------------------------------------|----------------|----------------------------|----------------|--------------------------------------|---------------|----------------|---------------|----------------------|------------------|------------------------|----------------|--------------------|--------------------------|-------------------------|-------------------------|----------------|---------------------------|------------------|--------------|--------------------------|-------------------|
| Zambia                           | 8                                   | 4                       | 9              | 5            | 3             | 12                | 10                | 6               | 1                         | 2               | 7                    | 11                                      | 14             | 17                         | 13             | 27                                   | 25            | 16             | 19            | 26                   | 18               | 15                     | 21             | 23                 | 24                       | 28                      | 22                      | 29             | 31                        | 20               | 32           | 30                       | 33                |
| Malawi                           | 10                                  | 9                       | 11             | 7            | 5             | 12                | 1                 | 8               | 2                         | 4               | 3                    | 15                                      | 6              | 13                         | 16             | 23                                   | 21            | 20             | 25            | 32                   | 17               | 19                     | 22             | 28                 | 18                       | 14                      | 26                      | 27             | 31                        | 24               | 33           | 29                       | 30                |
| Somalia                          | 10                                  | 3                       | 7              | 8            | 5             | 13                | 4                 | 6               | 2                         | 1               | 9                    | 11                                      | 17             | 16                         | 12             | 25                                   | 26            | 14             | 20            | 28                   | 23               | 18                     | 21             | 22                 | 24                       | 27                      | 19                      | 29             | 31                        | 15               | 32           | 30                       | 33                |
| Rwanda                           | 6                                   | 5                       | 10             | 8            | 3             | 11                | 7                 | 4               | 2                         | 1               | 9                    | 13                                      | 17             | 14                         | 12             | 25                                   | 28            | 18             | 19            | 26                   | 16               | 15                     | 20             | 23                 | 24                       | 27                      | 21                      | 29             | 31                        | 22               | 32           | 30                       | 33                |
| Burundi                          | 9                                   | 7                       | 5              | 10           | 4             | 13                | 3                 | 6               | 2                         | 1               | 8                    | 11                                      | 17             | 12                         | 14             | 26                                   | 27            | 15             | 16            | 24                   | 20               | 19                     | 22             | 21                 | 25                       | 28                      | 23                      | 29             | 31                        | 18               | 32           | 30                       | 33                |
| South Sudan                      | 5                                   | 4                       | 10             | 7            | 8             | 12                | 3                 | 6               | 2                         | 1               | 9                    | 11                                      | 16             | 15                         | 13             | 26                                   | 24            | 14             | 18            | 27                   | 20               | 17                     | 23             | 21                 | 25                       | 28                      | 22                      | 29             | 31                        | 19               | 32           | 30                       | 33                |
| Eritrea                          | 10                                  | 4                       | 7              | 8            | 3             | 13                | 6                 | 9               | 2                         | 1               | 5                    | 11                                      | 17             | 14                         | 12             | 26                                   | 28            | 16             | 20            | 27                   | 24               | 15                     | 19             | 21                 | 25                       | 23                      | 22                      | 29             | 31                        | 18               | 32           | 30                       | 33                |
| Djibouti                         | 6                                   | 3                       | 10             | 8            | 4             | 11                | 7                 | 5               | 2                         | 1               | 9                    | 13                                      | 14             | 15                         | 12             | 27                                   | 24            | 21             | 18            | 26                   | 17               | 16                     | 19             | 20                 | 22                       | 28                      | 25                      | 29             | 31                        | 23               | 32           | 30                       | 33                |
| Comoros                          | 7                                   | 4                       | 9              | 8            | 2             | 11                | 6                 | 5               | 3                         | 1               | 10                   | 13                                      | 14             | 15                         | 12             | 24                                   | 27            | 20             | 19            | 28                   | 16               | 18                     | 17             | 22                 | 21                       | 25                      | 26                      | 29             | 31                        | 23               | 32           | 30                       | 33                |
| <b>High-income North America</b> | <b>1</b>                            | <b>2</b>                | <b>8</b>       | <b>6</b>     | <b>3</b>      | <b>4</b>          | <b>10</b>         | <b>5</b>        | <b>12</b>                 | <b>20</b>       | <b>7</b>             | <b>11</b>                               | <b>9</b>       | <b>21</b>                  | <b>14</b>      | <b>23</b>                            | <b>13</b>     | <b>19</b>      | <b>24</b>     | <b>26</b>            | <b>15</b>        | <b>16</b>              | <b>18</b>      | <b>32</b>          | <b>25</b>                | <b>17</b>               | <b>29</b>               | <b>28</b>      | <b>22</b>                 | <b>31</b>        | <b>27</b>    | <b>30</b>                | <b>33</b>         |
| United States                    | 1                                   | 2                       | 12             | 6            | 3             | 4                 | 9                 | 5               | 10                        | 20              | 7                    | 11                                      | 8              | 21                         | 14             | 24                                   | 13            | 19             | 23            | 26                   | 15               | 16                     | 18             | 32                 | 25                       | 17                      | 29                      | 28             | 22                        | 31               | 27           | 30                       | 33                |
| Canada                           | 1                                   | 2                       | 6              | 9            | 3             | 4                 | 10                | 5               | 12                        | 20              | 7                    | 11                                      | 8              | 21                         | 14             | 16                                   | 13            | 19             | 26            | 27                   | 15               | 17                     | 22             | 32                 | 25                       | 18                      | 30                      | 28             | 23                        | 31               | 24           | 29                       | 33                |
| <b>Central Latin America</b>     | <b>1</b>                            | <b>3</b>                | <b>2</b>       | <b>6</b>     | <b>5</b>      | <b>8</b>          | <b>16</b>         | <b>4</b>        | <b>9</b>                  | <b>7</b>        | <b>10</b>            | <b>11</b>                               | <b>18</b>      | <b>24</b>                  | <b>12</b>      | <b>13</b>                            | <b>14</b>     | <b>19</b>      | <b>23</b>     | <b>28</b>            | <b>17</b>        | <b>20</b>              | <b>22</b>      | <b>32</b>          | <b>21</b>                | <b>26</b>               | <b>15</b>               | <b>25</b>      | <b>31</b>                 | <b>27</b>        | <b>33</b>    | <b>29</b>                | <b>30</b>         |
| Mexico                           | 1                                   | 2                       | 3              | 6            | 4             | 7                 | 16                | 5               | 9                         | 8               | 10                   | 13                                      | 17             | 23                         | 12             | 14                                   | 11            | 21             | 22            | 31                   | 18               | 19                     | 24             | 33                 | 20                       | 26                      | 15                      | 25             | 32                        | 27               | 29           | 30                       | 28                |
| Colombia                         | 2                                   | 3                       | 1              | 6            | 5             | 7                 | 14                | 4               | 9                         | 8               | 10                   | 11                                      | 17             | 23                         | 13             | 12                                   | 18            | 20             | 22            | 30                   | 16               | 21                     | 24             | 31                 | 19                       | 25                      | 15                      | 26             | 28                        | 29               | 33           | 27                       | 32                |
| Venezuela                        | 1                                   | 4                       | 3              | 7            | 5             | 8                 | 15                | 2               | 9                         | 6               | 10                   | 13                                      | 18             | 23                         | 12             | 16                                   | 11            | 24             | 14            | 25                   | 19               | 22                     | 21             | 30                 | 17                       | 28                      | 20                      | 26             | 31                        | 27               | 33           | 29                       | 32                |
| Guatemala                        | 5                                   | 6                       | 1              | 2            | 7             | 9                 | 15                | 3               | 8                         | 4               | 13                   | 12                                      | 21             | 20                         | 18             | 14                                   | 19            | 10             | 23            | 26                   | 24               | 22                     | 16             | 27                 | 17                       | 29                      | 11                      | 25             | 32                        | 28               | 33           | 31                       | 30                |
| Honduras                         | 1                                   | 3                       | 2              | 14           | 4             | 8                 | 19                | 5               | 6                         | 15              | 16                   | 17                                      | 21             | 20                         | 12             | 10                                   | 23            | 11             | 26            | 22                   | 18               | 13                     | 7              | 28                 | 24                       | 30                      | 9                       | 27             | 29                        | 32               | 31           | 25                       | 33                |
| Nicaragua                        | 5                                   | 4                       | 1              | 2            | 6             | 9                 | 19                | 7               | 8                         | 3               | 11                   | 12                                      | 17             | 22                         | 14             | 10                                   | 16            | 15             | 18            | 27                   | 24               | 20                     | 23             | 31                 | 21                       | 29                      | 13                      | 25             | 30                        | 28               | 33           | 26                       | 32                |
| El Salvador                      | 2                                   | 3                       | 1              | 6            | 7             | 8                 | 16                | 5               | 10                        | 4               | 13                   | 12                                      | 17             | 19                         | 14             | 11                                   | 18            | 9              | 23            | 25                   | 21               | 24                     | 15             | 26                 | 22                       | 31                      | 20                      | 27             | 30                        | 28               | 32           | 29                       | 33                |
| Costa Rica                       | 4                                   | 2                       | 1              | 6            | 5             | 7                 | 17                | 3               | 9                         | 10              | 8                    | 11                                      | 14             | 23                         | 15             | 13                                   | 18            | 25             | 22            | 28                   | 12               | 19                     | 20             | 30                 | 21                       | 24                      | 16                      | 31             | 29                        | 27               | 33           | 26                       | 32                |

| Country                         | Tracheal, bronchus, and lung cancer | Colon and rectum cancer | Stomach cancer | Liver cancer | Breast cancer | Pancreatic cancer | Esophageal cancer | Prostate cancer | Other malignant neoplasms | Cervical cancer | Non-Hodgkin lymphoma | Brain and central nervous system cancer | Bladder cancer | Lip and oral cavity cancer | Ovarian cancer | Gallbladder and biliary tract cancer | Kidney cancer | Other leukemia | Larynx cancer | Other pharynx cancer | Multiple myeloma | Acute myeloid leukemia | Uterine cancer | Nasopharynx cancer | Non-melanoma skin cancer | Malignant skin melanoma | Acute lymphoid leukemia | Thyroid cancer | Chronic lymphoid leukemia | Hodgkin lymphoma | Mesothelioma | Chronic myeloid leukemia | Testicular cancer |
|---------------------------------|-------------------------------------|-------------------------|----------------|--------------|---------------|-------------------|-------------------|-----------------|---------------------------|-----------------|----------------------|-----------------------------------------|----------------|----------------------------|----------------|--------------------------------------|---------------|----------------|---------------|----------------------|------------------|------------------------|----------------|--------------------|--------------------------|-------------------------|-------------------------|----------------|---------------------------|------------------|--------------|--------------------------|-------------------|
| Panama                          | 1                                   | 3                       | 4              | 7            | 5             | 9                 | 16                | 2               | 8                         | 6               | 11                   | 10                                      | 19             | 21                         | 12             | 14                                   | 13            | 23             | 22            | 24                   | 17               | 20                     | 15             | 28                 | 25                       | 27                      | 18                      | 26             | 30                        | 31               | 32           | 29                       | 33                |
| <b>Tropical Latin America</b>   | <b>1</b>                            | <b>2</b>                | <b>3</b>       | <b>7</b>     | <b>5</b>      | <b>6</b>          | <b>9</b>          | <b>4</b>        | <b>8</b>                  | <b>11</b>       | <b>12</b>            | <b>10</b>                               | <b>16</b>      | <b>13</b>                  | <b>17</b>      | <b>14</b>                            | <b>18</b>     | <b>23</b>      | <b>15</b>     | <b>19</b>            | <b>20</b>        | <b>21</b>              | <b>24</b>      | <b>32</b>          | <b>22</b>                | <b>25</b>               | <b>26</b>               | <b>27</b>      | <b>29</b>                 | <b>30</b>        | <b>28</b>    | <b>31</b>                | <b>33</b>         |
| Brazil                          | 1                                   | 2                       | 3              | 7            | 5             | 6                 | 8                 | 4               | 9                         | 11              | 12                   | 10                                      | 16             | 13                         | 17             | 14                                   | 18            | 23             | 15            | 19                   | 20               | 21                     | 24             | 32                 | 22                       | 25                      | 26                      | 27             | 29                        | 30               | 28           | 31                       | 33                |
| Paraguay                        | 1                                   | 2                       | 6              | 10           | 4             | 8                 | 9                 | 3               | 7                         | 5               | 11                   | 15                                      | 21             | 16                         | 12             | 13                                   | 17            | 14             | 19            | 24                   | 25               | 20                     | 18             | 33                 | 22                       | 27                      | 23                      | 26             | 29                        | 28               | 32           | 30                       | 31                |
| <b>Eastern Europe</b>           | <b>1</b>                            | <b>2</b>                | <b>3</b>       | <b>8</b>     | <b>4</b>      | <b>6</b>          | <b>13</b>         | <b>7</b>        | <b>5</b>                  | <b>15</b>       | <b>16</b>            | <b>12</b>                               | <b>11</b>      | <b>14</b>                  | <b>10</b>      | <b>22</b>                            | <b>9</b>      | <b>23</b>      | <b>18</b>     | <b>20</b>            | <b>21</b>        | <b>24</b>              | <b>17</b>      | <b>31</b>          | <b>25</b>                | <b>19</b>               | <b>27</b>               | <b>28</b>      | <b>26</b>                 | <b>29</b>        | <b>32</b>    | <b>30</b>                | <b>33</b>         |
| Russian Federation              | 1                                   | 2                       | 3              | 7            | 4             | 6                 | 11                | 8               | 5                         | 15              | 14                   | 13                                      | 12             | 16                         | 10             | 21                                   | 9             | 23             | 18            | 22                   | 20               | 26                     | 17             | 32                 | 24                       | 19                      | 27                      | 28             | 25                        | 29               | 31           | 30                       | 33                |
| Ukraine                         | 1                                   | 2                       | 3              | 10           | 4             | 5                 | 14                | 6               | 7                         | 15              | 17                   | 9                                       | 12             | 13                         | 11             | 21                                   | 8             | 22             | 16            | 19                   | 24               | 23                     | 18             | 30                 | 25                       | 20                      | 27                      | 29             | 26                        | 28               | 32           | 31                       | 33                |
| Belarus                         | 1                                   | 2                       | 3              | 10           | 4             | 5                 | 14                | 7               | 6                         | 11              | 16                   | 12                                      | 15             | 13                         | 9              | 20                                   | 8             | 25             | 17            | 19                   | 21               | 22                     | 23             | 31                 | 24                       | 18                      | 27                      | 28             | 26                        | 29               | 32           | 30                       | 33                |
| Moldova                         | 1                                   | 2                       | 5              | 4            | 3             | 6                 | 18                | 8               | 7                         | 9               | 17                   | 10                                      | 12             | 14                         | 16             | 24                                   | 15            | 21             | 11            | 13                   | 23               | 25                     | 19             | 26                 | 22                       | 20                      | 28                      | 29             | 30                        | 27               | 32           | 33                       | 31                |
| Lithuania                       | 1                                   | 2                       | 3              | 13           | 4             | 6                 | 12                | 5               | 10                        | 14              | 15                   | 11                                      | 9              | 16                         | 7              | 22                                   | 8             | 26             | 18            | 23                   | 20               | 19                     | 17             | 31                 | 25                       | 21                      | 29                      | 27             | 24                        | 30               | 32           | 28                       | 33                |
| Latvia                          | 1                                   | 2                       | 3              | 12           | 4             | 5                 | 13                | 6               | 9                         | 17              | 15                   | 11                                      | 7              | 16                         | 8              | 24                                   | 10            | 26             | 19            | 23                   | 20               | 25                     | 14             | 32                 | 22                       | 18                      | 29                      | 27             | 21                        | 30               | 31           | 28                       | 33                |
| Estonia                         | 1                                   | 2                       | 3              | 11           | 6             | 4                 | 14                | 5               | 8                         | 15              | 13                   | 12                                      | 9              | 18                         | 10             | 20                                   | 7             | 25             | 22            | 24                   | 17               | 19                     | 21             | 31                 | 26                       | 16                      | 28                      | 27             | 23                        | 30               | 32           | 29                       | 33                |
| <b>High-income Asia Pacific</b> | <b>1</b>                            | <b>2</b>                | <b>3</b>       | <b>4</b>     | <b>7</b>      | <b>5</b>          | <b>10</b>         | <b>8</b>        | <b>11</b>                 | <b>17</b>       | <b>9</b>             | <b>19</b>                               | <b>12</b>      | <b>18</b>                  | <b>14</b>      | <b>6</b>                             | <b>13</b>     | <b>20</b>      | <b>26</b>     | <b>22</b>            | <b>15</b>        | <b>16</b>              | <b>21</b>      | <b>27</b>          | <b>24</b>                | <b>29</b>               | <b>28</b>               | <b>23</b>      | <b>31</b>                 | <b>32</b>        | <b>25</b>    | <b>30</b>                | <b>33</b>         |
| Japan                           | 1                                   | 2                       | 3              | 5            | 7             | 4                 | 9                 | 8               | 11                        | 18              | 10                   | 19                                      | 12             | 17                         | 14             | 6                                    | 13            | 21             | 26            | 22                   | 15               | 16                     | 20             | 27                 | 25                       | 29                      | 28                      | 23             | 31                        | 32               | 24           | 30                       | 33                |
| South Korea                     | 1                                   | 4                       | 3              | 2            | 7             | 5                 | 11                | 8               | 9                         | 17              | 10                   | 15                                      | 12             | 20                         | 16             | 6                                    | 13            | 14             | 22            | 23                   | 18               | 21                     | 25             | 26                 | 24                       | 27                      | 28                      | 19             | 32                        | 31               | 29           | 30                       | 33                |
| Singapore                       | 1                                   | 2                       | 5              | 3            | 4             | 6                 | 14                | 7               | 9                         | 16              | 10                   | 13                                      | 17             | 21                         | 11             | 18                                   | 15            | 24             | 22            | 23                   | 20               | 12                     | 19             | 8                  | 26                       | 29                      | 25                      | 28             | 32                        | 31               | 27           | 30                       | 33                |
| Brunei                          | 1                                   | 2                       | 5              | 4            | 3             | 9                 | 20                | 12              | 7                         | 8               | 6                    | 11                                      | 19             | 14                         | 10             | 16                                   | 17            | 26             | 27            | 21                   | 18               | 13                     | 22             | 15                 | 30                       | 28                      | 24                      | 25             | 33                        | 29               | 31           | 23                       | 32                |
| <b>Central SSA</b>              | <b>3</b>                            | <b>4</b>                | <b>7</b>       | <b>5</b>     | <b>2</b>      | <b>10</b>         | <b>6</b>          | <b>9</b>        | <b>8</b>                  | <b>1</b>        | <b>12</b>            | <b>11</b>                               | <b>14</b>      | <b>15</b>                  | <b>16</b>      | <b>19</b>                            | <b>22</b>     | <b>13</b>      | <b>18</b>     | <b>29</b>            | <b>21</b>        | <b>17</b>              | <b>20</b>      | <b>28</b>          | <b>23</b>                | <b>26</b>               | <b>25</b>               | <b>30</b>      | <b>32</b>                 | <b>24</b>        | <b>31</b>    | <b>27</b>                | <b>33</b>         |
| DRC                             | 3                                   | 5                       | 6              | 4            | 2             | 10                | 7                 | 9               | 8                         | 1               | 12                   | 11                                      | 14             | 15                         | 16             | 19                                   | 23            | 13             | 18            | 29                   | 22               | 17                     | 20             | 28                 | 21                       | 26                      | 25                      | 30             | 31                        | 24               | 33           | 27                       | 32                |
| Angola                          | 2                                   | 4                       | 8              | 6            | 3             | 10                | 5                 | 9               | 7                         | 1               | 11                   | 12                                      | 13             | 15                         | 17             | 21                                   | 19            | 14             | 18            | 27                   | 20               | 16                     | 22             | 29                 | 23                       | 26                      | 24                      | 30             | 32                        | 25               | 31           | 28                       | 33                |
| Congo                           | 3                                   | 4                       | 9              | 6            | 2             | 10                | 5                 | 7               | 8                         | 1               | 13                   | 12                                      | 11             | 15                         | 14             | 21                                   | 20            | 17             | 18            | 26                   | 22               | 16                     | 19             | 25                 | 23                       | 24                      | 29                      | 30             | 32                        | 27               | 31           | 28                       | 33                |

| Country                | Tracheal, bronchus, and lung cancer | Colon and rectum cancer | Stomach cancer | Liver cancer | Breast cancer | Pancreatic cancer | Esophageal cancer | Prostate cancer | Other malignant neoplasms | Cervical cancer | Non-Hodgkin lymphoma | Brain and central nervous system cancer | Bladder cancer | Lip and oral cavity cancer | Ovarian cancer | Gallbladder and biliary tract cancer | Kidney cancer | Other leukemia | Larynx cancer | Other pharynx cancer | Multiple myeloma | Acute myeloid leukemia | Uterine cancer | Nasopharynx cancer | Non-melanoma skin cancer | Malignant skin melanoma | Acute lymphoid leukemia | Thyroid cancer | Chronic lymphoid leukemia | Hodgkin lymphoma | Mesothelioma | Chronic myeloid leukemia | Testicular cancer |
|------------------------|-------------------------------------|-------------------------|----------------|--------------|---------------|-------------------|-------------------|-----------------|---------------------------|-----------------|----------------------|-----------------------------------------|----------------|----------------------------|----------------|--------------------------------------|---------------|----------------|---------------|----------------------|------------------|------------------------|----------------|--------------------|--------------------------|-------------------------|-------------------------|----------------|---------------------------|------------------|--------------|--------------------------|-------------------|
| CAR                    | 3                                   | 6                       | 4              | 7            | 2             | 10                | 5                 | 9               | 8                         | 1               | 12                   | 11                                      | 16             | 13                         | 17             | 20                                   | 22            | 14             | 15            | 29                   | 23               | 18                     | 19             | 26                 | 24                       | 28                      | 27                      | 30             | 33                        | 21               | 31           | 25                       | 32                |
| Gabon                  | 1                                   | 3                       | 9              | 6            | 2             | 10                | 5                 | 7               | 8                         | 4               | 12                   | 13                                      | 11             | 14                         | 15             | 21                                   | 19            | 20             | 16            | 24                   | 18               | 17                     | 23             | 26                 | 22                       | 25                      | 28                      | 30             | 32                        | 27               | 31           | 29                       | 33                |
| Equatorial Guinea      | 3                                   | 6                       | 10             | 5            | 1             | 9                 | 4                 | 7               | 8                         | 2               | 11                   | 12                                      | 15             | 14                         | 13             | 20                                   | 17            | 19             | 21            | 25                   | 18               | 16                     | 22             | 27                 | 23                       | 26                      | 24                      | 29             | 31                        | 28               | 32           | 30                       | 33                |
| <b>Central Europe</b>  | <b>1</b>                            | <b>2</b>                | <b>5</b>       | <b>7</b>     | <b>3</b>      | <b>4</b>          | <b>16</b>         | <b>6</b>        | <b>9</b>                  | <b>13</b>       | <b>15</b>            | <b>10</b>                               | <b>8</b>       | <b>17</b>                  | <b>12</b>      | <b>14</b>                            | <b>11</b>     | <b>26</b>      | <b>18</b>     | <b>21</b>            | <b>22</b>        | <b>23</b>              | <b>19</b>      | <b>30</b>          | <b>24</b>                | <b>20</b>               | <b>28</b>               | <b>27</b>      | <b>25</b>                 | <b>29</b>        | <b>32</b>    | <b>31</b>                | <b>33</b>         |
| Poland                 | 1                                   | 2                       | 4              | 13           | 3             | 5                 | 15                | 6               | 11                        | 14              | 16                   | 9                                       | 7              | 17                         | 10             | 12                                   | 8             | 26             | 18            | 24                   | 20               | 22                     | 19             | 32                 | 25                       | 21                      | 29                      | 27             | 23                        | 30               | 28           | 31                       | 33                |
| Romania                | 1                                   | 2                       | 3              | 5            | 4             | 6                 | 17                | 7               | 8                         | 9               | 18                   | 11                                      | 10             | 13                         | 12             | 19                                   | 15            | 23             | 14            | 16                   | 25               | 22                     | 21             | 27                 | 20                       | 24                      | 28                      | 29             | 26                        | 30               | 31           | 32                       | 33                |
| Czech Republic         | 1                                   | 2                       | 6              | 9            | 4             | 3                 | 15                | 5               | 11                        | 16              | 14                   | 13                                      | 10             | 18                         | 12             | 8                                    | 7             | 22             | 25            | 23                   | 17               | 21                     | 20             | 32                 | 26                       | 19                      | 29                      | 27             | 24                        | 28               | 31           | 30                       | 33                |
| Hungary                | 1                                   | 2                       | 5              | 8            | 3             | 4                 | 13                | 6               | 14                        | 19              | 16                   | 15                                      | 7              | 10                         | 12             | 11                                   | 9             | 25             | 18            | 17                   | 22               | 21                     | 23             | 27                 | 26                       | 20                      | 30                      | 28             | 24                        | 31               | 32           | 29                       | 33                |
| Serbia                 | 1                                   | 2                       | 6              | 7            | 3             | 4                 | 18                | 5               | 10                        | 11              | 15                   | 8                                       | 9              | 19                         | 12             | 14                                   | 13            | 17             | 16            | 23                   | 24               | 25                     | 20             | 30                 | 22                       | 21                      | 29                      | 27             | 26                        | 28               | 32           | 31                       | 33                |
| Bulgaria               | 1                                   | 2                       | 4              | 7            | 3             | 5                 | 18                | 6               | 10                        | 12              | 16                   | 8                                       | 9              | 17                         | 11             | 19                                   | 14            | 23             | 13            | 24                   | 25               | 21                     | 15             | 31                 | 22                       | 20                      | 28                      | 29             | 26                        | 27               | 33           | 30                       | 32                |
| Slovakia               | 1                                   | 2                       | 5              | 8            | 3             | 4                 | 16                | 6               | 7                         | 18              | 14                   | 10                                      | 12             | 15                         | 13             | 9                                    | 11            | 26             | 22            | 17                   | 20               | 23                     | 19             | 30                 | 25                       | 21                      | 27                      | 28             | 24                        | 29               | 33           | 32                       | 31                |
| Croatia                | 1                                   | 2                       | 5              | 7            | 3             | 6                 | 15                | 4               | 10                        | 20              | 12                   | 8                                       | 9              | 16                         | 13             | 14                                   | 11            | 26             | 18            | 23                   | 19               | 22                     | 21             | 32                 | 25                       | 17                      | 30                      | 28             | 24                        | 31               | 27           | 29                       | 33                |
| Bosnia and Herzegovina | 1                                   | 2                       | 3              | 6            | 4             | 5                 | 16                | 7               | 9                         | 14              | 17                   | 8                                       | 10             | 18                         | 11             | 12                                   | 13            | 28             | 15            | 23                   | 24               | 20                     | 19             | 31                 | 25                       | 21                      | 26                      | 27             | 22                        | 30               | 33           | 29                       | 32                |
| Albania                | 1                                   | 6                       | 2              | 5            | 8             | 7                 | 12                | 3               | 4                         | 14              | 13                   | 9                                       | 20             | 16                         | 17             | 18                                   | 11            | 23             | 10            | 25                   | 22               | 15                     | 21             | 30                 | 19                       | 26                      | 27                      | 28             | 24                        | 29               | 33           | 31                       | 32                |
| Macedonia              | 1                                   | 2                       | 3              | 7            | 4             | 6                 | 19                | 5               | 9                         | 14              | 17                   | 8                                       | 10             | 21                         | 12             | 15                                   | 18            | 24             | 11            | 26                   | 25               | 20                     | 16             | 32                 | 22                       | 13                      | 27                      | 29             | 23                        | 28               | 33           | 30                       | 31                |
| Slovenia               | 1                                   | 2                       | 6              | 7            | 5             | 4                 | 15                | 3               | 10                        | 20              | 9                    | 14                                      | 8              | 21                         | 13             | 11                                   | 12            | 27             | 24            | 18                   | 16               | 19                     | 22             | 32                 | 25                       | 17                      | 29                      | 30             | 23                        | 31               | 28           | 26                       | 33                |
| Montenegro             | 1                                   | 2                       | 6              | 7            | 3             | 4                 | 13                | 5               | 16                        | 12              | 18                   | 8                                       | 10             | 17                         | 11             | 15                                   | 14            | 30             | 9             | 25                   | 24               | 19                     | 22             | 33                 | 23                       | 21                      | 27                      | 28             | 20                        | 26               | 32           | 29                       | 31                |
| <b>Central Asia</b>    | <b>1</b>                            | <b>5</b>                | <b>2</b>       | <b>3</b>     | <b>4</b>      | <b>8</b>          | <b>6</b>          | <b>11</b>       | <b>7</b>                  | <b>10</b>       | <b>14</b>            | <b>9</b>                                | <b>15</b>      | <b>16</b>                  | <b>13</b>      | <b>21</b>                            | <b>12</b>     | <b>19</b>      | <b>17</b>     | <b>22</b>            | <b>25</b>        | <b>20</b>              | <b>18</b>      | <b>28</b>          | <b>24</b>                | <b>26</b>               | <b>23</b>               | <b>29</b>      | <b>30</b>                 | <b>27</b>        | <b>32</b>    | <b>31</b>                | <b>33</b>         |
| Uzbekistan             | 2                                   | 4                       | 1              | 5            | 3             | 10                | 7                 | 11              | 8                         | 9               | 12                   | 6                                       | 18             | 13                         | 16             | 26                                   | 15            | 19             | 14            | 21                   | 25               | 17                     | 20             | 27                 | 23                       | 28                      | 22                      | 31             | 29                        | 24               | 33           | 30                       | 32                |
| Kazakhstan             | 1                                   | 3                       | 2              | 6            | 4             | 7                 | 5                 | 11              | 8                         | 9               | 18                   | 13                                      | 15             | 14                         | 10             | 20                                   | 12            | 24             | 17            | 22                   | 25               | 19                     | 16             | 29                 | 26                       | 21                      | 23                      | 27             | 30                        | 28               | 32           | 31                       | 33                |
| Azerbaijan             | 1                                   | 3                       | 2              | 5            | 6             | 8                 | 4                 | 10              | 7                         | 12              | 17                   | 9                                       | 15             | 19                         | 16             | 18                                   | 11            | 13             | 14            | 26                   | 23               | 21                     | 20             | 30                 | 22                       | 27                      | 24                      | 28             | 31                        | 25               | 32           | 29                       | 33                |

| Country                       | Tracheal, bronchus, and lung cancer | Colon and rectum cancer | Stomach cancer | Liver cancer | Breast cancer | Pancreatic cancer | Esophageal cancer | Prostate cancer | Other malignant neoplasms | Cervical cancer | Non-Hodgkin lymphoma | Brain and central nervous system cancer | Bladder cancer | Lip and oral cavity cancer | Ovarian cancer | Gallbladder and biliary tract cancer | Kidney cancer | Other leukemia | Larynx cancer | Other pharynx cancer | Multiple myeloma | Acute myeloid leukemia | Uterine cancer | Nasopharynx cancer | Non-melanoma skin cancer | Malignant skin melanoma | Acute lymphoid leukemia | Thyroid cancer | Chronic lymphoid leukemia | Hodgkin lymphoma | Mesothelioma | Chronic myeloid leukemia | Testicular cancer |
|-------------------------------|-------------------------------------|-------------------------|----------------|--------------|---------------|-------------------|-------------------|-----------------|---------------------------|-----------------|----------------------|-----------------------------------------|----------------|----------------------------|----------------|--------------------------------------|---------------|----------------|---------------|----------------------|------------------|------------------------|----------------|--------------------|--------------------------|-------------------------|-------------------------|----------------|---------------------------|------------------|--------------|--------------------------|-------------------|
| Tajikistan                    | 3                                   | 5                       | 1              | 7            | 6             | 9                 | 8                 | 11              | 4                         | 13              | 10                   | 2                                       | 18             | 20                         | 15             | 24                                   | 12            | 14             | 21            | 25                   | 22               | 17                     | 16             | 23                 | 26                       | 27                      | 19                      | 32             | 31                        | 28               | 29           | 30                       | 33                |
| Kyrgyzstan                    | 2                                   | 4                       | 1              | 3            | 5             | 8                 | 9                 | 12              | 7                         | 6               | 15                   | 10                                      | 16             | 14                         | 11             | 20                                   | 13            | 18             | 22            | 24                   | 26               | 19                     | 17             | 28                 | 21                       | 25                      | 23                      | 27             | 31                        | 29               | 33           | 30                       | 32                |
| Turkmenistan                  | 1                                   | 5                       | 2              | 6            | 4             | 10                | 3                 | 12              | 7                         | 8               | 15                   | 9                                       | 17             | 13                         | 14             | 21                                   | 11            | 16             | 22            | 18                   | 20               | 19                     | 27             | 28                 | 25                       | 26                      | 23                      | 29             | 32                        | 24               | 33           | 31                       | 30                |
| Georgia                       | 1                                   | 4                       | 2              | 5            | 3             | 7                 | 15                | 8               | 6                         | 9               | 17                   | 10                                      | 11             | 16                         | 12             | 20                                   | 18            | 19             | 13            | 23                   | 26               | 24                     | 14             | 32                 | 21                       | 22                      | 29                      | 28             | 31                        | 25               | 30           | 33                       | 27                |
| Mongolia                      | 3                                   | 7                       | 2              | 1            | 8             | 9                 | 4                 | 15              | 5                         | 6               | 11                   | 10                                      | 20             | 14                         | 12             | 13                                   | 17            | 22             | 19            | 25                   | 23               | 16                     | 18             | 26                 | 27                       | 31                      | 21                      | 24             | 32                        | 29               | 30           | 28                       | 33                |
| Armenia                       | 1                                   | 2                       | 3              | 5            | 4             | 6                 | 16                | 8               | 7                         | 11              | 18                   | 9                                       | 10             | 20                         | 12             | 19                                   | 13            | 17             | 14            | 29                   | 22               | 23                     | 15             | 31                 | 21                       | 27                      | 26                      | 24             | 28                        | 32               | 25           | 30                       | 33                |
| <b>Southern SSA</b>           | <b>1</b>                            | <b>6</b>                | <b>8</b>       | <b>7</b>     | <b>5</b>      | <b>9</b>          | <b>4</b>          | <b>2</b>        | <b>10</b>                 | <b>3</b>        | <b>11</b>            | <b>17</b>                               | <b>13</b>      | <b>12</b>                  | <b>14</b>      | <b>24</b>                            | <b>23</b>     | <b>15</b>      | <b>19</b>     | <b>26</b>            | <b>18</b>        | <b>20</b>              | <b>21</b>      | <b>27</b>          | <b>16</b>                | <b>22</b>               | <b>30</b>               | <b>28</b>      | <b>31</b>                 | <b>29</b>        | <b>25</b>    | <b>33</b>                | <b>32</b>         |
| South Africa                  | 1                                   | 6                       | 9              | 7            | 5             | 8                 | 3                 | 2               | 10                        | 4               | 14                   | 17                                      | 16             | 12                         | 13             | 23                                   | 21            | 11             | 19            | 26                   | 18               | 20                     | 22             | 27                 | 15                       | 24                      | 31                      | 28             | 30                        | 29               | 25           | 33                       | 32                |
| Zimbabwe                      | 8                                   | 9                       | 7              | 2            | 6             | 11                | 5                 | 3               | 4                         | 1               | 10                   | 15                                      | 12             | 21                         | 13             | 23                                   | 27            | 16             | 17            | 28                   | 14               | 19                     | 18             | 26                 | 20                       | 22                      | 29                      | 25             | 31                        | 24               | 32           | 33                       | 30                |
| Namibia                       | 6                                   | 5                       | 11             | 10           | 1             | 9                 | 12                | 3               | 2                         | 4               | 8                    | 16                                      | 19             | 7                          | 17             | 25                                   | 24            | 18             | 14            | 20                   | 21               | 22                     | 23             | 28                 | 15                       | 13                      | 31                      | 29             | 32                        | 27               | 26           | 33                       | 30                |
| Botswana                      | 1                                   | 5                       | 10             | 7            | 3             | 9                 | 6                 | 2               | 8                         | 4               | 11                   | 16                                      | 15             | 13                         | 12             | 24                                   | 23            | 14             | 20            | 25                   | 18               | 19                     | 21             | 27                 | 17                       | 22                      | 30                      | 28             | 31                        | 29               | 26           | 32                       | 33                |
| Lesotho                       | 2                                   | 8                       | 7              | 5            | 4             | 10                | 3                 | 6               | 9                         | 1               | 12                   | 16                                      | 17             | 11                         | 14             | 23                                   | 25            | 13             | 15            | 26                   | 20               | 21                     | 19             | 27                 | 18                       | 22                      | 31                      | 29             | 33                        | 28               | 24           | 32                       | 30                |
| Swaziland                     | 2                                   | 6                       | 9              | 3            | 5             | 10                | 1                 | 7               | 8                         | 4               | 12                   | 15                                      | 17             | 11                         | 13             | 24                                   | 22            | 14             | 16            | 25                   | 20               | 19                     | 21             | 26                 | 18                       | 23                      | 30                      | 29             | 32                        | 28               | 27           | 33                       | 31                |
| <b>Southern Latin America</b> | <b>1</b>                            | <b>2</b>                | <b>3</b>       | <b>10</b>    | <b>4</b>      | <b>6</b>          | <b>11</b>         | <b>5</b>        | <b>9</b>                  | <b>8</b>        | <b>13</b>            | <b>15</b>                               | <b>14</b>      | <b>21</b>                  | <b>16</b>      | <b>7</b>                             | <b>12</b>     | <b>17</b>      | <b>20</b>     | <b>27</b>            | <b>18</b>        | <b>22</b>              | <b>19</b>      | <b>33</b>          | <b>23</b>                | <b>24</b>               | <b>25</b>               | <b>26</b>      | <b>28</b>                 | <b>29</b>        | <b>31</b>    | <b>32</b>                | <b>30</b>         |
| Argentina                     | 1                                   | 2                       | 4              | 12           | 3             | 5                 | 10                | 6               | 9                         | 7               | 13                   | 15                                      | 14             | 21                         | 16             | 8                                    | 11            | 17             | 18            | 29                   | 20               | 22                     | 19             | 33                 | 24                       | 23                      | 25                      | 26             | 30                        | 27               | 28           | 32                       | 31                |
| Chile                         | 2                                   | 3                       | 1              | 8            | 6             | 7                 | 12                | 4               | 9                         | 10              | 13                   | 16                                      | 14             | 23                         | 17             | 5                                    | 11            | 19             | 24            | 28                   | 15               | 21                     | 20             | 33                 | 18                       | 22                      | 25                      | 26             | 29                        | 31               | 32           | 30                       | 27                |
| Uruguay                       | 1                                   | 2                       | 4              | 16           | 3             | 6                 | 8                 | 5               | 13                        | 9               | 11                   | 15                                      | 12             | 21                         | 14             | 7                                    | 10            | 18             | 19            | 26                   | 17               | 23                     | 20             | 31                 | 25                       | 22                      | 30                      | 27             | 24                        | 28               | 32           | 29                       | 33                |
| <b>Andean Latin America</b>   | <b>2</b>                            | <b>4</b>                | <b>1</b>       | <b>5</b>     | <b>7</b>      | <b>9</b>          | <b>18</b>         | <b>3</b>        | <b>8</b>                  | <b>6</b>        | <b>10</b>            | <b>12</b>                               | <b>20</b>      | <b>22</b>                  | <b>14</b>      | <b>11</b>                            | <b>15</b>     | <b>13</b>      | <b>26</b>     | <b>27</b>            | <b>17</b>        | <b>21</b>              | <b>16</b>      | <b>33</b>          | <b>23</b>                | <b>25</b>               | <b>19</b>               | <b>24</b>      | <b>32</b>                 | <b>28</b>        | <b>31</b>    | <b>29</b>                | <b>30</b>         |
| Peru                          | 2                                   | 4                       | 1              | 5            | 6             | 8                 | 19                | 3               | 9                         | 7               | 10                   | 12                                      | 18             | 22                         | 15             | 11                                   | 14            | 13             | 26            | 27                   | 16               | 20                     | 17             | 33                 | 23                       | 25                      | 21                      | 24             | 32                        | 28               | 31           | 29                       | 30                |
| Ecuador                       | 3                                   | 4                       | 1              | 5            | 7             | 9                 | 20                | 2               | 8                         | 6               | 10                   | 11                                      | 23             | 24                         | 13             | 12                                   | 17            | 15             | 26            | 27                   | 18               | 19                     | 14             | 33                 | 21                       | 25                      | 16                      | 22             | 32                        | 28               | 31           | 29                       | 30                |
| Bolivia                       | 3                                   | 5                       | 1              | 6            | 7             | 10                | 16                | 2               | 8                         | 4               | 9                    | 12                                      | 17             | 22                         | 15             | 11                                   | 18            | 13             | 24            | 27                   | 20               | 21                     | 14             | 31                 | 26                       | 25                      | 19                      | 23             | 33                        | 28               | 29           | 30                       | 32                |
| <b>Caribbean</b>              | <b>1</b>                            | <b>3</b>                | <b>5</b>       | <b>7</b>     | <b>4</b>      | <b>9</b>          | <b>10</b>         | <b>2</b>        | <b>8</b>                  | <b>6</b>        | <b>11</b>            | <b>14</b>                               | <b>13</b>      | <b>16</b>                  | <b>19</b>      | <b>22</b>                            | <b>20</b>     | <b>17</b>      | <b>12</b>     | <b>24</b>            | <b>18</b>        | <b>23</b>              | <b>15</b>      | <b>25</b>          | <b>21</b>                | <b>27</b>               | <b>26</b>               | <b>28</b>      | <b>31</b>                 | <b>29</b>        | <b>32</b>    | <b>30</b>                | <b>33</b>         |

| Country                          | Tracheal, bronchus, and lung cancer | Colon and rectum cancer | Stomach cancer | Liver cancer | Breast cancer | Pancreatic cancer | Esophageal cancer | Prostate cancer | Other malignant neoplasms | Cervical cancer | Non-Hodgkin lymphoma | Brain and central nervous system cancer | Bladder cancer | Lip and oral cavity cancer | Ovarian cancer | Gallbladder and biliary tract cancer | Kidney cancer | Other leukemia | Larynx cancer | Other pharynx cancer | Multiple myeloma | Acute myeloid leukemia | Uterine cancer | Nasopharynx cancer | Non-melanoma skin cancer | Malignant skin melanoma | Acute lymphoid leukemia | Thyroid cancer | Chronic lymphoid leukemia | Hodgkin lymphoma | Mesothelioma | Chronic myeloid leukemia | Testicular cancer |
|----------------------------------|-------------------------------------|-------------------------|----------------|--------------|---------------|-------------------|-------------------|-----------------|---------------------------|-----------------|----------------------|-----------------------------------------|----------------|----------------------------|----------------|--------------------------------------|---------------|----------------|---------------|----------------------|------------------|------------------------|----------------|--------------------|--------------------------|-------------------------|-------------------------|----------------|---------------------------|------------------|--------------|--------------------------|-------------------|
| Haiti                            | 5                                   | 6                       | 3              | 8            | 4             | 12                | 11                | 1               | 7                         | 2               | 9                    | 15                                      | 16             | 17                         | 18             | 19                                   | 21            | 10             | 13            | 25                   | 20               | 22                     | 14             | 29                 | 26                       | 27                      | 24                      | 30             | 31                        | 23               | 32           | 28                       | 33                |
| Cuba                             | 1                                   | 3                       | 5              | 8            | 4             | 6                 | 9                 | 2               | 10                        | 12              | 13                   | 14                                      | 11             | 16                         | 19             | 22                                   | 20            | 24             | 7             | 21                   | 17               | 23                     | 15             | 30                 | 18                       | 27                      | 31                      | 28             | 26                        | 29               | 32           | 25                       | 33                |
| Dominican Republic               | 2                                   | 3                       | 6              | 5            | 4             | 9                 | 14                | 1               | 8                         | 7               | 13                   | 11                                      | 21             | 12                         | 17             | 22                                   | 23            | 10             | 15            | 18                   | 16               | 24                     | 20             | 25                 | 19                       | 28                      | 26                      | 27             | 30                        | 29               | 32           | 31                       | 33                |
| Jamaica                          | 2                                   | 3                       | 5              | 10           | 4             | 9                 | 13                | 1               | 7                         | 6               | 8                    | 18                                      | 16             | 20                         | 15             | 19                                   | 21            | 11             | 17            | 23                   | 14               | 22                     | 12             | 27                 | 25                       | 26                      | 29                      | 24             | 30                        | 31               | 32           | 28                       | 33                |
| Trinidad and Tobago              | 4                                   | 2                       | 7              | 9            | 3             | 6                 | 17                | 1               | 8                         | 5               | 11                   | 18                                      | 16             | 19                         | 10             | 21                                   | 14            | 15             | 22            | 23                   | 13               | 20                     | 12             | 29                 | 26                       | 28                      | 24                      | 25             | 31                        | 30               | 32           | 27                       | 33                |
| Guyana                           | 5                                   | 4                       | 6              | 7            | 2             | 9                 | 14                | 1               | 8                         | 3               | 12                   | 17                                      | 19             | 16                         | 10             | 18                                   | 15            | 13             | 20            | 26                   | 21               | 29                     | 11             | 32                 | 24                       | 27                      | 22                      | 25             | 31                        | 28               | 30           | 23                       | 33                |
| Suriname                         | 1                                   | 3                       | 7              | 6            | 4             | 9                 | 18                | 2               | 8                         | 5               | 11                   | 10                                      | 15             | 17                         | 12             | 20                                   | 16            | 13             | 21            | 27                   | 14               | 23                     | 19             | 22                 | 25                       | 24                      | 29                      | 26             | 31                        | 28               | 32           | 30                       | 33                |
| Belize                           | 2                                   | 6                       | 5              | 4            | 7             | 8                 | 12                | 1               | 9                         | 3               | 13                   | 11                                      | 17             | 18                         | 19             | 20                                   | 16            | 10             | 15            | 24                   | 21               | 30                     | 14             | 28                 | 22                       | 27                      | 23                      | 29             | 31                        | 25               | 26           | 32                       | 33                |
| The Bahamas                      | 4                                   | 3                       | 5              | 8            | 2             | 10                | 9                 | 1               | 7                         | 6               | 12                   | 17                                      | 20             | 14                         | 13             | 19                                   | 18            | 23             | 16            | 22                   | 11               | 21                     | 15             | 29                 | 25                       | 24                      | 30                      | 28             | 26                        | 31               | 32           | 27                       | 33                |
| Barbados                         | 5                                   | 2                       | 4              | 10           | 3             | 7                 | 12                | 1               | 8                         | 6               | 9                    | 18                                      | 15             | 19                         | 14             | 22                                   | 17            | 16             | 21            | 23                   | 11               | 20                     | 13             | 27                 | 24                       | 26                      | 31                      | 25             | 28                        | 30               | 32           | 29                       | 33                |
| Saint Lucia                      | 3                                   | 5                       | 4              | 10           | 2             | 7                 | 11                | 1               | 8                         | 6               | 9                    | 19                                      | 14             | 15                         | 13             | 21                                   | 20            | 18             | 17            | 22                   | 12               | 23                     | 16             | 26                 | 28                       | 24                      | 30                      | 27             | 25                        | 31               | 32           | 29                       | 33                |
| Saint Vincent and the Grenadines | 4                                   | 3                       | 5              | 9            | 2             | 10                | 16                | 1               | 8                         | 6               | 7                    | 19                                      | 17             | 11                         | 15             | 23                                   | 20            | 14             | 13            | 21                   | 18               | 24                     | 12             | 28                 | 22                       | 27                      | 31                      | 26             | 25                        | 30               | 32           | 29                       | 33                |
| Grenada                          | 4                                   | 2                       | 5              | 10           | 3             | 6                 | 11                | 1               | 9                         | 7               | 8                    | 18                                      | 15             | 17                         | 13             | 20                                   | 22            | 16             | 19            | 24                   | 14               | 28                     | 12             | 29                 | 23                       | 27                      | 30                      | 25             | 21                        | 32               | 31           | 26                       | 33                |
| Antigua and Barbuda              | 5                                   | 3                       | 4              | 6            | 2             | 8                 | 12                | 1               | 9                         | 7               | 11                   | 16                                      | 15             | 20                         | 10             | 21                                   | 19            | 13             | 18            | 25                   | 14               | 22                     | 17             | 27                 | 23                       | 24                      | 29                      | 26             | 31                        | 30               | 32           | 28                       | 33                |
| Dominica                         | 3                                   | 5                       | 2              | 8            | 4             | 9                 | 11                | 1               | 7                         | 6               | 10                   | 22                                      | 13             | 15                         | 21             | 19                                   | 18            | 14             | 16            | 20                   | 12               | 24                     | 17             | 29                 | 25                       | 26                      | 23                      | 27             | 30                        | 31               | 32           | 28                       | 33                |
| <b>Australasia</b>               | <b>1</b>                            | <b>2</b>                | <b>7</b>       | <b>9</b>     | <b>4</b>      | <b>5</b>          | <b>10</b>         | <b>3</b>        | <b>12</b>                 | <b>23</b>       | <b>6</b>             | <b>11</b>                               | <b>14</b>      | <b>21</b>                  | <b>16</b>      | <b>20</b>                            | <b>13</b>     | <b>24</b>      | <b>28</b>     | <b>26</b>            | <b>15</b>        | <b>17</b>              | <b>22</b>      | <b>29</b>          | <b>18</b>                | <b>8</b>                | <b>27</b>               | <b>31</b>      | <b>25</b>                 | <b>32</b>        | <b>19</b>    | <b>30</b>                | <b>33</b>         |
| Australia                        | 1                                   | 2                       | 7              | 8            | 4             | 5                 | 10                | 3               | 12                        | 24              | 6                    | 11                                      | 14             | 21                         | 16             | 20                                   | 13            | 23             | 28            | 25                   | 15               | 17                     | 22             | 29                 | 19                       | 9                       | 27                      | 31             | 26                        | 32               | 18           | 30                       | 33                |
| New Zealand                      | 1                                   | 2                       | 7              | 9            | 3             | 5                 | 11                | 4               | 10                        | 24              | 6                    | 12                                      | 14             | 23                         | 16             | 19                                   | 13            | 25             | 28            | 26                   | 15               | 17                     | 20             | 29                 | 18                       | 8                       | 27                      | 30             | 21                        | 32               | 22           | 31                       | 33                |
| <b>Oceania</b>                   | <b>1</b>                            | <b>6</b>                | <b>2</b>       | <b>5</b>     | <b>3</b>      | <b>12</b>         | <b>17</b>         | <b>8</b>        | <b>7</b>                  | <b>4</b>        | <b>11</b>            | <b>13</b>                               | <b>20</b>      | <b>14</b>                  | <b>16</b>      | <b>22</b>                            | <b>25</b>     | <b>9</b>       | <b>19</b>     | <b>21</b>            | <b>23</b>        | <b>18</b>              | <b>10</b>      | <b>15</b>          | <b>24</b>                | <b>27</b>               | <b>28</b>               | <b>26</b>      | <b>32</b>                 | <b>29</b>        | <b>33</b>    | <b>30</b>                | <b>31</b>         |
| Papua New Guinea                 | 1                                   | 6                       | 2              | 5            | 4             | 14                | 17                | 8               | 7                         | 3               | 11                   | 12                                      | 21             | 15                         | 16             | 22                                   | 25            | 9              | 18            | 20                   | 24               | 19                     | 10             | 13                 | 23                       | 27                      | 26                      | 30             | 32                        | 28               | 33           | 29                       | 31                |



| Country                        | Tracheal, bronchus, and lung cancer | Colon and rectum cancer | Stomach cancer | Liver cancer | Breast cancer | Pancreatic cancer | Esophageal cancer | Prostate cancer | Other malignant neoplasms | Cervical cancer | Non-Hodgkin lymphoma | Brain and central nervous system cancer | Bladder cancer | Lip and oral cavity cancer | Ovarian cancer | Gallbladder and biliary tract cancer | Kidney cancer | Other leukemia | Larynx cancer | Other pharynx cancer | Multiple myeloma | Acute myeloid leukemia | Uterine cancer | Nasopharynx cancer | Non-melanoma skin cancer | Malignant skin melanoma | Acute lymphoid leukemia | Thyroid cancer | Chronic lymphoid leukemia | Hodgkin lymphoma | Mesothelioma | Chronic myeloid leukemia | Testicular cancer |
|--------------------------------|-------------------------------------|-------------------------|----------------|--------------|---------------|-------------------|-------------------|-----------------|---------------------------|-----------------|----------------------|-----------------------------------------|----------------|----------------------------|----------------|--------------------------------------|---------------|----------------|---------------|----------------------|------------------|------------------------|----------------|--------------------|--------------------------|-------------------------|-------------------------|----------------|---------------------------|------------------|--------------|--------------------------|-------------------|
| Fiji                           | 5                                   | 4                       | 8              | 3            | 1             | 9                 | 14                | 6               | 7                         | 2               | 13                   | 15                                      | 16             | 12                         | 23             | 21                                   | 24            | 17             | 22            | 20                   | 18               | 11                     | 10             | 26                 | 25                       | 29                      | 27                      | 19             | 30                        | 32               | 31           | 33                       | 28                |
| Solomon Islands                | 1                                   | 6                       | 2              | 4            | 3             | 11                | 15                | 8               | 7                         | 5               | 12                   | 13                                      | 20             | 17                         | 16             | 22                                   | 25            | 10             | 19            | 21                   | 23               | 18                     | 9              | 14                 | 24                       | 28                      | 27                      | 26             | 31                        | 30               | 32           | 29                       | 33                |
| Vanuatu                        | 1                                   | 6                       | 5              | 2            | 3             | 10                | 20                | 4               | 7                         | 8               | 11                   | 15                                      | 17             | 13                         | 18             | 21                                   | 25            | 9              | 19            | 24                   | 26               | 14                     | 12             | 16                 | 22                       | 23                      | 27                      | 28             | 31                        | 29               | 32           | 30                       | 33                |
| Samoa                          | 3                                   | 2                       | 1              | 8            | 4             | 10                | 15                | 7               | 5                         | 6               | 9                    | 14                                      | 18             | 20                         | 13             | 23                                   | 25            | 11             | 26            | 32                   | 17               | 21                     | 12             | 19                 | 22                       | 16                      | 28                      | 24             | 29                        | 27               | 33           | 31                       | 30                |
| Kiribati                       | 2                                   | 6                       | 5              | 4            | 3             | 12                | 9                 | 11              | 8                         | 1               | 14                   | 16                                      | 21             | 7                          | 22             | 20                                   | 19            | 13             | 23            | 17                   | 24               | 18                     | 10             | 25                 | 30                       | 28                      | 27                      | 31             | 29                        | 32               | 33           | 26                       | 15                |
| Federated States of Micronesia | 1                                   | 5                       | 4              | 3            | 2             | 9                 | 16                | 8               | 7                         | 6               | 11                   | 15                                      | 18             | 14                         | 12             | 24                                   | 23            | 13             | 20            | 22                   | 21               | 19                     | 10             | 17                 | 25                       | 27                      | 28                      | 26             | 30                        | 32               | 31           | 29                       | 33                |
| Tonga                          | 1                                   | 7                       | 4              | 2            | 3             | 10                | 13                | 5               | 11                        | 6               | 9                    | 16                                      | 18             | 17                         | 15             | 25                                   | 22            | 19             | 24            | 26                   | 20               | 21                     | 12             | 23                 | 14                       | 27                      | 29                      | 28             | 30                        | 31               | 33           | 32                       | 8                 |
| Marshall Islands               | 1                                   | 5                       | 4              | 3            | 2             | 9                 | 13                | 8               | 7                         | 6               | 11                   | 15                                      | 20             | 17                         | 14             | 24                                   | 23            | 12             | 18            | 22                   | 21               | 19                     | 10             | 16                 | 25                       | 27                      | 28                      | 26             | 31                        | 30               | 32           | 29                       | 33                |

Colors correspond to the ranking, with dark red as the most common cancer and dark green as the least common cancer for the location indicated. Rankings do not include the "other malignant cancer" group. The numbers inside each box indicate the ranking. Abbreviations: SSA: Sub-Saharan Africa; DRC: Democratic Republic of Congo; CAR: Central African Republic

Figure 6: Cancer ranking by total mortality based on global level for developing and developed regions and all countries, both sexes, 2017

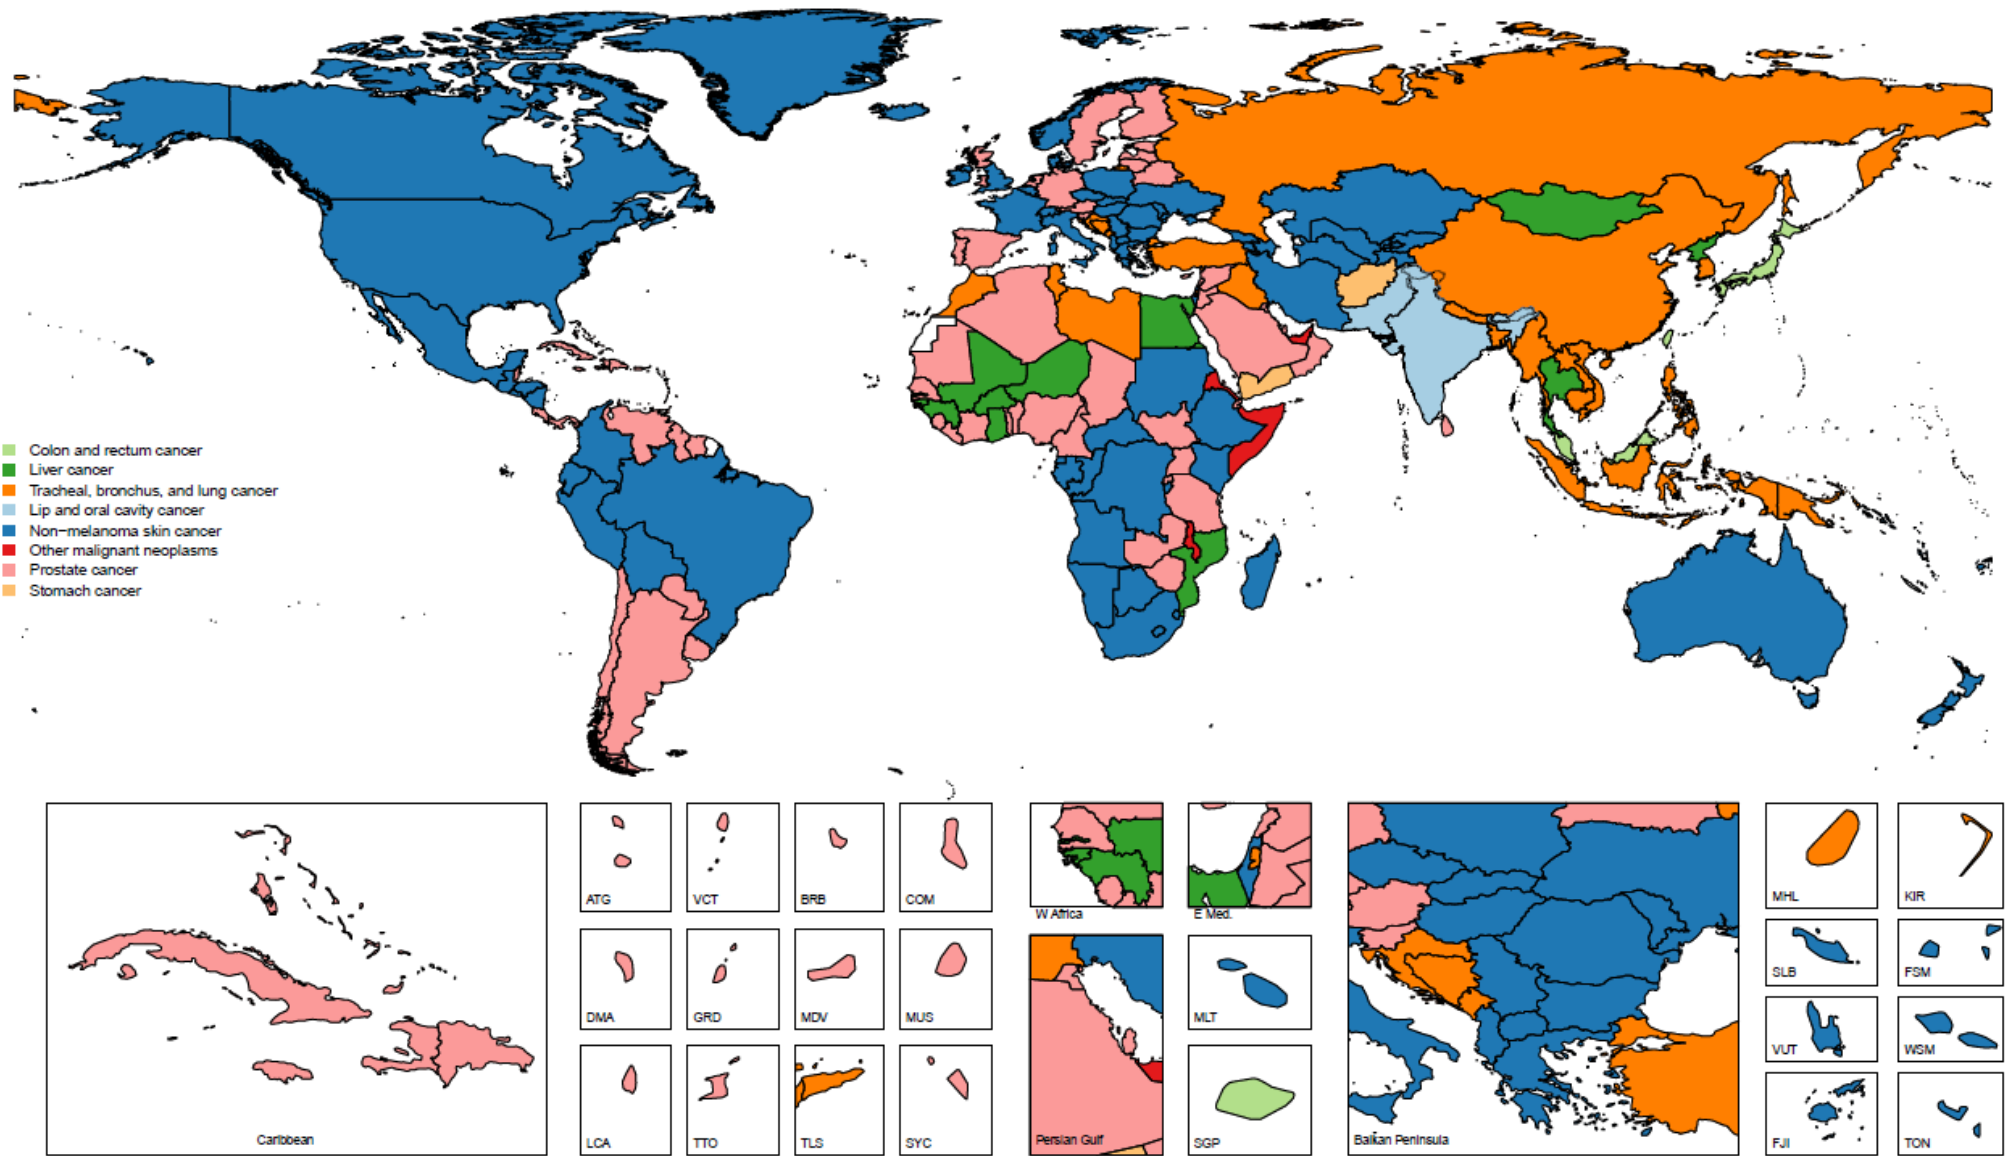

Figure 7: Top-ranked cancers by absolute incident cases for all ages in males, 2017

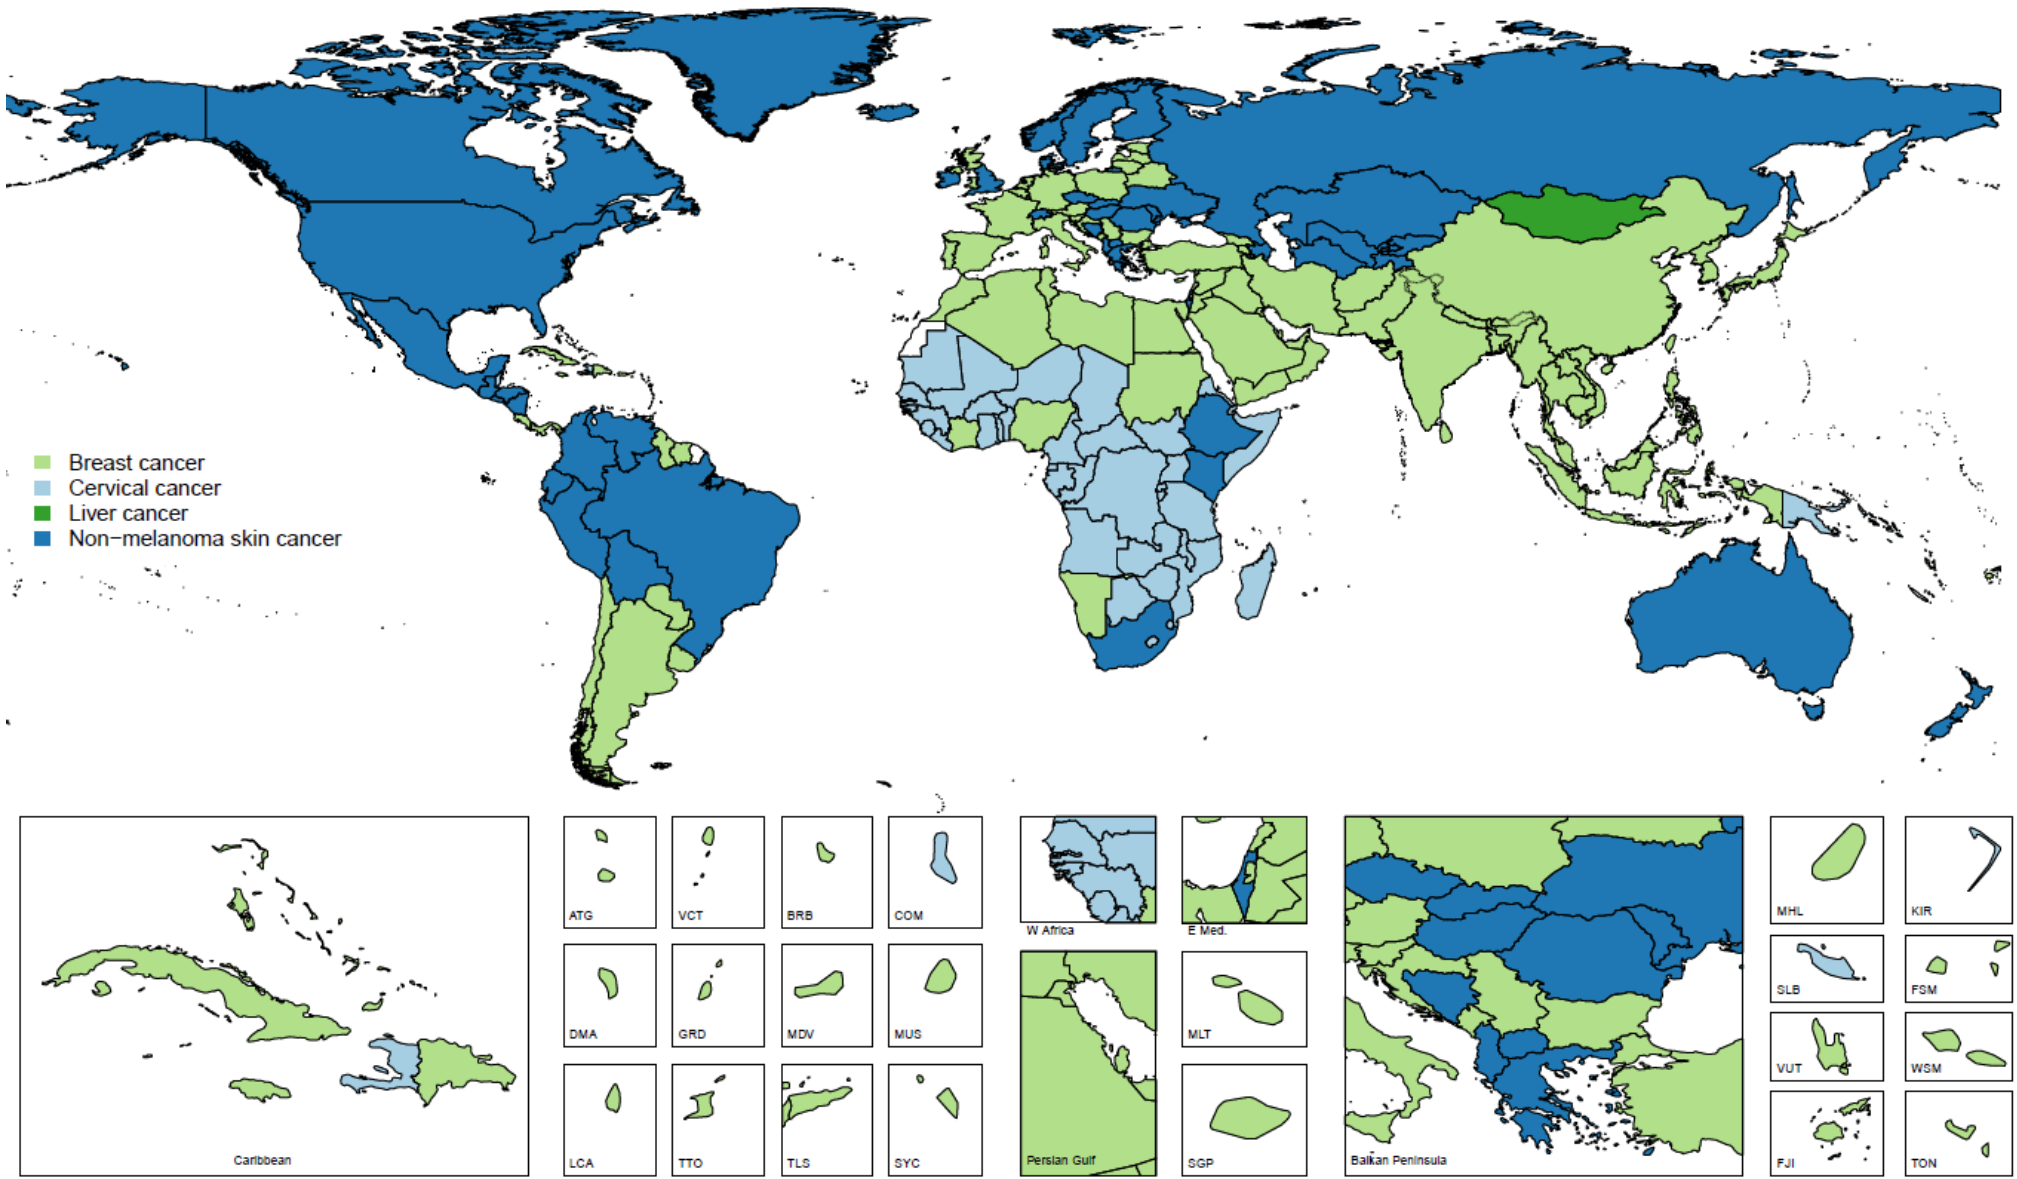

eFigure 8: Top-ranked cancers by absolute incident cases for all ages in females, 2017

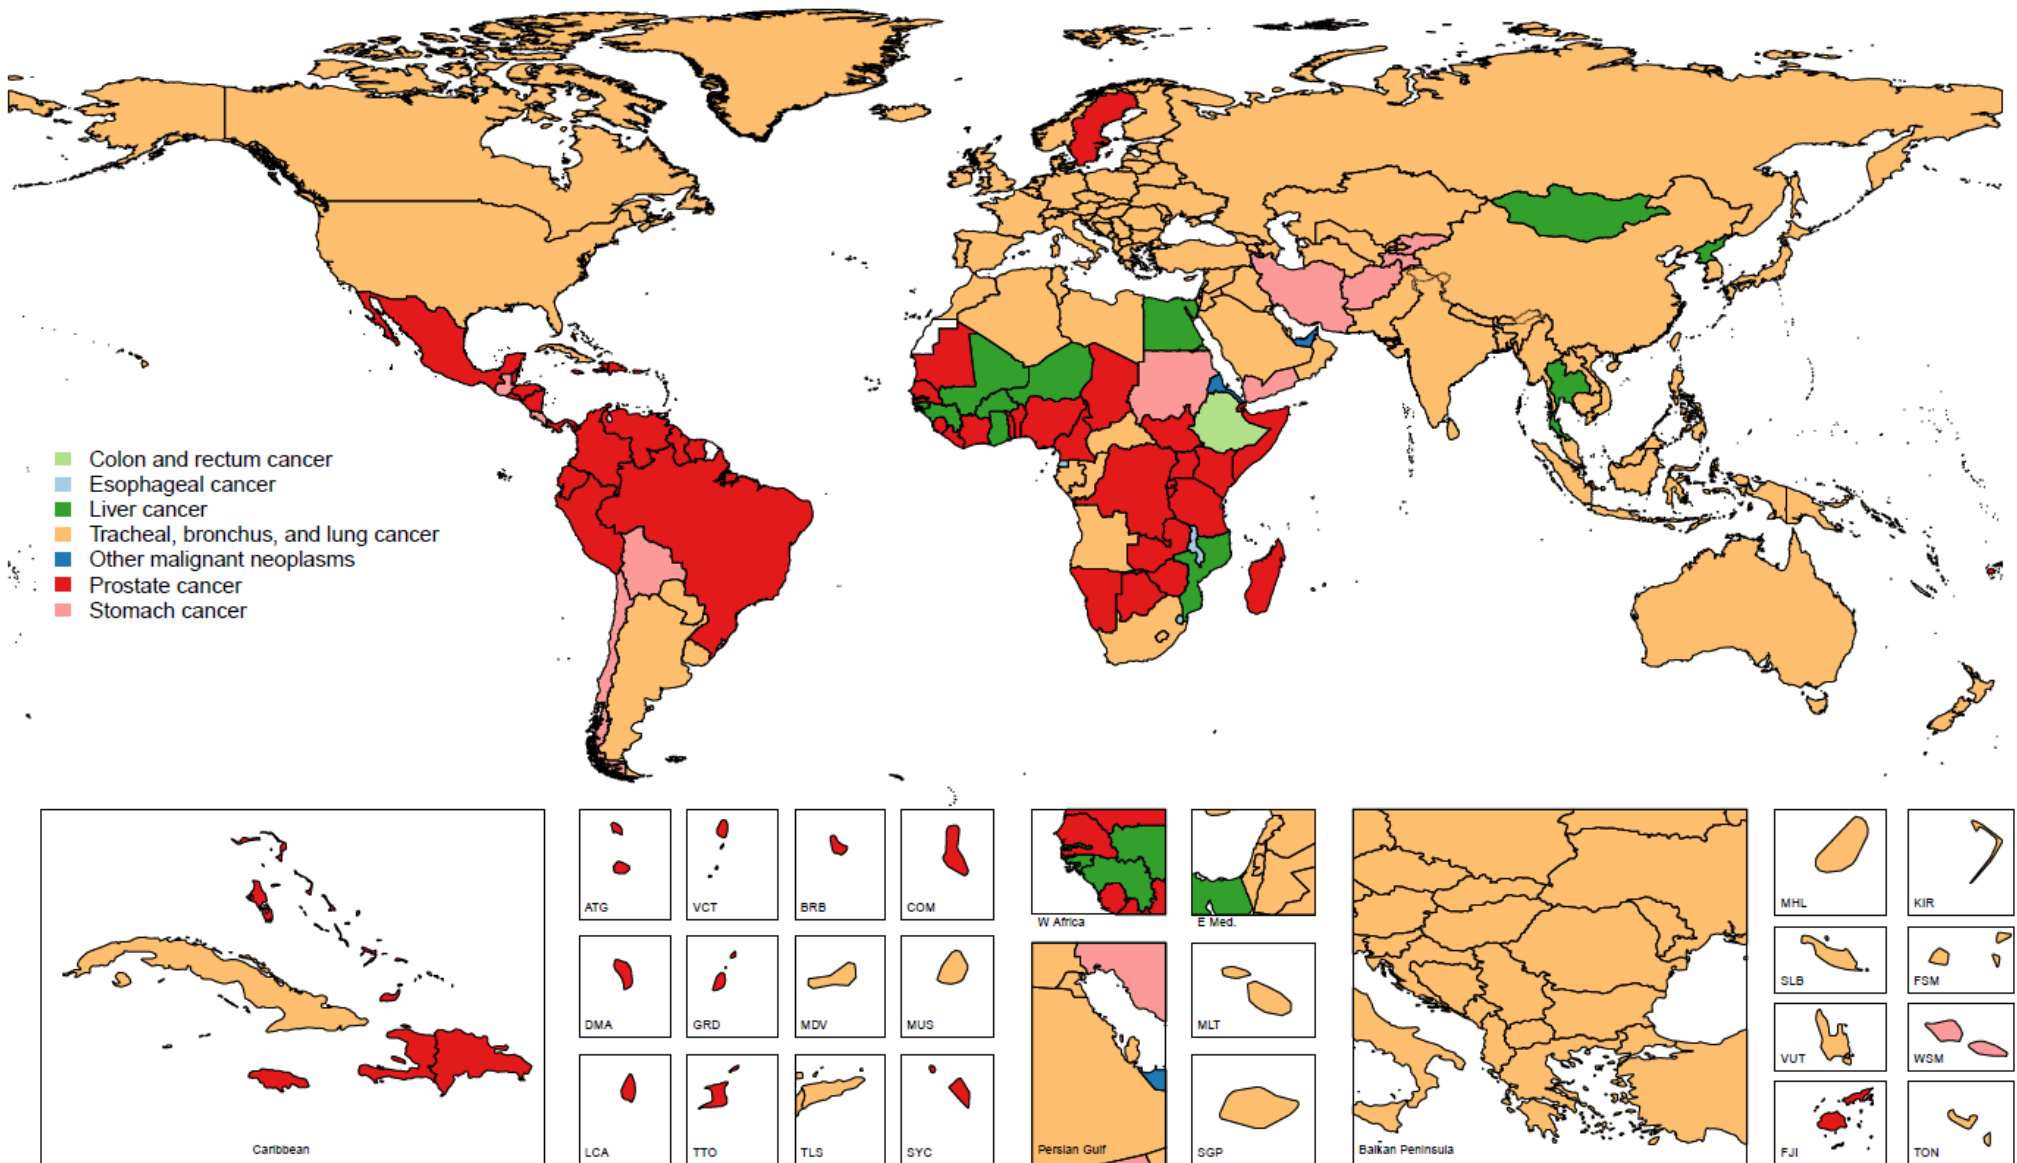

Figure 9: Top-ranked cancers by absolute deaths for all ages in males, 2017

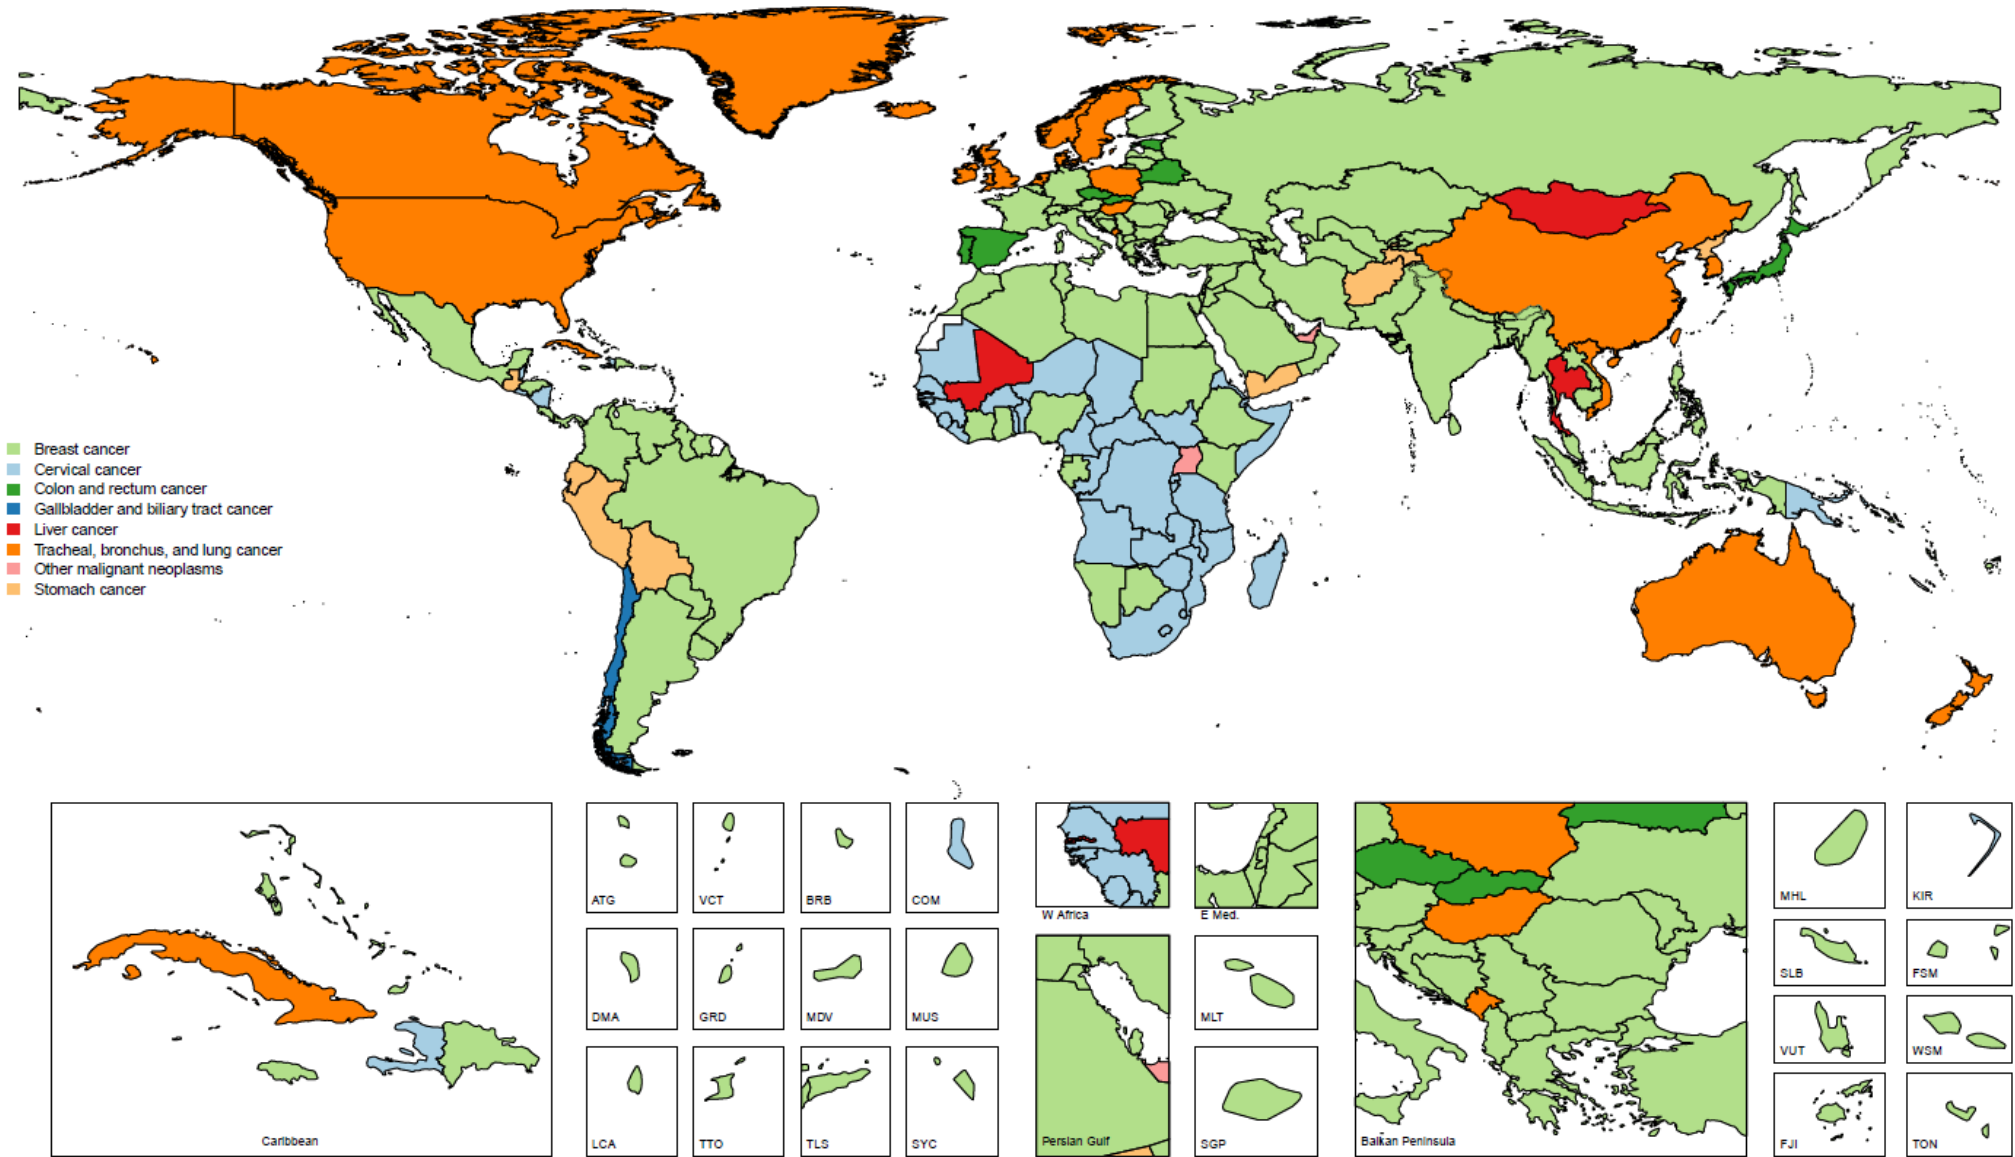

Figure 10: Top-ranked cancers by absolute deaths for all ages in females, 2017

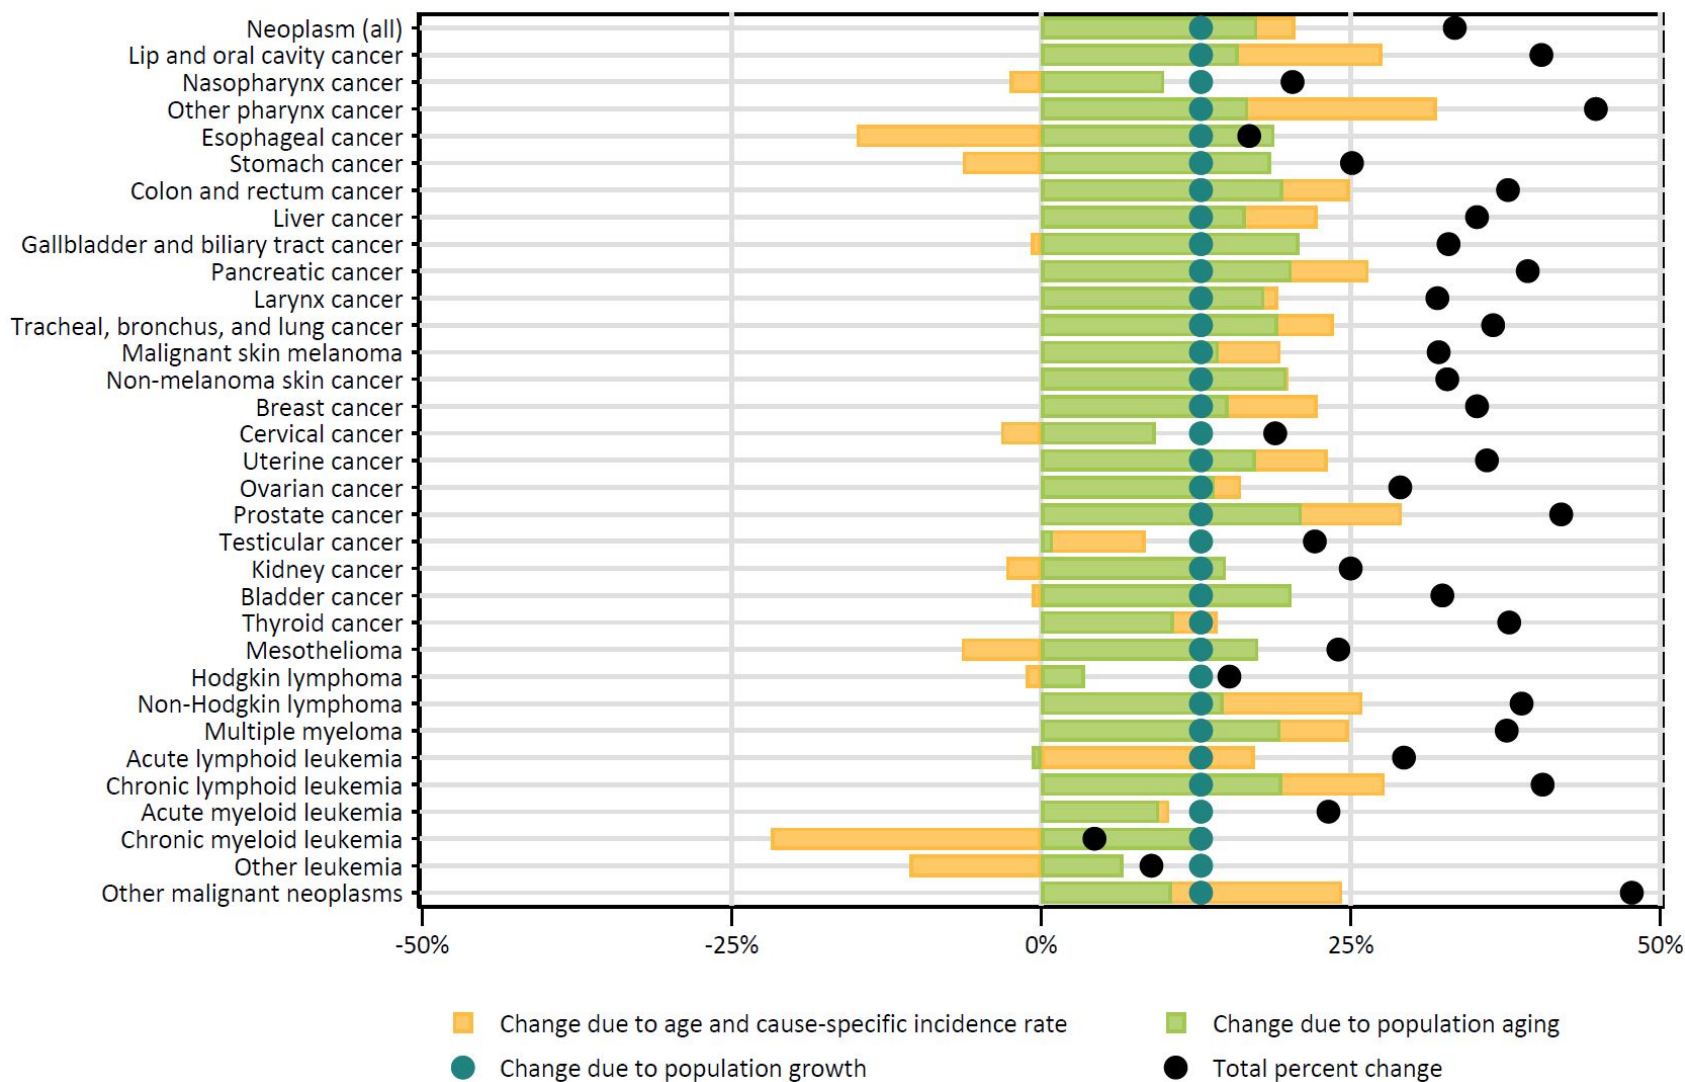

*eFigure 11: Global Decomposition of Changes in Cancer Incident Cases due to Population Growth, Population Aging, and Changes in Age-specific Incidence Rates, Both Sexes, 2007 to 2017.*

Results are also presented in eTable 14. To estimate the effect of population growth we applied the population size of 2017 onto the rate, sex, and age structure of 2007. Since the global population grew by 12.9% between 2007 and 2017, and rates and age structure remained the same as in 2007, incidence due to all cancers increased by 12.9% in this counterfactual scenario. To estimate the effect of aging on incident cases we applied the age structure of 2017 onto the rate, sex distribution, and population size of 2007. The change in incident cases reported herein shows the proportion of the change in incident cases between 2007 and 2017 that can be attributed to the changing age structure of the population. To estimate the effect of changing incidence rates on the incident cases we applied the incidence rates for 2007 onto the population size and age structure of 2007. The change in incident cases reported herein shows the proportion of the change in incident cases between 2007 and 2017 that can be attributed to a change in incidence rates.

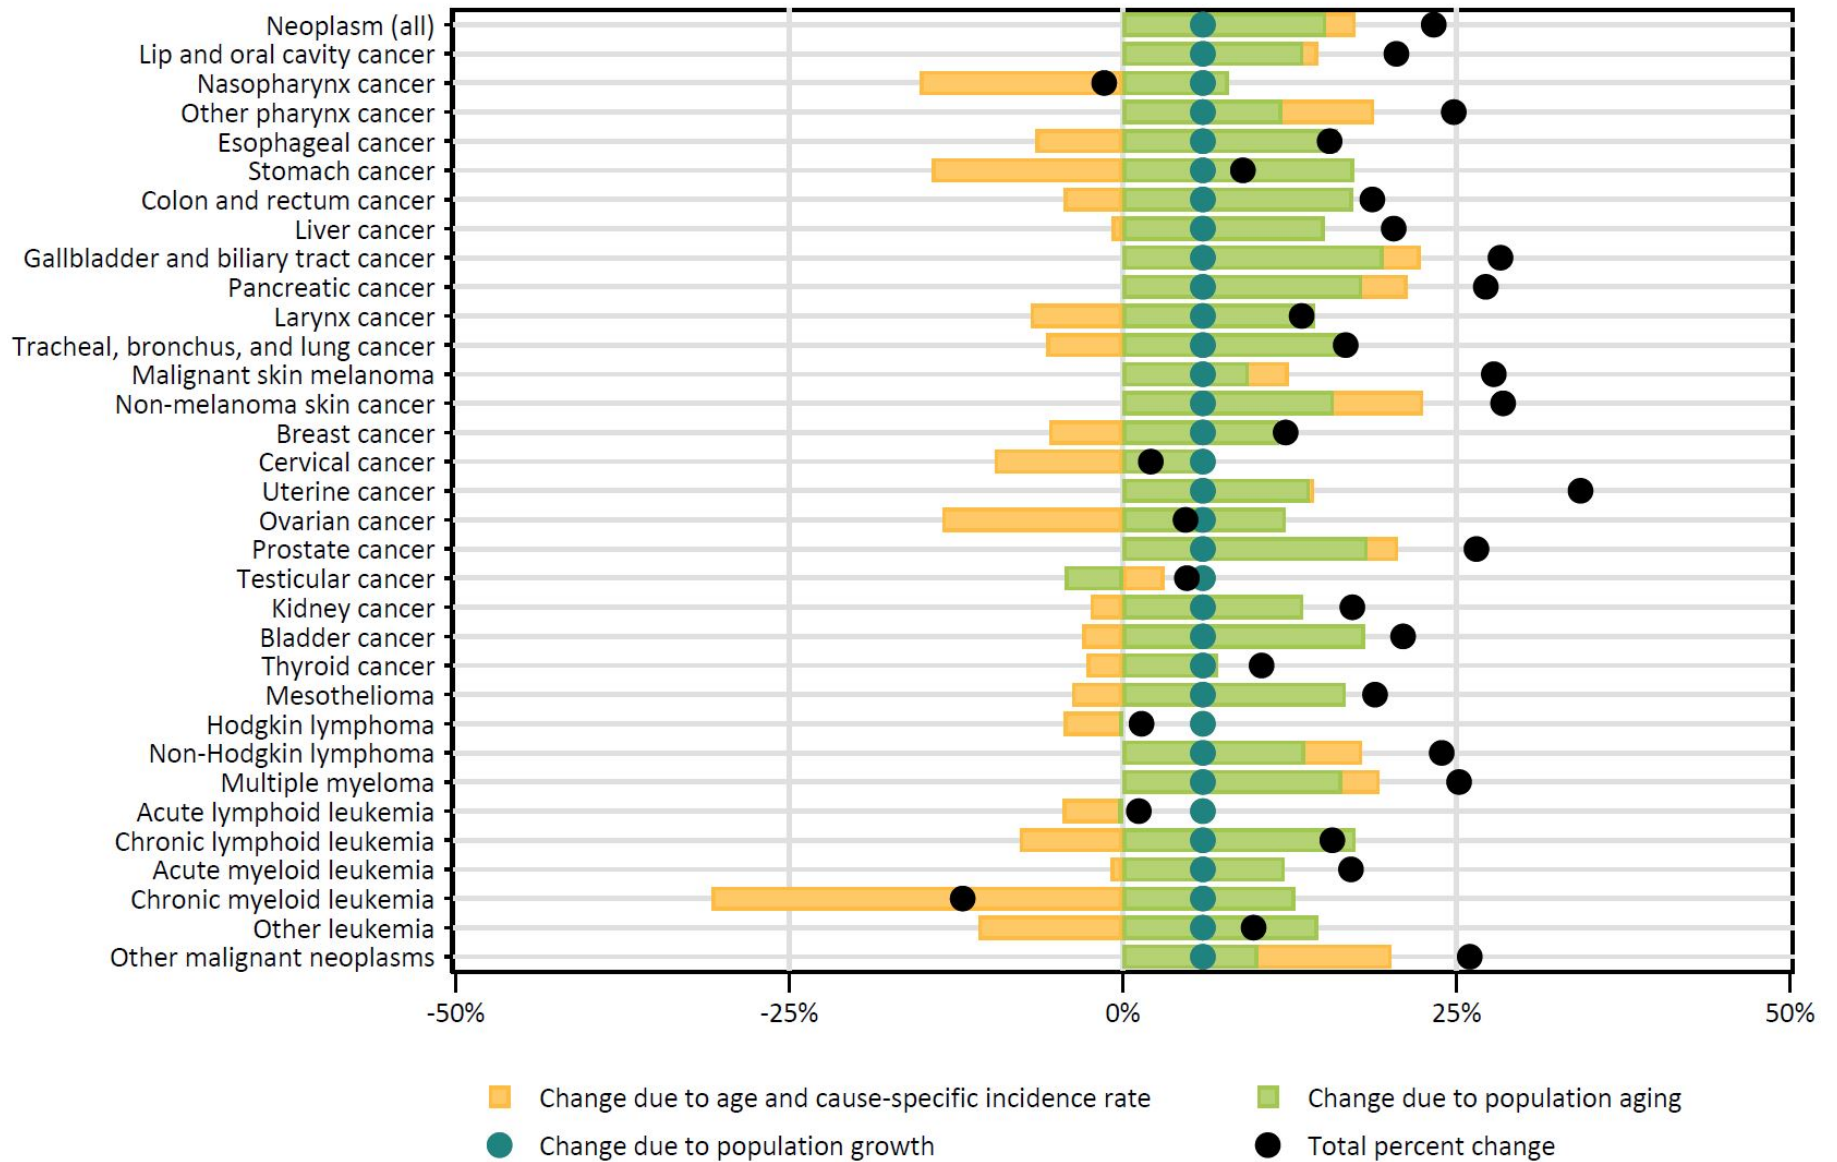

eFigure 12: High SDI Quintile Decomposition of Changes in Cancer Incident Cases due to Population Growth, Population Ageing, and Changes in Age-specific Incidence Rates, Both Sexes, 2007 to 2017.

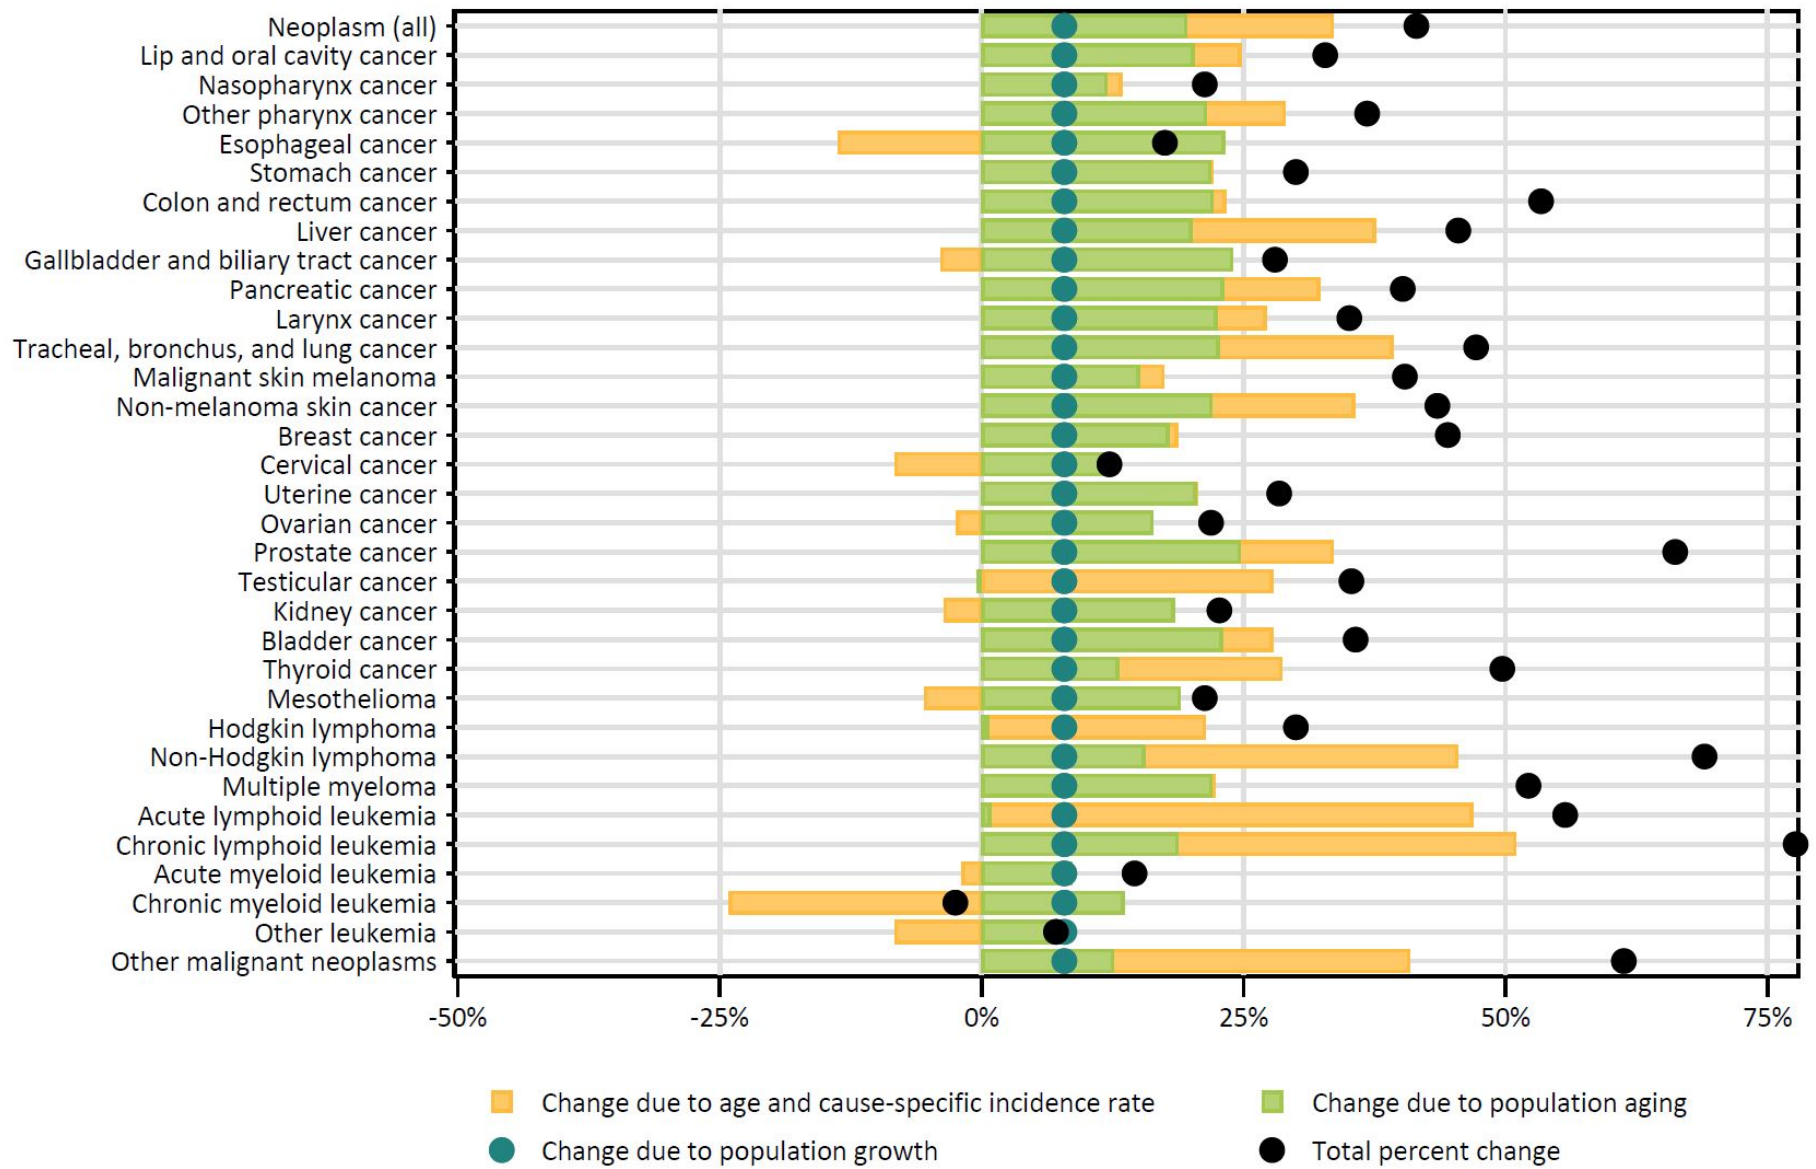

eFigure 13: High-middle SDI Quintile Decomposition of Changes in Cancer Incident Cases due to Population Growth, Population Ageing, and Changes in Age-specific Incidence Rates, Both Sexes, 2007 to 2017.



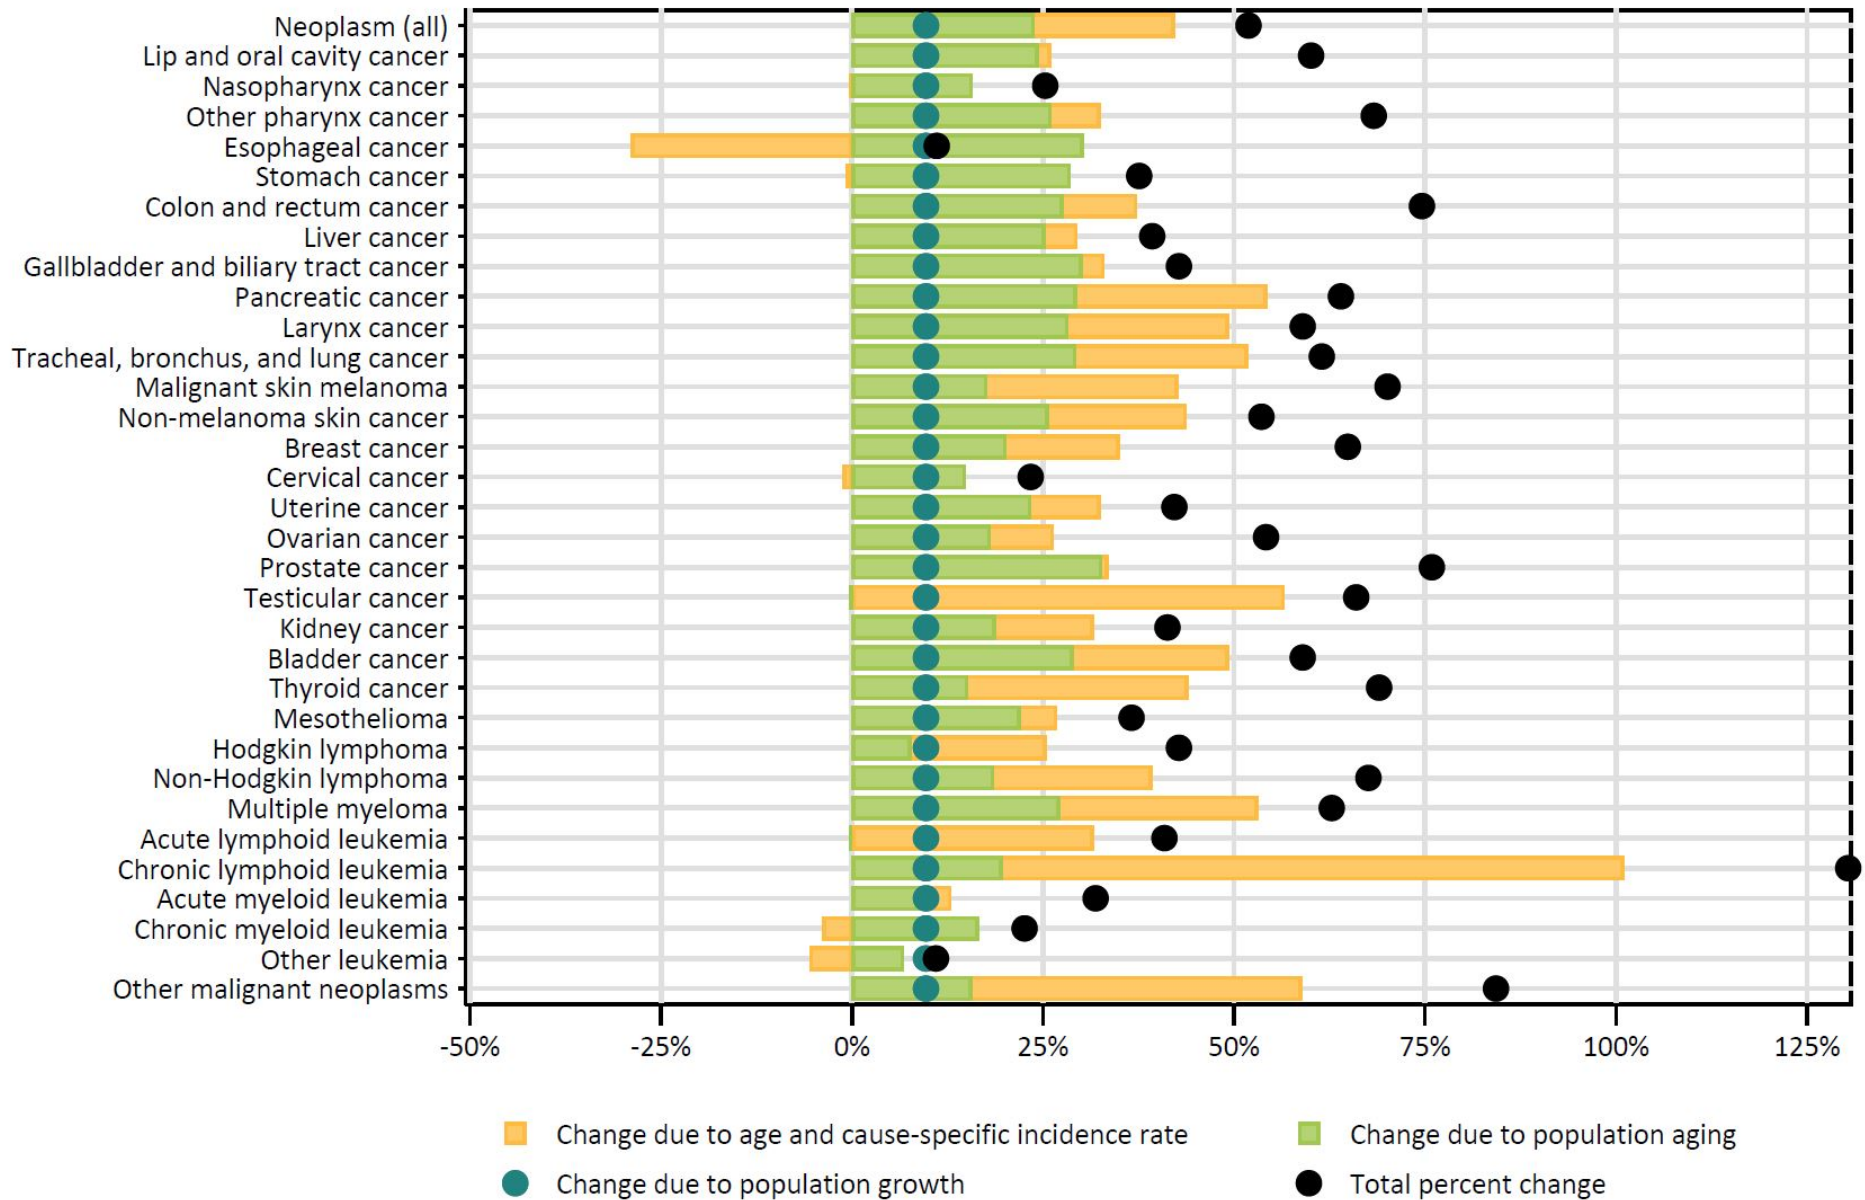

eFigure 14: Middle SDI Quintile Decomposition of Changes in Cancer Incident Cases due to Population Growth, Population Ageing, and Changes in Age-specific Incidence Rates, Both Sexes, 2007 to 2017.

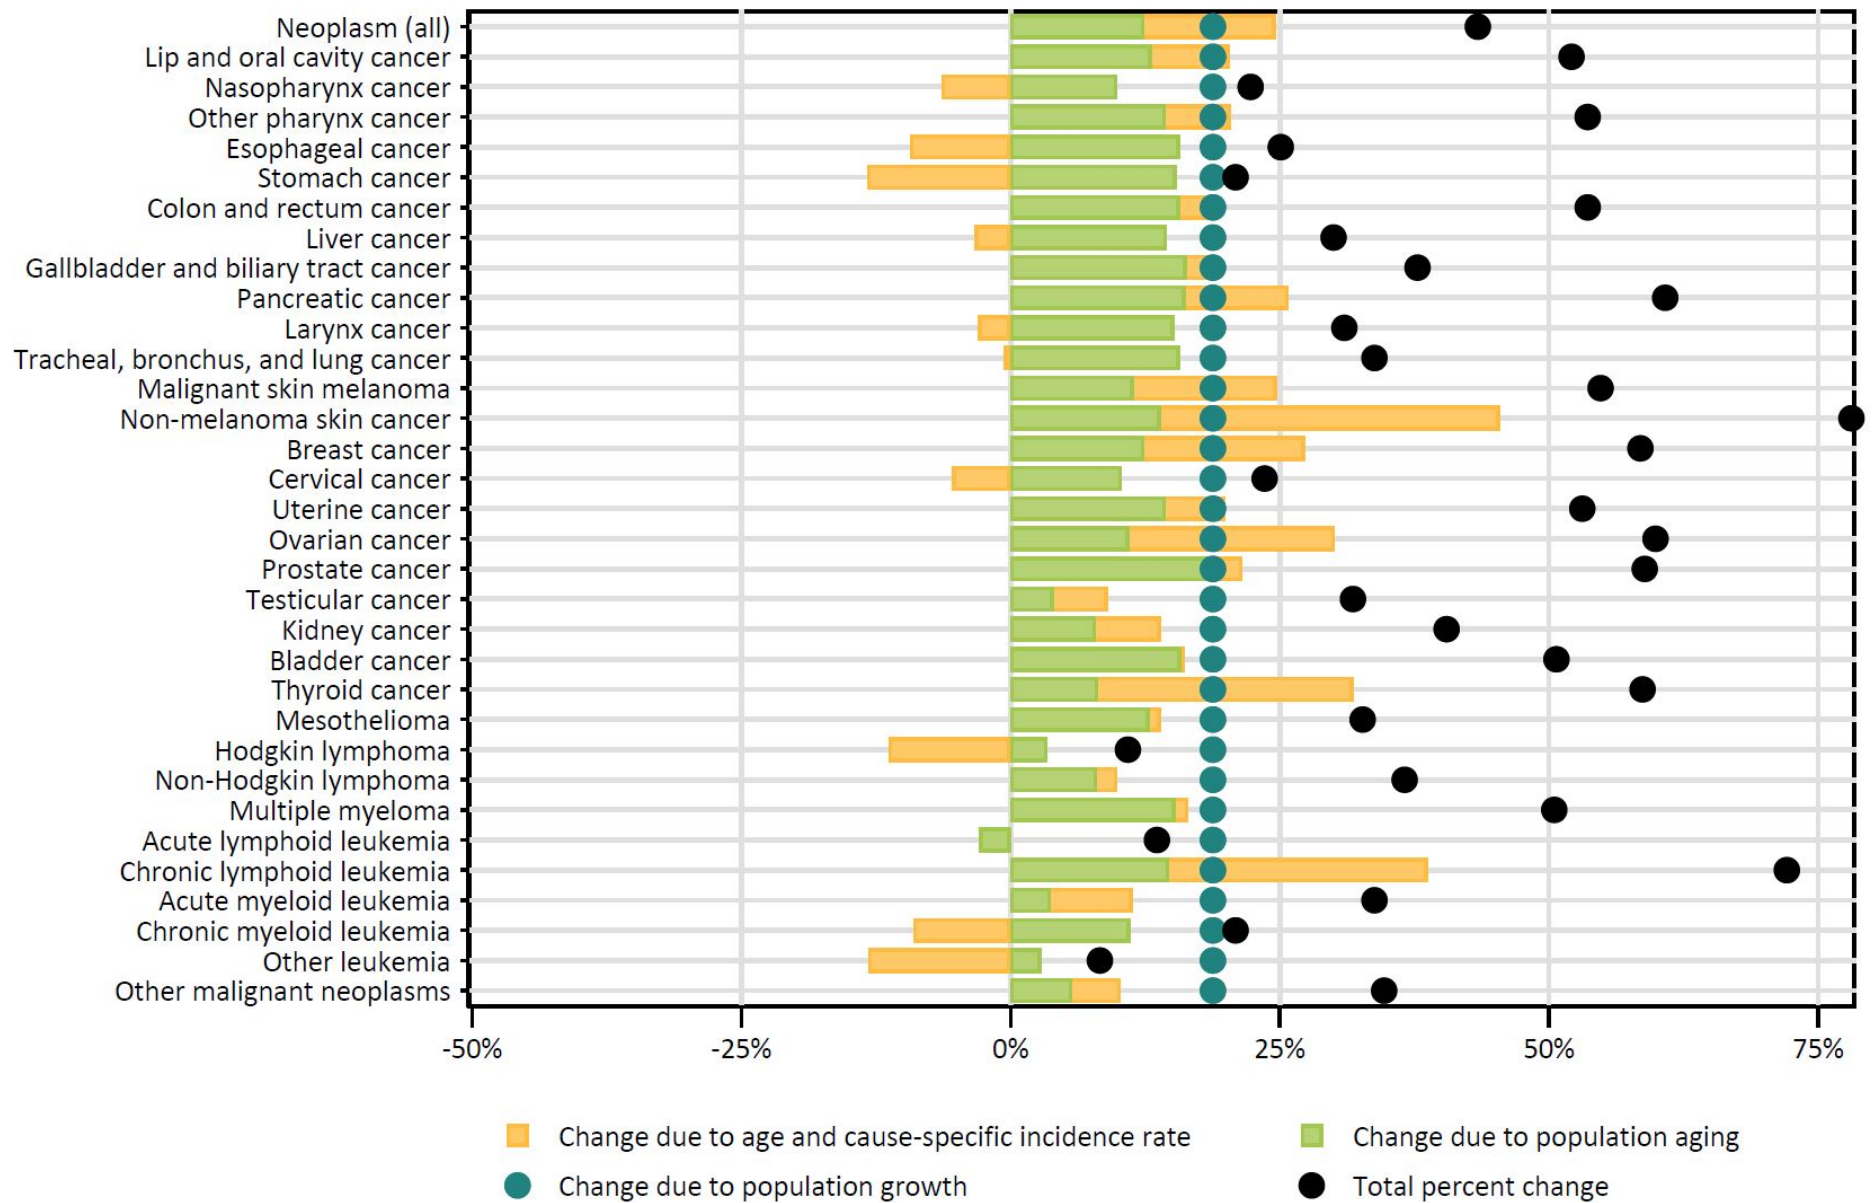

eFigure 15: Low-middle SDI Quintile Decomposition of Changes in Cancer Incident Cases due to Population Growth, Population Ageing, and Changes in Age-specific Incidence Rates, Both Sexes, 2007 to 2017.

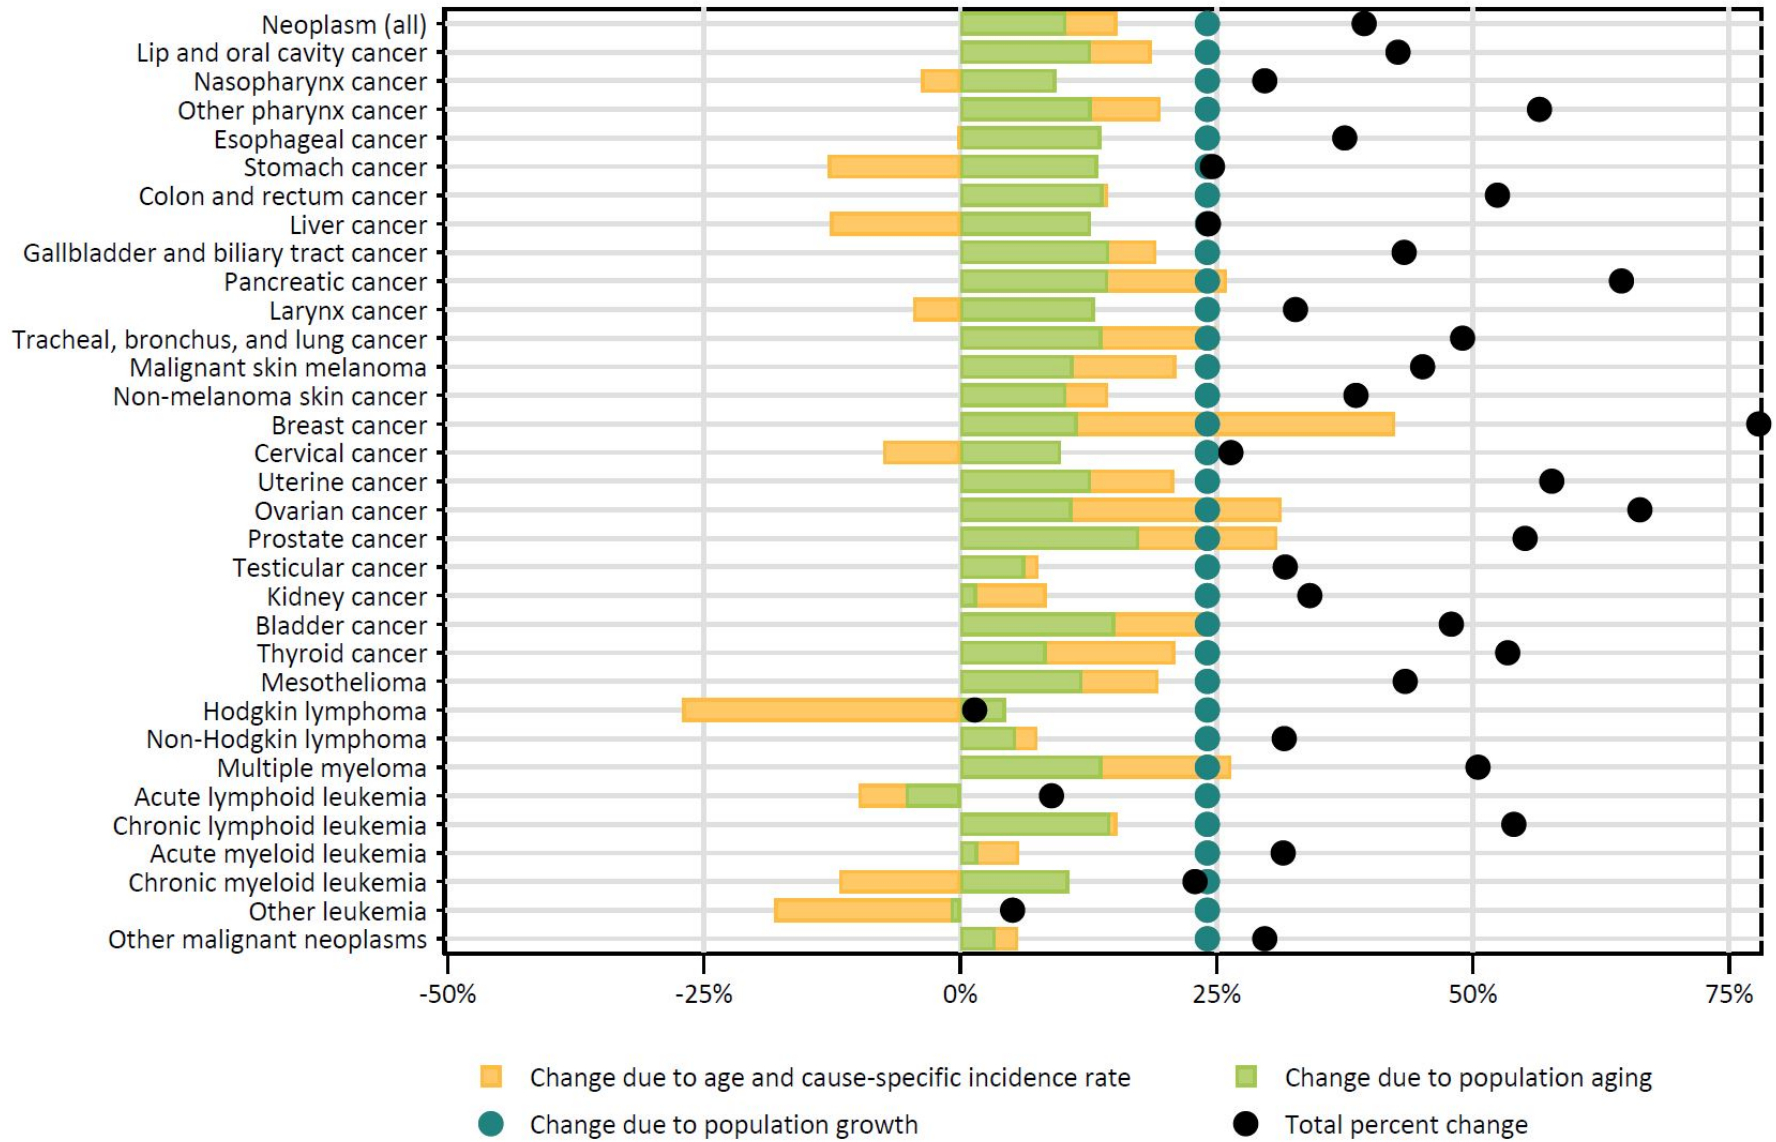

eFigure 16: Low SDI Quintile Decomposition of Changes in Cancer Incident Cases due to Population Growth, Population Ageing, and Changes in Age-specific Incidence Rates, Both Sexes, 2007 to 2017.
